# Supplementary material for: ROCK and the actomyosin network control biomineral growth and morphology during sea urchin skeletogenesis
Source: eLife. 2024 Apr 4;12:RP89080. doi: 10.7554/eLife.89080 (PMC10994658; doi:10.7554/eLife.89080)
Supplement: Figure 1—figure supplement 2—source data 1. [file elife-89080-fig1-figsupp2-data1.xlsx]

## Sheet: RNAseq data for ROCK Fig, 1 S2A
PL_FPKM.ID	SP_ANNOT.ref_gene_id	PLvsSP.gene	MM_ANNOT.MGI.symbol	PL0 FPKM Ave	PL4 FPKM Ave	PL8 FPKM Ave	PL14 FPKM Ave	PL18 FPKM Ave	PL24 FPKM Ave	PL30 FPKM Ave	PL36 FPKM Ave	PL0 FPKM stdev	PL4 FPKM stdev	PL8 FPKM stdev	PL14 FPKM stdev	PL18 FPKM stdev	PL24 FPKM stdev	PL30 FPKM stdev	PL36 FPKM stdev	PL_FPKM.length	SP_FPKM.SP0	SP_FPKM.SP10	SP_FPKM.SP18	SP_FPKM.SP24	SP_FPKM.SP30	SP_FPKM.SP40	SP_FPKM.SP48	KMEANS.km.10	KMEANS.km.10.isConserved
TRINITY_DN122025_c0_g1	Sp-Rhoapk1	WHL22.201754	Rock1	3.95036	4.81802	2.65083	1.53418	2.19374	3.85676	3.9613	4.2316	0.584466	0.681456	0.672315	0.141262	0.326394	0.280438	0.341557	0.490462	5293.75	1.98895	1.18019	3.4266	4.73686	5.98286	6.9617	8.26263	4	TRUE
