# Supplementary material for: ROCK and the actomyosin network control biomineral growth and morphology during sea urchin skeletogenesis
Source: eLife. 2024 Apr 4;12:RP89080. doi: 10.7554/eLife.89080 (PMC10994658; doi:10.7554/eLife.89080)
Supplement: Figure 1—source data 1. [file elife-89080-fig1-data1.xlsx]

## Sheet: 33h
33h
	DMSO 0205		skeletonic cells					ectoderm							Axt0 0205		skeletonic cells					ectoderm
	embryo		Area	green	red	red/ area			Area	green	red	red/ area	PMC/ectoderm				Area	green	red	red/ area			Area	green	red	red/ area	PMC/ectoderm
	1 al	1	70965	9908	5883	0.0829		2	192700	1	3763	0.0195278	4.24524		17	1	155830	20539	3708	0.0237952		2	316470	100	9620	0.0303978	0.782792
	1 body	1	100480	11617	5758	0.0573049		2	68126	19	1147	0.0168365	3.40362		17a	1	145890	16715	3391	0.0232435		2	95466	0	1943	0.0203528	1.14203
	1 MV	1	70264	541	1048	0.0149152		3	110770	0	425	0.00383678	3.88742		18	1	24318	1821	435	0.017888		3	147390	0	3774	0.0256055	0.698598
		2	68954	654	1611	0.0233634		3	110770	0	425	0.00383678	6.08933			2	199060	9894	4929	0.0247614		3	147390	0	3774	0.0256055	0.967032
black	2 body	1	161970	10284	9304	0.0574427		2	136620	82	3517	0.0257429	2.2314		19	1	248210	16677	7403	0.0298256		2	156610	294	4775	0.0304898	0.978216
black	3 AL	1	77881	12549	3851	0.0494472		2	279060	34	2708	0.00970401	5.09555		20	1	151040	6573	3363	0.0222656		2	292720	31	5938	0.0202856	1.09761
	3 body	1	140610	5662	7332	0.0521442		2	81671	360	4019	0.0492096	1.05963		21	1	36809	4010	2615	0.0710424		3	306180	18	4575	0.0149422	4.75448
	3 Ala	1	76254	9093	4402	0.0577281		2	228800	53	7825	0.0342002	1.68795			2	148760	8113	2322	0.015609		3	306180	18	4575	0.0149422	1.04463
nice	9 al	1	23665	1756	501	0.0211705		2	61814	17	855	0.0138318	1.53057		22	1	109390	7544	3725	0.0340525		2	259060	0	8185	0.031595	1.07778
	9 ala	1	30050	960	1266	0.0421298		2	64845	6	1272	0.019616	2.14772		22a	2	55899	6299	1605	0.0287125		5	149670	79	1565	0.0104563	2.74594
	9 body	2	30556	2767	1203	0.0393703		4	47625	14	1061	0.0222782	1.76721		non skeletogenic cells are very red	3	82975	5244	798	0.00961735		5	149670	79	1565	0.0104563	0.919763
		3	24182	1911	843	0.0348606		4	47625	14	1061	0.0222782	1.56479			4	23075	5365	577	0.0250054		5	149670	79	1565	0.0104563	2.39141
	11 al	1	88974	5698	3232	0.0363252		2	274760	214	6774	0.0246542	1.47339		23	1	224580	20875	4105	0.0182786		2	193010	0	3408	0.0176571	1.0352
	11 ala	1	37675	156	1023	0.0271533		4	344800	490	4974	0.0144258	1.88228		23a	1	60462	10909	1173	0.0194006		2	91564	0	2113	0.0230768	0.840699
		3	173650	15533	3494	0.0201209		4	344800	490	4974	0.0144258	1.39479		24	1	167590	37769	4649	0.0277403		2	124800	98	3774	0.0302404	0.917327
	11 body	1	342780	25748	14177	0.0413589		2	247380	288	6489	0.0262309	1.57672		24a	1	36435	786	1032	0.0283244		3	347930	119	9352	0.026879	1.05378
	12 al	1	65429	6051	2901	0.0443381		3	246150	126	2137	0.0086817	5.10708			2	171910	4173	3593	0.0209005		3	347930	119	9352	0.026879	0.777577
		2	220810	2711	9676	0.0438205		3	246150	126	2137	0.0086817	5.04745		25	1	249900	43226	6451	0.0258143		2	423720	268	17523	0.0413551	0.624211
	12 ala	1	160330	11011	4533	0.0282729		2	318330	1	4116	0.01293	2.18662		26	1	270170	37754	4136	0.0153089		2	303540	162	8106	0.0267049	0.573261
	12 body	2	350960	16166	7899	0.0225068		3	140110	140	683	0.00487474	4.61703		26a	1	236520	19137	5822	0.0246153		2	346120	0	10221	0.0295302	0.833561
	13 al	1	239940	14961	9913	0.0413145		2	417470	14	5642	0.0135147	3.05699		27	1	151230	8055	3049	0.0201613		2	221040	93	8362	0.0378303	0.532942
dark	13 ala	1	100740	1075	3296	0.0327179		2	317850	805	2132	0.00670757	4.87776		27a	2	101750	8069	3569	0.0350762		3	150270	134	7628	0.050762	0.690993
	13 body	1	324860	12243	5686	0.0175029		2	150370	107	2623	0.0174436	1.0034		28	1	132440	7558	2614	0.0197372		3	321030	46	5316	0.0165592	1.19192
	14 al	1	84297	1885	5124	0.0607851		3	299520	1	4702	0.0156985	3.87204			2	48118	14548	2705	0.056216		3	321030	46	5316	0.0165592	3.39485
		2	78295	4328	3527	0.0450476		3	299520	1	4702	0.0156985	2.86956		28a	1	118680	18418	3141	0.0264661		2	209690	1	7416	0.0353665	0.748339
	14 ala	1	122280	12239	3919	0.0320494		3	304010	202	2911	0.00957534	3.34708		29	1	72376	1075	1089	0.0150464		3	251920	14	11914	0.0472928	0.318155
		2	56634	3219	2557	0.0451496		3	304010	202	2911	0.00957534	4.71519			2	188530	14995	5398	0.028632		3	251920	14	11914	0.0472928	0.605421
	14 body	1	167730	6715	2446	0.014583		2	125640	885	780	0.00620821	2.34898		29a	1	222830	14130	7963	0.0357358		2	224280	239	9324	0.041573	0.85959
	15 al	1	133980	4510	2477	0.0184878		2	349200	101	3975	0.0113832	1.62414														1.19993
	15 ala	1	180750	2742	4024	0.0222628		4	381620	143	4166	0.0109166	2.03935
		2	40167	576	608	0.0151368		4	381620	143	4166	0.0109166	1.38658
		3	74450	2999	1494	0.0200672		4	381620	143	4166	0.0109166	1.83822
	15 body	1	300040	16018	4977	0.0165878		2	240360	215	1832	0.0076219	2.17633							0.844963
	16 al	1	102380	2882	3866	0.0377613		3	268540	381	1682	0.0062635	6.02878
		2	26231	775	1512	0.0576417		3	268540	381	1682	0.0062635	9.2028
	16 body	1	346950	12893	7650	0.0220493		2	156800	124	1436	0.00915816	2.40761
	16 PO	1	340860	15850	8700	0.0255237		2	318370	184	2815	0.00884191	2.88667
													3.07236
	DMSO 33h 0703														Axt0 33h 0703
	1 al	1	175510	14245	7349	0.0418723		2	357950	649	4153	0.0116022	3.609		11 BODY	1	79541	4298	2577	0.0323984		2	64582	71	1021	0.0158094	2.04932
	1 body	1	63575	12386	14116	0.222037		2	58706	98	1157	0.0197084	11.2661		11 PO	1	86146	10190	4273	0.0496018		2	68678	129	837	0.0121873	4.06996
	2 al	2	27120	4530	3592	0.132448		3	83996	222	3073	0.0365851	3.62028		12	2	96480	11994	2187	0.0226679		3	66251	812	671	0.0101281	2.23811
	2 body	1	53227	1305	6042	0.113514		2	45626	321	1261	0.0276378	4.1072		13	1	154110	4637	4220	0.027383		2	133370	112	655	0.00491115	5.57569
	2 PO	3	23510	3253	8819	0.375117		2	56618	43	2642	0.0466636	8.03875		14 DARK	1	126400	14705	630	0.00498418		2	89933	1028	153	0.00170127	2.92969
	3 AL	1	32064	1422	3158	0.0984905		2	64226	269	1197	0.0186373	5.28459		15	1	11854	458	324	0.0273325		3	61507	226	1694	0.0275416	0.99241
	3 BODY	1	67791	2858	4559	0.0672508		2	40435	274	1199	0.0296525	2.26796			2	17018	1561	434	0.0255024		3	61507	226	1694	0.0275416	0.92596
	3 PO	1	16360	2298	2150	0.131418		2	54702	51	896	0.0163797	8.02325		15 A	1	48338	392	1337	0.0276594		4	89149	55	2217	0.0248685	1.11223
	4 BODY	1	43432	2879	6050	0.139298		2	19055	20	311	0.0163212	8.53481			2	9125.1	205	170	0.0186299		4	89149	55	2217	0.0248685	0.749138
	4 PO	1	24970	3723	4740	0.189828		3	59180	76	1110	0.0187563	10.1207			3	9837.9	2131	724	0.0735929		4	89149	55	2217	0.0248685	2.95929
		2	13726	1848	5352	0.389917		3	59180	76	1110	0.0187563	20.7885		16	1	60936	6153	1478	0.024255		2	92249	161	1393	0.0151004	1.60624
	5 AL	1	35794	723	1653	0.0461809		2	45041	196	922	0.0204702	2.256		17	1	147290	5131	3980	0.0270215		2	150540	203	3515	0.0233493	1.15727
	5 BODY	1	37895	2690	3516	0.0927827		3	36833	1194	433	0.0117558	7.89253		18	1	55079	7978	2172	0.0394343		2	83795	245	2296	0.0274002	1.4392
		2	9930.1	1888	395	0.039778		3	36833	1194	433	0.0117558	3.38371		19	1	82728	10687	3462	0.041848		3	77289	540	1120	0.0144911	2.88785
	6 PO	1	56067	7684	6330	0.112901		2	57882	1508	2917	0.0503956	2.24029			2	9778.4	1624	448	0.0458153		3	77289	540	1120	0.0144911	3.16162
	6 Poa	1	33934	282	2035	0.0599694		4	43809	15	769	0.0175535	3.41638		20	1	73146	2491	1524	0.020835		2	58936	28	725	0.0123015	1.6937
		2	1007.8	1699	1592	1.57968		4	43809	15	769	0.0175535			20A	1	46734	2305	731	0.0156417		3	44749	30	492	0.0109947	1.42267
		3	35883	410	3808	0.106123		4	43809	15	769	0.0175535	6.04568			2	49623	5488	1156	0.0232956						0.0172091	2.17473
	7 AL	1	20427	4085	4390	0.214912		2	73961	243	2896	0.0391558	5.48863							0.0304388
	7 BODY	1	68042	8570	7034	0.103377		2	46487	286	1041	0.0223934	4.61643
	8 AL	1	21425	2535	2904	0.135543		2	67327	434	831	0.0123427	10.9816
	8 BODY	1	42992	2574	5667	0.131815		2	30199	91	723	0.0239412	5.50579
	9 BODY	1	60630	4930	6809	0.112304		2	54394	457	578	0.0106262	10.5686
	9 PO	1	39693	7648	4859	0.122415		2	102270	308	1280	0.0125159	9.78073
	10 BODY	1	68508	6855	6853	0.100032		2	41103	257	1016	0.0247184	4.04687
	10 PO	1	3309.3	2027	1993	0.602242		3	38548	31	765	0.0198454	30.3467
		2	2928.9	1192	3583	1.22333		3	38548	31	765	0.0198454
	10 Poa	1	40033	5651	3486	0.0870782		2	85619	245	1841	0.0215022	4.04973
						0.241845						0.0219509	7.54927
	DMSO 33h 2204														Axt0 33h 2204
	16 AL	1	182990	7081	4081	0.0223018		2	447560	127	3462	0.00773528	2.88312		9	1	336920	29107	11844	0.0351537		2	543390	332	17101	0.031471	1.11702
	6 al	1	249940	43362	24274	0.0971193		2	383140	392	18616	0.048588	1.99883		10	1	174250	41422	8020	0.0460258		2	338850	97	28821	0.0850553	0.541128
	6 body	1	309100	27115	28677	0.0927758		2	232500	243	10729	0.0461462	2.01047		10a	1	92697	8815	3796	0.0409506		3	232970	0	9605	0.0412285	0.99326
	6 al a	1	111050	14739	14382	0.129509		2	459940	664	20768	0.0451537	2.86819			2	26423	1799	2385	0.0902623		3	232970	0	9605	0.0412285	2.18932
	17 body	1	435170	16836	17133	0.0393708		2	379170	1666	4856	0.0128069	3.07418		11	1	401420	32783	33096	0.0824473		2	227520	12	13732	0.0603551	1.36604
	19 al	1	134550	3453	4790	0.0356001		2	467260	1247	12915	0.0276399	1.288		12	1	90765	6797	7284	0.0802512		3	377530	1789	17601	0.0466215	1.72134
	19 body	1	476230	10619	20237	0.0424942		2	385570	691	3964	0.0102809	4.13332			2	115290	12567	8881	0.0770318		3	377530	1789	17601	0.0466215	1.65228
	20 al	1	209850	21414	13092	0.0623874		2	318410	373	13986	0.0439245	1.42033		12a	1	27986	4485	1140	0.0407347		3	352910	81	15197	0.043062	0.945954
	20 body	1	108360	3821	6851	0.0632244		3	107110	45	1495	0.0139576	4.52975			2	207240	10181	13443	0.0648668		3	352910	81	15197	0.043062	1.50636
		2	228700	4400	13178	0.0576213		3	107110	45	1495	0.0139576	4.12831		13	1	412490	43509	26579	0.0644355		2	263760	404	11429	0.0433311	1.48705
	21 body	1	99951	2060	6657	0.0666026		5	233980	217	4248	0.0181554	3.66848		14	1	242050	22687	25574	0.105656		2	318870	184	21178	0.0664158	1.59082
		2	65895	3224	5247	0.0796267		5	233980	217	4248	0.0181554	4.38584		14a	1	75523	8246	4616	0.0611205		3	370570	407	23675	0.0638881	0.95668
		4	26204	2193	2538	0.0968554		5	233980	217	4248	0.0181554	5.3348			2	141940	34943	8641	0.0608778		3	370570	407	23675	0.0638881	0.952883
	22 al	1	148690	5405	10104	0.0679535		2	370220	127	10745	0.0290233	2.34134		15	1	146900	12568	9317	0.0634241		3	173100	55	6610	0.038186	1.66092
	7 al	1	80096	5616	4663	0.0582176		2	167310	3	4850	0.0289881	2.00833			2	96596	18029	7761	0.0803449		3	173100	55	6610	0.038186	2.10404
	7 al a	2	169370	7122	16153	0.0953711		3	356370	182	18038	0.0506159	1.88421		15a	1	172310	18584	9766	0.0566769		2	308500	1133	10730	0.0347812	1.62953
	7 body a	1	39036	8855	27649	0.708295		2	156440	3	8994	0.0574917	12.32		24	1	172910	7048	5049	0.0292002		2	301390	77	13476	0.0447128	0.65306
	7 body	1	178320	12035	22499	0.126172		2	172050	716	7231	0.0420285	3.00206		25	1	70825	8504	2788	0.0393646		3	216530	263	6722	0.0310442	1.26802
	8 al	1	79386	4401	3493	0.0440002		2	207380	467	7715	0.0372022	1.18273			2	161640	17106	5706	0.0353007		3	216530	263	6722	0.0310442	1.13711
	8 al a	1	130240	6818	16104	0.123649		2	286560	2	8261	0.0288282	4.28916		26	1	427660	35402	21235	0.0496539		2	466510	3775	11710	0.0251013	1.97814
	8 body	1	207600	5501	13339	0.0642534		2	169250	670	5760	0.0340325	1.888														1.37255
	body	1	351090	12985	21304	0.0606796		2	288340	3302	7806	0.0270722	2.2414
	4 body	1	195220	7860	10778	0.0552095		3	314600	1388	8978	0.0285378	1.93461
		2	65399	2711	7022	0.107372		3	314600	1388	8978	0.0285378	3.76243
													3.27408
	DMSO 33h 2002 actin in red			phalloidin	red=rock
	1 al	2	25400	1397	8248	0.324724		4	209450	23496	10073	0.0480926	6.75206
		3	48085	2076	19952	0.414932		4	209450	23496	10073	0.0480926	8.62777
	2 po	1	1017.6	378	6398	6.28734		5	285220	11899	18921	0.0663383	94.777
		3	68299	819	10169	0.148889		5	285220	11899	18921	0.0663383	2.2444
		4	36818	322	3745	0.101717		5	285220	11899	18921	0.0663383	1.5333
	2 po b	2	176460	6549	12288	0.0696362		3	229420	9721	3892	0.0169645	4.10481
	3 body	1	116010	3732	9225	0.079519		2	276550	24941	6491	0.0234713	3.38792
	3 po	1	50586	10966	15383	0.304096		2	325270	33813	8164	0.0250991	12.1158
	4 al	1	97666	469	10193	0.104366		2	211730	8841	1058	0.00499693	20.886
	4 al a	2	95400	1351	15893	0.166593		3	186650	12283	1626	0.00871149	19.1234
	4 body	1	182700	2925	16286	0.0891407		2	67492	5925	536	0.00794168	11.2244
	5 po	1	242930	5435	18434	0.0758819		2	374060	27758	4425	0.0118297	6.41455
	5 po a	1	38438	747	3517	0.091498		5	334900	13478	2762	0.00824724	11.0944
		2	24079	682	1149	0.0477179		5	334900	13478	2762	0.00824724	5.78593
		3	95314	1506	4320	0.0453239		5	334900	13478	2762	0.00824724	5.49564
		4	114680	1428	7059	0.0615539		5	334900	13478	2762	0.00824724	7.46358
	6 al a	1	113230	5156	11532	0.101846		2	292830	16849	3479	0.0118806	8.57244
	6 al b	1	90496	821	10722	0.11848		2	218260	2394	1327	0.0060799	19.4872
	6 po	1	184900	10830	17863	0.096609		2	314720	39073	4399	0.0139775	6.91175
	6 po a	1	82697	3154	8126	0.0982623		2	227410	19660	2421	0.010646	9.23
	7 al	1	97008	3303	9647	0.0994454		2	331770	11332	4149	0.0125057	7.95204
	7 body	1	88332	533	6507	0.0736653		2	147380	2405	901	0.00611345	12.0497
	8 po	1	126950	15987	11555	0.0910201		2	202370	12189	1701	0.0084054	10.8288
	8 poa	1	145900	13962	6375	0.0436943		3	356210	17579	3137	0.0088066	4.96154
		2	185350	17069	13173	0.0710709		3	356210	17579	3137	0.0088066	8.07019
	9 po	1	191820	884	13903	0.0724794		2	367540	2333	1205	0.00327855	22.1071
	9 po a	1	158870	125	11386	0.0716687		2	254520	1304	3104	0.0121955	5.87665
	10 po	1	97761	351	10647	0.108908		2	250370	1462	7712	0.0308024	3.53571
													12.1648

## Sheet: 27h
27h
	DMSO 0205 27h		skeletonic cells					ectoderm							Axt0 0205		skeletonic cells					ectoderm
	embryo		Area	green	red	red/ area			Area	green	red	red/ area	pmc/ectoderm				Area	green	red	red/ area			Area	green	red	red/ area	pmc/ectoderm
	1	1	192530	8730	8400	0.0436296		2	465240	323	12382	0.0266142	1.63933		13	1	521000	56574	10847	0.0208196		3	407600	1470	3358	0.00823847	2.52712
	1a	1	345010	20887	12724	0.0368801		2	421160	1598	10517	0.0249715	1.47689		13a	1	372930	12779	7605	0.0203926		2	406630	693	3348	0.00823353	2.47677
	2	1	310170	26880	11973	0.0386014		2	474330	612	8755	0.0184576	2.09135		14	1	100530	5340	1774	0.0176465		3	412090	61	3158	0.00766337	2.3027
	2a	1	356680	23059	13187	0.0369715		2	566020	1787	12445	0.0219869	1.68153			2	242820	28186	2989	0.0123095		3	412090	61	3158	0.00766337	1.60628
	3	1	392610	41213	10885	0.0277247		2	495060	2355	9115	0.0184119	1.5058		14a	1	416310	47960	5319	0.0127765		2	389790	1813	3008	0.00771698	1.65564
	3a	1	321120	34329	10225	0.0318417		2	462540	1046	10422	0.0225321	1.41317		15	1	211310	18822	5583	0.0264209		2	373580	0	3479	0.0093126	2.83711
	4	1	264590	13526	7881	0.0297857		2	504710	508	6387	0.0126548	2.35371		15a	1	354340	28718	5226	0.0147485		2	341170	295	1436	0.00420905	3.50401
	4a	1	159300	5626	7632	0.0479096		2	435340	828	7864	0.018064	2.65221		16	1	417590	17005	10360	0.024809		2	473610	243	7933	0.0167501	1.48113
	5	1	69308	2092	2652	0.038264		3	484020	1287	13092	0.0270485	1.41464		16a	1	254710	19282	5271	0.0206941		2	608500	368	7304	0.0120033	1.72404
		2	118690	5253	4551	0.0383436		3	484020	1287	13092	0.0270485	1.41759		17	1	387390	18979	10157	0.0262191		3	510880	40	9223	0.0180532	1.45232
	6	1	51027	10218	3999	0.0783703		3	379640	187	9861	0.0259746	3.01719		17a	1	224310	23795	3242	0.0144532		2	488040	84	4498	0.00921646	1.5682
		2	206090	8115	10696	0.0518997		3	379640	187	9861	0.0259746	1.99809		18	1	204590	12516	2972	0.0145266		2	351090	139	3620	0.0103107	1.40888
	6a	1	225620	39942	15068	0.0667849		2	436540	1992	9519	0.0218056	3.06274		18a	1	259470	12888	5581	0.0215092		2	443570	293	7794	0.0175711	1.22413
	7	1	254980	17905	6943	0.0272296		2	448340	1082	9431	0.0210354	1.29447		19	1	434220	27126	4814	0.0110865		2	368690	241	2792	0.00757276	1.464
	7a	1	235860	24111	4896	0.0207581		2	418180	522	6390	0.0152805	1.35847		20	1	378060	57823	10182	0.0269322		2	560620	2013	4165	0.00742927	3.62515
	8	1	219680	4394	5556	0.0252913		3	507270	1365	11905	0.0234688	1.07766		21	1	526800	24765	16648	0.0316021		2	482120	146	3610	0.00748776	4.2205
		2	36805	9324	1196	0.0324956		3	507270	1365	11905	0.0234688	1.38463		22	1	262560	35207	3831	0.014591		2	431120	625	3830	0.00888384	1.64242
	8a	1	268990	17286	11002	0.0409011		2	516450	514	11743	0.0227379	1.79881		23	1	523470	31071	25400	0.0485224		2	576440	312	5530	0.00959337	5.05791
תאים שאינם תאי שלד אדומים מאד	9	1	92547	4229	285	0.00307952		3	298860	822	869	0.00290772	1.05908		23a	1	393080	30518	10350	0.0263305		2	493370	82	7194	0.0145813	1.80577
		2	131450	9863	867	0.00659566		3	298860	822	869	0.00290772	2.26833														2.2939
	10	1	21370	10975	2378	0.111277		3	465960	603	11505	0.024691	4.50681
		2	202050	2307	4791	0.023712		3	465960	603	11505	0.024691	0.96035
	10a	1	192770	2365	4604	0.0238834		3	500810	541	8939	0.0178491	1.33807
		2	51754	2859	1458	0.0281717		3	500810	541	8939	0.0178491	1.57833
	11	1	402800	13617	9179	0.022788		2	586660	1860	6186	0.0105444	2.16114
	11a	1	426970	22840	9087	0.0212825		2	572960	716	5811	0.0101421	2.09844
	12	1	345890	36285	8769	0.025352		2	529330	2147	12292	0.0232218	1.09173
	12a	1	318250	27017	7498	0.0235601		2	406820	2110	7650	0.0188044	1.2529
													1.81977
	DMSO 0204 27h		skeletonic cells					ectoderm							Axt0 0204		skeletonic cells					ectoderm
	embryo	Area	green	red	red/ area			Area	green	red	red/ area					Area	green	red	red/ area			Area	green	red	red/ area
	1	1	347150	32084	4452	0.0128244		2	384370	337	22771	0.0592424	0.216474		15	1	239590	10483	5112	0.0213364		2	506990	473	10239	0.0201957	1.05649
	2	2	180950	21358	5036	0.0278309		3	363380	4063	14373	0.0395536	0.703624		15a	1	223650	18560	1217	0.00544154		2	389870	259	3523	0.00903635	0.602183
	2a	1	291620	24606	11209	0.038437		2	341610	3080	4764	0.0139457	2.75619		16	1	258550	6397	2855	0.0110424		2	471160	979	4080	0.00865948	1.27518
	3	1	278710	49373	13010	0.0466793		2	392970	678	21536	0.0548032	0.851764		16a	1	102150	796	1116	0.0109251		2	389120	450	4750	0.012207	0.894985
	3a	1	40305	11923	4117	0.102146		2	308260	53	10374	0.0336534	3.03524		17	1	224340	2559	4371	0.0194838		3	529020	0	6778	0.0128124	1.5207
	4	1	271460	17972	11750	0.0432845		2	271840	81	7376	0.0271336	1.59523			2	30975	7303	455	0.0146893		3	529020	0	6778	0.0128124	1.14649
	5	1	389030	13158	6161	0.0158368		2	505160	1440	8101	0.0160365	0.987549		18	1	268020	10841	4182	0.0156033		2	471700	2347	4041	0.00856689	1.82135
	6	1	59882	21247	2750	0.0459236		4	304600	1	5180	0.0170059	2.70045		19	1	645620	50413	12479	0.0193287		2	457740	1268	5735	0.0125289	1.54272
		2	44035	2147	349	0.00792551		4	304600	1	5180	0.0170059	0.466045		20	1	226660	6444	3096	0.0136592		3	322370	93	3093	0.00959457	1.42364
		3	34057	5824	481	0.0141234		4	304600	1	5180	0.0170059	0.830498		21	1	225290	11094	5350	0.0237472		2	385450	524	6842	0.0177507	1.33782
	6a	1	201560	19006	1511	0.00749653		3	305940	253	5282	0.0172648	0.434208		22	1	204520	4442	4286	0.0209564		2	324120	202	5672	0.0174997	1.19753
		2	32931	4565	358	0.0108712		3	305940	253	5282	0.0172648	0.629674		23	1	467640	36832	4767	0.0101937		2	535510	2152	3266	0.00609886	1.67142
	7	1	304850	22670	8243	0.0270395		2	398380	107	11637	0.0292108	0.925669		24	1	192020	12215	2110	0.0109884		3	482550	86	3213	0.00665838	1.65032
	8	1	223720	4181	4769	0.0213168		2	480120	183	16519	0.034406	0.619567			2	71264	10996	390	0.00547261		3	482550	86	3213	0.00665838	0.821913
	14	2	555660	38027	8410	0.0151352		3	539070	2172	3899	0.00723283	2.09256		24a	1	175100	6181	1519	0.00867504		2	336450	40	2315	0.00688067	1.26079
	10	3	239810	16667	4097	0.0170844		4	505170	3487	13464	0.0266524	0.641006		25	1	412470	27168	4846	0.0117487		2	527870	347	3895	0.00737871	1.59225
	11a	1	306420	22983	5562	0.0181516		2	372680	643	5695	0.0152812	1.18784		25a	1	604800	34925	9893	0.0163575		2	388250	18	5328	0.0137231	1.19196
	12	1	270170	5103	4478	0.0165747		4	462910	2005	5053	0.0109157	1.51843		27	1	156600	10507	3455	0.0220626		2	424570	631	10164	0.0239395	0.921597
		2	51639	12349	694	0.0134395		4	462910	2005	5053	0.0109157	1.2312		27a	1	141480	11267	1312	0.0092734		2	268820	68	6859	0.0255152	0.363446
		3	99797	4789	1783	0.0178663		4	462910	2005	5053	0.0109157	1.63675		28	1	266700	22629	3411	0.0127897		2	447920	84	5603	0.0125089	1.02244
	12a	1	92436	8261	2318	0.0250768		3	466580	7	3236	0.00693557	3.61568														1.21576
		2	195290	5663	8032	0.0411286		3	466580	7	3236	0.00693557	5.93009
	13	1	415090	33074	3712	0.00894264		2	377360	1123	2594	0.00687407	1.30092
	13a	1	310950	26060	6632	0.0213282		2	505150	1152	8613	0.0170504	1.25089
	14a	1	633930	36225	9542	0.0150521		2	556030	210	6838	0.0122979	1.22396
													1.53526
יש Y0	DMSO 2002 27h		skeletonic cells					ectoderm							Axt0 2002		skeletonic cells					ectoderm
	embryo	Area	green (phalloidin)	red	red/ area			Area	green	red	red/ area				zoom5	Area	green (phalloidin)	red	red/ area			Area	green	red	red/ area
	2a	1	356840	5839	8159	0.0228646		2	163240	3644	3324	0.0203627	1.12287		25	2	464410	53215	16510	0.0355505		3	511460	16556	8538	0.0166934	2.12961
	2b	1	393270	5638	5154	0.0131055		2	277340	1680	1824	0.00657676	1.9927		25a	1	248520	12158	3067	0.0123411		2	324790	32680	8284	0.0255057	0.483855
	3	1	68931	151	1080	0.0156678		3	271750	13396	5763	0.021207	0.738805		26	1	198810	27111	11519	0.0579397		3	342270	25812	6000	0.01753	3.30517
		2	380680	5718	21571	0.0566644		3	271750	13396	5763	0.021207	2.67197			2	300330	28790	10523	0.0350381		3	342270	25812	6000	0.01753	1.99875
	4A	1	354620	2928	18098	0.0510349		2	389210	6792	9269	0.0238149	2.14298		27	1	692440	74702	17563	0.0253639		2	613790	54793	3607	0.0058766	4.31609
	4	1	438180	6294	16377	0.0373751		2	271240	5110	4875	0.017973	2.07951		27a	1	479510	73925	6612	0.0137891		2	258700	15063	1597	0.00617317	2.23371
	5	1	144930	1195	5276	0.0364038		3	339030	4593	7423	0.0218948	1.66267		28	1	58860	22315	5752	0.0977234		3	354230	21806	4491	0.0126782	7.70799
		2	359300	4949	20314	0.0565377		3	339030	4593	7423	0.0218948	2.58224			2	50950	13877	5453	0.107026		3	354230	21806	4491	0.0126782	8.44177
	5a	1	233980	1995	8879	0.0379477		2	452100	7076	5835	0.0129064	2.94021		29	1	296670	30062	7749	0.0261199		2	451770	56325	11648	0.025783	1.01307
	6	1	151790	1004	14204	0.0935767		3	471820	11989	7558	0.0160188	5.84167		29a	1	370790	38288	13648	0.0368079		2	548830	41395	12509	0.0227921	1.61494
		2	159130	551	9059	0.0569283		3	471820	11989	7558	0.0160188	3.55384		30	1	95713	31520	9316	0.0973327		2	390430	33463	2552	0.00653638	14.8909
	33	1	68899	48	2994	0.0434549		3	135980	1071	1116	0.00820709	5.2948		30a	1	258860	15296	7890	0.0304798		2	455420	20764	8816	0.019358	1.57454
		2	296500	1924	9822	0.0331265		3	135980	1071	1116	0.00820709	4.03632		31	1	282820	2634	7380	0.0260943		3	293280	7855	9042	0.0308306	0.846378
	33a	1	333790	1520	13716	0.0410917		2	370700	6409	11031	0.0297572	1.3809			2	141990	286	1909	0.0134446		3	293280	7855	9042	0.0308306	0.43608
	34	1	380540	4824	13913	0.0365612		2	578390	12028	15075	0.0260637	1.40276		32	1	248680	2994	8733	0.0351174		2	215160	2672	6048	0.0281093	1.24932
	34a	1	97784	363	7277	0.0744191		3	410270	5940	7981	0.019453	3.82558														3.48281
		2	83399	367	5223	0.0626267		3	410270	5940	7981	0.019453	3.21938
	35	1	218680	694	17465	0.0798656		2	367230	2060	4991	0.0135909	5.87638
	36	1	227910	3835	12525	0.0549559		2	301370	11494	13975	0.0463716	1.18512
	37	1	326430	10539	11437	0.0350366		5	438340	11463	10372	0.023662	1.48071
		2	112280	3185	5946	0.0529569		5	438340	11463	10372	0.023662	2.23806
	7	1	63376	1048	2074	0.0327253		3	353370	7014	5774	0.0163398	2.0028
		2	266560	6484	19280	0.0723289		3	353370	7014	5774	0.0163398	4.42655
	8a	1	237540	2503	7127	0.0300034		2	441710	11236	11797	0.0267076	1.1234
	9	1	319710	3510	12824	0.0401114		2	415020	6064	7347	0.0177028	2.26582
													2.68352
	DMSO 0803 27h		skeletonic cells					ectoderm							Axt0 0803		skeletonic cells					ectoderm
		embryo	Area	green (phalloidin)	red	red/ area			Area	green	red	red/ area					Area	green (phalloidin)	red	red/ area			Area	green	red	red/ area
	1	1	505530	18232	10549	0.0208672		2	505880	1967	3490	0.00689887	3.02473		14	2	133360	2453	2309	0.017314		3	180690	359	2783	0.0154021	1.12414
	1a	1	377640	6579	4009	0.0106159		2	415920	409	2851	0.00685468	1.54871		14a	1	37416	2272	9	0.000240539		3	402720	1394	520	0.00129122	0.186288
		1	207030	22103	8888	0.00685468		2	540330	307	6390	0.0118261	0.579623			2	121840	8707	128	0.00105056		3	402720	1394	520	0.00129122	0.813617
	2	1	394980	7635	3786	0.0118261		2	496860	264	3222	0.00648472	1.82369		15	1	243360	21817	1956	0.00803748		2	401360	3316	2135	0.00531941	1.51097
	4	1	410110	14967	5269	0.00648472		2	511660	2003	2341	0.0045753	1.41733		16	1	430770	27486	807	0.00187339		2	389620	5174	336	0.000862379	2.17235
	5	1	460480	18990	17525	0.0045753		2	560300	819	4347	0.00775834	0.589727		17	1	475730	30415	4859	0.0102138		2	532010	823	5367	0.0100882	1.01245
	5a	1	413170	19223	13446	0.00775834		2	567560	1510	4174	0.00735429	1.05494		18	1	551800	11264	2809	0.00509061		2	351950	2586	3645	0.0103566	0.491534
black	6	1	56359	6145	1667	0.00735429		2	93615	732	1691	0.0180633	0.407139		19	1	387980	25042	3889	0.0100237		2	455590	1393	2651	0.00581883	1.72263
black	6a	1	37935	5790	1438	0.0180633		3	76936	151	1411	0.0183399	0.98492		20	1	534050	17997	4842	0.00906657		2	367750	774	3331	0.00905778	1.00097
black		2	10364	446	163	0.0157275		3	76936	151	1411	0.0183399	0.857557		21	1	621730	40223	7827	0.0125891		2	667660	1310	3694	0.00553276	2.27537
black	7	1	30781	3511	1680	0.0183399		2	69268	506	1433	0.0206878	0.88651		22	1	257590	37236	2528	0.00981405		2	388580	2574	2411	0.00620464	1.58173
	7a	1	44211	6343	2544	0.0183399		2	70150	242	1108	0.0157947	1.16114		23	1	98867	10481	790	0.00799053		3	488140	2548	4593	0.00940919	0.849227
	8	1	14615	537	720	0.0206878		3	80217	764	1359	0.0169415	1.22113			2	212780	30426	2655	0.0124777		3	488140	2548	4593	0.00940919	1.32612
		2	16470	4868	893	0.0157947		3	80217	764	1359	0.0169415	0.932307		24	1	87574	20514	504	0.00575513		3	685270	3740	2717	0.00396486	1.45153
	8a	1	39842	3650	2740	0.0169415		3	72607	139	1792	0.0246808	0.686426			2	425630	14519	3471	0.00815497		3	685270	3740	2717	0.00396486	2.05681
		2	11475	3529	570	0.0169415		3	72607	139	1792	0.0246808	0.686426		25	1	307410	18148	5627	0.0183045		2	203720	1670	2949	0.0144758	1.2645
	9	1	21644	3600	1031	0.0246808		3	72168	166	573	0.00793981	3.10849														1.30251
		2	32659	3976	944	0.0246808		3	72168	166	573	0.00793981	3.10849
	10	1	369560	38216	20765	0.00793981		2	510050	852	5205	0.0102049	0.77804
	11	1	72061	2970	3520	0.00793981		3	342980	782	5389	0.0157123	0.505325
		2	168860	38026	9587	0.0102049		3	342980	782	5389	0.0157123	0.649484
	12	1	102970	16281	2593	0.0157123		3	401490	456	3976	0.00990311	1.5866
		2	81857	6333	2255	0.0157123		3	401490	456	3976	0.00990311	1.5866
black	13	1	324310	17069	8284	0.00990311		2	326480	778	3584	0.0109777	0.902112
black	13a	1	135350	5936	4861	0.00990311		2	341310	3956	5200	0.0152354	0.650006
													1.2295

## Sheet: 22h
22h
	DMSO 0205		skeletonic cells					ectoderm						Axt0 0205		skeletonic cells					ectoderm
	embryo	Area	green	red	red/ area			Area	green	red	red/ area	pmc/ectoderm			Area	green	red	red/ area			Area	green	red	red/ area	PMC/ECTODEM
1 z4	1	130630	4439	2412	0.0184644		4	339840	8	8171	0.0240437	0.767951	11	1	66605	8439	840	0.0126117		3	525430	0	1730	0.00329254	3.83037
	2	66731	11930	1558	0.0233475			339840	8	8171	0.0240437	0.971044		2	230640	36567	3261	0.0141389		3	525430	0	1730	0.00329254	4.29423
	3	15141	35	205	0.0135394			339840	8	8171	0.0240437	0.563117	11a	1	133150	26408	3596	0.0270071		2	694820	38	2178	0.00313462	8.61575
1 z4a	1	120980	4341	3141	0.025963		3	354850	48	7895	0.0222488	1.16694	12	1	60887	3260	1895	0.0311232		2	694820	38	2178	0.00313462	9.92885
	2	129480	7409	3763	0.0290624		3	354850	48	7895	0.0222488	1.30624		2	156080	19251	3440	0.02204		3	247410	0	4949	0.0200032	1.10182
2 z4	1	39055	6	910	0.0233005		5	327550	135	12031	0.0367303	0.634367	12a	2	186370	25184	2380	0.0127703		3	169060	0	2246	0.0132852	0.961241
	2	47259	19	668	0.0141349		5	327550	135	12031	0.0367303	0.384829	13	1	119250	33546	1175	0.00985325		4	488870	41	7918	0.0161965	0.608355
	3	344510	22841	7251	0.0210473		5	327550	135	12031	0.0367303	0.573023		2	395380	31937	2109	0.00533411		4	488870	41	7918	0.0161965	0.329336
	4	76559	26540	1636	0.0213691		5	327550	135	12031	0.0367303	0.581786	14	1	148350	27398	1286	0.00866869		3	471140	159	2899	0.00615316	1.40882
2 z4a	1	145740	18996	3801	0.0260807		2	325770	32	12191	0.0374221	0.696933		2	167140	17044	1644	0.00983607		3	471140	159	2899	0.00615316	1.59854
3 z4	1	166020	9644	2224	0.013396		3	269040	182	6518	0.0242269	0.552939	15	1	212940	59912	1055	0.00495445		3	477430	782	5217	0.0109273	0.453403
	2	28553	3300	605	0.0211887		3	269040	182	6518	0.0242269	0.874593		2	203180	38183	976	0.00480362		3	477430	782	5217	0.0109273	0.4396
3 z4a	1	192350	5337	3902	0.0202859		3	253000	0	3519	0.0139091	1.45847	16	1	294270	33177	2941	0.00999422		3	533440	1	5557	0.0104173	0.959388
	2	50763	13772	1024	0.0201722		3	253000	0	3519	0.0139091	1.45029		2	276510	35043	2647	0.00957289		3	533440	1	5557	0.0104173	0.918942
4	1	29504	2799	1586	0.0537554		3	337580	102	10895	0.0322738	1.6656	17	1	350040	28121	828	0.00236544		2	421800	46	1302	0.00308677	0.766317
	2	117440	2193	6066	0.0516519		3	337580	102	10895	0.0322738	1.60043	18	1	143850	14431	563	0.0039138		2	321460	0	2669	0.00830274	0.471386
4a	1	26554	1977	1299	0.0489192		3	246340	74	5396	0.0219047	2.23327	18a	1	98342	5785	764	0.00776881		4	280550	45	2975	0.0106042	0.732618
	2	152180	4256	4122	0.0270863		3	246340	74	5396	0.0219047	1.23655		2	58008	9680	1140	0.0196525		4	280550	45	2975	0.0106042	1.85328
5	1	139090	4538	2948	0.0211949		2	248860	79	6704	0.0269388	0.786779
5a	1	103970	574	3275	0.0314995		3	249140	0	5869	0.023557	1.33716
	2	30445	706	533	0.017507		3	249140	0	5869	0.023557	0.743174
6	2	31341	6433	1352	0.0431384		5	250910	0	7401	0.0294966	1.46248
	3	48377	6280	1968	0.0406805		5	250910	0	7401	0.0294966	1.37916
	4	63863	127	1446	0.0226422		5	250910	0	7401	0.0294966	0.76762
7	1	38805	13001	355	0.00914831		3	224350	0	3539	0.0157745	0.579944
	2	187860	13697	2743	0.0146013		3	224350	0	3539	0.0157745	0.925629
7a	1	155880	10799	3066	0.019669		3	201150	15	1511	0.00751181	2.61841
	2	42497	14887	1126	0.026496		3	201150	15	1511	0.00751181	3.52725
8	1	232460	33918	4062	0.017474		2	257570	0	3918	0.0152114	1.14874
8a	1	42656	5229	351	0.00822862		4	209070	0	3124	0.0149424	0.550691
	2	99993	6535	4551	0.0455132		4	209070	0	3124	0.0149424	3.04592
	3	23374	2366	313	0.0133909		4	209070	0	3124	0.0149424	0.896173
9	1	25841	8119	276	0.0106807		4	212400	112	4326	0.0203672	0.524406
	2	58251	3608	1709	0.0293386		4	212400	112	4326	0.0203672	1.44048
	3	108840	202	2581	0.0237137		4	212400	112	4326	0.0203672	1.16431
9a	1	47579	12342	473	0.00994136		3	234730	0	2068	0.00881012	1.1284
	2	136170	3704	1930	0.0141735		3	234730	0	2068	0.00881012	1.60877
10	1	60902	14431	497	0.00816065		5	261140	155	5431	0.0207973	0.39239
	2	98912	4980	934	0.00944274		5	261140	155	5431	0.0207973	0.454037
	3	160310	11718	2431	0.0151644		5	261140	155	5431	0.0207973	0.729152
	4	109330	31685	1916	0.0175249		5	261140	155	5431	0.0207973	0.842655
10a	1	86000	17032	1974	0.0229535		5	296490	135	2415	0.0081453	2.818
	2	184030	16393	1854	0.0100744		5	296490	135	2415	0.0081453	1.23684
	3	48743	11116	664	0.0136225		5	296490	135	2415	0.0081453	1.67243
	4	16208	3970	146	0.0090079		5	296490	135	2415	0.0081453	1.1059
	DMSO 2204 22h		skeletonic cells					ectoderm						Axt0 0205		skeletonic cells					ectoderm
	embryo		Area	green	red	red/area			Area	green	red	red/ area	pmc/ectoderm			Area	green	red	red/ area			Area	green	red	red/ area	pmc/ectoderm
	1	1	336350	5	4794	0.014253		2	221990	0	1126	0.0050723	2.80997	14	1	342890	2782	7250	0.0211438		2	363960	0	12367	0.033979	0.622261
		3	87857	1783	6733	0.0766359		4	170310	0	11900	0.0698726	1.09679	15	1	256450	2575	3343	0.0130357		2	420410	2	4214	0.0100235	1.30051
	2	1	367230	4565	6833	0.0186069		2	200010	0	3982	0.019909	0.934596	16	1	203260	0	4307	0.0211896		2	386760	0	9405	0.0243174	0.871376
	3	1	370820	563	3637	0.00980799		2	322560	5	12536	0.0388641	0.252366	17	1	310000	380	4499	0.0145129		3	226740	0	5458	0.0240716	0.602905
	4	1	265110	0	3470	0.0130889		3	319640	0	9315	0.0291422	0.44914	18	1	175180	681	1187	0.00677589		2	333300	0	10299	0.0309001	0.219284
	5	1	295130	0	5299	0.0179548		2	273890	0	8642	0.0315528	0.56904	18a	1	216290	1	3317	0.0153359		2	262960	0	11958	0.0454746	0.337241
	5a	1	177380	0	3651	0.0205829		2	368540	0	9867	0.0267732	0.768788	19	1	492720	1091	7510	0.0152419		2	619030	0	17869	0.0288661	0.528021
	6	1	136560	0	2903	0.0212581		3	345260	0	7694	0.0222847	0.953932	20	1	330060	2003	6268	0.0189905		2	463080	0	8790	0.0189816	1.00047
		2	146320	2232	1942	0.0132723		3	345260	0	7694	0.0222847	0.595579	20a	1	1298.7	510	1721			2	213030	0	6116
	7	1	257980	1051	8713	0.0337739		2	287320	10	4516	0.0157177	2.14879	21	1	436420	596	7538	0.0172724		2	433670	0	7947	0.018325	0.942557
	7a	1	191160	121	6221	0.0325434		2	300100	0	5812	0.0193669	1.68036	22	1	601060	4822	12231	0.0203491		2	474910	0	18885	0.0397654	0.511727
	12	1	359850	341	2432	0.00675837		2	407310	0	14642	0.035948	0.188004	23	1	96571	0	994	0.0102929		4	353040	0	5950	0.0168536	0.610726
	8	1	387240	1486	7649	0.0197526		2	427880	0	5902	0.0137936	1.43201		2	178320	0	2531	0.0141936		4	353040	0	5950	0.0168536	0.842169
	9	1	341980	1015	4707	0.013764		2	434840	0	5418	0.0124598	1.10467		3	38189	0	376	0.00984577		4	353040	0	5950	0.0168536	0.584193
	10	1	376250	1966	3255	0.00865116		2	325340	0	3210	0.0098666	0.876813	24	1	355680	0	4501	0.0126546		2	356200	0	9216	0.0258731	0.489104
	11	1	371620	1092	5460	0.0146924		2	419420	0	4555	0.0108602	1.35286	25	1	196970	0	5613	0.0284967		2	327700	0	8261	0.025209	1.13042
	13a	2	213250	1121	1738	0.00815006		3	475460	4	6782	0.0142641	0.571369						0.0159554						0.0250898	0.706197	0.706197
						0.0202086						0.0234137	1.04618
	DMSO 080322 22h		skeletonic cells					ectoderm						Axt0 0205		skeletonic cells					ectoderm
	embryo		Area	green	red	red/area			Area	green	red	red/ area	pmc/ectoderm			Area	green	red	red/ area			Area	green	red	red/ area	pmc/ectoderm
	1	1	657580	53671	7239	0.0110085		2	611830	1744	2713	0.00443424	2.48262	13	1	192720	1369	450	0.00233499		2	346930	0	5735	0.0165307	0.141252
	1a	1	573880	19427	9085	0.0158308		2	703480	2735	2926	0.00415932	3.80611	14	1	378590	283	2758	0.00728493		2	448910	0	6378	0.0142077	0.512743
	3	1	624780	59042	5382	0.00861423		2	532930	1015	4697	0.00881354	0.977386	15	1	202080	23	690	0.00341449		3	263740	0	2120	0.00803822	0.424782
	5	1	495150	67283	4952	0.010001		2	581890	1792	3611	0.00620564	1.6116		2	158430	1082	1082	0.00682951		3	263740	0	2120	0.00803822	0.84963
	6	1	625510	53103	8117	0.0129766		2	375050	710	2577	0.00687108	1.88858	16	1	151440	0	109	0.000719757		3	248120	0	119	0.000479607	1.50072
	7	1	263770	17312	136	0.000515601		2	402530	2550	719	0.0017862	0.288658		2	76937	0	4	5.19906e-05		3	248120	0	119	0.000479607	0.108403
	7a	1	290730	8062	2173	0.00747429		2	366740	178	3137	0.00855374	0.873803	17	1	331220	0	4480	0.0135258		2	319750	0	4476	0.0139984	0.966233
	8	1	445540	43437	8985	0.0201665		2	494220	737	6513	0.0131783	1.53028	18	1	526240	45726	7510	0.0142711		2	645400	0	7611	0.0117927	1.21016
	8a	1	220820	7679	7936	0.0359388		2	446740	146	6978	0.0156198	2.30084	19	1	328450	21784	3117	0.00949003		2	409780	519	4906	0.0119723	0.792667
	9	1	426580	34853	6963	0.0163228		2	460420	1004	4402	0.00956084	1.70726	20	1	339850	38263	5911	0.017393		2	474090	1448	6985	0.0147335	1.18051
	9a	1	435590	38701	6508	0.0149407		2	511750	186	5382	0.0105169	1.42064	21	1	401820	32154	9754	0.0242746		2	481600	50	11385	0.02364	1.02684
	10	1	315200	4717	7418	0.0235343		2	414610	28	2900	0.00699452	3.36467	22	1	186650	17345	4770	0.0255559		3	623140	16	6963	0.0111741	2.28707
	11	1	284750	28314	3931	0.0138051		2	595500	828	5604	0.00941058	1.46698		2	138620	23393	2333	0.0168302		3	623140	16	6963	0.0111741	1.50618
	12	1	483240	49167	4106	0.00849681		2	406170	1141	2076	0.00511116	1.6624	23	1	258680	38473	5410	0.0209139		3	382990	84	4358	0.0113789	1.83795
	12a	1	333150	24381	16468	0.0494312		2	485650	382	6836	0.014076	3.51174		2	320210	27009	4690	0.0146466		3	382990	84	4358	0.0113789	1.28718
													1.92624	24	1	141010	5915	455	0.00322672		3	328040	84	1231	0.00375259	0.859865
															2	153040	22567	403	0.0026333		3	328040	84	1231	0.00375259	0.701728
														25	1	375490	21316	1725	0.004594		2	600460	381	6708	0.0111714	0.411227
																										0.978064
