# Supplementary material for: ROCK and the actomyosin network control biomineral growth and morphology during sea urchin skeletogenesis
Source: eLife. 2024 Apr 4;12:RP89080. doi: 10.7554/eLife.89080 (PMC10994658; doi:10.7554/eLife.89080)
Supplement: Figure 2—source data 1. [file elife-89080-fig2-data1.xlsx]

## Sheet: 11.03
11.3.2020
maso 1	1.1 mM	46h						maso ATG	0.8 mM	48h	random	44h
normal	delayed-with	delayed-branched	normal -branched	skeleton loss	skeleton-loss-sick		TOTAL	normal	delayed- with		normal	delayed	sick
17	20	4	1	6	6		54	8	1		27	4	2
0.314815	0.37037	0.0740741	0.0185185	0.111111	0.111111
05.03.2020
normal	delayed-with				skeleton-loss-sick			normal
6	2				6

## Sheet: Fig 2E data set
18.03	Normal	Reduced skeleton	Branched Skeleton	No skeleton	Extra spicule	total		43908	Normal	Reduced skeleton	Branched Skeleton	No skeleton	Extra spicule
ROCK trans	17	14	6	0	0	37		ROCK trans	45.9459	37.8378	16.2162	0	0	100
ROCK ATG	13	6	0	0	0	19		ROCK ATG	68.4211	31.5789	0	0	0	100
Random	33	0	0	0	0	33		Random	100	0	0	0	0	100
43970	900um
19.05	Normal	Reduced skeleton	Branched Skeleton	No skeleton	Extra spicule	total		43970	Normal	Reduced skeleton	Branched Skeleton	No skeleton	Extra spicule
ROCK trans	10	10	6	0	0	26		ROCK trans	38.4615	38.4615	23.0769	0	0	100
Random	27	2	0	0	0	29		Random	93.1034	6.89655	0	0	0	100
2.06	900um
43984	Normal	Reduced skeleton	Branched Skeleton	No skeleton	Extra spicule	total		43984	Normal	Reduced skeleton	Branched Skeleton	No skeleton	Extra spicule		*****
ROCK trans	21	6	3	0	0	30		ROCK trans	70	20	10	0	0	100
ROCK ATG	21	3	0	0	0	24		ROCK ATG	87.5	12.5	0	0	0	100
Random	23	5	0	0	0	28		Random	82.1429	17.8571	0	0	0	100
16.06	900um
	Normal	Reduced skeleton	Branched Skeleton	No skeleton	Extra spicule	total		43992	Normal	Reduced skeleton	Branched Skeleton	No skeleton	Extra spicule			stdev	Normal	Reduced skeleton	Branched Skeleton	No skeleton	Extra spicule	*****
ROCK trans	13	16	12	0	0	41		ROCK trans	31.7073	39.0244	29.2683	0	0	100		ROCK trans	7.26995	6.58762	5.741	0	0
ROCK ATG	13	8	0	0	0	21		ROCK ATG	61.9048	38.0952	0	0	0	100		ROCK ATG	6.65077	6.65077	0	0	0
Random	27	4	0	0	0	31		Random	87.0968	12.9032	0	0	0	100		Random	3.40991	3.40991	0	0	0
10.06	900um															stdev	Normal	Reduced skeleton	Branched Skeleton	No skeleton	Extra spicule
	Normal	Reduced skeleton	Branched Skeleton	No skeleton	Extra spicule	total		43998	Normal	Reduced skeleton	Branched Skeleton	No skeleton	Extra spicule			ROCK trans	4.05321	7.01034	4.95951	0	0
ROCK trans	24	5	19	0	0	48		ROCK trans	50	10.4167	39.5833	0	0	100		ROCK ATG	2.86651	2.86651	0	0	0
Random	28	4	0	0	0	32		Random	87.5	12.5	0	0	0	100		Random	3.45693	3.45693	0	0	0
2020-07-28	Normal	Reduced skeleton	Branched Skeleton	No skeleton	Extra spicule				Normal	Arrested skeleton	Branched Skeleton	No skeleton	Extra spicule
ROCK ATG	22	8	0	0	0	30		Average	#1	#5	#4	#6	#7			Average	Normal	Reduced skeleton	Branched Skeleton	No skeleton	Extra spicule
Random	27	6	0	0	0	33		ROCK MASO-2	41.5287	31.4351	27.0362	0	0	100		ROCK trans	40.91	29.59	26.62	1.44	1.44
								ROCK MASO-1	67.8864	32.1136	0	0	0	100		ROCK ATG	63.45	34.05	0	2.5	0
								Random MASO	89.9037	10.0963	0	0	0	100		Random	91.93	8.08	0	0	0
					MASO 2	182		Average	Normal	Reduced skeleton	Branched Skeleton	No skeleton	Extra spicule		****	Average	Normal	Reduced skeleton	Branched Skeleton	No skeleton	Extra spicule
					MASO 1	94		ROCK trans	47.223	29.1481	23.629	0	0	100		ROCK trans	46.736	26.34	23.3	2.48	1.15
					Random	186		ROCK ATG	72.6086	27.3914	0	0	0	100		ROCK ATG	71.47	26.87	0	1.67	0
								Random	89.9686	10.0314	0	0	0	100		Random	89.97	10.03	0	0	0
								44021	Normal	Reduced skeleton	Branched Skeleton	No skeleton	Extra spicule
								ROCK ATG	73.3333	26.6667	0	0	0	100
								Random	81.8182	18.1818	0	0	0	100
