# Supplementary material for: ROCK and the actomyosin network control biomineral growth and morphology during sea urchin skeletogenesis
Source: eLife. 2024 Apr 4;12:RP89080. doi: 10.7554/eLife.89080 (PMC10994658; doi:10.7554/eLife.89080)
Supplement: Figure 2—source data 2. [file elife-89080-fig2-data2.xlsx]

## Sheet: Statistics of Y treatment in em
	Culture F	DMSO	Y0 10uM	Y25 10uM	Y0 30uM	Y20 30uM	Y25 30uM	y0 40uM	y20 40uM	y25 40uM	y0 80uM	y20 80uM	y25 80uM			Culture A	Control	Y0 80uM	Y25 0->80uM	Wash 80uM->0
1	control	32	0	0	0	0	0	0	0	0	0	0	0		1	control	82			47
2	Delayed	0	4	3	0	0	0	0	0	0	0	0	0		2	Delayed				17
3	Branched	0	0	29	0	0	25	0	0	1	0	0	0		3	Branced	0	0	0	0
4	Small spicule ectopic branching	0	28	2	0	28	1	0	5	32	0	0	38		4	split small			68	0
5	Spicule initiation	0	6	0	25	2	0	12	27	0	13	16	0		5	skeleton initiation		40	34	0
6	no skeleton	0	4	0	13	0	0	22	16	0	23	29	0		6	no skeleton		26		0
	total	32	42	34	38	30	26	34	48	33	36	45	38
	Culture G	DMSO	Y0 10uM	Y25 10uM	Y0 30uM	Y20 30uM	Y25 30uM	y0 40uM	y20 40uM	y25 40uM	y0 80uM	y20 80uM	y25 80uM			Culture B	Control	Y0 80uM	Y25 0->80uM	Wash 80uM->0
	control	31	0	0	0	0	0	0	0	0	0	0	0		1	control	102			42
	Delayed	0	0	2	0	0	0	0	0	0	0	0	0		2	Delayed				4
	Branched	0	0	37	0	0	30	0	0	26	0	0	1		3	Branced	0	0	0	0
	Small spicule ectopic branching	0	15	3	0	37	7	0	28	3	0	3	32		4	split small			46	0
	Spicule initiation	0	16	0	23	5	0	12	15	0	2	14	0		5	skeleton initiation		25	15	0
	no skeleton	0	7	0	22	1	0	15	4	0	27	21	0		6	no skeleton		25		0
	total	31	38	42	45	43	37	27	47	29	29	38	33
	Culture H	DMSO	Y0 10uM	Y25 10uM	Y0 30uM	Y20 30uM	Y25 30uM	y0 40uM	y20 40uM	y25 40uM	y0 80uM	y20 80uM	y25 80uM			Culture D	Control	Y0 80uM	Y25 0->80uM	Wash 80uM->0
1	control	30	0	0	0	0	0	0	0	0	0	0	0		1	control	50		2	11
2	Delayed	0	0	4	0	0	0	0	0	0	0	0	0		2	Delayed	1			41
3	Branched	0	0	29	0	0	0	0	0	0	0	0	0		3	Branced	0	0	0	0
4	Small spicule ectopic branching	0	16	0	0	8	40	0	8	36	0	0	19		4	split small			49	0
5	Spicule initiation	0	19	0	9	7	5	1	8	2	3	8	6		5	skeleton initiation		2	2	0
6	no skeleton	0	7	0	28	15	0	31	12	1	26	25	2		6	no skeleton		48		0
	total	30	42	33	37	30	45	32	28	39	29	33	27
	Ave	DMSO	Y0 10uM	Y25 10uM	Y0 30uM	Y20 30uM	Y25 30uM	y0 40uM	y20 40uM	y25 40uM	y0 80uM	y20 80uM	y25 80uM	Wash 80uM		Culture E	Control	Y0 80uM	Y25 0->80uM	Wash 80uM->0
1	control	435	0	0	0	0	0	0	0	0	0	0	4	145	1	control	71		2	29
2	Delayed	3	4	9	0	0	0	0	0	0	0	0	0	123	2	Delayed	2			23
3	Branched	0	0	95	0	0	55	0	0	27	0	0	1	0	3	Branced	0	0	0	0
4	Small spicule ectopic branching	0	59	5	0	73	48	0	41	71	2	3	286	0	4	split small		2	50	0
5	Spicule initiation	0	41	0	57	14	5	25	50	2	123	38	76	0	5	skeleton initiation		32	4	0
6	no skeleton	0	18	0	63	16	0	68	32	1	252	75	2	0	6	no skeleton		18		0
	total	438	122	109	120	103	108	93	123	101	377	116	369	268
																Culture C	Control	Y0 80uM	Y25 0->80uM	Wash 80uM->0
															1	control	37		0	16
															2	Delayed			0	38
	Ave %	DMSO	Y0 10uM	Y25 10uM	Y0 30uM	Y20 30uM	Y25 30uM	y0 40uM	y20 40uM	y25 40uM	y0 80uM	y20 80uM	y25 80uM	Wash 80uM	3	Branced	0	0	0	0
	control	99.3151	0	0	0	0	0	0	0	0	0	0	1.08401	54.1045	4	split small			30	0
	Delayed	0.684932	3.27869	8.25688	0	0	0	0	0	0	0	0	0	45.8955	5	skeleton initiation		6	30	0
	Branched	0	0	87.156	0	0	50.9259	0	0	26.7327	0	0	0.271003	0	6	no skeleton		59	0	0
	Small spicule ectopic branching	0	48.3607	4.58716	0	70.8738	44.4444	0	33.3333	70.297	0.530504	2.58621	77.5068	0
	Spicule initiation	0	33.6066	0	47.5	13.5922	4.62963	26.8817	40.6504	1.9802	32.626	32.7586	20.5962	0
	no skeleton	0	14.7541	0	52.5	15.534	0	73.1183	26.0163	0.990099	66.8435	64.6552	0.542005	0
	stdev	DMSO	Y0 10uM	Y25 10uM	Y0 30uM	Y20 30uM	Y25 30uM	y0 40uM	y20 40uM	y25 40uM	y0 80uM	y20 80uM	y25 80uM	Wash 80uM			Ave	DMSO	y0 80µM	y20 80µM
	control	27.4379	0	0	0	0	0	0	0	0	0	0	1.0328	15.7003		control	#1	99.3151	0	0
	Delayed	0.894427	2.3094	1	0	0	0	0	0	0	0	0	0	15.2742		Delayed	#2	0.684932	0	0
	Branched	0	0	4.6188	0	0	16.0728	0	0	14.7309	0	0	0.377964	0		Branched	#3	0	0	0
	Small spicule ectopic branching	0	7.23418	1.52753	0	14.8436	21	0	12.5033	18.0093	1	1.73205	16.1702	0		Small spicule ectopic branching	#4	0	0.530504	2.58621
	Spicule initiation	0	6.80686	0	8.7178	2.51661	2.88675	6.35085	9.60902	1.1547	15.0232	4.16333	14.645	0		Spicule initiation	#5	0	32.626	32.7586
	no skeleton	0	1.73205	0	7.54983	8.3865	0	8.02081	6.1101	0.57735	14.1724	4	1	0		no skeleton	#6	0	66.8435	64.6552
																	total
	stdev %	DMSO	Y0 10uM	Y25 10uM	Y0 30uM	Y20 30uM	Y25 30uM	y0 40uM	y20 40uM	y25 40uM	y0 80uM	y20 80uM	y25 80uM	Wash 80uM
	control	6.26436	0	0	0	0	0	0	0	0	0	0	0.27989	5.85833
	Delayed	0.204207	1.89295	0.917431	0	0	0	0	0	0	0	0	0	5.69931			stdev %	DMSO	y0 80µM	y20 80uM
	Branched	0	0	4.23743	0	0	14.8822	0	0	14.5851	0	0	0.102429	0			control	6.26436	0	0
	Small spicule ectopic branching	0	5.92965	1.4014	0	14.4113	19.4444	0	10.1653	17.8309	0.265252	1.49315	4.38217	0			Delayed	0.204207	0	0
	Spicule initiation	0	5.57939	0	7.26483	2.44331	2.67292	6.82887	7.81221	1.14327	3.98493	3.58908	3.96884	0			Branched	0	0	0
	no skeleton	0	1.41971	0	6.29153	8.14223	0	8.62452	4.96756	0.571634	3.75926	3.44828	0.271003	0			Small spicule ectopic branching	0	0.265252	1.49315
																	Spicule initiation	0	3.98493	3.58908
																	no skeleton	0	3.75926	3.44828
