# Supplementary material for: ROCK and the actomyosin network control biomineral growth and morphology during sea urchin skeletogenesis
Source: eLife. 2024 Apr 4;12:RP89080. doi: 10.7554/eLife.89080 (PMC10994658; doi:10.7554/eLife.89080)
Supplement: Figure 2—source data 3. [file elife-89080-fig2-data3.xlsx]

## Sheet: Sheet1
Control	ROCK inh. 30µm	ROCK inh. 80µm	ROCK inh. 120µm
92.1556	48.706	37.1728	72.2456
86.0972	92.0891	55.0429	21.8648
17.8527	75.8992	33.1484	60.3493
55.2937	46.1992	45.2239	26.9804
37.4978	83.131	34.4569	13.1955
81.1231	59.0947	129.37	37.7341
120.668	180.276	46.3819	65.063
43.6238	95.9352	76.1011	25.0486
116.857	39.0663	103.191	47.4735
61.6532	75.9234	5.6858	24.5011
88.4812	86.0742	91.2793	56.8943
190.006	76.7994	59.2109	21.0288
82.9997	35.0096	73.7842	66.0833
75.6973	93.1076	83.7245	62.1428
62.464	38.3922	78.8237	56.1566
46.7847	41.703	116.859	30.7762
213.085	29.8194	3.0529	40.4983
81.3138	64.067	24.5751	29.9521
90.6584	28.959	3.7531	22.0444
128.304	95.2093	22.1934	9.081
98.8084	51.314	3.4171	36.0049
63.923	47.1033	92.1281	89.601
53.1329	70.7521	52.6779	29.5433
120.052	69.8392	83.0992	59.7757
142.076	32.0031	107.97	61.1709
122.093	92.613	81.1064	30.8111
87.4663	48.3131	6.5678	45.5869
114.263	52.1333	67.3599	74.6916
87.6413	105.273	3.2789	40.2757
53.9875	79.96	78.3787	28.0721
108.135	30.7468	51.547	41.8222
59.9799	45.9087	60.1273	110.715
37.7313	67.2675	8.1781	20.4983
35.6531	167.851	36.6536	63.421
73.3901	99.8518	9.1992	30.5205
68.9861	67.0476	23.4156	44.9441
130.502	17.1083	17.0282	26.8653
112.562	22.9498	4.2664	45.0357
123.824	10.709	44.415	57.7844
144.939	80.1668	14.2683	54.5768
142.032	22.4181	61.7185	30.2565
196.269	30.8737	222.344	18.3982
86.1231	63.105	87.4868	6.9483
75.8151	62.1877	13.435	29.6873
86.4018	80.6382	108.907	47.3214
118.021	104.779	22.3947	28.1607
84.8568	47.7644	27.8886	49.9624
64.0491	174.008	127.912	19.7832
139.986	67.0828	107.833	27.1645
101.332	67.171	78.1314	47.1386
55.9319	46.3128	16.737	25.7562
37.9729	44.7313	3.8535	19.7384
49.7319	54.8302	61.5928	55.89
32.0983	81.072	20.9872	39.4833
107.452	21.479	62.9623	53.9116
78.4858	88.3581	4.881	30.1912
133.765	75.1432	66.1777	33.3434
75.299	87.2531	77.0197	49.5152
150.493	90.1181	8.5183	39.5681
202.697	23.1691	20.6996	71.1303
18.6009	102.065	47.6605	68.4055
92.6094	76.5071	39.4102	89.4951
109.454	52.7993	33.645	40.9799
91.6887	14.3589	71.6245	18.9501
101.495	15.5111	82.2378	15.0065
59.1714	17.5464	63.2763	113.391
55.8507	43.5713	119.541	17.2591
88.4566	48.1668	82.176	45.9753
129.548	89.6754	99.2307	44.5752
56.1625	21.0058	33.7561	30.2413
95.0948	19.5025	28.2403	75.8642
51.2823	85.5528	62.1039	38.7351
65.7643	124.446	39.6281	44.2474
162.734	51.9802	113.516	31.7066
87.9362	93.0095	12.1476	90.9405
86.2524	105.944	17.6738	33.2054
54.4574	95.0351	93.6859	37.9787
59.4334	67.3606	46.3461	47.1992
154.292	75.4499	54.3869	35.0064
163.244	43.8187	103.51	50.3341
57.8112	25.1542	15.8712
314.377	7.3343	188.95
255.539	10.1023	40.7357
162.875	22.1357	106.084
48.6879	25.9944	8.4985
138.692	46.7757	114.291
95.7389	42.9893	30.3708
135.796	86.9607	85.387
44.7668	21.7394	6.0939
139.368	41.0195	40.671
227.366	5.4082	19.0718
60.7605	32.8394	45.6139
78.2626	53.3683	58.0876
112.367	140.42	88.5042
136.611	32.4013	4.5574
182.48	63.1305	65.8715
197.599	36.4273	44.8889
86.5274	104.629	31.0429
146.267	43.5819	82.9798
174.156	18.0328	13.3221
176.368	3.9398	124.08
33.7133	98.4147	49.0519
181.588	3.6197	58.3446
190.002	14.9233	33.9475
47.0232	55.5513	25.1444
27.0211		14.8766
107.342		15.6035
79.992		20.1835
71.559		108.712
120.652		8.3828
109.915		26.9296
49.2647		24.7422
116.19		37.5278
106.179		46.3398
79.8794		75.1862
80.3671		54.9695
24.5732		65.8325
118.296		117.446
18.1434		28.1111
55.9978		54.5988
75.676		36.8626
130.507		47.2751
39.4015
206.26
165.699
148.763
51.4368
171.831
111.797
27.4916
106.652
15.6966
26.0227
21.0294
94.8514
110.435
141.386
115.58
138.416
60.7218
83.0247
175.059
65.6384
158.754
59.7504
77.8557
139.727
198.031
128.497
144.739
121.716
100.266
159.587
167.578
7.6906
44.4686
165.405
90.1223
11.7856
136.097
91.3541
73.3435
125.765
34.8335
139.418
5.169
138.78
136.52
108.109
170.004
60.2256
98.1694
88.6024
9.1285
67.5497
39.7567
99.4211
178.924
143.798
75.7287
163.126
96.6939
156.663
160.002
88.0207
96.211
198.427
162.831
153.897
59.0663
40.4942
90.2906
32.4153
31.2534
48.3068
91.5799
63.7162
95.3443
65.257
172.861
123.066
195.986
130.684
139.626
53.3965
89.0311
75.6798
96.1688
38.5303
78.6845
60.6484
55.7845
123.314
78.6711
54.1893
41.0913
64.4192
31.2198
123.041
51.7905
63.4635
77.4152
45.444
103.566
123.32
212.497
35.5689
136.395
34.3528
61.3658
68.6462
75.4625
47.6972
114.854
32.2483
47.3327
101.426
105.026
55.9902
21.9598
55.5254
58.1504
47.6709
56.7649
54.6062
29.102
68.5963
69.3026
99.0383
133.606
134.57
101.868
100.9
107.082
99.4353
32.3114
99.8885
122.752
41.8449
38.8443
107.276
112.783
81.899
119.969
80.4669
33.1697
34.6662
33.6608
75.012
96.5337
118.812
112.387
59.2689
115.32
49.2187
