# Supplementary material for: ROCK and the actomyosin network control biomineral growth and morphology during sea urchin skeletogenesis
Source: eLife. 2024 Apr 4;12:RP89080. doi: 10.7554/eLife.89080 (PMC10994658; doi:10.7554/eLife.89080)
Supplement: Figure 3—source data 1. [file elife-89080-fig3-data1.xlsx]

## Sheet: cntrl_72_MPI_th
Control_72h_LofTh_102.csv.gz	Control_72h_LofTh_51.csv.gz	Control_72h_LofTh_216.csv.gz	Control_72h_LofTh_229.csv.gz	Control_72h_LofTh_242.csv.gz	Control_72h_LofTh_204.csv.gz	Control_72h_LofTh_89.csv.gz	Control_72h_LofTh_127.csv.gz	Control_72h_LofTh_153.csv.gz	Control_72h_LofTh_38.csv.gz	Control_72h_LofTh_165.csv.gz	Control_72h_LofTh_191.csv.gz	Control_72h_LofTh_63.csv.gz	Control_72h_LofTh_255.csv.gz	Control_72h_LofTh_12.csv.gz	Control_72h_LofTh_76.csv.gz	Control_72h_LofTh_114.csv.gz	Control_72h_LofTh_178.csv.gz	Control_72h_LofTh_140.csv.gz	Control_72h_LofTh_25.csv.gz
2.63856	2.04382	2.63856	1.66877	2.63856	2.04382	2.8904	4.41516	2.63856	3.33754	2.63856	2.63856	3.54	3.33754	3.33754	2.8904	3.33754	2.04382	2.63856	9.51346
2.63856	2.63856	2.63856	1.66877	2.63856	1.66877	3.33754	4.86526	2.63856	3.54	3.33754	2.8904	3.54	3.54	3.54	2.63856	3.33754	1.66877	2.63856	10.0819
2.63856	2.63856	2.63856	1.66877	2.04382	2.63856	2.8904	4.41516	2.63856	4.08764	2.63856	3.33754	4.08764	3.33754	3.54	2.63856	3.33754	2.04382	2.63856	9.65872
2.04382	2.63856	2.63856	2.04382	2.04382	2.63856	3.33754	4.72	2.63856	4.25455	2.63856	2.63856	3.91362	2.8904	3.54	2.63856	3.54	1.66877	2.36	9.80182
1.66877	2.63856	3.33754	2.63856	2.63856	2.8904	3.54	4.72	2.63856	4.25455	3.73149	2.8904	3.91362	3.33754	4.08764	3.33754	3.73149	2.04382	2.63856	9.21609
2.63856	2.63856	2.63856	2.63856	2.8904	2.8904	3.33754	4.72	2.63856	4.86526	3.73149	2.8904	4.41516	2.63856	3.33754	3.33754	3.91362	2.04382	2.63856	9.73053
2.8904	2.63856	2.63856	2.04382	2.8904	2.8904	3.33754	4.72	2.8904	5.1435	4.72	3.33754	4.25455	2.36	3.54	3.33754	4.72	2.04382	2.8904	9.51346
3.33754	2.63856	2.63856	1.66877	2.8904	2.8904	3.33754	4.86526	2.63856	5.27712	4.86526	2.63856	4.25455	2.63856	4.08764	2.63856	5.27712	2.04382	2.63856	9.51346
4.25455	2.63856	2.63856	2.04382	2.63856	2.8904	4.08764	5.27712	2.8904	5.27712	4.25455	2.8904	5.00632	2.36	3.33754	2.63856	5.40744	2.04382	2.8904	8.9088
4.08764	2.63856	2.63856	2.04382	2.04382	3.33754	3.54	5.9	3.33754	5.27712	5.27712	3.33754	5.40744	3.33754	3.54	2.63856	5.40744	2.63856	2.63856	9.06375
4.25455	2.63856	2.63856	1.66877	1.66877	2.8904	4.25455	5.9	3.33754	5.27712	5.00632	3.33754	5.7808	3.54	4.08764	3.33754	5.00632	2.63856	2.8904	8.98661
4.25455	2.63856	3.33754	1.66877	2.8904	3.33754	4.25455	5.9	3.33754	5.7808	5.7808	3.33754	5.7808	3.73149	3.54	2.63856	5.7808	2.63856	2.63856	9.29133
3.91362	2.63856	3.33754	2.04382	2.8904	2.36	4.41516	6.01684	3.33754	5.7808	5.40744	3.33754	6.01684	3.73149	3.33754	2.63856	6.01684	2.8904	2.63856	8.67119
3.73149	2.63856	3.33754	2.04382	2.63856	2.63856	4.25455	6.13146	3.54	6.01684	5.27712	3.33754	6.01684	4.08764	3.54	2.63856	6.35449	3.33754	2.8904	8.98661
3.73149	2.63856	3.54	1.66877	2.8904	2.8904	3.73149	6.46313	3.33754	6.46313	5.27712	2.8904	5.7808	4.41516	3.54	2.63856	6.98097	2.63856	3.33754	8.98661
3.91362	3.33754	3.54	1.18	2.63856	2.8904	5.1435	6.46313	3.33754	6.35449	5.9	3.33754	5.9	4.41516	3.33754	2.63856	7.27401	3.33754	3.33754	8.59053
3.73149	2.8904	3.73149	1.66877	3.33754	2.63856	4.86526	6.77858	3.33754	6.35449	5.9	3.33754	5.9	4.08764	3.54	2.63856	6.46313	2.63856	3.54	8.83031
4.25455	2.63856	3.91362	1.66877	2.8904	2.8904	4.86526	6.88052	3.33754	6.67509	5.9	3.33754	6.67509	3.54	3.33754	2.63856	6.67509	2.8904	3.33754	9.51346
4.86526	2.63856	3.33754	2.04382	2.63856	2.8904	5.9	6.98097	3.33754	7.27401	6.46313	3.33754	6.67509	3.91362	3.33754	2.63856	7.55569	2.63856	3.33754	8.83031
4.86526	2.63856	3.33754	2.04382	2.8904	2.8904	5.9	7.08	3.54	6.88052	6.67509	3.33754	6.77858	2.8904	3.33754	2.63856	7.64727	2.8904	3.33754	9.06375
4.86526	2.63856	3.33754	2.63856	2.8904	3.33754	6.35449	7.08	3.33754	7.55569	6.67509	3.33754	7.17766	2.63856	4.25455	3.33754	7.91568	2.63856	3.33754	8.34386
5.00632	2.63856	3.54	2.04382	2.8904	2.63856	6.35449	7.08	3.54	8.34386	6.35449	3.54	6.35449	2.63856	4.25455	3.33754	8.26	2.63856	3.54	9.29133
5.7808	2.63856	3.91362	2.8904	2.8904	2.8904	7.27401	6.88052	3.54	7.46298	5.9	3.33754	6.88052	2.63856	4.25455	3.33754	7.64727	2.8904	3.33754	8.59053
5.9	2.63856	3.54	2.63856	3.33754	3.33754	7.46298	6.88052	3.54	7.91568	5.9	3.33754	7.17766	3.33754	4.08764	3.33754	7.91568	2.63856	3.33754	9.44
6.01684	2.63856	3.73149	3.33754	3.54	2.8904	7.17766	6.88052	3.54	8.26	5.00632	3.73149	7.64727	2.63856	4.25455	3.33754	8.26	3.33754	3.33754	8.83031
6.01684	2.63856	3.91362	3.33754	3.54	3.33754	7.46298	7.55569	3.54	8.34386	5.00632	3.33754	7.55569	2.63856	4.08764	3.33754	8.26	3.33754	3.33754	9.21609
6.67509	2.63856	3.33754	2.63856	3.33754	2.8904	7.91568	7.55569	3.73149	8.59053	4.25455	2.63856	7.91568	2.63856	3.33754	2.63856	8.00315	3.33754	3.54	8.42689
6.67509	2.8904	3.33754	2.63856	3.33754	3.33754	8.5091	7.55569	3.91362	8.9088	6.88052	3.33754	8.5091	2.63856	3.33754	2.63856	8.26	3.33754	2.8904	8.67119
6.88052	2.63856	3.33754	2.8904	3.54	3.33754	8.42689	7.82723	4.08764	9.06375	6.46313	2.8904	8.67119	3.33754	4.25455	3.54	8.42689	2.63856	3.33754	8.5091
7.08	2.63856	3.54	2.8904	3.54	3.54	7.91568	7.91568	3.54	8.59053	5.9	3.54	8.42689	3.54	4.25455	2.63856	8.59053	2.8904	3.54	8.83031
7.27401	2.63856	3.33754	2.8904	3.54	3.33754	7.91568	7.91568	3.73149	8.9088	5.9	2.8904	8.9088	3.73149	4.25455	2.63856	8.83031	2.8904	3.33754	8.26
7.08	2.63856	3.33754	2.63856	3.54	2.8904	8.9088	7.91568	4.25455	9.21609	5.9	3.54	9.29133	3.54	4.25455	2.63856	8.67119	3.33754	3.73149	8.5091
7.55569	2.63856	3.54	2.63856	3.33754	2.8904	9.51346	7.91568	3.73149	9.21609	5.9	3.33754	9.51346	3.54	4.25455	2.8904	9.06375	2.63856	3.33754	7.91568
7.55569	2.63856	3.54	2.8904	3.54	2.8904	9.58637	7.91568	3.91362	9.21609	6.98097	3.54	8.83031	3.54	4.25455	3.33754	9.21609	2.8904	3.54	8.34386
8.26	2.63856	3.33754	2.63856	3.54	2.63856	9.58637	7.82723	4.08764	9.21609	7.46298	2.8904	9.06375	2.8904	4.25455	3.33754	9.21609	3.33754	3.73149	8.26
8.26	2.63856	3.54	3.33754	3.54	2.8904	9.58637	7.91568	3.91362	9.21609	6.98097	3.73149	9.21609	2.8904	4.25455	3.33754	8.9088	2.8904	3.33754	7.64727
8.34386	2.63856	4.08764	2.63856	3.54	2.8904	10.0819	8.00315	3.54	9.06375	7.55569	2.63856	9.58637	3.54	4.25455	2.63856	9.21609	3.33754	3.33754	7.91568
8.42689	2.63856	3.54	2.63856	3.54	3.33754	9.80182	8.26	3.91362	9.51346	7.55569	2.8904	9.80182	3.73149	4.25455	2.63856	9.21609	2.63856	3.91362	7.91568
8.5091	2.63856	3.54	2.8904	3.54	3.33754	10.0819	8.26	3.91362	9.51346	7.55569	3.33754	9.51346	3.73149	4.25455	2.63856	9.21609	3.33754	3.73149	8.26
8.34386	3.33754	3.54	2.8904	3.91362	3.33754	10.0126	7.91568	3.54	9.51346	7.91568	2.8904	9.80182	4.25455	4.25455	2.63856	9.21609	2.8904	3.33754	7.64727
8.26	3.33754	3.54	2.8904	3.54	3.54	10.1507	7.64727	4.25455	9.58637	7.55569	3.54	9.51346	4.41516	3.33754	2.04382	9.06375	3.33754	3.91362	7.82723
8.34386	2.8904	3.73149	2.8904	3.54	3.33754	10.1507	8.34386	3.91362	10.0819	8.34386	2.8904	9.80182	4.41516	3.33754	2.63856	9.29133	2.8904	3.91362	7.82723
8.42689	3.33754	2.8904	2.63856	3.33754	2.63856	10.0126	8.26	4.08764	10.2191	8.26	3.54	10.0126	4.41516	3.33754	2.04382	9.29133	3.33754	3.54	7.91568
8.67119	3.33754	3.33754	2.8904	3.54	2.8904	10.6854	7.91568	3.54	10.4215	8.5091	2.8904	10.1507	4.41516	3.54	3.33754	9.06375	2.8904	3.73149	7.64727
8.59053	3.33754	3.33754	2.8904	3.91362	3.33754	10.3545	7.64727	4.08764	10.5542	8.26	3.73149	9.80182	4.41516	3.33754	2.63856	9.06375	3.33754	3.73149	7.55569
8.67119	3.33754	3.54	2.8904	3.54	2.8904	10.8149	8.26	3.54	10.0126	8.34386	2.63856	10.1507	4.41516	3.54	3.33754	8.67119	3.33754	3.73149	7.73778
8.00315	3.33754	3.54	2.63856	3.54	3.33754	10.62	8.00315	3.91362	10.3545	8.83031	2.8904	10.2191	4.25455	3.54	2.63856	9.29133	3.33754	3.54	6.77858
8.26	3.33754	3.33754	3.33754	3.54	2.8904	10.62	7.91568	3.91362	10.5542	8.98661	3.73149	9.58637	3.91362	3.33754	2.63856	9.21609	3.33754	2.63856	7.64727
8.83031	3.33754	3.54	2.8904	3.54	3.33754	10.4215	7.91568	4.08764	10.5542	9.21609	2.8904	10.0126	3.91362	3.33754	2.8904	8.83031	2.63856	2.8904	7.27401
8.83031	3.33754	3.73149	2.63856	3.33754	3.33754	11.1321	7.64727	3.91362	10.5542	8.83031	3.73149	10.1507	4.08764	3.54	2.63856	8.5091	3.33754	3.33754	7.27401
8.83031	3.33754	2.8904	3.33754	3.54	3.54	10.5542	7.55569	3.54	10.287	9.29133	2.8904	10.0126	3.91362	3.33754	2.36	8.83031	3.33754	2.36	7.27401
9.06375	3.33754	3.33754	2.8904	3.54	3.54	10.8149	7.64727	3.73149	10.0819	8.98661	3.54	9.80182	4.86526	3.33754	2.63856	9.06375	3.33754	2.63856	7.27401
9.06375	3.33754	3.54	2.8904	3.54	3.54	10.3545	8.83031	3.91362	10.0126	9.21609	2.8904	10.1507	4.41516	3.54	2.8904	9.21609	3.33754	2.63856	7.08
8.83031	3.33754	3.33754	2.63856	3.33754	3.54	10.8149	8.98661	3.54	10.0819	9.21609	2.8904	10.3545	4.86526	3.54	2.63856	9.06375	3.33754	2.63856	7.27401
8.83031	3.33754	3.54	3.33754	3.54	3.33754	11.1321	9.06375	3.54	10.287	9.58637	4.25455	10.4215	5.40744	3.33754	2.8904	8.83031	3.33754	2.8904	7.64727
8.83031	2.8904	3.54	3.33754	3.33754	3.33754	10.5542	9.29133	3.91362	10.287	9.65872	3.33754	10.6854	5.1435	3.54	3.33754	9.06375	2.04382	2.63856	7.27401
8.83031	3.33754	3.33754	2.8904	4.08764	3.33754	11.1321	9.44	3.54	10.0819	9.51346	3.73149	10.6854	5.40744	3.54	3.33754	9.21609	3.33754	3.33754	7.64727
8.83031	3.33754	3.73149	2.8904	4.08764	3.33754	10.5542	9.51346	3.54	10.0126	9.21609	3.33754	10.62	4.86526	3.33754	3.33754	8.83031	2.04382	2.63856	7.27401
8.83031	3.33754	3.33754	2.63856	3.73149	2.63856	10.8149	9.58637	3.73149	10.0126	9.29133	3.33754	10.4215	5.00632	3.33754	3.33754	9.06375	3.33754	2.8904	7.08
8.59053	3.33754	3.54	3.33754	3.54	2.8904	11.1321	9.73053	3.91362	10.5542	9.87259	3.33754	10.5542	3.91362	3.33754	3.33754	9.06375	1.66877	3.33754	7.08
8.59053	2.8904	3.73149	2.63856	3.54	3.33754	10.62	9.73053	4.08764	10.8791	9.51346	3.73149	10.62	4.41516	3.33754	3.33754	8.67119	3.33754	3.54	6.98097
8.42689	3.33754	3.91362	2.8904	3.91362	2.36	11.1321	10.62	3.54	10.8791	9.65872	3.33754	10.6854	4.86526	3.33754	3.33754	8.34386	2.04382	3.54	7.27401
7.64727	3.33754	4.25455	3.33754	3.54	2.36	11.1321	10.5542	3.73149	10.8791	9.80182	3.73149	10.62	5.00632	3.33754	3.33754	8.34386	3.54	3.54	6.77858
7.91568	3.33754	4.25455	2.8904	3.33754	2.63856	3.33754	10.2191	4.25455	10.8791	9.29133	2.8904	10.3545	4.41516	4.72	3.33754	8.34386	2.63856	3.73149	3.54
7.64727	3.33754	4.41516	2.8904	3.54	3.33754	3.54	10.1507	4.08764	10.8149	9.51346	2.8904	10.1507	3.73149	4.25455	3.33754	8.34386	3.33754	3.91362	5.27712
7.91568	3.33754	4.41516	2.63856	3.54	2.63856	2.8904	10.0819	3.91362	10.62	9.21609	3.54	11.1321	3.73149	4.41516	3.33754	8.34386	2.36	3.91362	6.13146
7.91568	3.33754	4.25455	3.33754	3.54	3.54	3.33754	11.1321	4.08764	10.0819	9.21609	2.8904	10.9429	7.08	4.86526	2.63856	8.34386	3.33754	3.54	6.98097
7.64727	2.8904	4.41516	2.63856	3.54	3.33754	2.8904	11.1321	3.54	10.0126	8.67119	3.91362	10.8791	3.73149	4.86526	2.63856	8.26	2.63856	3.91362	3.54
7.91568	2.63856	4.86526	2.8904	3.54	3.54	2.63856	11.1321	3.54	10.0126	9.21609	3.33754	11.4405	3.73149	4.41516	2.63856	8.26	3.54	3.54	3.91362
7.91568	3.33754	4.86526	3.33754	3.54	3.33754	2.63856	11.1321	3.73149	10.0126	8.67119	3.73149	11.6217	4.41516	4.25455	2.63856	8.34386	3.33754	3.73149	4.41516
8.26	3.33754	4.86526	2.8904	3.54	3.91362	2.63856	11.1321	3.91362	10.0126	9.21609	2.8904	11.6814	5.00632	4.25455	3.33754	8.42689	3.33754	3.54	7.27401
7.64727	3.33754	4.25455	2.8904	3.54	3.33754	2.63856	12.0914	3.54	10.0126	8.59053	3.91362	10.8149	4.86526	4.25455	3.33754	8.34386	2.63856	3.54	7.46298
7.64727	3.33754	4.08764	2.63856	3.33754	3.33754	11.1321	11.3795	3.54	10.0126	8.5091	3.33754	11.1321	4.86526	4.25455	3.33754	7.91568	3.54	3.54	6.77858
7.64727	3.33754	3.91362	2.8904	3.33754	3.54	11.1321	12.0337	3.54	10.0126	8.26	4.25455	11.6217	6.01684	4.25455	2.8904	7.55569	2.63856	3.54	6.77858
7.55569	3.33754	3.91362	2.8904	3.54	3.54	10.8149	11.9174	4.08764	10.0126	8.59053	3.33754	11.6217	6.88052	3.33754	3.33754	7.55569	3.33754	3.54	6.98097
7.64727	3.33754	4.25455	2.8904	3.54	3.91362	3.33754	11.7409	3.54	10.0126	8.42689	3.73149	11.6814	7.91568	3.33754	3.33754	8.26	3.33754	3.91362	7.27401
7.64727	3.33754	4.25455	2.8904	3.54	2.63856	2.8904	12.5436	3.73149	10.0126	8.26	3.33754	11.4405	7.55569	3.54	3.33754	7.91568	3.33754	3.54	7.27401
7.55569	3.33754	4.25455	2.8904	3.33754	2.8904	2.8904	12.5436	3.33754	9.51346	8.26	4.08764	10.8791	8.42689	3.33754	3.33754	7.73778	2.63856	3.54	6.67509
7.64727	3.33754	3.33754	2.8904	2.8904	3.54	2.63856	12.3759	3.54	9.29133	7.73778	3.33754	10.8791	8.00315	3.33754	3.54	8.00315	3.33754	4.25455	7.27401
7.55569	3.33754	3.33754	2.8904	2.8904	3.54	2.63856	12.206	3.54	9.21609	8.26	3.73149	11.6814	8.67119	3.54	3.33754	7.91568	2.8904	3.54	6.77858
7.55569	3.33754	3.91362	2.8904	3.33754	3.54	11.1321	12.0914	3.54	9.21609	8.26	2.8904	11.6814	9.06375	3.33754	3.33754	7.73778	3.33754	3.33754	6.88052
7.55569	3.33754	3.54	2.63856	3.54	4.08764	3.33754	12.206	3.54	9.21609	8.26	3.54	11.6814	9.06375	3.33754	3.33754	7.64727	2.36	3.91362	6.88052
7.73778	3.33754	3.54	3.33754	3.33754	3.54	3.73149	12.3759	3.73149	9.21609	8.26	3.73149	10.9429	9.29133	3.33754	3.33754	7.91568	3.33754	3.54	6.46313
7.91568	3.33754	2.8904	2.8904	3.54	3.33754	3.54	12.3759	3.54	9.21609	7.91568	3.33754	11.1321	9.51346	3.33754	2.63856	7.91568	2.63856	3.33754	6.77858
7.55569	2.8904	3.33754	2.8904	3.54	3.54	3.33754	12.1488	3.54	9.21609	8.00315	2.8904	11.1321	9.58637	3.33754	3.33754	7.64727	3.33754	3.73149	6.35449
7.27401	3.33754	3.33754	3.33754	3.54	3.54	3.33754	11.6814	3.54	9.21609	7.73778	4.08764	11.2565	10.1507	3.33754	2.63856	7.55569	3.33754	3.33754	7.08
7.27401	3.33754	3.33754	2.8904	3.54	3.33754	3.33754	11.6814	3.91362	8.98661	8.26	3.33754	11.6814	9.58637	3.33754	3.54	7.55569	3.54	4.08764	6.77858
7.55569	3.33754	3.33754	2.8904	3.33754	2.36	4.25455	10.62	4.08764	8.98661	8.26	3.73149	10.9429	10.1507	3.33754	2.63856	7.55569	2.63856	3.54	6.88052
7.27401	3.33754	3.33754	2.8904	3.54	2.8904	4.25455	10.8791	3.54	8.98661	8.26	3.33754	11.1321	9.73053	3.33754	3.33754	7.55569	3.73149	3.54	6.77858
7.27401	3.33754	3.54	2.8904	3.54	2.8904	4.25455	10.8791	3.91362	9.21609	7.82723	3.54	10.0819	9.80182	4.86526	2.8904	7.55569	2.8904	3.54	6.98097
7.08	3.33754	3.54	2.8904	3.91362	3.33754	3.91362	10.9429	3.54	9.21609	8.26	3.33754	10.1507	9.65872	5.00632	3.33754	7.27401	3.54	4.25455	6.77858
7.27401	3.33754	3.54	2.8904	3.54	2.8904	10.62	11.1321	4.25455	9.21609	8.26	4.08764	10.6854	10.1507	5.1435	2.63856	7.27401	3.33754	3.73149	6.77858
7.08	3.33754	3.33754	2.8904	3.54	2.8904	10.6854	10.8791	3.54	8.98661	7.64727	3.33754	10.287	9.58637	5.40744	3.54	7.55569	3.54	4.41516	6.35449
6.77858	3.33754	3.54	2.8904	3.54	3.33754	10.6854	10.6854	3.54	8.98661	7.55569	3.73149	10.62	10.1507	4.86526	2.8904	7.55569	2.8904	4.41516	6.77858
6.67509	3.33754	3.54	2.8904	3.54	3.33754	10.8149	10.62	3.54	8.98661	7.55569	3.33754	10.9429	10.2191	4.72	3.33754	7.55569	3.54	4.41516	6.88052
6.67509	3.33754	3.33754	2.8904	4.08764	4.08764	10.62	10.62	3.73149	8.9088	7.55569	4.08764	10.3545	9.87259	4.41516	2.63856	7.27401	3.33754	4.72	6.35449
6.67509	3.33754	3.33754	2.8904	4.08764	3.54	3.54	10.287	3.33754	8.67119	7.91568	2.63856	10.0126	10.1507	4.25455	3.54	6.98097	3.54	4.25455	6.01684
6.46313	3.33754	3.33754	2.63856	3.73149	3.91362	3.33754	10.0819	3.54	8.42689	7.82723	3.33754	10.0126	10.1507	4.25455	3.33754	6.98097	3.33754	4.25455	6.35449
6.67509	3.33754	3.33754	2.8904	3.54	3.33754	3.54	9.65872	3.73149	8.42689	7.91568	3.91362	10.3545	9.87259	3.54	3.33754	7.27401	3.73149	4.25455	6.77858
5.9	3.33754	3.33754	2.8904	3.54	3.54	3.33754	9.29133	3.91362	8.59053	7.73778	3.33754	10.62	9.73053	3.54	3.33754	7.08	3.33754	3.54	6.01684
6.01684	3.33754	3.33754	2.63856	3.54	3.91362	3.54	8.9088	3.54	8.59053	7.82723	3.54	10.1507	9.87259	4.08764	3.54	6.77858	3.54	3.33754	6.46313
6.35449	3.33754	3.33754	2.8904	4.41516	3.54	3.54	9.65872	3.33754	7.27401	7.82723	3.33754	9.51346	10.1507	3.33754	3.33754	6.77858	2.8904	3.54	6.35449
6.35449	3.33754	3.54	2.63856	4.08764	4.08764	3.33754	9.21609	3.73149	8.34386	7.82723	3.91362	9.29133	9.65872	3.33754	3.33754	6.77858	3.54	2.63856	6.35449
6.35449	3.33754	3.33754	2.8904	4.41516	3.33754	3.33754	8.98661	3.73149	8.26	7.46298	3.33754	9.80182	9.58637	3.33754	3.33754	7.27401	3.33754	3.33754	6.35449
6.35449	3.33754	3.33754	2.63856	4.41516	3.54	3.33754	8.98661	3.54	8.00315	7.82723	3.73149	10.0126	9.58637	3.54	3.33754	7.27401	3.73149	2.8904	6.35449
6.67509	3.33754	3.33754	2.63856	4.41516	3.54	3.54	8.98661	3.54	7.91568	7.27401	3.33754	9.21609	9.58637	3.54	3.33754	7.08	3.54	3.33754	5.9
6.35449	3.33754	3.33754	2.8904	4.41516	4.08764	3.33754	8.9088	3.73149	7.91568	8.26	3.54	9.21609	9.51346	3.33754	3.54	6.98097	3.91362	2.8904	6.35449
6.67509	3.33754	3.33754	2.8904	4.25455	3.54	3.33754	8.59053	4.08764	8.34386	7.82723	3.33754	9.29133	9.65872	3.54	3.33754	6.77858	2.63856	2.8904	6.01684
6.35449	3.33754	3.33754	2.63856	4.72	4.08764	2.8904	8.34386	3.54	8.26	7.27401	3.54	9.44	9.58637	3.54	3.54	6.98097	3.73149	2.8904	6.35449
6.01684	3.33754	3.33754	2.8904	4.41516	3.54	11.1321	8.26	3.54	8.34386	8.26	3.54	9.44	9.51346	3.33754	3.33754	6.35449	2.8904	3.33754	6.67509
6.35449	3.33754	3.33754	2.8904	4.41516	3.33754	10.8149	8.26	3.54	8.34386	7.55569	3.54	9.51346	8.9088	3.54	3.33754	6.35449	3.54	3.33754	6.35449
6.35449	3.33754	3.33754	2.63856	4.72	3.54	3.33754	7.91568	3.73149	8.34386	8.5091	3.33754	8.98661	9.06375	3.54	3.33754	6.35449	3.33754	4.08764	6.35449
6.01684	3.33754	3.54	2.63856	4.72	3.33754	3.54	7.91568	3.91362	8.34386	8.00315	3.33754	9.06375	9.29133	3.33754	3.33754	6.77858	4.25455	3.54	6.35449
6.01684	3.33754	3.33754	2.8904	2.63856	3.33754	3.33754	7.82723	4.08764	8.26	7.46298	3.33754	8.26	9.29133	3.33754	2.63856	6.67509	3.54	3.54	6.77858
6.35449	3.33754	3.33754	2.8904	4.72	3.33754	3.33754	7.55569	4.08764	8.34386	8.42689	3.54	9.06375	8.59053	3.54	3.54	6.67509	4.25455	3.54	6.35449
6.35449	3.33754	3.54	2.63856	2.8904	3.33754	3.33754	7.91568	3.91362	8.34386	8.5091	3.54	9.29133	8.9088	4.08764	3.33754	6.67509	2.8904	3.54	6.77858
6.01684	3.33754	3.33754	2.8904	4.72	2.8904	3.33754	7.64727	3.54	8.34386	2.63856	3.54	9.06375	9.06375	3.54	3.54	6.67509	4.41516	3.33754	6.35449
5.7808	3.33754	3.33754	2.8904	2.8904	2.63856	3.33754	7.27401	3.91362	8.34386	3.54	2.8904	9.29133	9.29133	3.33754	3.33754	6.67509	3.33754	3.54	6.35449
5.9	3.33754	2.63856	2.8904	2.63856	3.33754	10.9429	7.55569	4.08764	9.06375	3.54	3.33754	9.29133	8.34386	3.54	3.54	6.35449	4.25455	3.54	6.01684
5.9	3.33754	3.33754	2.63856	4.72	3.33754	11.1321	7.55569	3.54	9.29133	3.54	3.33754	8.42689	8.42689	3.54	3.33754	6.35449	3.54	3.54	6.46313
5.9	3.33754	3.33754	2.8904	2.8904	3.33754	10.8149	7.08	3.54	9.51346	3.54	3.73149	8.67119	8.67119	3.33754	3.73149	6.67509	3.54	3.54	6.67509
5.9	3.33754	3.54	2.8904	3.91362	2.8904	3.33754	7.08	3.73149	8.5091	3.54	3.54	8.9088	8.9088	5.00632	3.33754	6.67509	2.8904	3.33754	6.35449
5.9	3.33754	3.33754	3.33754	2.63856	3.54	2.8904	7.08	3.91362	8.59053	3.54	3.54	9.06375	8.67119	5.40744	3.54	6.35449	4.72	3.33754	6.98097
6.01684	2.8904	3.33754	2.63856	4.41516	3.33754	3.33754	7.08	3.54	8.83031	3.54	3.33754	9.29133	9.06375	4.86526	3.33754	6.67509	3.33754	3.54	6.35449
5.9	2.8904	3.73149	3.54	2.8904	3.91362	3.33754	7.55569	3.73149	8.98661	3.33754	3.73149	8.59053	8.34386	4.86526	3.54	6.67509	4.41516	3.54	6.67509
5.7808	3.33754	3.91362	2.8904	4.41516	3.54	3.33754	7.55569	3.54	9.29133	3.33754	3.33754	8.83031	8.59053	4.86526	2.8904	6.67509	3.33754	3.33754	6.77858
5.7808	3.33754	3.91362	3.33754	3.33754	3.33754	3.33754	7.55569	3.54	9.29133	8.5091	3.54	7.91568	8.59053	3.33754	3.33754	6.67509	4.86526	3.54	6.77858
5.9	3.54	3.91362	3.54	3.54	3.54	3.33754	7.55569	3.54	9.21609	8.00315	2.63856	8.9088	8.83031	3.33754	3.33754	6.67509	3.33754	3.33754	6.35449
5.7808	3.33754	3.91362	2.63856	4.41516	3.54	10.9429	7.46298	3.54	8.98661	2.8904	3.33754	9.06375	8.26	3.54	3.73149	6.35449	4.72	3.33754	6.67509
5.7808	3.33754	2.8904	3.33754	3.33754	4.08764	3.54	7.17766	3.54	8.98661	2.8904	3.73149	9.06375	8.34386	3.33754	2.8904	6.35449	3.33754	3.33754	6.01684
5.7808	3.54	3.33754	3.54	4.72	3.54	2.8904	7.17766	3.73149	7.91568	3.33754	3.33754	8.26	7.82723	3.33754	3.33754	6.35449	4.72	3.33754	6.77858
5.7808	3.33754	3.33754	3.54	3.33754	4.08764	3.33754	7.08	3.54	8.9088	3.33754	3.54	8.67119	8.26	3.33754	3.33754	6.35449	2.36	3.33754	6.35449
5.7808	3.33754	3.33754	3.54	4.41516	3.54	3.54	7.08	3.73149	8.98661	2.8904	3.33754	8.9088	8.26	3.33754	3.54	6.35449	4.72	3.33754	6.67509
5.7808	3.33754	3.54	3.33754	2.8904	3.91362	3.33754	6.35449	3.54	8.5091	3.33754	3.54	8.26	7.73778	3.91362	3.33754	6.35449	2.36	3.54	6.01684
5.7808	3.33754	3.33754	2.8904	4.72	4.08764	3.54	6.46313	3.33754	8.42689	2.8904	2.8904	8.67119	7.55569	4.41516	3.54	6.35449	4.72	4.08764	6.35449
5.7808	2.8904	3.73149	3.33754	3.33754	3.54	3.33754	6.46313	3.54	8.5091	2.8904	3.33754	8.9088	7.73778	4.25455	3.33754	5.9	2.04382	3.54	5.9
5.9	3.33754	3.91362	2.8904	3.33754	4.08764	3.33754	7.08	3.33754	8.00315	2.8904	3.73149	8.26	7.73778	4.25455	3.54	5.9	4.72	3.54	6.35449
5.7808	3.33754	3.54	3.33754	3.91362	3.54	2.8904	6.98097	3.54	8.26	2.8904	3.33754	8.9088	7.08	4.25455	2.63856	5.9	2.04382	4.08764	6.01684
5.7808	3.33754	3.91362	3.33754	3.54	4.08764	2.63856	6.77858	3.54	8.34386	3.33754	3.54	9.06375	7.17766	3.91362	3.73149	6.01684	4.72	3.54	6.35449
6.01684	3.33754	3.91362	3.54	4.41516	3.54	10.0126	6.01684	3.33754	8.34386	2.8904	3.33754	8.34386	7.27401	4.86526	3.33754	5.53469	2.04382	3.73149	6.01684
6.01684	3.33754	3.91362	3.33754	3.33754	3.54	10.6854	5.9	3.33754	8.34386	2.8904	3.54	8.26	7.27401	4.86526	3.91362	5.1435	4.86526	3.33754	6.35449
5.7808	3.33754	3.33754	3.54	3.33754	3.33754	10.9429	5.9	3.54	7.82723	2.8904	3.33754	8.26	6.88052	5.00632	3.33754	5.00632	2.63856	3.33754	6.01684
5.9	3.33754	3.33754	3.54	3.91362	4.08764	11.1321	5.9	3.54	7.91568	2.8904	3.73149	8.26	6.77858	5.00632	3.73149	5.7808	4.25455	3.33754	6.35449
6.35449	2.63856	3.33754	2.8904	3.54	3.54	10.6854	5.9	3.54	7.91568	2.8904	3.33754	8.26	7.08	4.86526	3.33754	5.7808	2.63856	3.54	5.7808
6.35449	3.33754	3.33754	3.54	4.41516	4.08764	3.54	5.9	3.54	8.00315	2.8904	3.33754	8.26	6.77858	4.86526	3.54	5.9	4.72	3.54	5.7808
6.35449	3.33754	3.33754	3.54	3.54	4.08764	4.08764	5.9	3.73149	8.26	3.33754	3.33754	8.26	6.13146	4.86526	3.33754	5.9	2.36	3.54	6.35449
5.9	3.54	3.33754	3.54	3.54	3.54	3.91362	5.7808	3.54	7.91568	2.8904	3.54	8.34386	6.46313	4.41516	3.54	5.7808	3.73149	3.73149	5.7808
5.9	3.54	3.33754	3.54	3.73149	4.08764	2.8904	5.9	3.54	8.00315	3.33754	3.33754	8.26	6.46313	4.08764	3.33754	5.7808	2.36	3.33754	6.35449
5.7808	3.33754	3.33754	3.54	3.33754	3.54	3.33754	5.9	3.33754	8.26	2.8904	3.54	7.91568	6.77858	3.54	3.33754	5.7808	4.25455	3.54	6.01684
5.7808	3.33754	3.73149	3.54	3.54	4.08764	3.33754	5.9	3.33754	7.91568	3.33754	2.8904	7.82723	5.9	3.33754	2.63856	5.7808	2.36	3.33754	5.9
6.01684	3.33754	3.91362	3.54	3.91362	4.08764	3.33754	6.01684	3.54	7.91568	2.8904	3.33754	8.00315	6.13146	3.33754	4.08764	5.7808	4.25455	3.91362	5.7808
6.35449	3.33754	2.8904	3.33754	3.33754	4.08764	10.9429	6.01684	3.54	8.00315	2.8904	3.54	7.27401	6.35449	3.33754	2.8904	5.53469	2.63856	3.54	6.35449
6.35449	3.33754	3.33754	3.33754	4.72	3.54	10.62	5.9	3.54	8.26	3.33754	2.8904	8.00315	6.46313	3.33754	3.73149	5.1435	3.91362	4.08764	5.9
5.9	3.33754	3.33754	3.33754	3.33754	4.08764	3.33754	5.40744	3.33754	8.00315	2.8904	3.33754	8.26	6.35449	3.33754	3.33754	5.7808	2.8904	3.33754	5.9
5.9	3.33754	3.54	3.54	3.91362	3.54	4.08764	5.7808	3.33754	7.91568	2.63856	3.33754	8.26	6.01684	3.33754	3.54	5.40744	3.91362	3.33754	5.7808
6.01684	3.33754	3.54	3.54	2.8904	4.08764	4.08764	5.9	3.54	7.46298	3.33754	3.54	7.91568	6.35449	3.73149	3.33754	5.53469	3.54	4.08764	5.9
5.9	3.33754	3.73149	3.33754	3.33754	4.08764	4.25455	5.9	3.33754	7.91568	3.54	3.33754	7.64727	6.46313	3.73149	3.54	5.40744	4.25455	3.33754	5.7808
5.27712	3.33754	3.33754	3.33754	4.72	4.08764	3.54	5.9	3.54	7.91568	2.8904	3.54	7.91568	6.13146	3.91362	3.33754	5.27712	3.91362	3.33754	5.9
5.9	3.54	3.33754	3.54	3.54	4.25455	3.33754	5.7808	3.54	7.91568	3.33754	2.8904	7.91568	6.01684	4.25455	3.54	5.40744	3.73149	3.33754	5.9
5.9	3.33754	3.33754	3.54	3.54	4.41516	3.33754	5.40744	3.54	6.98097	3.33754	3.54	7.08	6.35449	4.25455	3.33754	5.40744	3.54	3.33754	5.7808
5.7808	2.63856	3.54	3.54	3.91362	4.41516	3.33754	5.9	3.54	7.46298	3.54	3.33754	7.46298	6.35449	4.25455	3.54	5.1435	3.54	2.63856	6.01684
5.53469	3.33754	2.8904	3.91362	3.33754	4.41516	2.63856	5.9	3.33754	7.91568	3.33754	3.54	7.55569	5.9	4.25455	3.33754	5.27712	3.54	2.8904	5.40744
5.00632	3.54	3.33754	3.54	3.33754	4.41516	10.0126	5.9	3.54	7.91568	3.54	3.54	7.27401	5.9	4.25455	3.54	5.1435	3.91362	3.33754	5.7808
5.00632	3.54	4.08764	3.33754	4.41516	4.41516	10.7503	5.9	3.54	7.64727	2.8904	3.54	7.46298	6.01684	4.25455	2.63856	5.00632	3.33754	3.33754	5.9
5.00632	3.33754	4.08764	3.54	3.73149	4.41516	10.5542	5.9	3.33754	7.91568	3.33754	3.54	7.27401	6.35449	4.25455	3.73149	4.86526	3.73149	2.8904	6.01684
5.00632	3.33754	3.54	4.08764	4.86526	4.41516	3.33754	5.9	3.33754	7.91568	3.33754	3.54	7.55569	6.01684	4.25455	2.8904	4.86526	2.8904	3.54	5.7808
5.00632	3.33754	3.54	3.33754	3.54	4.86526	3.73149	5.9	3.33754	7.82723	3.33754	3.54	7.46298	5.27712	4.25455	3.54	4.86526	3.33754	2.63856	5.9
5.00632	3.33754	3.33754	3.54	4.41516	4.25455	3.54	5.9	3.54	7.46298	8.5091	3.54	7.27401	5.9	3.33754	3.33754	5.40744	3.54	3.54	6.01684
5.00632	3.33754	4.08764	4.08764	3.33754	4.41516	3.91362	5.9	3.33754	7.55569	3.33754	2.8904	7.55569	6.01684	2.8904	3.54	5.40744	3.54	2.63856	5.9
5.27712	3.33754	4.08764	3.91362	3.33754	4.86526	3.54	5.9	3.54	7.64727	3.54	3.54	7.55569	5.9	2.8904	3.33754	5.00632	3.33754	2.63856	5.7808
5.27712	2.63856	3.91362	4.25455	4.72	4.86526	3.54	5.7808	3.33754	7.91568	3.54	3.73149	7.08	5.7808	2.63856	3.54	5.00632	3.33754	2.63856	5.7808
5.1435	2.63856	3.54	4.25455	3.54	4.25455	3.33754	5.00632	3.54	7.91568	3.33754	3.33754	7.08	5.9	3.33754	3.33754	5.1435	2.8904	3.33754	5.7808
5.00632	3.33754	3.33754	3.91362	4.72	4.41516	3.33754	4.86526	3.54	7.55569	3.54	3.54	7.08	6.01684	2.63856	3.54	5.1435	3.54	2.8904	5.9
5.27712	3.33754	3.33754	4.86526	3.33754	4.86526	9.80182	4.86526	3.54	7.55569	3.33754	3.33754	7.17766	5.7808	3.33754	3.33754	4.86526	3.33754	2.63856	5.7808
5.7808	3.33754	3.91362	4.25455	3.33754	4.86526	10.6854	5.7808	3.33754	7.55569	2.63856	3.54	6.67509	5.7808	3.33754	2.8904	5.27712	3.54	3.33754	5.9
5.7808	3.33754	3.54	4.25455	3.54	4.41516	10.8149	5.9	3.54	7.55569	2.8904	2.8904	6.46313	5.40744	3.91362	3.54	5.7808	2.63856	2.63856	5.7808
5.53469	3.33754	3.91362	4.25455	4.41516	4.86526	2.36	5.9	3.33754	7.08	3.33754	2.8904	6.67509	5.9	4.25455	3.33754	5.7808	3.54	2.63856	6.01684
2.63856	3.33754	4.08764	4.25455	3.91362	4.41516	3.54	5.9	3.33754	7.08	3.33754	3.73149	6.67509	5.7808	4.25455	3.54	5.53469	3.33754	3.33754	5.27712
2.8904	3.54	3.54	4.25455	3.54	4.86526	2.63856	5.7808	3.54	7.17766	3.54	3.33754	6.67509	5.40744	3.91362	3.33754	5.1435	3.33754	2.63856	5.7808
3.33754	3.33754	3.54	4.25455	3.91362	4.25455	3.33754	5.9	3.54	7.46298	3.54	3.54	5.9	5.27712	2.63856	3.91362	5.00632	3.33754	3.33754	5.7808
3.54	2.8904	4.08764	5.00632	3.33754	4.41516	3.33754	5.7808	3.73149	7.55569	3.54	3.33754	6.01684	5.7808	2.63856	3.33754	5.00632	3.54	3.54	5.7808
3.33754	2.63856	3.54	5.00632	4.41516	4.86526	3.33754	5.7808	3.33754	6.67509	3.33754	3.91362	6.13146	5.9	2.8904	4.08764	5.40744	2.63856	2.63856	5.7808
2.8904	2.8904	4.08764	4.41516	3.73149	4.25455	3.54	5.9	3.54	6.67509	3.54	3.33754	6.46313	5.53469	2.63856	3.33754	5.1435	3.33754	2.36	5.7808
2.8904	3.54	4.08764	4.72	4.86526	4.41516	3.33754	5.9	3.54	7.08	8.5091	3.73149	6.67509	5.27712	2.8904	4.41516	5.1435	2.8904	4.08764	5.7808
3.33754	3.33754	4.08764	5.27712	3.54	5.00632	10.1507	4.72	3.54	7.27401	7.64727	3.33754	6.67509	5.53469	2.63856	3.54	5.00632	3.73149	2.63856	5.40744
2.8904	3.33754	4.08764	5.7808	3.54	4.41516	10.5542	4.72	3.54	7.46298	3.33754	3.33754	6.67509	5.9	2.8904	3.33754	4.86526	3.33754	2.63856	5.7808
2.8904	3.54	3.54	5.1435	5.00632	1.18	1.18	5.9	3.91362	6.35449	2.8904	3.54	6.67509	5.53469	2.63856	4.25455	5.00632	3.33754	3.73149	5.7808
2.8904	2.63856	4.08764	4.72	3.91362	1.18	1.18	4.72	4.08764	6.35449	3.33754	3.33754	5.9	5.1435	3.73149	3.33754	4.86526	2.63856	2.63856	5.9
3.33754	2.8904	3.54	4.41516	3.54	1.18	3.54	4.72	3.91362	6.35449	3.33754	4.25455	6.01684	5.7808	3.91362	3.73149	4.86526	3.73149	2.63856	5.7808
2.8904	3.54	4.08764	4.41516	5.00632	5.00632	3.54	5.53469	4.08764	6.46313	2.8904	3.33754	6.13146	5.53469	4.25455	3.73149	5.00632	3.33754	3.54	5.00632
3.33754	3.33754	4.25455	4.25455	3.33754	4.86526	3.54	4.72	4.25455	6.77858	3.33754	3.73149	6.46313	5.1435	3.91362	3.33754	5.00632	3.33754	2.63856	5.27712
3.33754	3.33754	4.25455	3.91362	2.8904	1.66877	3.54	4.72	4.86526	6.67509	3.33754	3.33754	6.67509	4.72	3.91362	3.54	4.86526	3.54	2.63856	5.9
3.54	3.54	4.08764	3.91362	5.1435	2.04382	3.73149	5.00632	4.41516	6.77858	2.04382	4.08764	6.67509	5.00632	3.73149	3.33754	4.25455	3.33754	3.33754	5.9
3.33754	3.54	4.25455	3.73149	3.73149	3.33754	3.91362	5.40744	4.41516	6.88052	1.66877	3.33754	6.67509	5.53469	3.73149	3.54	4.25455	3.33754	3.54	4.72
5.1435	3.33754	4.08764	3.73149	5.9	3.33754	3.73149	5.00632	4.86526	6.35449	1.66877	3.73149	6.01684	5.53469	3.54	3.33754	4.41516	3.33754	2.63856	4.72
2.04382	3.33754	4.25455	3.73149	3.33754	3.33754	3.91362	4.86526	5.00632	6.88052	8.00315	3.33754	6.13146	5.40744	2.63856	3.54	4.25455	3.54	2.63856	4.72
2.8904	3.54	3.91362	3.54	3.54	3.33754	4.25455	4.86526	4.41516	6.77858	2.8904	3.73149	6.35449	5.7808	2.36	3.33754	4.41516	3.54	3.54	4.72
2.8904	3.73149	4.08764	3.54	5.9	3.33754	4.41516	5.00632	4.86526	6.67509	3.33754	2.8904	6.46313	5.1435	2.36	4.08764	4.41516	3.54	2.8904	4.72
2.8904	2.8904	4.08764	3.54	5.00632	3.33754	4.72	5.00632	5.00632	6.67509	3.33754	2.8904	6.77858	5.53469	2.36	3.33754	4.41516	3.54	3.33754	4.86526
3.33754	3.33754	3.33754	3.54	3.73149	3.33754	3.91362	5.00632	5.1435	6.67509	2.8904	3.91362	6.46313	5.7808	2.36	3.54	4.25455	3.54	3.54	5.00632
2.8904	3.54	3.54	3.54	5.27712	3.33754	4.25455	5.40744	5.00632	6.67509	3.33754	3.33754	6.77858	5.40744	2.63856	3.33754	4.41516	3.33754	3.33754	5.53469
2.63856	2.63856	3.91362	3.54	4.86526	3.33754	3.33754	5.40744	5.00632	6.35449	2.8904	3.73149	6.35449	5.00632	2.63856	3.91362	4.41516	2.8904	2.63856	5.7808
2.8904	2.8904	4.25455	3.73149	5.27712	3.33754	2.63856	5.00632	5.00632	6.35449	2.63856	3.33754	6.77858	5.1435	2.8904	3.33754	4.25455	3.33754	2.36	5.00632
5.40744	3.54	4.08764	5.00632	5.1435	3.33754	2.63856	4.86526	5.00632	6.35449	2.8904	3.91362	6.35449	5.1435	2.63856	3.91362	4.25455	3.54	3.54	4.86526
5.53469	3.33754	4.86526	4.41516	4.25455	5.00632	2.36	5.00632	4.25455	5.9	3.54	3.33754	6.46313	5.40744	2.63856	3.33754	4.25455	3.33754	2.8904	5.27712
1.66877	3.54	4.86526	4.25455	3.33754	2.63856	2.36	5.40744	4.72	5.9	2.8904	3.73149	6.35449	4.86526	3.91362	4.08764	4.41516	3.54	3.33754	5.1435
1.66877	3.73149	4.41516	4.41516	3.33754	1.66877	2.04382	5.27712	4.25455	6.67509	8.26	3.33754	6.01684	5.27712	4.25455	3.33754	4.25455	3.33754	3.33754	5.53469
1.18	3.54	3.91362	4.25455	4.72	2.04382	2.04382	4.86526	4.25455	6.35449	7.55569	3.91362	6.01684	5.1435	3.91362	4.08764	4.25455	3.33754	2.8904	5.00632
1.66877	3.54	4.25455	4.41516	5.1435	3.33754	2.04382	5.00632	3.54	6.01684	2.8904	2.8904	6.13146	4.86526	3.73149	4.41516	4.41516	3.33754	3.54	5.27712
3.33754	3.91362	4.25455	4.86526	4.86526	3.33754	2.63856	5.40744	3.54	5.9	2.8904	3.54	6.35449	5.27712	2.63856	3.33754	4.41516	3.54	3.33754	5.00632
3.33754	2.8904	3.73149	4.86526	3.33754	3.33754	2.8904	5.40744	3.73149	5.9	2.8904	3.73149	5.9	5.53469	2.63856	4.08764	4.41516	3.33754	2.8904	5.00632
2.8904	3.54	3.54	4.41516	3.33754	3.33754	2.8904	5.1435	3.54	5.9	3.33754	3.33754	5.9	5.1435	2.63856	3.33754	4.86526	3.54	3.54	5.00632
3.33754	3.54	4.86526	4.41516	2.8904	3.33754	2.8904	5.00632	3.73149	6.46313	2.63856	4.25455	5.9	5.27712	2.63856	4.41516	4.86526	3.33754	3.33754	5.1435
5.1435	3.54	4.08764	4.25455	4.72	3.33754	3.33754	5.27712	3.33754	6.35449	3.33754	2.8904	5.9	5.40744	2.04382	3.54	4.41516	3.33754	2.8904	5.00632
2.63856	3.54	3.73149	4.41516	4.86526	2.8904	3.54	5.1435	3.73149	6.01684	8.34386	3.54	5.9	4.72	2.63856	4.08764	4.25455	3.33754	3.54	5.40744
2.04382	3.33754	3.54	4.25455	5.00632	3.33754	3.54	5.00632	3.33754	6.01684	8.26	3.73149	6.01684	4.86526	2.63856	4.41516	4.25455	3.33754	2.8904	5.40744
1.66877	3.73149	3.54	4.86526	4.86526	3.33754	3.33754	5.00632	3.73149	6.35449	3.33754	3.33754	5.7808	5.27712	4.41516	3.73149	4.25455	3.54	2.8904	5.27712
3.33754	3.54	4.08764	4.41516	3.73149	3.33754	3.54	5.40744	3.33754	6.67509	3.54	3.54	5.9	5.40744	4.25455	4.41516	4.41516	3.54	2.8904	5.00632
2.8904	3.91362	4.25455	4.86526	3.54	4.08764	3.54	4.86526	3.73149	6.46313	3.54	3.91362	5.27712	5.00632	3.73149	3.33754	4.41516	3.33754	3.73149	5.40744
3.33754	3.91362	3.91362	4.41516	4.86526	3.54	3.33754	4.86526	3.33754	6.13146	2.8904	3.33754	5.00632	5.00632	3.54	4.86526	4.41516	3.33754	2.63856	4.86526
4.86526	3.54	3.73149	4.25455	5.00632	3.54	9.73053	4.72	3.73149	6.01684	3.33754	3.54	5.40744	5.1435	3.54	3.33754	4.41516	3.33754	3.33754	5.40744
3.33754	3.54	3.73149	4.86526	4.86526	3.54	10.0819	5.00632	3.33754	6.01684	2.8904	3.91362	5.7808	5.40744	4.41516	4.25455	4.25455	2.8904	3.33754	4.86526
3.33754	3.54	4.41516	4.86526	4.41516	3.91362	10.5542	5.00632	3.73149	5.9	2.63856	3.33754	5.9	5.53469	4.72	3.33754	4.41516	3.33754	3.33754	5.00632
2.63856	3.54	3.91362	4.41516	3.73149	3.54	3.54	5.00632	3.33754	6.01684	3.33754	3.91362	5.9	5.1435	4.25455	4.72	4.41516	3.54	3.54	5.1435
3.33754	3.54	3.54	4.41516	3.54	3.33754	3.54	4.86526	3.73149	6.13146	3.54	2.8904	5.53469	5.40744	3.73149	3.33754	4.86526	3.33754	3.54	4.72
2.8904	4.08764	4.08764	4.25455	4.72	3.91362	3.54	5.00632	3.33754	6.01684	2.8904	3.33754	5.9	5.53469	3.54	4.25455	4.25455	3.54	3.33754	4.86526
3.33754	3.73149	4.41516	4.41516	4.86526	3.54	3.54	5.40744	3.33754	6.01684	3.33754	3.73149	5.9	5.00632	4.41516	3.54	4.41516	3.33754	3.33754	5.00632
3.33754	4.08764	3.91362	4.86526	3.91362	3.33754	3.54	5.40744	3.73149	5.9	3.33754	3.33754	5.00632	4.25455	3.91362	4.41516	4.41516	3.33754	3.33754	5.00632
3.33754	3.91362	4.08764	4.41516	3.33754	3.33754	3.91362	5.27712	3.33754	5.9	8.34386	4.25455	5.40744	5.00632	3.73149	3.33754	4.86526	3.33754	2.8904	4.72
5.1435	4.08764	4.41516	4.25455	4.41516	3.73149	1.18	5.27712	3.73149	5.9	3.33754	2.63856	5.40744	5.00632	3.73149	3.91362	3.91362	3.54	3.33754	4.72
3.33754	3.91362	3.91362	4.86526	5.40744	3.54	3.33754	5.00632	3.33754	6.01684	2.8904	3.33754	5.7808	5.1435	3.54	3.33754	4.41516	3.54	3.54	4.86526
3.33754	3.54	3.54	4.86526	3.73149	3.33754	1.18	5.40744	3.73149	6.01684	3.33754	1.18	5.00632	4.86526	4.25455	3.91362	3.73149	3.54	3.33754	5.00632
3.33754	4.08764	3.91362	4.41516	4.25455	3.54	1.18	5.7808	3.33754	5.9	2.63856	3.73149	4.72	4.86526	4.25455	3.33754	4.25455	3.33754	3.54	4.72
3.33754	3.73149	4.25455	4.41516	5.7808	3.33754	1.66877	5.9	3.33754	5.9	3.33754	3.33754	4.72	4.86526	3.73149	3.73149	3.91362	2.8904	3.54	4.72
2.8904	3.33754	3.73149	4.72	5.40744	3.73149	1.18	5.7808	3.73149	5.7808	3.33754	3.91362	4.86526	4.25455	4.41516	3.33754	4.41516	3.33754	3.33754	4.86526
3.54	4.25455	4.41516	4.08764	3.91362	3.54	1.18	5.27712	3.33754	6.01684	8.5091	2.8904	5.00632	3.54	4.41516	3.54	4.25455	3.54	3.33754	5.00632
3.33754	3.73149	3.91362	4.86526	4.72	3.33754	1.18	5.7808	3.73149	5.9	8.34386	3.33754	5.1435	3.54	4.25455	3.73149	4.25455	3.33754	2.04382	4.86526
3.54	4.25455	3.54	4.41516	3.33754	3.33754	1.66877	4.86526	3.33754	6.01684	3.54	1.18	4.72	3.54	4.41516	3.54	3.91362	3.54	3.73149	5.00632
5.00632	4.25455	3.54	4.86526	5.40744	3.54	1.18	5.40744	3.73149	6.01684	3.54	4.25455	4.72	3.33754	4.41516	3.73149	4.08764	3.33754	3.33754	5.00632
3.33754	3.73149	4.25455	4.41516	4.41516	5.00632	3.33754	5.7808	4.25455	5.9	3.54	3.33754	4.72	3.54	4.41516	3.91362	3.91362	2.8904	2.04382	4.72
3.73149	4.08764	3.73149	3.91362	4.41516	3.73149	1.18	4.72	3.73149	5.9	3.54	3.91362	4.86526	4.08764	4.25455	3.54	4.25455	3.73149	2.04382	4.86526
3.73149	3.91362	4.25455	3.33754	3.91362	3.54	3.54	4.72	4.25455	5.9	2.8904	3.33754	5.40744	3.91362	4.41516	4.86526	3.91362	3.54	1.66877	4.86526
3.73149	3.73149	3.91362	4.41516	3.54	2.36	3.54	4.72	3.91362	5.7808	3.33754	4.25455	5.9	3.91362	4.08764	4.08764	4.41516	3.54	3.33754	4.86526
5.1435	3.91362	4.25455	4.86526	5.27712	1.18	3.54	4.72	4.25455	5.9	2.63856	3.33754	4.72	3.73149	4.41516	4.86526	3.91362	3.54	3.54	4.86526
3.33754	4.25455	4.08764	3.91362	3.73149	1.18	3.54	4.72	3.91362	5.9	3.33754	3.54	4.72	3.54	4.08764	3.91362	3.54	3.33754	3.33754	5.00632
3.91362	3.91362	3.91362	2.8904	3.73149	1.18	3.54	4.72	3.73149	5.9	3.33754	4.25455	4.72	3.54	4.41516	5.00632	3.91362	3.33754	2.63856	5.00632
4.25455	3.91362	4.41516	3.33754	3.33754	2.63856	3.33754	4.72	4.25455	5.9	7.82723	3.73149	4.72	3.33754	4.25455	3.54	3.91362	3.54	2.04382	5.00632
4.08764	4.41516	4.41516	2.63856	5.00632	3.33754	3.54	4.72	4.25455	5.27712	8.26	3.91362	4.72	3.54	3.54	5.00632	4.08764	3.54	2.63856	5.40744
5.1435	3.54	3.73149	4.86526	4.25455	4.25455	3.54	5.9	4.25455	5.7808	2.63856	3.33754	4.72	3.54	3.91362	3.33754	3.91362	3.54	3.33754	5.40744
3.33754	3.73149	4.25455	4.86526	3.33754	4.25455	3.54	5.9	4.25455	5.9	2.63856	3.33754	4.72	3.33754	3.91362	5.1435	4.08764	3.54	3.54	5.7808
4.25455	3.91362	4.25455	4.41516	3.73149	3.91362	4.08764	5.9	2.8904	5.9	3.33754	4.25455	4.72	3.33754	3.73149	3.54	4.08764	3.33754	2.8904	5.00632
4.41516	3.54	3.73149	4.86526	5.00632	4.25455	4.08764	5.7808	3.33754	5.9	3.54	3.54	4.86526	3.54	3.54	4.72	3.91362	3.54	3.54	4.86526
4.41516	3.54	3.33754	4.25455	4.72	4.25455	4.25455	5.40744	3.33754	4.86526	3.33754	3.33754	5.00632	3.73149	4.72	3.54	3.54	3.73149	2.63856	5.00632
5.1435	3.73149	2.63856	4.25455	3.54	4.08764	3.54	5.00632	4.25455	5.27712	8.00315	3.54	5.1435	3.54	4.41516	4.41516	4.08764	3.33754	2.04382	4.72
2.8904	3.91362	2.8904	2.8904	3.54	4.25455	2.63856	4.72	4.25455	5.9	2.63856	3.91362	5.1435	3.33754	4.41516	4.25455	4.41516	3.54	2.04382	4.72
4.25455	4.25455	2.8904	2.8904	2.8904	4.08764	3.33754	4.72	4.25455	5.9	3.54	3.73149	5.00632	3.33754	4.86526	4.08764	3.73149	3.54	1.66877	4.72
4.25455	3.91362	2.8904	2.63856	5.53469	3.54	3.54	4.72	4.41516	5.9	3.54	3.33754	4.72	3.54	4.41516	4.72	4.08764	3.33754	3.73149	4.86526
4.41516	3.73149	3.33754	2.8904	4.72	4.25455	3.54	4.72	4.72	4.72	3.54	4.25455	4.72	3.33754	4.86526	3.91362	4.08764	3.33754	2.8904	4.86526
5.1435	4.25455	3.54	2.63856	3.73149	4.08764	3.54	4.72	3.33754	4.86526	3.33754	3.54	5.00632	3.33754	4.86526	4.08764	4.41516	3.73149	3.54	5.00632
3.91362	3.91362	3.54	2.63856	2.8904	4.41516	3.54	4.72	2.8904	5.27712	3.33754	3.33754	4.72	3.33754	4.41516	4.41516	4.41516	3.73149	3.91362	4.86526
3.33754	3.54	3.54	4.86526	5.27712	4.08764	3.54	4.72	3.33754	5.00632	8.26	3.33754	4.72	3.33754	4.86526	3.73149	4.86526	3.54	2.63856	5.00632
4.41516	3.33754	3.54	4.41516	4.72	4.25455	3.54	4.72	2.8904	5.00632	7.73778	3.73149	4.86526	5.00632	4.25455	4.08764	4.41516	3.54	2.63856	5.00632
4.41516	3.33754	3.33754	4.41516	3.73149	4.25455	9.73053	5.00632	4.25455	5.7808	7.82723	3.33754	5.00632	4.86526	4.25455	3.73149	4.86526	3.73149	3.73149	4.72
4.25455	4.25455	2.8904	3.91362	3.33754	3.91362	10.0819	5.00632	4.25455	5.9	3.33754	3.33754	5.40744	3.33754	4.41516	4.08764	4.86526	3.33754	3.73149	4.86526
5.1435	3.73149	2.8904	2.8904	4.86526	4.25455	10.1507	4.86526	4.25455	5.9	2.63856	4.25455	5.7808	3.33754	4.25455	4.08764	4.25455	3.73149	4.41516	5.00632
3.91362	3.91362	2.8904	2.8904	4.72	3.91362	4.08764	4.72	4.08764	5.9	2.63856	3.33754	5.1435	4.25455	4.25455	4.08764	3.33754	3.54	2.8904	5.1435
4.41516	4.25455	2.8904	2.63856	5.00632	3.54	4.08764	4.72	2.63856	5.00632	3.33754	3.33754	5.40744	4.25455	4.25455	4.25455	4.72	3.54	2.63856	4.72
4.86526	4.25455	2.8904	2.8904	3.73149	3.33754	4.08764	4.72	3.33754	4.86526	7.55569	3.91362	4.72	4.41516	3.91362	3.54	3.91362	3.33754	2.63856	4.86526
5.00632	4.25455	2.8904	2.63856	3.33754	3.54	3.91362	4.72	2.8904	5.53469	7.27401	2.8904	5.00632	4.72	4.25455	3.54	4.25455	3.91362	5.00632	5.1435
3.91362	3.91362	2.63856	2.63856	4.86526	4.86526	3.91362	4.72	3.91362	5.00632	7.82723	2.63856	5.1435	4.25455	3.73149	4.25455	3.54	3.33754	5.00632	4.86526
4.41516	7.46298	2.63856	4.86526	5.7808	4.41516	3.54	4.72	4.25455	5.00632	2.63856	2.8904	4.72	4.25455	4.25455	3.54	3.54	3.73149	3.33754	5.00632
4.25455	7.91568	4.86526	4.86526	3.73149	4.25455	3.54	4.72	4.08764	5.1435	2.63856	4.25455	5.00632	3.73149	4.41516	3.91362	3.33754	3.54	2.63856	4.86526
4.86526	7.55569	5.00632	4.41516	4.86526	4.25455	3.54	4.72	2.63856	5.00632	2.36	2.63856	4.72	3.54	3.91362	3.54	3.54	3.73149	4.86526	5.27712
4.25455	3.54	3.91362	4.41516	4.41516	4.25455	3.54	4.72	2.8904	4.72	2.63856	3.33754	4.86526	3.54	4.41516	3.91362	3.33754	3.54	2.8904	5.00632
4.86526	3.73149	3.73149	4.25455	3.54	1.18	3.73149	5.00632	2.8904	4.86526	3.33754	3.91362	4.86526	3.33754	3.73149	3.54	3.54	3.91362	2.63856	4.72
5.00632	3.54	3.54	2.8904	4.25455	1.66877	3.54	4.86526	2.8904	5.27712	7.91568	3.33754	5.1435	3.54	3.91362	4.25455	4.72	3.54	2.63856	4.72
4.25455	4.86526	2.8904	2.63856	4.25455	4.08764	3.91362	4.72	2.36	4.41516	2.36	3.33754	5.40744	3.33754	3.73149	3.54	3.54	3.73149	4.41516	4.86526
4.86526	4.86526	2.8904	2.63856	4.86526	4.08764	3.54	4.72	4.25455	4.86526	2.63856	3.33754	5.00632	3.33754	4.41516	4.25455	3.73149	2.8904	2.63856	5.1435
4.86526	5.00632	3.33754	4.86526	4.41516	3.54	3.54	4.72	4.41516	4.86526	2.63856	3.33754	5.00632	3.33754	4.86526	3.33754	3.73149	3.91362	2.63856	4.72
5.00632	6.35449	3.33754	4.41516	3.91362	3.91362	3.91362	4.72	4.08764	5.27712	2.36	2.63856	4.72	3.33754	4.86526	3.33754	4.08764	3.54	2.63856	5.00632
3.73149	6.88052	2.8904	4.41516	3.33754	3.73149	3.54	5.27712	2.63856	5.00632	2.8904	3.33754	4.72	3.54	4.86526	4.25455	4.25455	3.73149	2.63856	4.86526
5.1435	6.77858	3.54	4.86526	3.73149	3.54	3.54	5.27712	2.63856	5.40744	7.91568	3.91362	5.00632	3.33754	4.86526	3.54	4.25455	3.54	4.41516	5.00632
4.86526	8.5091	3.33754	2.8904	4.86526	3.54	3.33754	5.27712	3.33754	5.53469	2.8904	3.33754	4.72	3.33754	4.25455	4.25455	4.25455	3.33754	2.63856	5.1435
3.91362	8.9088	3.54	2.63856	3.54	3.54	3.54	5.27712	2.8904	4.72	2.8904	3.33754	4.72	3.54	4.41516	3.54	3.54	3.54	2.63856	5.1435
4.86526	8.98661	4.25455	2.8904	3.91362	4.41516	3.33754	5.7808	3.91362	4.86526	2.8904	3.54	4.72	3.33754	4.25455	3.73149	3.33754	3.73149	3.91362	4.72
4.86526	3.54	3.33754	2.63856	3.54	1.18	3.33754	5.40744	3.91362	5.27712	2.63856	3.33754	4.86526	3.33754	4.41516	4.72	4.41516	3.54	2.63856	4.72
4.25455	10.0819	3.33754	2.63856	3.33754	1.18	3.33754	5.27712	3.54	5.7808	2.63856	3.33754	5.00632	3.33754	4.25455	3.54	4.25455	3.73149	2.8904	4.86526
5.00632	9.51346	2.8904	2.63856	3.33754	3.73149	2.8904	5.27712	4.08764	4.86526	2.8904	3.54	5.00632	3.33754	4.25455	3.54	4.08764	3.54	3.73149	4.86526
3.33754	10.1507	2.8904	2.63856	3.54	3.73149	3.33754	5.40744	2.63856	5.00632	2.63856	3.33754	4.72	4.41516	3.91362	4.72	4.08764	3.91362	3.33754	5.00632
4.41516	10.8149	3.33754	4.86526	2.8904	4.41516	2.8904	5.1435	2.63856	4.86526	3.33754	2.63856	4.72	4.86526	4.41516	3.73149	3.54	3.54	3.33754	4.86526
4.08764	11.1321	2.8904	4.86526	4.86526	4.25455	3.33754	5.40744	2.63856	5.27712	6.98097	3.33754	5.00632	5.1435	4.25455	3.54	3.33754	3.73149	3.33754	4.72
3.54	11.1321	2.8904	4.41516	3.33754	4.25455	2.8904	5.1435	2.63856	5.53469	7.27401	3.54	4.72	4.25455	4.41516	3.73149	4.08764	3.54	2.63856	4.72
5.40744	11.1321	2.8904	4.41516	3.54	4.25455	10.0819	5.00632	3.73149	5.1435	7.64727	3.54	5.00632	4.25455	4.86526	3.54	4.08764	3.91362	3.91362	4.72
2.8904	11.4405	2.8904	4.41516	2.8904	4.25455	10.1507	4.86526	4.08764	5.00632	2.8904	3.33754	5.00632	4.25455	4.86526	3.54	3.33754	3.54	3.33754	4.86526
3.91362	3.54	2.8904	2.8904	3.54	3.91362	3.54	4.72	2.63856	5.00632	3.33754	3.33754	5.00632	4.25455	4.86526	4.41516	3.33754	3.73149	3.33754	5.00632
3.54	10.5542	2.63856	2.63856	3.33754	3.73149	4.08764	4.72	2.63856	5.00632	3.33754	2.63856	4.72	4.25455	4.86526	3.54	4.08764	3.73149	3.33754	4.86526
3.91362	10.5542	4.86526	2.63856	3.73149	3.73149	3.54	4.86526	3.33754	5.00632	3.33754	3.33754	5.00632	4.25455	4.25455	3.33754	4.08764	3.33754	4.25455	4.72
4.08764	11.3795	2.63856	2.63856	3.33754	3.54	2.63856	4.72	2.8904	4.86526	7.46298	3.54	4.72	3.33754	3.73149	3.54	3.33754	3.54	2.8904	4.72
3.54	11.6814	2.36	2.63856	4.72	3.54	3.33754	4.41516	3.73149	5.00632	1.66877	3.33754	4.86526	3.33754	3.91362	3.54	4.08764	3.73149	2.63856	4.72
3.33754	11.6814	2.63856	2.63856	3.33754	3.54	3.54	4.86526	4.08764	5.00632	2.63856	3.33754	5.00632	2.63856	4.41516	3.73149	4.08764	3.54	2.63856	4.72
4.86526	12.1488	2.63856	4.86526	3.54	3.73149	3.54	5.00632	2.63856	5.00632	3.33754	3.54	5.00632	2.63856	4.72	4.25455	3.54	3.54	2.63856	4.86526
3.33754	11.3795	3.33754	4.41516	3.54	4.25455	3.33754	5.00632	2.63856	5.00632	3.33754	2.8904	4.72	2.8904	4.25455	3.33754	4.08764	3.54	3.91362	5.27712
3.73149	11.6814	2.8904	4.41516	3.54	3.54	2.8904	5.00632	2.63856	5.27712	3.33754	2.63856	4.72	2.63856	4.41516	3.33754	4.08764	3.91362	2.8904	4.86526
3.33754	11.7409	3.54	4.41516	3.54	3.54	2.8904	4.86526	3.33754	5.40744	7.55569	3.33754	4.86526	2.63856	4.25455	3.54	3.54	3.54	2.63856	5.00632
3.33754	10.9429	3.33754	4.41516	3.33754	3.54	9.21609	4.72	2.8904	5.1435	2.36	2.8904	5.00632	2.8904	5.00632	3.33754	3.33754	3.73149	3.73149	4.86526
5.1435	11.1321	2.63856	5.00632	4.25455	3.73149	10.0126	4.72	4.25455	5.27712	2.04382	3.33754	5.00632	3.33754	4.41516	3.54	3.91362	3.54	3.33754	4.86526
3.33754	11.4405	2.63856	3.54	3.91362	4.25455	8.98661	4.72	3.73149	5.40744	2.36	3.33754	5.00632	3.33754	4.86526	3.33754	3.91362	3.33754	2.63856	4.72
3.54	11.6814	2.63856	3.33754	3.33754	4.25455	3.54	4.72	3.91362	5.27712	2.04382	2.63856	4.86526	4.72	4.41516	3.33754	3.54	3.54	3.54	4.72
5.00632	11.7409	4.41516	3.33754	3.54	4.25455	3.54	4.72	2.63856	5.53469	1.66877	2.63856	5.00632	4.86526	4.25455	3.33754	3.54	2.63856	3.33754	4.72
3.54	11.6814	3.73149	3.33754	3.33754	4.41516	2.63856	4.72	2.63856	5.27712	2.04382	3.33754	5.00632	5.27712	3.33754	3.33754	3.33754	3.33754	3.33754	4.72
3.33754	11.6217	4.25455	3.33754	3.54	4.41516	3.33754	4.72	2.63856	5.7808	2.8904	2.8904	5.00632	5.1435	3.33754	3.33754	3.33754	2.63856	2.63856	4.72
3.54	11.3795	4.08764	3.33754	3.33754	4.25455	3.33754	4.72	2.63856	5.9	7.08	2.63856	4.72	4.86526	3.33754	3.33754	3.33754	3.73149	2.63856	4.86526
3.54	11.1321	3.54	3.33754	3.33754	4.25455	3.33754	4.72	3.33754	5.00632	7.27401	3.33754	4.72	4.08764	4.25455	3.54	2.8904	2.63856	2.63856	4.86526
4.25455	10.9429	3.54	3.33754	3.73149	4.25455	3.54	4.25455	2.8904	5.00632	2.63856	3.54	4.86526	4.25455	3.73149	3.54	3.33754	3.54	3.54	4.86526
3.33754	10.6854	3.91362	3.33754	3.54	3.54	3.54	4.25455	2.63856	5.7808	2.63856	2.8904	5.00632	4.25455	4.72	3.54	3.33754	2.63856	2.8904	4.41516
5.27712	10.3545	3.33754	2.8904	4.41516	4.25455	3.73149	4.25455	2.8904	5.00632	2.36	2.8904	5.00632	2.63856	4.86526	3.73149	2.8904	3.54	2.8904	5.00632
3.33754	3.54	4.25455	2.8904	3.91362	3.73149	3.73149	4.25455	3.54	4.41516	3.33754	3.33754	4.72	2.63856	4.25455	3.91362	4.08764	2.63856	2.63856	4.86526
3.54	10.8791	3.73149	2.63856	3.73149	3.73149	3.54	4.41516	4.72	3.91362	6.88052	2.8904	4.72	2.63856	4.72	4.08764	3.54	3.54	2.63856	5.1435
5.00632	11.1321	3.54	2.63856	3.33754	4.25455	9.21609	4.72	4.72	4.41516	6.77858	2.63856	4.86526	2.63856	4.72	4.25455	3.54	3.33754	2.63856	4.86526
3.33754	10.8149	3.91362	4.86526	3.54	4.25455	9.51346	4.72	4.25455	4.86526	3.33754	3.33754	5.00632	2.63856	4.86526	5.00632	2.8904	3.33754	3.91362	4.41516
3.91362	10.8791	3.73149	4.41516	4.72	4.25455	3.54	4.72	2.63856	4.25455	6.67509	3.33754	4.72	2.63856	4.86526	4.41516	2.8904	2.36	3.33754	4.86526
5.1435	10.6854	3.33754	4.41516	3.91362	4.25455	3.91362	4.41516	2.63856	4.86526	7.46298	2.8904	4.72	5.00632	5.00632	4.41516	2.63856	3.73149	3.33754	4.41516
3.33754	3.54	3.91362	4.72	3.33754	4.25455	3.54	4.25455	3.33754	4.25455	2.8904	3.33754	4.86526	5.00632	4.86526	4.86526	3.33754	2.36	2.63856	4.41516
3.54	10.8791	3.33754	4.72	3.54	4.72	3.33754	4.25455	3.33754	4.41516	6.98097	3.33754	5.00632	5.53469	4.25455	5.27712	2.8904	3.54	2.63856	4.41516
3.33754	11.1321	4.25455	4.25455	3.33754	4.41516	2.8904	4.25455	3.33754	5.00632	3.33754	2.63856	4.86526	5.1435	3.54	4.41516	2.8904	2.63856	4.25455	4.86526
5.00632	10.8149	3.91362	4.41516	3.33754	4.25455	2.8904	4.25455	3.33754	4.86526	3.33754	2.8904	4.25455	4.86526	3.54	4.25455	3.33754	3.54	3.33754	4.86526
2.8904	10.8149	3.33754	5.1435	3.91362	4.25455	3.33754	4.25455	3.54	4.25455	6.77858	3.54	4.72	3.33754	4.86526	4.25455	2.8904	2.36	2.8904	4.86526
3.33754	10.5542	4.25455	3.54	3.73149	4.25455	2.8904	3.73149	3.33754	4.41516	6.77858	3.33754	4.86526	3.33754	4.86526	4.08764	2.8904	3.73149	2.63856	4.41516
3.54	3.33754	3.54	4.41516	3.54	4.25455	3.33754	3.91362	3.54	4.41516	3.33754	2.63856	4.86526	4.08764	4.41516	3.33754	3.33754	2.63856	3.91362	4.25455
5.00632	10.62	4.25455	4.41516	3.91362	4.25455	3.33754	4.25455	3.73149	4.41516	6.67509	3.33754	4.41516	4.25455	4.41516	3.33754	3.33754	3.54	3.33754	4.25455
3.54	10.1507	3.91362	4.41516	3.91362	3.73149	3.33754	4.25455	3.91362	4.41516	3.33754	3.54	4.25455	4.25455	5.00632	3.33754	4.08764	2.36	3.33754	4.41516
3.54	10.2191	3.54	5.00632	3.73149	3.73149	3.33754	4.25455	4.86526	4.25455	6.35449	1.66877	4.86526	2.63856	5.00632	3.33754	3.54	3.54	3.33754	4.86526
4.08764	9.51346	4.25455	4.86526	3.54	3.54	3.33754	4.25455	4.25455	4.86526	6.35449	1.18	5.00632	2.63856	4.86526	3.33754	4.08764	2.36	3.33754	4.41516
3.54	9.87259	3.73149	4.41516	3.33754	4.08764	9.06375	3.54	4.08764	5.00632	3.33754	2.63856	4.86526	2.63856	5.00632	3.33754	3.33754	3.54	2.8904	4.86526
5.00632	3.33754	3.33754	4.41516	3.73149	4.25455	4.08764	3.54	4.41516	5.1435	6.67509	3.33754	4.72	2.63856	2.63856	2.8904	2.63856	2.63856	2.63856	4.86526
3.54	10.3545	4.25455	4.41516	3.33754	4.25455	3.33754	3.54	3.91362	4.72	6.01684	3.33754	4.86526	2.04382	2.63856	3.33754	2.63856	3.54	2.63856	4.86526
4.08764	3.33754	3.33754	4.25455	2.8904	4.25455	3.33754	3.73149	3.73149	4.25455	2.8904	1.18	4.41516	1.66877	2.8904	2.8904	2.8904	2.36	3.73149	4.86526
4.08764	9.80182	4.41516	4.25455	4.08764	4.25455	3.33754	4.25455	4.41516	4.41516	6.67509	2.63856	4.25455	1.66877	4.86526	2.63856	3.33754	3.54	3.33754	4.25455
3.54	10.0126	3.91362	4.72	3.91362	4.25455	8.26	3.54	4.08764	4.25455	6.35449	3.33754	4.25455	2.04382	4.41516	2.63856	2.8904	2.63856	2.8904	4.41516
4.25455	10.3545	3.33754	4.86526	3.54	4.25455	8.9088	3.54	4.41516	5.00632	3.33754	3.91362	4.86526	2.63856	5.00632	2.63856	3.33754	3.33754	3.33754	4.25455
4.86526	10.3545	4.25455	4.86526	3.91362	4.25455	8.98661	3.73149	3.54	4.86526	6.35449	3.54	5.00632	2.63856	4.86526	2.63856	3.91362	2.63856	3.33754	4.86526
3.91362	9.29133	3.73149	4.86526	4.25455	4.25455	4.08764	4.25455	4.41516	3.91362	3.33754	2.63856	5.00632	2.63856	2.63856	2.8904	3.73149	3.54	3.33754	4.41516
3.91362	3.33754	3.54	4.41516	3.91362	4.25455	3.91362	4.25455	4.72	5.53469	6.35449	1.18	4.86526	2.8904	2.63856	2.63856	3.33754	2.63856	3.33754	4.25455
2.8904	9.58637	4.41516	4.41516	2.63856	4.25455	8.34386	3.54	3.33754	4.41516	6.01684	1.18	5.27712	3.33754	2.63856	2.63856	3.33754	3.54	3.33754	4.25455
4.25455	9.80182	3.73149	4.41516	3.33754	3.73149	8.59053	3.73149	4.72	3.91362	3.33754	2.8904	5.40744	3.33754	2.63856	2.63856	3.54	3.33754	3.54	4.25455
3.54	10.0126	3.33754	5.1435	2.63856	3.73149	8.9088	4.25455	3.33754	4.25455	6.01684	3.54	5.27712	2.63856	5.00632	2.63856	2.8904	3.54	3.33754	4.41516
3.33754	10.0819	4.25455	5.1435	2.63856	3.91362	3.91362	4.25455	4.41516	4.41516	2.8904	3.73149	5.27712	2.63856	5.53469	2.63856	4.08764	3.33754	3.33754	4.25455
4.41516	9.80182	3.33754	4.41516	4.41516	4.25455	8.26	2.63856	3.33754	4.25455	5.9	3.33754	5.00632	2.63856	5.00632	2.36	3.33754	3.33754	3.33754	4.25455
3.91362	9.73053	4.25455	5.00632	3.91362	4.25455	8.59053	2.63856	2.8904	3.73149	5.9	3.33754	4.86526	2.63856	4.86526	3.33754	3.33754	3.33754	2.8904	4.25455
3.33754	3.33754	4.41516	4.86526	3.54	4.25455	3.91362	2.63856	3.91362	5.1435	3.33754	3.73149	4.72	2.63856	4.72	2.8904	3.33754	3.73149	2.63856	4.41516
3.54	9.73053	3.54	4.25455	3.54	4.25455	7.91568	2.63856	2.8904	3.91362	6.35449	2.63856	5.1435	2.63856	4.86526	2.63856	4.41516	3.33754	2.63856	4.25455
4.41516	9.80182	4.86526	4.86526	3.91362	4.25455	8.34386	2.8904	4.25455	3.73149	5.7808	3.33754	4.72	2.04382	4.25455	3.33754	3.33754	3.54	2.63856	4.25455
3.54	10.0819	3.91362	4.41516	4.25455	4.25455	8.42689	2.63856	4.08764	4.41516	3.33754	3.73149	3.73149	2.04382	4.41516	2.8904	2.8904	3.33754	2.63856	4.41516
3.33754	3.54	3.33754	4.86526	4.72	4.25455	4.08764	2.63856	2.8904	3.73149	6.01684	3.33754	3.73149	1.66877	4.41516	2.63856	3.33754	3.73149	2.63856	4.08764
3.33754	9.44	4.25455	4.25455	4.72	4.25455	7.82723	2.8904	3.54	4.86526	3.33754	3.33754	4.72	1.66877	2.63856	2.63856	2.8904	3.54	2.8904	4.25455
4.86526	9.44	3.33754	3.73149	4.25455	4.41516	8.26	3.33754	2.8904	3.54	6.01684	3.54	4.72	2.04382	2.63856	2.63856	2.8904	3.73149	3.91362	4.25455
3.91362	9.44	4.25455	4.86526	3.33754	4.25455	4.08764	3.33754	3.91362	4.08764	5.7808	3.54	4.86526	2.63856	2.63856	2.63856	3.54	3.54	3.33754	4.25455
3.33754	9.44	3.73149	4.41516	2.8904	4.25455	7.27401	4.25455	2.8904	4.41516	3.33754	3.33754	3.73149	2.63856	4.86526	2.63856	3.91362	3.54	3.33754	3.73149
4.86526	3.54	3.54	4.86526	4.25455	4.41516	7.55569	4.25455	4.41516	4.41516	5.40744	4.08764	3.33754	2.63856	5.40744	2.63856	3.33754	3.33754	3.54	4.25455
3.54	8.34386	4.25455	4.08764	3.73149	4.41516	4.08764	4.25455	2.8904	4.72	5.9	3.33754	3.33754	2.63856	5.1435	2.63856	2.8904	3.54	3.33754	4.25455
3.33754	8.34386	3.33754	4.86526	3.33754	4.72	3.33754	4.86526	2.63856	4.86526	5.9	2.8904	4.72	2.63856	5.40744	2.63856	3.33754	3.54	3.33754	4.41516
3.33754	8.59053	4.41516	4.41516	4.86526	4.86526	7.08	4.25455	3.73149	3.54	2.8904	3.91362	4.25455	2.63856	5.1435	2.63856	3.33754	3.91362	4.25455	3.73149
4.25455	8.98661	4.25455	4.86526	3.33754	4.86526	7.17766	3.54	2.8904	3.73149	5.1435	3.91362	4.25455	2.8904	5.00632	2.63856	3.54	3.54	3.33754	4.08764
4.41516	3.54	3.33754	3.73149	3.33754	4.86526	7.46298	2.63856	2.63856	4.41516	5.9	2.63856	4.41516	3.33754	5.00632	2.63856	3.54	3.73149	3.33754	4.25455
3.91362	8.26	4.25455	4.86526	3.33754	4.25455	4.08764	2.8904	2.63856	5.00632	3.33754	3.54	4.08764	2.63856	2.63856	2.63856	3.54	3.33754	3.33754	3.73149
2.8904	8.26	3.54	4.86526	2.8904	4.41516	6.98097	3.33754	2.04382	4.86526	5.00632	3.54	3.54	2.8904	2.63856	2.63856	3.91362	3.54	4.25455	4.08764
2.8904	8.26	4.25455	4.41516	4.41516	4.41516	7.17766	3.33754	4.25455	5.00632	5.7808	3.54	3.73149	2.63856	2.63856	3.33754	4.86526	3.33754	3.33754	4.86526
4.25455	8.26	4.25455	4.86526	3.91362	4.25455	7.46298	2.8904	4.41516	4.08764	2.8904	2.63856	3.91362	2.8904	4.72	3.54	5.1435	3.73149	3.33754	4.25455
3.54	8.26	3.33754	4.41516	3.54	4.25455	3.91362	2.63856	3.33754	5.1435	5.1435	4.08764	4.25455	3.33754	4.72	3.91362	3.33754	3.54	3.33754	4.25455
2.8904	8.26	4.41516	4.41516	4.86526	4.25455	4.08764	2.63856	2.63856	5.00632	2.63856	3.33754	4.25455	2.8904	5.1435	3.54	4.25455	3.91362	3.54	3.54
2.63856	8.26	3.91362	4.08764	3.33754	4.41516	6.88052	2.63856	2.63856	5.00632	5.1435	3.33754	4.25455	3.54	5.00632	4.08764	4.25455	3.54	4.86526	4.25455
4.25455	8.34386	3.33754	4.86526	2.8904	4.72	7.17766	2.63856	4.41516	3.54	5.7808	3.73149	4.25455	3.33754	5.53469	2.63856	5.1435	3.73149	4.25455	4.86526
3.33754	8.59053	4.25455	4.86526	2.63856	4.72	7.27401	2.63856	3.33754	4.08764	2.63856	3.73149	4.25455	3.33754	5.1435	2.04382	5.27712	3.54	4.86526	5.9
2.8904	8.98661	3.33754	4.86526	4.41516	4.41516	6.98097	2.63856	2.8904	5.1435	5.53469	3.54	4.86526	3.33754	5.00632	1.66877	3.33754	3.54	4.25455	5.00632
2.36	8.67119	4.41516	3.91362	4.08764	4.72	3.91362	2.63856	2.63856	4.86526	3.33754	3.33754	5.00632	3.33754	5.1435	2.04382	3.33754	3.54	4.25455	6.35449
4.41516	3.54	3.91362	5.00632	4.08764	4.86526	7.08	2.63856	2.63856	4.41516	5.1435	3.54	5.00632	2.63856	5.00632	2.04382	5.00632	3.54	3.33754	5.7808
2.8904	8.34386	2.8904	4.86526	3.73149	4.86526	6.98097	2.63856	3.73149	5.00632	5.1435	3.73149	5.00632	2.8904	2.63856	2.63856	3.33754	3.54	3.33754	4.86526
4.41516	8.34386	4.41516	4.86526	4.41516	5.00632	3.91362	2.63856	3.33754	4.08764	2.63856	3.33754	4.72	3.33754	2.63856	2.63856	4.86526	3.73149	3.33754	3.33754
2.8904	8.34386	3.73149	3.54	3.33754	5.1435	6.35449	2.63856	2.63856	4.86526	5.1435	3.73149	4.72	2.63856	2.63856	2.63856	3.33754	3.54	3.33754	3.33754
4.41516	8.42689	3.33754	4.86526	3.33754	5.1435	6.88052	2.63856	2.8904	4.86526	3.33754	3.33754	4.72	2.8904	4.72	2.63856	4.25455	3.91362	3.91362	3.33754
3.33754	8.26	4.25455	5.00632	2.8904	5.00632	6.77858	2.63856	4.25455	4.08764	5.00632	3.33754	4.25455	3.33754	4.86526	3.33754	3.33754	3.73149	4.25455	3.33754
4.41516	8.00315	3.33754	4.86526	2.63856	5.00632	4.08764	2.63856	3.33754	4.41516	3.33754	3.33754	3.73149	3.33754	5.00632	3.73149	4.08764	3.73149	4.41516	3.73149
2.8904	3.54	4.41516	5.00632	3.33754	5.53469	6.35449	4.25455	2.8904	4.41516	5.1435	3.54	3.54	2.8904	5.53469	3.73149	3.33754	3.54	4.41516	5.9
4.41516	8.26	4.25455	4.86526	2.8904	5.40744	6.77858	3.54	2.63856	4.41516	5.00632	3.73149	3.33754	3.33754	5.53469	2.8904	4.08764	3.54	4.25455	4.86526
3.33754	8.26	3.33754	3.54	2.63856	5.1435	6.46313	4.08764	2.63856	5.27712	5.00632	3.33754	3.33754	3.33754	5.1435	3.54	3.33754	3.54	3.33754	4.41516
4.86526	3.73149	4.25455	5.40744	4.25455	4.41516	3.91362	4.08764	2.63856	4.08764	2.8904	3.73149	3.33754	3.33754	5.53469	4.08764	3.54	3.73149	3.33754	4.41516
3.33754	7.08	3.91362	5.40744	3.54	4.86526	5.9	4.41516	4.72	4.86526	4.86526	3.73149	3.33754	3.33754	5.00632	4.08764	3.33754	3.33754	2.8904	4.25455
4.25455	7.08	3.33754	5.1435	3.91362	4.72	6.46313	4.08764	2.8904	3.91362	5.40744	3.54	3.33754	3.33754	5.1435	3.73149	3.33754	3.54	2.63856	3.91362
3.33754	7.17766	4.41516	3.91362	3.33754	4.72	6.35449	4.41516	2.8904	5.00632	3.33754	3.33754	2.63856	3.33754	5.00632	3.73149	3.91362	3.91362	4.41516	3.54
4.41516	3.91362	3.73149	5.40744	4.41516	4.72	4.08764	4.25455	2.63856	4.08764	5.1435	3.54	2.8904	2.63856	3.33754	3.33754	3.33754	3.73149	4.25455	3.73149
3.33754	6.13146	3.33754	5.40744	4.25455	4.72	5.9	4.86526	2.63856	4.25455	3.33754	3.33754	3.33754	2.8904	3.33754	3.33754	3.54	3.54	4.72	3.33754
4.41516	6.46313	4.25455	4.86526	2.8904	4.72	6.46313	4.41516	2.63856	4.72	4.86526	3.33754	3.33754	5.00632	2.8904	3.33754	3.54	3.54	4.72	3.54
3.33754	6.77858	2.8904	3.54	2.63856	4.72	6.35449	4.25455	4.41516	4.08764	5.00632	3.73149	3.33754	5.1435	2.63856	4.08764	3.33754	3.73149	4.86526	3.54
4.86526	7.08	4.25455	4.86526	2.63856	4.72	3.91362	4.25455	3.54	4.41516	4.25455	3.54	3.33754	5.53469	4.72	3.73149	3.54	3.33754	3.54	3.33754
3.33754	7.08	4.25455	4.86526	3.33754	4.41516	3.54	5.00632	2.8904	3.73149	3.33754	3.54	3.33754	5.00632	5.1435	3.33754	3.33754	3.54	3.33754	3.33754
4.25455	7.08	2.04382	3.91362	2.8904	4.72	6.01684	4.86526	3.91362	5.00632	4.86526	3.54	3.33754	3.54	5.00632	2.63856	3.54	3.54	2.8904	3.33754
3.33754	7.08	4.41516	4.86526	3.73149	4.41516	6.67509	4.86526	3.33754	3.73149	2.8904	4.08764	3.33754	4.08764	5.53469	3.54	3.33754	3.54	2.63856	3.91362
4.41516	6.98097	3.73149	4.86526	3.33754	4.72	6.35449	5.1435	2.8904	4.25455	4.41516	3.54	3.33754	2.8904	5.00632	3.54	3.54	3.91362	3.54	3.73149
3.33754	7.08	2.36	4.86526	3.73149	4.86526	3.54	5.1435	2.63856	5.1435	4.41516	4.08764	3.33754	2.8904	5.1435	3.33754	3.54	3.54	5.00632	3.91362
4.41516	7.17766	4.41516	3.54	3.33754	5.00632	6.35449	4.86526	2.63856	3.91362	2.63856	3.73149	3.33754	2.63856	5.00632	3.33754	3.54	3.91362	5.00632	4.25455
3.33754	7.27401	3.73149	4.86526	4.25455	5.27712	5.9	5.1435	2.63856	4.25455	4.41516	3.54	3.33754	2.8904	3.33754	3.91362	3.54	3.33754	5.53469	3.73149
4.41516	7.46298	2.04382	4.86526	3.33754	5.40744	3.54	4.86526	4.41516	3.73149	4.25455	3.54	3.54	3.33754	3.33754	3.54	3.33754	3.54	3.54	4.25455
3.33754	7.46298	4.41516	3.33754	3.33754	5.1435	5.9	4.86526	3.54	4.72	2.8904	4.25455	3.54	2.63856	3.33754	3.33754	3.33754	3.54	3.33754	3.33754
4.86526	7.17766	2.36	4.86526	2.8904	5.00632	6.46313	4.25455	2.8904	3.91362	4.86526	3.73149	3.54	5.1435	4.72	2.8904	3.54	3.54	3.33754	3.33754
3.33754	7.08	4.41516	4.86526	2.8904	5.7808	3.54	4.25455	2.63856	4.25455	4.25455	3.54	3.33754	5.00632	4.72	3.54	3.33754	3.54	3.73149	3.33754
4.41516	6.88052	4.25455	4.86526	4.41516	5.40744	5.9	3.91362	2.63856	4.25455	3.33754	3.73149	3.33754	5.53469	5.1435	3.54	3.54	3.54	5.00632	2.8904
3.33754	6.35449	2.04382	4.41516	3.54	5.7808	5.9	4.25455	2.63856	5.00632	4.41516	3.91362	3.91362	5.1435	5.00632	3.33754	3.54	3.91362	5.1435	2.63856
4.41516	6.13146	4.25455	3.33754	3.33754	4.86526	3.54	3.33754	3.73149	3.91362	4.86526	4.08764	4.72	5.53469	5.53469	2.63856	3.33754	3.33754	5.40744	4.08764
3.33754	5.9	4.41516	4.86526	4.25455	5.7808	5.9	3.54	3.33754	4.25455	4.25455	3.54	4.25455	5.1435	5.1435	3.54	3.33754	3.54	3.33754	3.73149
4.41516	5.9	2.36	5.1435	3.33754	5.9	5.9	3.54	2.8904	5.40744	3.33754	3.73149	4.25455	2.8904	5.00632	3.73149	3.54	3.91362	3.33754	3.91362
3.33754	4.25455	4.86526	4.86526	2.8904	5.9	3.54	3.33754	4.25455	3.73149	4.86526	4.25455	3.33754	3.54	5.1435	3.33754	3.33754	3.73149	3.54	4.25455
4.25455	6.98097	3.91362	4.86526	3.33754	5.9	5.9	3.33754	3.33754	4.41516	4.86526	4.08764	3.33754	4.08764	5.00632	3.33754	3.54	3.33754	3.54	3.73149
3.33754	7.08	2.04382	3.54	4.41516	6.01684	5.9	3.33754	2.63856	5.7808	4.86526	3.54	4.41516	3.33754	3.33754	2.8904	3.33754	3.54	3.33754	3.73149
4.25455	6.98097	4.25455	5.00632	3.33754	6.01684	4.08764	3.33754	2.63856	3.54	3.54	3.54	4.25455	3.33754	3.33754	2.63856	3.33754	3.33754	3.33754	3.33754
4.25455	6.88052	2.63856	5.00632	3.54	6.35449	5.7808	3.33754	2.8904	5.40744	4.86526	4.08764	4.72	3.33754	3.33754	3.91362	3.54	3.54	3.33754	3.33754
3.73149	6.13146	4.41516	4.86526	3.54	6.35449	5.40744	2.8904	2.63856	4.86526	3.33754	4.08764	3.54	3.33754	2.8904	3.54	3.54	3.54	3.91362	3.91362
4.25455	6.01684	3.91362	5.00632	3.54	6.35449	5.1435	2.63856	3.54	5.27712	4.41516	3.54	3.54	3.33754	4.72	3.54	3.54	3.91362	5.27712	3.33754
3.54	5.9	3.33754	4.86526	3.91362	6.46313	3.73149	2.63856	3.54	3.54	4.41516	3.73149	3.73149	3.33754	4.72	3.33754	3.54	3.54	5.7808	3.73149
4.41516	3.91362	4.25455	3.33754	3.33754	6.67509	5.9	2.63856	2.8904	5.7808	2.63856	3.33754	4.25455	3.33754	4.72	3.54	3.54	3.73149	5.9	3.54
3.91362	6.67509	2.8904	5.1435	3.33754	6.35449	5.9	2.63856	2.63856	5.00632	4.86526	4.08764	4.86526	3.33754	5.00632	3.54	3.54	3.54	5.40744	3.73149
4.41516	6.77858	4.41516	4.86526	3.33754	6.35449	5.7808	2.63856	2.63856	5.9	4.25455	3.54	4.86526	3.33754	5.40744	3.54	3.33754	3.73149	3.33754	3.73149
3.73149	6.46313	3.33754	4.08764	2.8904	6.46313	3.33754	2.63856	2.63856	5.53469	3.33754	3.54	3.91362	3.33754	5.7808	4.08764	3.33754	3.54	3.33754	3.33754
4.25455	3.54	4.86526	5.40744	3.91362	5.7808	5.9	2.63856	3.73149	5.53469	4.86526	3.73149	4.72	2.8904	5.1435	3.33754	3.33754	3.33754	3.33754	3.54
3.91362	6.67509	4.25455	4.86526	3.54	6.35449	5.7808	2.63856	3.54	4.72	4.25455	4.08764	5.27712	3.33754	5.53469	3.33754	3.33754	3.33754	4.41516	3.33754
4.25455	6.67509	3.33754	5.1435	3.54	6.35449	5.40744	2.63856	2.8904	4.41516	3.33754	3.73149	4.25455	3.33754	5.1435	3.33754	3.54	3.54	5.00632	3.54
4.25455	6.88052	4.86526	5.40744	3.91362	6.46313	4.86526	2.63856	2.8904	4.25455	4.41516	3.54	4.86526	3.33754	5.00632	3.33754	3.33754	3.33754	5.1435	3.33754
4.25455	6.77858	3.91362	4.86526	3.54	6.67509	3.33754	4.25455	4.41516	4.25455	4.41516	4.25455	4.86526	3.33754	4.86526	3.54	3.33754	4.25455	5.27712	3.33754
4.25455	5.9	2.63856	4.86526	3.54	6.35449	5.40744	3.54	3.33754	3.73149	2.63856	4.08764	4.86526	5.00632	3.33754	3.54	3.33754	2.8904	3.54	3.33754
4.25455	3.33754	4.25455	3.54	3.54	5.1435	4.86526	3.54	2.8904	3.33754	4.25455	3.54	4.72	5.7808	3.33754	3.54	3.54	3.73149	4.08764	3.54
3.91362	5.9	2.63856	5.40744	3.54	6.67509	3.33754	4.08764	2.63856	3.54	2.63856	3.54	5.40744	5.9	3.33754	3.54	3.33754	3.33754	4.25455	3.33754
4.41516	5.9	4.41516	5.40744	3.54	6.67509	5.27712	3.54	2.63856	5.1435	4.25455	4.25455	5.1435	5.53469	3.33754	3.54	3.33754	3.33754	4.25455	3.33754
4.08764	6.13146	4.25455	4.86526	3.33754	6.46313	5.27712	4.08764	2.63856	6.13146	2.63856	4.08764	5.00632	5.53469	4.72	3.33754	3.33754	3.54	4.25455	2.8904
4.86526	6.35449	3.33754	3.33754	3.91362	6.35449	3.54	3.91362	3.54	4.41516	4.41516	3.73149	4.72	3.54	4.72	3.54	3.54	3.54	3.33754	3.33754
4.25455	6.46313	4.86526	5.40744	3.91362	6.46313	5.7808	4.08764	3.33754	4.41516	4.86526	4.08764	4.86526	3.54	4.72	3.54	3.33754	3.33754	3.33754	3.33754
5.40744	6.35449	3.33754	5.40744	3.91362	6.77858	5.1435	4.08764	3.33754	4.41516	4.25455	3.91362	4.41516	3.33754	5.00632	3.54	3.33754	4.25455	3.33754	3.33754
4.41516	6.01684	4.86526	5.1435	4.08764	6.46313	3.33754	4.25455	2.8904	4.25455	4.25455	4.08764	4.08764	3.54	5.53469	3.54	3.33754	3.33754	3.54	3.33754
5.9	5.9	4.86526	5.00632	3.54	7.17766	5.7808	4.86526	3.91362	4.72	2.63856	3.54	4.25455	3.54	5.9	3.91362	3.54	4.41516	4.08764	3.54
3.33754	3.91362	3.33754	4.86526	4.41516	4.25455	3.54	5.1435	3.54	4.41516	4.41516	3.33754	4.72	3.54	5.53469	3.33754	3.54	3.33754	3.33754	3.73149
4.08764	6.01684	4.86526	3.33754	3.54	4.25455	5.27712	5.00632	3.33754	4.25455	4.86526	3.54	4.25455	3.33754	5.53469	3.33754	3.33754	3.33754	3.33754	3.91362
4.25455	6.13146	4.41516	5.40744	3.91362	4.25455	5.40744	4.86526	2.8904	5.00632	4.25455	3.73149	4.41516	5.7808	5.1435	3.54	3.54	3.91362	3.33754	4.25455
5.27712	6.35449	3.33754	5.40744	3.91362	5.7808	3.54	4.41516	2.63856	4.86526	3.33754	3.91362	4.08764	6.01684	5.40744	3.54	3.54	3.33754	3.73149	4.25455
4.86526	6.35449	4.86526	4.86526	4.72	6.67509	5.00632	4.25455	2.8904	3.54	4.41516	4.25455	4.25455	6.13146	3.33754	3.33754	3.33754	3.54	4.08764	3.33754
4.86526	5.9	4.41516	3.33754	3.33754	6.67509	5.40744	4.25455	2.63856	3.54	4.41516	3.73149	4.41516	5.7808	3.33754	3.33754	3.33754	3.54	3.54	3.73149
5.40744	3.73149	3.33754	5.40744	4.25455	7.08	5.1435	2.63856	2.36	5.9	3.54	4.25455	3.91362	6.01684	3.33754	3.54	3.33754	3.33754	3.33754	3.91362
3.54	5.9	4.86526	5.1435	3.91362	7.17766	3.54	2.63856	4.41516	5.7808	4.86526	3.91362	4.25455	3.33754	4.41516	3.33754	3.33754	3.54	3.54	3.33754
3.33754	6.01684	3.33754	5.00632	3.54	6.46313	5.00632	2.8904	3.33754	5.40744	4.25455	4.41516	3.54	3.33754	5.9	3.54	3.33754	3.33754	3.54	3.73149
4.41516	6.13146	5.00632	4.86526	3.91362	6.98097	5.00632	2.8904	2.8904	4.86526	3.33754	3.54	4.72	3.54	5.7808	3.91362	3.54	3.33754	3.33754	3.73149
4.25455	6.35449	2.63856	3.33754	3.73149	7.17766	5.00632	4.25455	2.63856	6.01684	4.86526	4.86526	4.41516	3.33754	5.9	3.91362	3.33754	4.41516	4.08764	3.54
3.91362	6.35449	4.86526	5.1435	3.33754	7.08	3.33754	4.08764	2.8904	4.86526	4.25455	3.91362	4.25455	3.33754	5.9	3.54	3.73149	3.33754	3.54	3.33754
4.08764	3.54	4.86526	5.40744	4.41516	7.08	5.00632	3.54	2.63856	5.9	3.54	4.41516	4.41516	3.54	5.40744	3.54	3.33754	4.72	3.54	3.33754
3.54	5.40744	4.25455	5.27712	3.91362	7.08	5.00632	4.08764	3.54	4.25455	4.08764	4.08764	4.08764	3.33754	5.7808	3.33754	3.54	3.33754	3.54	3.73149
4.25455	5.7808	1.66877	4.86526	3.73149	7.08	4.86526	3.54	2.63856	3.91362	3.33754	3.33754	4.41516	3.33754	5.53469	3.33754	3.33754	4.72	3.33754	3.54
3.54	5.9	1.66877	3.33754	3.54	7.08	3.54	3.54	2.63856	3.33754	4.41516	3.54	4.86526	5.7808	5.53469	3.54	3.54	3.33754	3.33754	3.73149
3.54	5.9	1.66877	5.40744	4.25455	7.08	5.00632	3.54	2.63856	3.33754	4.41516	5.00632	4.25455	6.01684	5.00632	3.54	3.33754	3.54	4.25455	4.25455
4.41516	6.01684	1.66877	5.40744	4.25455	7.08	5.00632	3.91362	2.8904	3.33754	3.91362	4.25455	3.91362	5.7808	5.00632	3.33754	3.54	4.72	4.08764	3.33754
3.33754	6.01684	2.04382	5.27712	3.91362	7.08	3.54	3.73149	3.91362	2.8904	3.54	4.08764	4.41516	5.40744	3.54	3.54	3.33754	3.33754	3.73149	3.91362
3.33754	3.54	2.63856	3.33754	4.41516	4.25455	5.1435	4.08764	2.8904	3.33754	4.41516	4.25455	3.91362	5.27712	3.33754	3.54	3.54	3.54	4.25455	3.54
3.54	5.00632	2.04382	5.40744	4.25455	4.72	5.40744	3.91362	3.33754	2.63856	3.33754	4.08764	4.41516	4.86526	4.25455	3.54	3.33754	4.41516	3.73149	4.25455
3.54	5.27712	2.63856	5.40744	3.73149	4.25455	3.54	4.41516	3.33754	3.54	4.08764	4.25455	3.91362	4.41516	5.00632	3.33754	3.54	3.33754	4.41516	3.33754
3.33754	5.27712	2.8904	5.27712	4.25455	4.25455	5.27712	3.91362	2.8904	5.9	4.25455	4.86526	4.08764	3.54	5.1435	3.54	3.33754	3.73149	4.25455	3.91362
3.33754	5.9	4.25455	3.73149	4.08764	4.41516	5.40744	4.25455	2.63856	5.40744	4.25455	3.33754	4.08764	4.08764	5.27712	3.54	3.73149	3.91362	3.73149	3.54
3.33754	5.9	2.63856	5.40744	3.73149	4.41516	3.54	4.41516	2.8904	6.35449	4.41516	4.25455	4.08764	2.8904	5.40744	4.08764	2.8904	3.33754	4.41516	3.73149
3.54	5.9	2.63856	5.40744	4.72	4.25455	5.00632	3.54	2.63856	2.8904	3.54	4.25455	4.86526	3.33754	5.9	3.54	3.91362	3.33754	4.41516	3.91362
3.73149	5.9	2.63856	4.86526	3.91362	4.25455	5.00632	3.54	4.72	2.8904	4.25455	4.86526	4.08764	3.54	5.1435	3.54	3.33754	3.73149	3.91362	3.73149
4.25455	5.9	3.33754	3.91362	4.41516	4.41516	5.00632	3.33754	2.8904	3.33754	4.41516	4.72	4.08764	3.33754	5.53469	3.54	4.25455	3.33754	4.25455	4.08764
3.91362	3.54	2.8904	4.41516	3.91362	4.72	3.54	3.54	2.8904	3.54	3.54	4.25455	4.72	3.33754	5.9	3.33754	3.33754	3.73149	3.73149	4.25455
4.08764	5.27712	4.86526	5.1435	3.73149	4.72	5.00632	3.54	2.63856	5.7808	4.25455	4.41516	4.25455	3.33754	5.9	3.54	4.72	3.33754	4.25455	4.25455
4.25455	5.27712	2.36	5.27712	3.91362	4.25455	5.00632	3.33754	2.63856	2.8904	3.54	4.25455	4.25455	2.8904	3.33754	3.91362	3.33754	3.33754	4.41516	4.25455
4.25455	5.9	2.63856	4.86526	3.73149	4.25455	4.86526	3.54	2.63856	3.33754	4.25455	4.08764	4.86526	4.86526	3.33754	3.33754	4.86526	3.54	4.25455	4.25455
4.25455	5.9	2.36	4.25455	4.86526	4.25455	3.54	3.33754	2.8904	3.33754	4.41516	3.33754	4.25455	4.86526	3.54	3.54	3.33754	2.8904	4.25455	3.91362
4.25455	5.9	2.63856	3.73149	4.41516	4.41516	5.00632	3.33754	2.63856	3.54	4.25455	3.91362	4.25455	5.27712	3.54	4.08764	4.86526	4.08764	3.91362	3.73149
4.25455	5.9	2.63856	3.73149	3.91362	4.72	3.54	3.33754	4.41516	5.7808	3.33754	3.91362	4.86526	5.40744	3.33754	4.08764	3.33754	2.8904	4.25455	3.73149
4.41516	5.9	2.63856	3.73149	4.25455	4.41516	4.72	3.54	2.8904	2.8904	4.25455	4.41516	4.08764	5.00632	4.86526	3.91362	4.72	4.08764	3.91362	3.73149
4.25455	3.73149	2.8904	4.25455	3.91362	4.72	4.86526	3.33754	2.8904	2.8904	3.54	4.08764	4.25455	5.1435	5.9	4.25455	3.33754	3.33754	4.41516	4.25455
4.25455	5.7808	4.86526	4.86526	4.86526	4.86526	5.00632	3.33754	4.25455	3.54	4.86526	4.08764	4.08764	3.91362	5.9	4.08764	4.72	3.33754	3.91362	3.91362
3.91362	5.9	4.25455	3.91362	4.25455	4.25455	3.54	3.33754	2.63856	5.7808	4.25455	4.08764	4.72	4.25455	5.9	3.91362	2.8904	4.08764	4.41516	4.08764
3.73149	5.9	2.63856	5.40744	4.72	3.91362	2.63856	2.63856	2.8904	2.63856	3.54	3.33754	4.41516	2.36	5.9	4.25455	4.86526	3.54	4.72	3.73149
3.73149	5.9	2.63856	5.7808	3.91362	3.73149	3.33754	2.63856	2.63856	3.33754	4.41516	3.54	4.25455	2.63856	5.9	3.91362	3.33754	4.41516	4.41516	3.91362
4.41516	5.9	2.8904	5.53469	4.86526	6.01684	3.54	2.8904	2.63856	4.08764	3.54	3.33754	4.72	2.8904	5.9	4.08764	3.73149	4.08764	4.25455	3.91362
4.25455	5.7808	2.63856	5.9	4.86526	7.55569	3.54	3.33754	2.36	4.86526	4.25455	3.33754	3.91362	3.33754	5.9	3.91362	3.33754	4.72	4.25455	3.33754
3.91362	5.27712	2.8904	5.00632	4.25455	7.82723	4.41516	4.25455	4.41516	2.63856	4.25455	3.54	3.73149	3.33754	6.01684	3.91362	3.91362	4.86526	4.41516	3.91362
4.08764	4.86526	4.86526	5.1435	4.25455	7.27401	4.86526	3.73149	2.63856	2.8904	4.25455	3.91362	4.72	2.63856	5.9	4.08764	3.33754	3.54	4.25455	3.54
4.25455	4.25455	2.63856	4.86526	4.72	7.82723	5.00632	3.33754	3.33754	2.63856	3.54	4.08764	4.25455	2.63856	6.01684	4.25455	4.41516	4.08764	4.41516	3.73149
4.41516	5.40744	2.8904	4.86526	4.72	4.72	4.25455	2.8904	2.8904	4.08764	4.41516	3.54	3.73149	5.00632	5.53469	3.91362	2.8904	4.41516	4.25455	4.25455
4.25455	5.7808	2.63856	3.73149	4.72	4.25455	3.54	2.63856	2.63856	5.1435	4.86526	4.25455	4.86526	5.40744	5.9	4.08764	5.00632	3.54	4.25455	3.33754
3.91362	5.40744	2.8904	5.7808	3.73149	4.41516	2.8904	4.25455	2.63856	2.8904	3.54	3.33754	3.91362	5.40744	5.53469	4.25455	2.8904	4.25455	4.25455	3.33754
4.25455	5.00632	2.63856	6.01684	3.73149	4.41516	3.33754	3.54	2.63856	2.63856	4.41516	3.33754	3.91362	5.53469	5.40744	3.91362	4.86526	4.86526	4.41516	3.54
4.86526	4.72	2.8904	6.13146	4.41516	4.25455	3.54	3.54	3.73149	3.54	4.25455	3.91362	4.41516	5.53469	5.27712	4.08764	2.8904	4.86526	4.41516	3.91362
4.25455	4.86526	5.27712	3.54	4.25455	4.25455	4.86526	3.33754	3.33754	4.86526	3.54	4.08764	3.91362	4.08764	4.25455	4.25455	4.86526	3.33754	4.08764	3.73149
4.86526	4.86526	2.63856	6.13146	4.72	4.25455	3.54	3.91362	2.63856	2.63856	4.41516	3.54	4.41516	2.8904	4.25455	4.25455	3.33754	4.08764	4.41516	3.73149
4.86526	5.1435	2.8904	3.33754	4.41516	4.25455	2.8904	3.54	2.63856	3.33754	4.41516	3.33754	3.91362	3.33754	5.1435	4.08764	4.86526	3.33754	4.41516	3.33754
4.25455	5.00632	2.63856	6.46313	4.25455	4.25455	3.33754	3.54	2.63856	3.54	3.54	3.33754	4.72	3.33754	9.80182	4.41516	3.33754	3.73149	4.25455	3.33754
4.86526	5.1435	2.8904	6.01684	4.41516	4.25455	2.8904	3.33754	2.63856	5.1435	4.25455	4.25455	3.91362	2.8904	10.0819	4.25455	4.86526	3.33754	4.41516	3.54
4.08764	5.00632	2.63856	5.9	3.73149	3.73149	4.25455	3.54	2.63856	2.8904	4.25455	3.33754	4.08764	4.86526	9.73053	4.25455	3.33754	3.33754	4.41516	3.33754
4.25455	4.86526	3.33754	5.27712	4.72	3.91362	5.1435	3.54	2.63856	3.33754	3.54	2.8904	4.25455	5.00632	9.51346	4.25455	2.8904	4.08764	4.08764	3.91362
4.25455	4.86526	2.8904	3.33754	4.25455	4.86526	5.00632	3.54	4.41516	4.08764	4.25455	3.33754	4.72	5.00632	10.0819	4.25455	4.86526	2.8904	4.86526	4.08764
3.54	4.86526	4.86526	6.77858	4.25455	4.86526	3.54	3.73149	3.33754	5.00632	3.54	4.25455	4.25455	5.40744	10.0126	3.91362	3.33754	3.33754	4.25455	3.54
4.08764	4.86526	5.00632	6.77858	4.41516	5.00632	2.8904	3.54	3.33754	2.8904	4.25455	4.25455	4.25455	5.00632	10.0126	4.25455	4.25455	3.33754	4.86526	3.54
3.73149	4.86526	4.86526	6.35449	4.72	5.40744	3.33754	3.33754	3.33754	3.33754	4.41516	3.54	4.08764	5.1435	10.0819	4.25455	3.33754	3.33754	3.91362	3.33754
4.08764	4.72	2.8904	6.13146	4.41516	5.40744	2.8904	3.54	3.33754	4.08764	4.25455	2.8904	4.41516	4.86526	10.287	4.08764	5.00632	2.63856	4.86526	3.73149
4.08764	4.25455	2.63856	5.7808	3.54	6.01684	2.63856	3.54	3.33754	5.1435	2.63856	3.33754	3.91362	5.53469	10.62	3.91362	3.33754	4.08764	3.91362	3.73149
3.73149	4.25455	2.8904	3.33754	4.86526	6.77858	5.27712	3.33754	3.33754	3.33754	2.63856	3.33754	4.25455	5.00632	10.8791	3.73149	4.86526	2.63856	4.86526	3.54
4.08764	4.25455	2.63856	6.77858	4.72	6.46313	3.33754	3.54	3.33754	3.33754	2.8904	3.73149	4.72	4.08764	10.8791	4.08764	3.33754	2.8904	3.91362	4.25455
3.54	4.25455	3.33754	6.35449	3.91362	7.55569	2.8904	3.33754	3.33754	3.54	2.8904	4.25455	4.08764	2.63856	10.8791	4.25455	4.41516	2.8904	4.25455	3.91362
3.73149	4.25455	5.00632	3.33754	4.41516	7.82723	3.33754	3.33754	2.63856	5.27712	2.8904	4.25455	4.72	3.33754	10.8791	4.25455	3.33754	2.63856	4.86526	3.91362
3.91362	5.27712	4.86526	6.46313	3.91362	8.00315	3.54	3.73149	4.41516	2.8904	2.63856	4.25455	3.91362	3.33754	10.8791	3.91362	4.25455	2.63856	4.25455	3.91362
3.54	3.91362	2.63856	6.77858	3.73149	7.91568	3.33754	3.33754	3.54	2.8904	2.8904	4.25455	4.08764	2.8904	10.7503	4.25455	2.8904	3.33754	4.41516	3.54
4.08764	4.86526	2.8904	6.77858	4.25455	7.91568	2.8904	3.54	3.54	4.08764	2.8904	3.33754	4.25455	2.63856	10.62	4.25455	4.25455	3.54	4.41516	3.54
3.33754	4.72	2.63856	6.77858	3.91362	8.00315	4.86526	3.54	3.33754	5.1435	2.8904	3.33754	3.91362	4.86526	10.5542	4.25455	3.33754	3.54	3.91362	3.54
3.91362	4.72	2.8904	6.77858	4.25455	8.00315	4.86526	2.8904	3.33754	2.8904	2.8904	3.33754	4.25455	5.00632	10.4215	4.08764	4.25455	3.33754	4.86526	3.73149
3.33754	4.86526	2.63856	6.46313	4.25455	7.91568	3.33754	4.25455	3.54	3.33754	2.8904	3.33754	3.73149	4.86526	10.2191	4.25455	3.33754	4.41516	4.25455	3.54
4.08764	4.86526	2.8904	6.13146	3.54	7.91568	3.33754	3.54	3.33754	3.73149	2.8904	2.8904	4.72	4.25455	10.1507	4.25455	4.41516	3.33754	4.72	3.73149
3.33754	4.72	5.00632	5.9	3.54	7.91568	3.33754	3.33754	3.33754	5.1435	3.73149	4.86526	4.25455	4.25455	10.0819	3.91362	3.33754	3.54	4.41516	3.33754
3.33754	4.72	2.63856	3.33754	3.73149	7.17766	2.8904	3.73149	3.73149	3.33754	4.25455	5.1435	4.41516	4.25455	10.0819	3.73149	4.41516	3.73149	4.25455	3.91362
3.91362	4.72	2.8904	6.88052	3.54	7.27401	2.63856	3.54	2.8904	3.33754	2.8904	4.41516	3.73149	2.36	10.0126	4.08764	2.8904	3.33754	4.86526	3.54
3.54	4.72	2.8904	6.98097	4.25455	7.55569	4.25455	3.54	3.33754	3.54	3.33754	3.33754	4.86526	2.8904	9.80182	4.25455	4.25455	3.33754	4.25455	3.91362
3.33754	4.41516	2.63856	6.77858	4.41516	7.55569	4.41516	3.54	2.63856	5.53469	3.33754	3.33754	4.08764	3.33754	9.73053	4.25455	3.33754	3.33754	4.86526	3.33754
4.08764	4.72	2.8904	3.33754	3.73149	7.46298	4.86526	3.73149	2.63856	3.54	3.33754	2.8904	4.25455	3.33754	9.80182	3.91362	3.73149	3.54	4.25455	3.73149
3.33754	4.86526	5.00632	7.27401	4.41516	7.27401	4.86526	3.54	2.63856	2.8904	2.8904	5.00632	4.25455	3.54	10.0126	4.25455	3.33754	4.41516	4.86526	3.33754
2.8904	4.25455	4.86526	6.77858	4.41516	7.55569	3.73149	3.73149	2.63856	3.54	3.33754	5.27712	4.25455	3.54	9.51346	4.25455	4.25455	2.63856	4.86526	3.73149
3.91362	3.54	2.8904	6.88052	4.25455	7.91568	3.33754	3.54	4.25455	5.1435	2.8904	4.25455	3.73149	3.33754	9.29133	3.91362	3.33754	2.63856	4.25455	3.54
4.08764	4.41516	2.63856	3.33754	3.73149	4.25455	3.33754	3.54	2.63856	3.73149	2.8904	3.33754	4.72	3.33754	9.21609	4.08764	4.25455	2.63856	4.25455	3.54
3.33754	3.73149	2.8904	6.77858	3.54	4.41516	3.33754	3.54	3.33754	3.54	2.8904	3.33754	4.25455	2.63856	9.51346	4.41516	3.33754	2.8904	4.41516	4.08764
4.08764	3.73149	2.63856	7.55569	3.54	4.72	3.33754	3.73149	3.33754	5.40744	2.8904	2.8904	4.86526	2.36	9.29133	4.25455	3.73149	3.54	4.41516	3.54
3.33754	4.72	2.63856	7.55569	4.25455	4.25455	2.8904	3.54	3.33754	3.33754	2.8904	2.63856	4.25455	4.25455	8.34386	4.25455	2.8904	3.54	3.91362	3.54
2.8904	4.72	3.33754	6.88052	4.25455	4.41516	3.33754	3.73149	2.63856	3.54	2.8904	3.33754	4.25455	4.72	8.34386	4.41516	3.91362	3.54	4.86526	3.54
3.91362	4.41516	2.8904	6.77858	4.25455	3.91362	2.63856	3.54	2.63856	4.86526	2.8904	5.00632	3.91362	4.41516	8.34386	4.25455	3.33754	3.73149	4.86526	3.33754
3.54	4.25455	5.00632	3.33754	4.25455	3.91362	4.25455	3.54	2.63856	3.54	2.63856	5.1435	4.25455	4.72	8.34386	3.91362	4.25455	3.54	4.25455	3.54
3.54	4.25455	4.86526	7.17766	4.25455	5.9	4.25455	3.54	4.41516	5.1435	2.63856	3.33754	4.25455	4.86526	8.34386	4.72	3.33754	3.33754	3.91362	3.33754
3.91362	3.91362	2.63856	7.27401	4.41516	7.08	4.86526	3.73149	3.33754	3.54	2.8904	2.8904	4.72	4.86526	8.34386	4.25455	4.08764	3.33754	4.86526	3.33754
3.91362	3.33754	2.8904	7.55569	4.41516	7.55569	4.41516	3.54	2.63856	4.72	3.33754	3.33754	3.73149	4.86526	8.26	4.72	3.33754	4.41516	4.25455	3.54
3.33754	3.33754	2.63856	7.46298	4.25455	7.46298	3.54	3.54	3.33754	3.54	2.8904	3.33754	4.86526	4.72	5.9	4.25455	3.91362	2.36	4.41516	3.54
3.91362	3.33754	2.63856	7.46298	3.91362	7.55569	2.8904	3.54	3.33754	4.72	3.54	3.33754	3.91362	5.27712	5.9	4.25455	3.33754	2.63856	4.25455	3.54
3.54	4.41516	3.33754	6.88052	4.41516	6.77858	3.33754	3.33754	3.33754	3.54	3.54	2.8904	4.25455	5.27712	5.9	4.25455	4.25455	3.33754	3.91362	3.91362
3.33754	4.72	2.8904	3.33754	4.25455	7.27401	2.63856	3.33754	3.33754	4.72	3.33754	3.54	4.25455	4.72	5.9	4.41516	3.33754	3.33754	4.86526	3.33754
4.08764	4.72	5.00632	7.27401	4.25455	7.55569	4.25455	3.73149	3.33754	3.54	4.25455	4.08764	4.41516	4.86526	6.01684	4.25455	3.91362	3.33754	4.25455	3.54
3.91362	4.86526	2.8904	7.55569	4.25455	7.82723	4.86526	3.54	3.33754	4.41516	3.54	5.00632	4.08764	3.54	6.35449	4.25455	3.33754	3.33754	4.86526	3.54
4.08764	4.86526	2.8904	7.46298	3.91362	7.27401	4.25455	3.54	3.33754	3.54	4.25455	3.33754	4.25455	3.33754	6.35449	4.41516	3.33754	3.33754	4.25455	4.08764
3.73149	3.54	2.63856	3.33754	3.73149	7.55569	3.33754	3.54	3.33754	4.25455	4.25455	3.33754	4.41516	4.72	6.01684	4.41516	3.33754	3.33754	4.86526	3.33754
3.33754	3.33754	2.8904	7.82723	3.73149	7.82723	3.33754	3.54	2.63856	4.08764	2.8904	3.33754	4.25455	4.25455	5.9	4.25455	3.33754	2.8904	4.25455	4.08764
3.33754	3.33754	3.33754	7.17766	3.54	8.26	4.41516	4.08764	2.63856	4.86526	2.8904	3.33754	4.41516	4.86526	5.9	4.25455	3.33754	3.33754	4.86526	3.33754
3.33754	4.41516	5.40744	4.08764	3.54	8.34386	4.86526	3.73149	2.63856	4.08764	2.8904	4.08764	4.25455	3.33754	5.9	3.91362	3.33754	3.33754	4.25455	4.25455
3.54	4.86526	4.86526	7.46298	4.41516	8.34386	4.41516	3.54	3.73149	4.41516	3.33754	4.25455	4.72	3.33754	5.9	4.86526	3.33754	3.33754	4.86526	3.54
3.33754	4.25455	2.63856	6.88052	4.25455	8.59053	4.41516	3.54	3.33754	4.08764	3.33754	3.33754	4.25455	3.33754	5.9	4.25455	3.33754	3.54	4.25455	3.54
3.54	4.25455	2.8904	7.46298	3.91362	8.83031	3.33754	3.33754	3.33754	4.86526	2.8904	3.33754	4.25455	3.33754	5.9	4.41516	3.33754	4.25455	4.86526	3.33754
4.08764	3.54	2.63856	3.54	3.73149	8.67119	3.33754	3.54	3.33754	4.08764	3.33754	3.33754	4.72	3.33754	6.01684	4.86526	3.33754	2.63856	4.25455	3.73149
3.54	3.33754	2.8904	7.55569	3.73149	9.06375	4.41516	4.08764	3.33754	3.91362	2.8904	3.33754	4.25455	3.33754	6.01684	4.25455	3.33754	2.8904	4.86526	3.54
3.33754	3.33754	2.63856	7.46298	4.41516	9.06375	4.86526	3.73149	3.54	3.54	3.33754	3.33754	4.25455	3.33754	5.7808	4.41516	3.33754	3.33754	4.25455	4.25455
3.33754	4.41516	2.63856	3.33754	4.72	8.5091	4.41516	3.73149	3.33754	4.41516	3.33754	3.33754	4.41516	3.33754	6.01684	4.41516	3.33754	3.73149	4.86526	4.08764
2.8904	4.86526	3.33754	7.55569	4.72	8.42689	3.33754	3.54	3.33754	3.91362	4.25455	3.33754	4.25455	3.33754	6.35449	4.41516	3.33754	4.41516	4.86526	4.08764
3.54	4.86526	3.33754	7.55569	4.25455	8.34386	3.33754	3.33754	4.25455	4.25455	3.73149	3.54	4.41516	3.33754	6.01684	4.41516	3.33754	2.8904	4.86526	3.54
3.33754	4.72	5.00632	7.55569	3.73149	7.91568	4.41516	3.33754	4.41516	3.33754	4.08764	3.54	4.25455	3.33754	5.9	4.41516	3.33754	3.54	4.25455	4.08764
3.33754	4.72	4.86526	7.55569	4.41516	7.82723	4.86526	3.73149	2.36	4.41516	2.8904	4.25455	3.91362	3.54	5.9	4.25455	3.33754	3.54	4.41516	3.54
3.33754	4.72	2.63856	7.08	4.72	7.55569	4.41516	3.33754	3.33754	3.54	3.33754	3.33754	4.72	3.54	5.9	4.41516	2.63856	3.33754	4.86526	4.25455
3.54	4.72	2.8904	3.33754	4.41516	7.46298	4.08764	3.54	3.33754	4.41516	2.8904	3.33754	4.25455	3.73149	5.9	4.41516	3.54	3.33754	4.86526	3.33754
3.91362	4.72	2.63856	7.55569	4.41516	7.55569	3.54	3.54	3.33754	3.54	3.33754	3.33754	4.86526	3.73149	5.9	4.25455	3.33754	3.33754	4.86526	4.25455
3.73149	4.25455	3.33754	7.91568	4.72	7.55569	3.33754	3.54	2.36	3.91362	3.54	2.8904	4.25455	3.54	4.86526	4.86526	3.54	2.8904	4.86526	3.33754
3.33754	4.25455	3.54	7.55569	4.72	7.82723	4.86526	3.54	4.08764	3.54	4.08764	3.33754	4.41516	4.86526	4.25455	4.25455	3.33754	2.63856	4.86526	4.08764
3.33754	3.33754	3.54	7.82723	4.41516	7.55569	4.86526	3.33754	3.33754	4.41516	4.08764	3.33754	4.72	2.63856	4.41516	4.41516	3.33754	2.63856	5.00632	3.33754
3.33754	2.63856	5.00632	7.55569	4.86526	3.54	4.41516	3.54	2.63856	3.54	5.00632	3.33754	4.72	2.63856	5.40744	4.86526	3.33754	3.91362	4.86526	3.33754
3.33754	2.63856	4.41516	7.55569	4.72	3.73149	3.73149	3.33754	3.33754	3.73149	4.41516	3.33754	4.41516	2.63856	4.25455	4.25455	3.33754	4.25455	4.25455	3.33754
3.54	4.25455	2.63856	3.33754	4.72	4.41516	3.33754	3.73149	3.33754	3.54	3.54	3.33754	4.41516	2.63856	4.25455	4.25455	3.33754	3.91362	4.86526	3.33754
3.33754	4.25455	2.63856	7.82723	4.72	4.72	4.25455	3.33754	3.33754	3.91362	4.08764	3.33754	4.25455	2.63856	4.25455	4.25455	3.54	4.25455	4.86526	3.54
3.33754	4.41516	2.63856	8.26	4.86526	4.41516	4.86526	3.73149	2.36	3.54	5.00632	3.33754	4.25455	2.63856	4.25455	4.41516	3.33754	4.86526	3.91362	3.33754
3.33754	4.72	2.8904	7.82723	4.86526	4.72	4.86526	3.33754	2.63856	4.25455	3.54	3.33754	4.25455	2.8904	4.41516	4.41516	3.33754	4.25455	4.25455	3.33754
3.33754	4.41516	3.33754	3.33754	4.72	4.25455	4.41516	3.54	2.36	3.54	4.08764	3.33754	4.25455	2.8904	4.25455	4.25455	3.33754	2.36	5.00632	3.33754
2.63856	4.25455	2.8904	7.46298	4.72	4.25455	4.41516	3.33754	2.63856	3.54	4.41516	3.33754	4.72	3.54	4.25455	4.41516	3.33754	3.33754	5.00632	3.33754
3.33754	4.25455	3.54	7.91568	5.1435	4.41516	3.54	3.33754	3.33754	3.54	3.54	3.33754	4.25455	3.54	8.42689	4.41516	3.33754	3.54	4.25455	3.33754
3.33754	4.25455	4.86526	8.17528	5.40744	3.91362	3.33754	3.33754	3.33754	3.73149	4.08764	3.33754	4.25455	3.73149	8.67119	4.25455	3.33754	3.33754	5.00632	4.08764
3.33754	3.54	3.33754	7.46298	4.86526	3.91362	4.25455	3.33754	3.33754	3.73149	3.54	3.33754	4.72	4.08764	8.9088	4.25455	3.33754	3.54	5.00632	3.33754
3.33754	3.73149	3.33754	7.82723	4.72	5.9	4.86526	3.33754	3.33754	3.91362	3.91362	3.33754	4.25455	3.91362	9.29133	4.41516	3.33754	3.54	5.00632	4.08764
3.33754	2.8904	3.54	3.33754	4.72	7.91568	4.86526	3.33754	3.73149	3.91362	4.08764	3.33754	4.41516	3.91362	9.80182	4.25455	3.54	3.73149	5.00632	3.33754
3.33754	2.63856	3.33754	8.26	5.40744	8.26	5.00632	3.33754	3.33754	4.25455	4.08764	3.33754	4.25455	4.41516	10.0819	4.25455	3.33754	3.73149	4.86526	3.91362
3.54	2.63856	3.54	3.33754	5.27712	8.26	5.00632	3.54	2.8904	4.08764	3.91362	3.33754	4.25455	4.25455	9.44	4.41516	3.54	4.86526	5.00632	3.33754
3.54	3.73149	3.33754	7.82723	4.86526	8.34386	4.86526	3.33754	3.33754	3.73149	3.33754	3.33754	4.25455	3.54	9.44	4.25455	3.33754	5.1435	5.00632	3.73149
3.33754	4.25455	3.33754	8.26	4.72	8.59053	3.73149	3.54	3.33754	3.54	3.54	3.33754	4.25455	3.73149	9.44	4.25455	3.33754	4.86526	4.86526	3.33754
3.33754	4.25455	3.33754	8.26	5.40744	8.59053	3.54	3.33754	3.33754	3.91362	4.08764	3.33754	4.72	4.25455	9.51346	4.41516	3.33754	5.1435	5.1435	3.54
3.33754	4.25455	2.04382	8.00315	5.53469	8.5091	3.33754	3.33754	3.33754	3.54	4.25455	3.33754	3.91362	3.91362	9.58637	4.25455	3.54	4.86526	4.86526	3.33754
3.33754	3.91362	1.66877	7.46298	5.00632	8.5091	4.25455	3.73149	3.33754	4.08764	3.33754	3.33754	4.25455	4.25455	9.73053	4.25455	3.54	4.86526	5.27712	4.08764
3.33754	3.73149	3.33754	3.33754	4.72	7.91568	4.86526	3.33754	2.63856	3.54	3.54	3.33754	4.72	4.86526	9.80182	4.41516	3.33754	4.25455	5.27712	3.33754
2.8904	3.54	3.33754	8.26	5.7808	7.91568	4.41516	3.54	2.63856	3.33754	3.91362	3.33754	4.25455	4.86526	10.5542	3.73149	4.08764	3.91362	5.1435	3.54
3.33754	2.63856	2.8904	7.82723	5.7808	7.91568	5.27712	3.33754	2.63856	3.54	3.33754	3.33754	4.41516	3.54	10.5542	4.41516	3.33754	3.73149	5.00632	3.33754
3.33754	2.63856	5.27712	3.33754	5.27712	7.46298	4.41516	3.33754	2.63856	4.08764	3.54	3.33754	4.41516	3.73149	10.5542	4.72	3.54	3.73149	5.27712	3.33754
2.8904	3.73149	2.36	8.00315	4.86526	7.46298	4.41516	3.33754	4.41516	3.54	3.33754	2.8904	4.25455	3.91362	10.62	4.41516	3.33754	4.25455	5.53469	3.33754
3.33754	4.25455	2.63856	7.55569	5.53469	7.55569	4.41516	3.54	2.8904	3.54	3.91362	2.63856	4.25455	3.73149	10.8149	4.25455	4.08764	3.91362	5.00632	3.73149
3.33754	3.91362	3.33754	7.46298	5.27712	4.08764	5.9	3.33754	3.33754	3.54	4.08764	4.41516	4.72	3.73149	10.62	4.25455	3.33754	3.73149	5.00632	3.33754
3.33754	3.73149	3.33754	3.33754	4.86526	3.91362	5.1435	3.54	3.33754	3.73149	3.54	2.63856	4.25455	3.91362	10.5542	4.25455	3.91362	4.25455	5.7808	3.33754
2.8904	3.73149	3.33754	7.46298	5.9	4.25455	4.41516	3.33754	3.33754	3.33754	3.33754	4.25455	4.72	3.73149	10.62	4.41516	3.33754	4.25455	5.00632	3.33754
2.63856	4.08764	3.33754	7.55569	5.27712	4.41516	4.41516	3.54	3.33754	3.91362	3.91362	4.25455	3.91362	4.86526	9.80182	4.86526	4.41516	4.25455	5.00632	3.33754
2.8904	2.8904	2.8904	8.00315	4.86526	4.41516	4.86526	3.54	3.33754	3.54	4.08764	3.73149	4.41516	5.1435	10.0819	4.25455	3.33754	4.25455	5.7808	3.33754
2.8904	3.91362	3.33754	7.91568	5.9	4.25455	4.25455	3.54	3.33754	4.25455	3.54	4.25455	4.72	4.25455	10.0126	4.25455	3.54	4.25455	5.00632	3.33754
3.33754	4.25455	3.54	7.46298	5.9	3.33754	6.35449	3.54	3.33754	3.54	3.33754	4.25455	4.25455	4.25455	10.0819	4.41516	3.33754	4.25455	5.00632	3.54
3.33754	4.25455	3.33754	7.27401	6.01684	3.33754	5.40744	3.33754	3.54	3.91362	3.91362	4.25455	4.41516	4.86526	9.51346	4.86526	2.8904	4.25455	5.9	3.54
3.33754	4.25455	2.8904	3.33754	5.7808	2.8904	4.72	3.54	3.33754	3.33754	4.08764	4.25455	4.72	4.41516	8.34386	5.00632	4.41516	4.25455	5.00632	3.33754
2.8904	4.25455	1.66877	8.00315	5.7808	3.33754	4.86526	3.54	3.33754	3.54	3.54	3.91362	3.73149	5.1435	8.34386	4.25455	3.33754	4.25455	5.27712	3.73149
2.63856	4.25455	2.36	3.33754	5.00632	4.08764	6.01684	3.33754	2.63856	3.54	3.73149	4.25455	4.72	5.1435	8.34386	4.41516	4.08764	3.91362	6.01684	3.33754
2.8904	2.63856	2.63856	8.42689	4.72	4.72	3.91362	3.33754	2.63856	3.33754	3.54	4.25455	4.25455	5.7808	7.55569	4.86526	3.33754	4.25455	5.27712	3.54
3.33754	2.63856	2.63856	7.91568	5.9	4.25455	4.86526	3.33754	2.63856	3.33754	3.54	4.25455	4.41516	5.1435	7.82723	4.25455	4.08764	4.25455	6.01684	3.54
3.33754	3.54	2.63856	7.82723	5.9	4.25455	4.86526	3.54	2.63856	3.73149	4.08764	4.25455	4.25455	5.1435	7.91568	4.25455	3.54	4.25455	5.7808	3.33754
2.8904	3.54	2.63856	7.27401	5.9	4.25455	5.9	3.33754	2.63856	3.33754	4.08764	4.25455	4.25455	4.72	7.91568	4.41516	3.73149	4.25455	6.01684	3.33754
2.8904	3.54	2.63856	3.33754	6.35449	3.91362	4.25455	3.33754	3.33754	3.91362	4.08764	4.25455	4.25455	5.27712	7.91568	4.86526	4.08764	3.91362	5.7808	3.33754
3.33754	3.73149	2.8904	8.59053	6.01684	5.53469	4.86526	3.33754	3.54	3.54	3.54	4.25455	4.72	4.41516	7.91568	4.25455	4.25455	4.25455	6.01684	3.33754
2.8904	4.25455	2.63856	7.91568	6.35449	8.67119	4.41516	3.73149	3.33754	4.08764	4.25455	4.41516	4.25455	4.72	7.91568	4.41516	3.73149	4.25455	5.7808	3.33754
2.8904	4.25455	3.54	7.82723	6.77858	8.9088	5.40744	3.33754	3.54	3.33754	4.25455	4.41516	4.41516	4.86526	8.00315	4.86526	4.25455	4.25455	5.7808	3.33754
2.8904	4.25455	3.33754	3.33754	6.77858	9.06375	4.41516	3.54	3.54	3.54	4.08764	4.41516	4.25455	3.91362	8.26	4.25455	4.08764	4.25455	6.01684	3.33754
2.63856	4.25455	5.40744	8.67119	6.35449	8.9088	4.25455	3.33754	3.73149	3.33754	4.25455	4.41516	4.25455	4.25455	8.26	4.25455	4.25455	4.25455	5.9	3.33754
2.63856	4.25455	4.86526	8.42689	6.77858	9.06375	4.25455	3.73149	3.33754	3.33754	4.41516	4.41516	4.25455	4.86526	8.26	4.41516	3.54	4.41516	5.9	3.54
2.63856	4.25455	2.8904	7.82723	6.88052	9.29133	5.00632	3.33754	3.33754	3.33754	4.25455	4.41516	4.25455	4.41516	8.26	4.86526	4.25455	4.25455	6.01684	3.33754
2.63856	4.86526	3.33754	3.33754	6.98097	9.51346	4.41516	3.91362	2.63856	3.54	4.08764	4.41516	3.91362	4.25455	7.55569	4.25455	3.91362	4.25455	6.35449	3.54
3.33754	2.63856	3.33754	8.67119	6.77858	9.58637	4.41516	3.33754	3.33754	3.54	4.25455	4.41516	4.41516	4.25455	7.55569	4.25455	4.25455	4.25455	6.01684	3.54
2.63856	2.8904	3.33754	8.9088	7.08	9.51346	4.25455	3.54	3.33754	3.91362	4.08764	4.41516	4.41516	3.91362	7.27401	3.91362	3.54	4.25455	6.35449	3.33754
2.8904	3.54	2.8904	8.42689	7.46298	4.41516	4.86526	3.33754	3.33754	3.54	3.91362	4.41516	4.25455	4.25455	7.17766	4.25455	4.25455	4.25455	6.35449	3.33754
2.63856	3.54	3.33754	8.34386	7.27401	4.86526	4.41516	3.73149	3.33754	4.08764	3.54	4.41516	3.73149	3.91362	7.55569	4.41516	3.91362	4.25455	6.35449	3.54
2.04382	3.73149	2.8904	7.82723	7.27401	4.25455	4.86526	3.33754	3.33754	3.33754	3.73149	4.25455	3.91362	3.91362	7.17766	4.25455	3.91362	4.25455	6.35449	3.33754
2.63856	3.73149	2.8904	3.33754	7.55569	3.73149	4.25455	3.91362	3.33754	3.54	4.08764	4.25455	4.25455	4.41516	7.27401	4.41516	3.54	4.25455	6.35449	3.33754
2.63856	3.73149	2.36	9.06375	7.27401	4.86526	4.72	3.33754	2.8904	3.54	3.54	4.25455	4.25455	3.91362	7.46298	4.25455	4.25455	4.25455	6.46313	3.54
2.63856	3.73149	3.54	8.9088	7.55569	9.29133	4.25455	3.54	2.63856	3.33754	3.54	4.25455	4.25455	4.25455	7.46298	4.41516	4.25455	4.25455	5.7808	3.73149
2.63856	3.91362	3.54	8.26	7.73778	9.51346	4.86526	3.33754	2.63856	3.54	3.91362	4.25455	4.41516	4.25455	7.46298	4.72	4.25455	4.25455	6.77858	3.33754
2.63856	3.73149	3.33754	3.33754	7.91568	10.0126	4.25455	4.25455	2.8904	3.33754	4.08764	4.25455	4.25455	5.27712	7.46298	4.72	4.25455	4.25455	5.7808	3.33754
3.33754	3.73149	5.27712	9.06375	8.26	10.0819	4.25455	3.33754	4.41516	3.33754	3.54	4.25455	4.25455	5.9	7.46298	4.41516	4.25455	4.25455	5.9	2.8904
2.8904	4.86526	4.86526	9.29133	8.26	10.0126	4.86526	4.25455	3.33754	3.33754	3.54	4.25455	4.25455	3.33754	7.46298	3.91362	4.25455	3.91362	6.46313	4.25455
2.63856	2.63856	2.8904	8.67119	8.00315	9.80182	4.86526	3.33754	2.8904	3.33754	3.73149	4.25455	3.73149	3.91362	7.46298	5.00632	4.41516	3.91362	6.77858	2.04382
3.33754	2.63856	2.8904	8.00315	7.82723	9.80182	4.25455	3.91362	3.33754	3.33754	4.08764	4.25455	4.41516	4.86526	7.46298	4.86526	3.91362	4.86526	6.01684	3.91362
3.33754	2.63856	3.54	3.33754	8.34386	9.58637	4.25455	3.33754	3.33754	3.33754	3.54	4.25455	4.25455	5.00632	6.67509	4.72	4.25455	4.25455	6.77858	1.66877
2.63856	3.54	3.33754	9.29133	8.26	9.51346	4.25455	4.25455	3.33754	3.33754	3.73149	4.25455	3.73149	4.25455	6.67509	5.00632	4.25455	4.25455	6.98097	3.73149
2.63856	3.54	3.54	9.80182	8.26	4.86526	4.86526	3.33754	3.33754	3.54	3.54	4.25455	4.25455	5.40744	6.67509	5.1435	4.25455	4.41516	6.13146	1.18
2.63856	3.54	2.63856	9.29133	8.59053	4.86526	4.72	4.25455	3.54	3.33754	3.54	4.25455	4.25455	3.54	6.67509	4.86526	4.41516	4.25455	6.46313	3.33754
2.63856	3.54	2.63856	9.06375	8.26	4.25455	4.25455	3.33754	3.33754	3.33754	3.33754	4.41516	3.73149	3.73149	6.67509	4.86526	3.91362	4.25455	6.77858	1.66877
2.63856	3.73149	2.63856	8.59053	8.59053	3.73149	4.41516	3.73149	2.8904	3.33754	3.33754	4.41516	4.25455	3.54	6.77858	5.00632	3.91362	4.25455	7.27401	3.91362
2.63856	3.73149	2.8904	3.33754	8.26	10.0126	4.41516	3.33754	2.63856	2.8904	3.33754	4.41516	4.25455	3.54	7.08	5.00632	4.25455	4.25455	7.27401	2.63856
2.63856	3.73149	2.8904	9.29133	8.26	10.1507	4.86526	3.54	3.33754	2.8904	3.73149	4.86526	4.25455	5.00632	7.08	4.86526	3.91362	3.91362	6.46313	3.73149
2.8904	3.54	3.33754	8.83031	8.34386	10.0819	4.41516	3.33754	3.33754	3.33754	3.54	4.86526	4.25455	3.33754	7.08	4.72	3.54	4.25455	6.77858	3.33754
2.63856	3.54	3.33754	9.29133	8.26	10.3545	4.86526	3.73149	3.33754	3.33754	3.54	4.86526	3.73149	3.54	6.67509	5.00632	3.91362	3.91362	6.77858	3.73149
2.63856	3.54	3.33754	9.51346	8.26	10.0126	4.25455	3.33754	2.63856	3.33754	3.54	5.00632	4.25455	3.54	6.67509	5.00632	3.33754	4.25455	7.27401	3.33754
2.63856	3.54	3.54	8.98661	7.82723	3.91362	4.72	3.54	2.63856	3.33754	3.33754	4.86526	4.41516	3.54	6.67509	4.86526	3.91362	3.91362	6.88052	3.33754
2.8904	3.54	3.54	3.33754	7.91568	4.86526	4.72	2.63856	2.63856	3.33754	3.33754	4.25455	4.25455	4.08764	6.35449	4.86526	3.33754	4.86526	6.35449	3.33754
3.33754	3.54	3.33754	8.9088	7.55569	4.86526	4.86526	3.91362	2.63856	2.63856	3.54	4.86526	3.54	3.73149	6.35449	5.00632	4.08764	4.41516	7.27401	3.33754
2.63856	3.54	2.8904	9.29133	7.64727	4.41516	4.72	2.63856	3.91362	3.54	3.33754	4.86526	4.72	4.41516	6.67509	5.1435	3.54	4.25455	6.88052	3.33754
2.8904	3.54	3.33754	9.29133	7.55569	4.25455	3.91362	3.91362	3.33754	3.33754	3.54	5.00632	3.73149	3.73149	6.67509	4.86526	3.91362	4.25455	7.27401	3.33754
2.63856	3.54	5.00632	9.73053	7.64727	3.73149	4.72	3.33754	3.33754	3.33754	3.54	4.86526	4.72	3.73149	6.67509	4.72	3.73149	4.25455	7.08	3.33754
2.8904	3.54	4.72	8.98661	7.64727	9.51346	4.86526	4.25455	3.33754	3.33754	3.33754	4.25455	4.25455	3.54	6.67509	5.1435	3.54	4.86526	7.27401	3.33754
2.8904	3.73149	2.63856	3.54	6.98097	9.51346	4.72	3.33754	3.33754	3.33754	3.33754	4.86526	4.41516	3.54	6.67509	5.40744	3.54	4.25455	7.46298	3.33754
3.33754	4.25455	2.8904	8.59053	6.77858	9.73053	3.73149	4.25455	2.63856	3.33754	3.33754	4.86526	4.25455	3.73149	6.46313	5.00632	3.73149	4.25455	7.08	3.91362
3.33754	4.72	2.63856	8.98661	7.46298	9.73053	3.91362	3.33754	2.63856	3.33754	3.33754	4.86526	4.25455	3.91362	6.67509	4.86526	3.33754	4.86526	7.55569	3.33754
3.33754	4.86526	2.8904	8.98661	7.17766	9.73053	4.72	4.25455	3.33754	3.33754	3.33754	5.00632	3.73149	3.54	6.67509	5.40744	4.08764	4.25455	7.55569	3.73149
2.63856	2.8904	2.63856	3.33754	7.27401	10.0819	4.41516	3.33754	3.33754	3.33754	3.33754	4.25455	4.25455	3.33754	6.67509	5.7808	3.54	4.86526	6.67509	3.33754
2.63856	4.25455	2.8904	8.59053	7.46298	10.0126	4.25455	4.41516	3.33754	2.8904	3.33754	4.25455	3.73149	4.08764	6.67509	5.40744	3.73149	4.41516	8.00315	3.33754
2.63856	4.25455	2.63856	8.98661	7.17766	9.80182	5.00632	2.63856	2.63856	3.54	3.33754	4.41516	4.25455	4.86526	6.67509	5.53469	3.91362	4.25455	7.46298	3.33754
2.8904	2.63856	2.8904	8.5091	7.55569	10.0126	4.86526	4.86526	2.63856	3.33754	3.33754	4.86526	3.91362	4.72	6.67509	5.00632	4.08764	4.86526	6.67509	3.33754
2.8904	4.25455	3.33754	3.54	7.73778	9.80182	4.86526	3.33754	2.63856	3.33754	3.33754	4.86526	4.25455	4.72	6.67509	5.1435	3.91362	4.25455	7.82723	3.33754
2.8904	3.33754	2.63856	8.59053	7.46298	9.58637	5.7808	4.25455	2.63856	3.33754	3.54	4.86526	4.25455	4.72	6.67509	5.53469	3.54	4.25455	7.27401	4.08764
2.63856	2.8904	2.8904	3.33754	6.77858	9.80182	3.73149	3.33754	4.72	3.54	3.33754	5.00632	4.72	4.41516	6.46313	5.1435	3.91362	4.86526	7.46298	3.33754
2.63856	2.63856	3.33754	8.9088	7.27401	3.91362	3.91362	4.86526	3.33754	2.8904	3.54	4.86526	4.25455	3.91362	6.01684	5.53469	3.91362	4.86526	7.82723	3.54
2.63856	3.54	2.8904	8.83031	6.77858	3.54	4.25455	3.33754	3.33754	3.33754	3.33754	4.86526	4.72	3.33754	5.9	5.7808	4.41516	4.41516	8.26	3.33754
2.63856	2.63856	3.33754	8.59053	6.35449	4.08764	4.25455	4.86526	3.33754	3.33754	3.33754	4.41516	4.41516	3.33754	6.01684	5.53469	4.08764	4.72	7.27401	3.33754
2.8904	3.91362	3.33754	8.42689	6.01684	4.41516	4.25455	3.33754	2.8904	3.54	3.33754	4.86526	4.41516	3.54	6.13146	6.01684	4.25455	4.25455	7.55569	3.33754
2.63856	2.36	3.33754	3.54	7.08	4.86526	5.40744	4.72	3.33754	3.33754	3.54	4.86526	3.54	3.73149	6.01684	5.9	3.73149	4.86526	8.26	3.91362
2.63856	3.73149	3.33754	7.17766	7.08	3.91362	3.91362	2.63856	3.33754	3.54	3.33754	4.41516	3.73149	3.91362	5.9	5.7808	3.54	4.25455	7.55569	3.33754
2.63856	3.73149	3.33754	7.46298	7.55569	9.51346	4.25455	4.25455	3.33754	2.8904	3.33754	4.86526	3.54	4.25455	5.9	5.40744	3.91362	4.41516	7.91568	3.54
2.63856	2.63856	3.33754	7.91568	7.55569	9.51346	4.86526	2.63856	3.33754	3.33754	3.33754	4.86526	4.25455	4.25455	5.9	5.9	3.73149	4.86526	8.5091	3.33754
2.63856	3.73149	3.33754	8.5091	7.27401	9.51346	4.08764	4.25455	3.33754	3.33754	3.33754	4.86526	3.73149	4.25455	5.00632	5.7808	4.41516	4.86526	8.59053	3.91362
2.04382	3.73149	3.33754	8.59053	7.55569	9.51346	4.72	2.8904	3.33754	3.33754	3.33754	4.86526	4.25455	4.25455	4.86526	6.01684	3.91362	4.86526	7.91568	3.33754
2.63856	3.33754	3.33754	8.26	7.27401	9.73053	5.7808	4.08764	3.33754	3.33754	3.33754	4.86526	3.91362	4.25455	6.35449	6.01684	4.25455	4.86526	8.26	3.54
2.63856	2.63856	3.33754	8.67119	7.46298	9.73053	2.63856	3.33754	3.33754	3.54	3.33754	5.00632	4.25455	4.25455	5.7808	5.7808	4.25455	5.1435	8.5091	3.33754
2.04382	3.54	3.33754	8.26	7.17766	9.73053	4.86526	3.54	3.33754	2.63856	3.33754	4.86526	4.08764	4.25455	4.25455	5.9	3.33754	5.00632	7.64727	3.33754
1.66877	3.54	3.33754	3.33754	7.55569	9.58637	4.86526	3.33754	3.33754	3.33754	3.54	5.00632	3.54	4.41516	4.25455	5.9	4.41516	5.27712	8.5091	3.33754
2.63856	2.63856	3.33754	6.77858	7.73778	9.73053	4.86526	3.54	3.33754	3.33754	3.33754	4.86526	4.25455	4.41516	6.77858	5.9	3.91362	4.86526	7.82723	3.54
2.63856	4.25455	2.8904	7.17766	7.55569	9.80182	5.40744	2.63856	3.33754	3.33754	3.33754	5.00632	3.73149	4.25455	7.27401	5.9	4.41516	4.72	8.26	3.33754
2.63856	3.73149	3.33754	7.46298	7.55569	9.58637	5.40744	3.54	2.8904	2.8904	3.33754	5.1435	4.08764	3.54	7.46298	5.9	3.91362	4.41516	7.82723	3.33754
2.63856	2.8904	2.8904	7.82723	7.55569	9.44	5.00632	2.63856	2.63856	3.33754	3.33754	4.86526	4.25455	3.54	7.55569	5.9	4.25455	4.25455	8.5091	3.33754
2.63856	3.33754	2.8904	3.54	7.91568	9.44	5.53469	3.54	2.63856	2.63856	3.54	5.1435	3.73149	3.33754	8.34386	5.7808	3.54	4.25455	8.26	3.54
	2.36	3.33754	6.77858	7.91568	9.44	5.27712	2.8904	2.63856	3.33754	3.33754	4.86526	4.25455	3.33754	7.08	5.7808	3.33754	4.86526	7.91568	3.33754
	4.08764	3.33754	3.91362	7.55569	9.06375	5.9	3.33754	2.8904	2.8904	3.33754	5.1435	4.25455	3.33754	7.08	6.01684	4.25455	4.25455	8.5091	3.54
	3.73149	3.33754	5.00632	7.46298	8.98661	1.18	3.33754	4.41516	3.54	3.33754	4.86526	3.91362	3.33754	7.08	6.01684	3.33754	5.00632	8.00315	3.33754
	2.8904	5.27712	5.1435	7.17766	8.98661	6.01684	3.54	4.25455	2.63856	3.54	5.00632	4.08764	3.33754	7.46298	5.9	4.72	4.72	8.5091	3.54
	3.91362	2.63856	6.01684	7.91568	8.9088	5.40744	3.33754	4.72	3.33754	3.54	5.00632	3.91362	3.33754	7.46298	5.7808	3.33754	4.25455	7.91568	3.33754
	3.73149	2.8904	5.9	7.55569	8.42689	5.9	3.54	4.41516	2.63856	3.33754	5.00632	3.54	3.33754	7.46298	5.40744	4.41516	5.00632	7.91568	3.33754
	3.54	2.8904	6.35449	8.00315	8.34386	1.18	3.33754	4.25455	3.33754	3.33754	5.53469	4.41516	3.33754	7.46298	5.00632	3.33754	4.86526	8.5091	3.33754
	2.63856	3.33754	6.77858	8.34386	8.26	5.40744	3.33754	4.41516	3.33754	3.33754	5.40744	3.73149	3.33754	7.46298	6.01684	4.25455	5.00632	7.91568	3.33754
	2.63856	2.8904	6.46313	8.26	8.26	1.18	2.63856	3.91362	3.54	2.63856	5.1435	4.25455	3.33754	7.46298	5.9	3.33754	4.86526	8.26	3.54
	3.73149	3.33754	6.77858	8.00315	8.26	5.27712	3.73149	4.41516	3.33754	3.33754	5.00632	4.25455	3.54	7.46298	5.9	3.33754	5.27712	8.00315	4.08764
	3.73149	3.33754	4.08764	7.82723	7.82723	5.27712	2.63856	4.41516	3.33754	3.33754	5.1435	4.25455	3.54	7.46298	6.35449	4.41516	5.00632	8.9088	3.73149
	3.54	3.33754	5.1435	8.34386	7.27401	4.86526	3.33754	4.41516	2.8904	3.54	5.27712	3.54	3.33754	7.46298	6.35449	3.33754	5.27712	8.26	3.73149
	3.33754	3.33754	3.54	8.26	7.17766	4.86526	2.8904	4.41516	3.54	3.54	5.00632	3.73149	4.08764	7.27401	6.35449	3.91362	5.00632	7.55569	4.08764
	2.8904	3.33754	4.86526	8.34386	3.91362	4.86526	2.8904	4.72	2.8904	3.33754	5.00632	3.73149	4.08764	7.17766	6.67509	3.33754	5.40744	8.26	3.33754
	3.91362	3.33754	3.54	8.67119	3.54	4.86526	3.33754	4.86526	3.33754	3.33754	5.00632	4.25455	3.91362	7.08	6.01684	4.41516	4.86526	8.9088	3.33754
	3.54	2.8904	4.08764	8.34386	4.08764	4.41516	2.36	4.41516	2.63856	3.33754	5.00632	4.08764	3.54	6.98097	6.35449	3.33754	5.40744	9.06375	3.91362
	3.33754	3.33754	4.25455	8.67119	4.25455	4.86526	3.33754	4.72	3.54	3.33754	5.00632	3.54	3.54	6.88052	6.77858	3.33754	5.27712	9.29133	3.54
	2.63856	2.8904	4.41516	8.9088	8.26	5.00632	2.04382	4.86526	2.8904	3.33754	5.00632	3.54	3.54	6.77858	6.46313	3.91362	5.1435	9.29133	4.08764
	3.73149	3.33754	3.54	9.06375	7.64727	4.86526	3.33754	4.41516	3.33754	2.8904	5.40744	3.54	3.54	6.46313	6.77858	3.33754	5.40744	9.29133	4.08764
	3.54	2.8904	3.33754	8.83031	6.77858	5.1435	2.63856	4.72	2.63856	3.33754	5.40744	3.73149	3.91362	6.35449	7.08	3.33754	4.86526	9.51346	3.91362
	2.8904	3.33754	3.54	8.59053	4.41516	4.86526	2.63856	4.86526	3.33754	3.54	5.1435	3.73149	3.54	6.35449	6.77858	3.54	5.00632	9.29133	3.33754
	2.8904	2.8904	4.08764	9.06375	4.08764	4.86526	3.33754	4.86526	2.63856	4.08764	5.00632	4.08764	3.54	6.35449	6.98097	3.33754	5.00632	9.58637	3.54
	3.33754	3.33754	3.54	9.51346	7.46298	4.86526	2.63856	4.72	3.33754	3.33754	5.00632	4.25455	3.91362	6.35449	7.27401	4.41516	4.86526	9.80182	3.33754
	3.73149	3.33754	3.54	9.21609	7.46298	5.40744	3.33754	4.72	3.33754	3.33754	5.00632	3.54	3.54	7.27401	7.08	3.54	5.00632	9.51346	3.33754
	3.54	2.8904	3.54	9.51346	7.46298	5.1435	2.63856	4.86526	3.33754	3.33754	5.00632	4.08764	3.54	7.17766	6.98097	3.91362	5.00632	9.51346	3.54
	3.33754	2.8904	4.08764	9.58637	7.46298	5.40744	3.33754	4.86526	3.33754	3.33754	5.00632	3.73149	3.54	7.17766	7.27401	3.33754	4.86526	10.0819	3.33754
	2.8904	2.8904	3.91362	9.51346	7.27401	4.86526	2.63856	4.72	3.33754	3.33754	5.00632	3.54	3.33754	6.98097	7.27401	3.33754	5.27712	9.51346	3.33754
	3.33754	5.7808	3.33754	9.29133	7.46298	5.1435	3.33754	4.86526	3.33754	3.54	5.00632	3.33754	3.54	6.46313	7.17766	3.54	4.86526	9.51346	3.33754
	3.54	5.00632	3.54	9.51346	7.55569	5.27712	2.36	4.86526	3.54	3.33754	5.00632	3.73149	3.91362	6.67509	7.08	3.91362	5.00632	9.73053	3.33754
	3.54	5.40744	3.33754	9.87259	6.67509	4.86526	3.33754	4.72	3.54	3.33754	5.53469	3.54	3.54	6.67509	7.17766	3.33754	5.27712	9.73053	3.33754
	3.54	4.86526	3.33754	9.51346	5.9	5.1435	2.36	4.86526	3.33754	3.33754	5.7808	4.25455	3.54	6.67509	7.27401	3.91362	4.86526	9.58637	3.33754
	3.33754	5.40744	3.33754	9.29133	5.7808	5.1435	3.33754	4.86526	3.33754	3.54	5.53469	3.73149	3.91362	6.67509	7.17766	3.73149	5.27712	9.06375	3.33754
	3.33754	5.9	2.8904	9.73053	4.86526	5.1435	2.36	4.86526	3.33754	3.33754	5.53469	4.25455	3.54	6.67509	7.08	3.54	5.1435	9.44	3.91362
	3.33754	5.27712	3.33754	9.80182	4.41516	5.00632	3.54	4.86526	3.33754	3.33754	5.7808	3.33754	3.54	5.9	6.98097	3.54	5.27712	8.83031	3.33754
	3.54	5.40744	3.33754	9.58637	3.54	4.86526	2.63856	4.86526	3.33754	3.33754	5.53469	3.73149	3.91362	5.9	6.46313	4.08764	4.86526	8.59053	3.73149
	3.54	4.86526	3.33754	10.1507	6.01684	4.86526	3.54	4.72	3.73149	3.54	5.9	3.54	3.54	5.9	7.17766	3.91362	5.27712	9.29133	3.33754
	3.54	5.27712	2.63856	10.1507	5.00632	3.91362	2.63856	4.72	3.54	3.33754	6.01684	4.25455	3.91362	5.9	7.08	4.25455	4.86526	8.00315	3.33754
	3.33754	5.9	3.33754	10.0819	4.86526	4.25455	3.54	4.86526	3.33754	3.33754	5.9	3.73149	3.54	5.9	7.08	4.08764	5.40744	8.83031	3.33754
	3.54	5.27712	3.33754	10.4215	4.41516	4.86526	2.63856	5.27712	3.33754	3.33754	6.35449	4.25455	3.91362	6.01684	7.82723	4.72	5.1435	8.00315	3.73149
	3.54	5.40744	3.33754	10.1507	4.25455	4.86526	3.54	4.72	3.54	3.54	6.01684	4.08764	3.91362	6.35449	7.46298	3.54	5.40744	8.67119	4.08764
	2.8904	4.86526	2.8904	9.87259	4.25455	4.86526	2.04382	4.86526	3.33754	3.33754	6.35449	4.25455	3.91362	5.53469	8.34386	3.54	5.1435	8.26	3.91362
	3.54	5.27712	3.33754	9.73053	3.91362	4.41516	3.33754	5.40744	3.73149	3.33754	5.9	3.54	4.25455	4.72	7.08	3.33754	5.40744	8.00315	4.08764
	3.33754	4.86526	3.54	10.1507	3.73149	4.41516	1.66877	5.53469	3.33754	3.33754	6.35449	4.25455	3.54	5.9	6.88052	3.91362	5.27712	8.42689	3.73149
	2.8904	5.00632	2.63856	9.87259	4.86526	4.25455	3.33754	5.00632	4.25455	2.63856	6.13146	3.33754	4.25455	5.9	7.46298	4.41516	5.7808	8.26	3.54
	3.54	5.40744	3.33754	10.3545	4.25455	4.86526	2.04382	5.53469	3.54	3.33754	6.01684	4.41516	3.73149	5.9	7.17766	3.91362	5.7808	8.00315	3.33754
	3.54	4.86526	3.33754	10.1507	4.25455	4.25455	3.33754	4.86526	3.54	2.8904	5.9	3.73149	3.54	6.77858	7.08	4.86526	5.27712	8.26	4.08764
	3.54	5.00632	2.63856	9.87259	3.33754	4.25455	2.63856	5.27712	3.33754	3.33754	5.9	4.25455	3.54	7.46298	7.82723	4.41516	5.7808	8.26	3.33754
	3.33754	4.41516	2.63856	10.1507	3.73149	3.91362	3.33754	4.86526	3.54	3.33754	5.9	4.08764	3.33754	4.41516	7.82723	4.41516	5.27712	8.26	4.25455
	3.54	4.86526	3.33754	10.1507	3.91362	3.91362	2.63856	5.27712	3.33754	2.63856	5.9	3.73149	3.54	4.25455	8.26	4.41516	5.53469	8.26	4.25455
	3.54	5.27712	3.33754	9.80182	4.41516	3.91362	3.54	4.72	3.33754	3.33754	5.9	3.54	3.54	4.25455	8.34386	4.41516	5.53469	7.82723	3.91362
	3.54	4.41516	2.36	10.0126	4.41516	3.73149	2.63856	5.7808	3.54	3.33754	5.9	3.91362	3.73149	4.25455	8.34386	4.41516	6.01684	8.26	4.25455
	2.63856	4.86526	2.8904	10.1507	4.25455	3.73149	3.33754	5.00632	3.33754	3.33754	5.9	3.33754	3.91362	3.73149	8.26	4.41516	5.7808	7.91568	4.08764
	3.33754	5.27712	3.33754	9.80182	4.08764	3.91362	2.63856	5.53469	3.54	3.33754	5.9	4.08764	3.91362	3.73149	8.26	4.41516	6.13146	8.5091	4.41516
	3.33754	5.7808	3.33754	9.51346	3.33754	3.73149	3.54	4.72	2.8904	3.54	5.9	3.91362	3.73149	3.73149	8.26	4.41516	6.01684	8.00315	3.54
	3.33754	5.27712	3.33754	10.0126	3.73149	3.91362	2.8904	4.86526	3.33754	3.33754	5.9	4.08764	3.91362	3.54	8.26	4.41516	6.01684	8.59053	4.41516
	3.33754	5.7808	2.8904	9.80182	4.25455	3.73149	3.33754	5.27712	3.33754	2.8904	6.35449	4.08764	4.08764	3.54	8.26	3.91362	6.01684	8.59053	3.73149
	2.8904	5.9	2.8904	9.44	4.08764	3.91362	3.33754	4.72	3.54	2.8904	6.67509	3.54	3.54	3.73149	9.06375	4.41516	5.9	9.51346	4.41516
	3.33754	6.35449	3.33754	9.44	3.54	3.54	3.33754	5.53469	3.33754	2.63856	6.35449	3.54	3.91362	2.8904	8.26	4.25455	5.9	8.98661	4.08764
	3.33754	5.7808	3.33754	9.44	3.73149	3.91362	2.63856	4.86526	3.73149	2.8904	6.77858	3.73149	4.25455	3.33754	8.9088	4.41516	6.35449	9.73053	4.86526
	3.33754	5.9	3.33754	9.21609	4.08764	3.73149	3.33754	5.00632	3.33754	3.33754	6.67509	3.73149	3.91362	3.54	8.67119	4.41516	6.67509	9.29133	4.08764
	2.8904	6.35449	3.33754	8.42689	3.73149	3.54	2.36	5.27712	3.91362	2.63856	6.35449	4.08764	3.73149	3.73149	9.58637	3.91362	6.46313	9.58637	4.86526
	3.33754	6.35449	3.33754	8.34386	4.25455	3.91362	3.33754	5.7808	3.33754	3.33754	6.77858	4.25455	3.91362	3.54	9.51346	4.41516	6.35449	10.0126	3.54
	3.33754	5.9	3.33754	7.46298	4.25455	3.54	2.63856	5.7808	3.33754	3.33754	6.77858	4.08764	3.54	3.91362	8.42689	3.54	6.13146	10.3545	5.1435
	3.33754	6.35449	2.63856	7.27401	3.73149	3.91362	3.33754	5.27712	3.33754	3.33754	6.67509	3.54	3.91362	4.08764	9.44	3.54	5.9	10.62	4.08764
	3.33754	6.01684	2.8904	7.55569	4.25455	4.25455	2.63856	5.40744	3.54	3.33754	6.77858	3.73149	3.33754	3.54	9.51346	3.54	6.67509	10.3545	5.00632
	3.33754	5.9	3.33754	6.88052	4.41516	3.54	3.33754	5.9	3.33754	3.33754	6.88052	3.73149	3.33754	3.54	9.44	3.54	5.9	10.0819	4.08764
	3.33754	5.9	3.33754	6.35449	4.25455	3.91362	2.36	5.27712	3.54	2.63856	6.67509	4.08764	3.33754	3.54	9.44	3.54	6.77858	10.9429	4.86526
	3.33754	5.9	2.63856	5.7808	4.25455	4.25455	3.33754	5.9	2.8904	3.33754	6.77858	4.25455	3.54	3.73149	9.44	3.54	5.9	10.8149	3.54
	2.63856	5.9	2.63856	6.35449	4.72	3.54	2.63856	6.01684	3.33754	2.8904	6.88052	4.25455	3.33754	3.73149	10.2191	3.54	6.77858	11.2565	5.00632
	3.54	5.9	2.63856	5.9	4.08764	3.91362	3.33754	5.9	3.33754	2.8904	6.67509	3.54	3.54	3.73149	10.1507	3.33754	5.9	10.62	3.73149
	3.33754	5.9	2.8904	5.27712	3.54	4.25455	2.36	6.35449	3.33754	3.33754	6.67509	4.25455	3.54	3.54	10.0126	3.54	6.46313	11.6814	5.00632
	2.8904	6.35449	3.33754	5.00632	3.91362	3.33754	2.63856	6.01684	3.33754	2.8904	6.88052	3.73149	2.8904	3.73149	9.80182	3.33754	6.77858	10.8149	3.73149
	2.8904	5.7808	2.63856	4.41516	4.25455	3.54	2.36	6.13146	3.33754	3.33754	6.88052	3.73149	3.91362	3.54	10.3545	3.54	6.88052	11.4405	5.00632
	3.33754	6.01684	3.33754	4.86526	4.25455	3.91362	3.33754	6.35449	3.33754	3.33754	6.88052	4.08764	3.73149	3.33754	10.62	3.33754	6.67509	10.9429	4.25455
	3.33754	5.40744	2.8904	4.25455	4.08764	3.91362	2.36	5.9	3.33754	3.33754	6.77858	4.25455	3.54	3.33754	10.62	3.33754	7.27401		5.00632
	2.63856	5.9	2.63856	4.08764	3.33754	3.54	2.63856	6.01684	3.33754	3.33754	6.77858	4.08764	4.08764	3.33754	10.5542	3.33754	7.17766		4.08764
	2.8904	5.9	2.63856	3.73149	3.54	3.73149	2.36	6.35449	3.33754	2.8904	7.08	3.54	3.91362	4.08764	10.5542	2.63856	7.55569		5.00632
	3.33754	5.7808	3.33754	3.33754	4.08764	3.91362	3.33754	6.77858	3.33754	2.63856	7.08	3.73149	3.73149	4.25455	10.6854	3.33754	7.55569		4.08764
	2.8904	6.13146	3.33754	3.33754	4.25455	3.91362	2.36	6.01684	3.33754	2.8904	6.98097	3.54	4.08764	4.25455	10.6854	3.54	7.46298		5.00632
	2.63856	5.40744	3.33754	2.63856	3.33754	4.25455	2.63856	6.35449	3.33754	2.8904	6.98097	4.08764	3.73149	4.25455	10.9429	3.33754	7.91568		4.25455
	3.33754	6.01684	2.63856	2.63856	3.33754	4.25455	2.36	6.77858	3.33754	3.33754	6.98097	3.91362	3.33754	4.25455	11.5616	3.54	7.91568		4.86526
	2.8904	6.35449	2.8904		3.54	3.54	3.33754	6.88052	2.8904	3.33754	6.88052	3.54	3.91362	3.91362	11.6217	3.33754	7.46298		4.08764
	2.36	6.77858	3.33754		3.54	3.73149	2.36	6.13146	3.33754	2.8904	6.67509	4.08764	4.08764	3.73149	11.5616	3.33754	7.91568		5.00632
	2.63856	6.35449	2.63856		4.08764	3.91362	3.33754	6.77858	3.33754	3.33754	6.67509	3.73149	4.08764	3.73149	11.6814	3.33754	7.73778		4.08764
	3.33754	6.67509	2.63856		3.54	3.91362	2.36	6.88052	2.8904	3.33754	6.67509	3.54	3.54	3.54	10.8791	3.54	7.55569		4.86526
	1.66877	6.35449	3.33754		3.73149	4.25455	3.33754	6.35449	3.33754	3.33754	6.67509	4.08764	4.08764	3.54	11.1321	3.33754	6.88052		4.08764
	2.04382	6.67509	3.33754		3.54	3.73149	2.36	6.88052	3.33754	3.54	6.88052	3.54	4.08764	3.91362	10.5542	2.8904	7.64727		5.00632
	2.63856	6.13146	2.63856		3.54	3.91362	2.63856	7.17766	3.33754	3.33754	6.77858	3.54	4.25455	4.25455	11.1321	3.33754	7.46298		4.08764
	3.33754	6.46313	2.63856		3.73149	3.33754	2.63856	6.35449	3.54	3.33754	6.98097	3.73149	3.91362	4.25455	11.4405	3.33754	7.55569		5.00632
	2.63856	6.98097	2.8904		4.25455	3.33754	3.33754	6.88052	3.33754	2.8904	6.88052	3.73149	4.25455	4.25455	11.2565	3.33754	7.55569		4.25455
	2.63856	6.46313	3.33754		4.25455	4.25455	2.63856	6.35449	3.33754	3.33754	7.08	4.08764	4.25455	4.25455	11.6217	2.8904	7.91568		5.00632
	2.8904	6.98097	3.33754		3.33754	4.25455	2.63856	6.88052	3.54	2.8904	7.08	4.25455	3.54	4.08764	11.4405	3.33754	7.64727		4.41516
	3.33754	6.35449	2.63856		4.08764	4.25455	2.63856	6.88052	3.33754	3.33754	7.08	3.33754	4.25455	3.54	11.6217	3.33754	7.55569		5.1435
	3.33754	6.77858	3.33754		4.25455	4.08764	3.33754	6.46313	3.54	2.8904	7.27401	3.73149	4.25455	4.08764	11.1321	3.33754	7.55569		4.41516
	2.63856	6.35449	3.33754		4.25455	3.54	2.63856	6.98097	3.33754	3.33754	7.55569	3.33754	3.54	4.25455	10.5542	3.33754	7.55569		5.27712
	2.63856	6.77858	3.33754		2.8904	3.33754	2.63856	6.88052	3.33754	3.33754	7.55569	4.25455	3.33754	4.25455	10.0819	2.8904	7.55569		4.25455
	2.63856	6.35449	2.63856		4.25455	3.33754	2.8904	6.35449	3.33754	2.8904	7.55569	3.33754	3.91362	4.25455	9.58637	3.33754	7.55569		5.00632
	2.63856	6.77858	2.8904		4.25455	3.33754	3.33754	6.88052	3.33754	3.33754	7.55569	3.54	3.54	4.25455		2.8904	7.55569		4.25455
	2.8904	6.98097	3.33754		4.25455	3.33754	3.33754	6.88052	3.33754	2.63856	7.91568	4.08764	3.91362	3.91362		2.8904	7.46298		5.27712
	2.63856	7.46298	2.63856		4.25455	3.33754	2.63856	6.46313	3.33754	3.54	7.73778	3.73149	3.33754	3.73149		3.33754	6.88052		4.08764
	2.63856	6.77858	2.63856		4.25455	3.33754	2.63856	7.08	3.33754	3.33754	7.91568	4.25455	4.25455	3.73149		2.8904	6.88052		4.86526
	3.33754	7.46298	3.33754		3.54	2.8904	3.33754	6.35449	3.33754	3.54	8.17528	4.08764	3.91362	3.73149		2.63856	6.88052		4.08764
	2.63856	7.64727	2.36		3.54	3.33754	2.63856	6.98097	3.33754	3.33754	8.17528	4.25455	3.54	3.54		3.33754	6.98097		4.86526
	2.63856	7.55569	2.63856		3.91362	3.33754	2.63856	6.35449	3.33754	3.33754	8.17528	3.73149	4.08764	3.33754		2.8904	6.98097		4.25455
	2.63856	7.27401	2.63856		4.25455	3.33754	2.63856	6.98097	3.33754	3.33754	7.91568	3.73149	3.73149	3.33754		2.8904	7.55569		4.25455
	3.33754	7.55569	2.8904		4.25455	3.33754	3.33754	7.27401	3.33754	2.63856	7.55569	4.25455	3.54	3.33754		3.33754	7.27401		4.08764
	3.33754	7.55569	3.33754		4.25455	3.33754	2.63856	7.08	2.8904	3.33754	7.91568	4.08764	3.54	3.33754		2.8904	6.88052		4.86526
	3.33754	7.46298	2.8904		4.25455	3.33754	2.63856	7.17766	3.33754	2.8904	7.91568	3.73149	4.08764	2.36		2.63856	7.46298		3.54
	2.63856	7.82723	2.63856		4.25455	3.33754	2.63856	6.88052	3.33754	2.8904	7.91568	4.25455	3.54	1.18		2.8904	7.91568		4.25455
	2.63856	7.46298	3.33754		3.33754	3.33754	2.63856	7.08	3.54	3.33754	8.34386	3.91362	4.08764	1.18		2.8904	7.27401		4.08764
	2.63856	7.82723	3.33754		3.54	3.54	2.63856	7.17766	3.33754	2.8904	8.34386	3.73149	3.54	1.18		2.63856	7.55569		3.91362
	3.33754	8.00315	3.33754		3.73149	3.33754	2.63856	7.46298	3.54	2.8904	8.17528	3.33754	3.54	1.66877		2.8904	7.82723		4.08764
	2.63856	7.55569	2.63856		4.25455	3.33754	2.63856	7.27401	3.33754	2.63856	8.17528	4.08764	4.08764	2.36		2.63856	7.55569		4.41516
	2.63856	8.00315	3.33754		4.25455	3.33754	2.63856	6.88052	3.54	2.63856	8.17528	3.73149	4.08764	2.36		2.63856	7.55569		3.33754
	2.63856	7.55569	3.33754		3.33754	3.33754	2.63856	7.08	3.33754	2.63856	8.17528	4.25455	3.54	2.63856		2.63856	7.55569		3.91362
	2.8904	8.00315	3.33754		3.54	3.33754	2.63856	7.27401	3.33754	2.63856	8.34386	4.25455	3.54	3.33754		2.63856	8.34386		3.33754
	2.63856	8.34386	3.33754		3.91362	3.33754	2.36	7.27401	2.8904	2.63856	8.67119	3.54	3.91362	3.33754		2.63856	7.55569		4.41516
	2.63856	7.82723	3.33754		4.25455	3.33754	2.63856	7.27401	3.33754	2.8904	8.34386	4.25455	3.54	3.33754		2.63856	8.34386		3.73149
	3.33754	8.34386	2.63856		3.33754	3.33754	2.36	6.88052	3.33754	2.63856	8.34386	3.54	3.91362	3.33754		2.63856	8.26		3.54
	2.8904	8.34386	2.8904		3.91362	3.33754	2.63856	7.27401	3.33754	2.63856	8.34386	4.25455	4.25455	3.33754		2.8904	8.5091		4.25455
	2.36	8.00315	3.33754		4.25455	3.73149	2.36	7.55569	2.36	2.63856	8.26	3.33754	3.73149	3.33754		2.8904	8.26		4.08764
	3.33754	8.42689	3.33754		4.25455	3.33754	2.63856	6.98097	3.33754	2.8904	8.34386	4.25455	3.54	3.33754		2.63856	8.9088		4.08764
	3.33754	7.82723	3.33754		3.33754	3.54	2.36	7.46298	3.33754	2.63856	8.34386	3.54	3.73149	3.33754		2.04382	8.34386		3.73149
	2.63856	8.5091	3.33754		3.73149	3.33754	2.63856	7.08	3.33754	2.36	7.64727	4.25455	3.54	3.33754			8.9088		4.08764
	2.8904	8.42689	2.63856		4.25455	2.8904	2.63856	6.88052	2.8904	2.04382	7.55569	3.73149	3.91362	3.33754			8.34386		3.33754
	2.63856	8.26	2.63856		4.25455	3.54	2.8904	6.77858	2.8904		8.42689	3.91362	3.54	3.33754			8.83031		3.33754
	2.8904	8.26	2.8904		4.25455	3.33754	2.8904	7.08	2.63856		8.34386	3.33754	3.91362	3.33754			8.34386		3.54
	2.63856	7.82723	3.33754		4.25455	2.8904	2.8904	7.91568	2.8904		8.34386	4.25455	3.54	3.33754			8.83031		3.54
	2.63856	8.26	3.33754		3.33754	3.73149	3.33754	7.08	2.8904		8.34386	3.73149	3.33754	3.33754			8.34386		3.54
	2.8904	8.42689	2.63856		3.33754	3.33754	2.63856	7.73778	2.63856		8.34386	4.25455	3.54	3.33754			8.59053		4.08764
	2.8904	7.82723	2.63856		3.54	3.33754	3.33754	7.55569	2.63856		8.34386	4.25455	3.33754	3.54			8.83031		3.33754
	2.36	8.26	2.63856		4.08764	3.54	2.36	8.00315	3.33754		8.26	4.25455	3.33754	3.33754			8.26		3.33754
	2.63856	8.5091	3.33754		3.91362	3.54	3.33754	7.55569	2.8904		8.34386	4.25455	3.54	3.33754			8.83031		3.33754
	2.8904	8.26	3.33754		3.33754	3.33754	2.36	7.91568	3.33754		8.34386	4.41516	3.33754	3.33754			8.83031		3.54
	3.33754	8.26	3.33754		3.33754	2.63856	3.33754	7.82723	2.63856		8.34386	4.25455	4.08764	3.33754			9.06375		3.54
	2.63856	8.42689	2.63856		3.54	3.33754	1.66877	8.17528	3.33754		8.34386	4.25455	4.08764	3.33754			8.98661		4.08764
	2.63856	7.91568	2.8904		4.08764	2.8904	3.33754	7.27401	2.63856		8.67119	4.25455	4.08764	3.33754			8.98661		3.33754
	2.63856	8.26	3.33754		3.33754	3.33754	2.04382	7.82723	3.33754		8.67119	4.25455	3.54	3.54			8.34386		4.08764
	3.33754	7.55569	3.33754		4.25455	3.33754	2.36	8.00315	2.8904		8.34386	4.41516	3.33754	3.73149			8.59053		3.54
	2.63856	7.91568	2.63856		4.25455	3.33754	1.66877	8.26	3.33754		8.59053	4.25455	3.33754	4.25455			8.34386		3.33754
	2.63856	8.26	2.8904		3.33754	3.54	2.36	7.46298	2.63856		8.67119	4.25455	3.54	4.25455			8.42689		3.33754
	3.33754	7.55569	3.33754		4.25455	2.8904	1.66877	7.82723	3.54		8.83031	4.25455	3.33754	3.91362			8.67119		4.08764
	2.63856	8.00315	3.33754		4.25455	3.73149	2.36	8.00315	2.63856		8.83031	4.25455	3.33754	4.25455			8.83031		3.33754
	2.63856	7.46298	2.36		4.41516	3.33754	2.04382	8.26	3.54		9.06375	4.86526	3.33754	4.25455			8.83031		4.25455
	2.63856	7.64727	2.63856		3.91362	3.33754	2.36	8.17528	2.63856		9.06375	4.41516	3.33754	3.73149			8.67119		3.33754
	3.33754	7.91568	2.63856		3.33754	3.91362	1.66877	7.91568	3.33754		8.9088	4.25455	3.33754	4.08764			8.34386		4.08764
	2.63856	7.27401	2.63856		4.25455	3.54	2.63856	8.5091	2.04382		9.51346	4.25455	3.33754	4.25455			8.59053		3.33754
	2.63856	7.55569	2.63856		4.25455	3.91362	2.36	8.67119	3.54		9.51346	4.25455	3.33754	3.73149			8.67119		3.54
	2.63856	6.88052	2.63856		4.25455	3.54	2.63856	8.42689	2.04382		9.51346	4.41516	3.33754	4.25455			8.34386		3.33754
	2.63856	7.27401	2.04382		4.25455	3.73149	2.63856	8.9088	3.54		9.58637	3.91362	3.33754	4.25455			8.34386		3.33754
	2.63856	7.55569	1.66877		3.54	3.54	2.63856	8.42689	2.63856		9.29133	4.25455	3.54	4.25455			8.34386		2.8904
	2.63856	7.27401	2.63856		3.54	3.73149	2.04382	8.9088	3.33754		8.98661	4.72	3.33754	3.91362			7.64727		3.33754
	2.63856	7.08	2.63856		3.91362	3.54	2.63856	9.06375	2.04382		9.51346	4.72	3.54	4.25455			8.34386		3.33754
	2.63856	6.98097	2.63856		4.25455	2.8904	2.63856	9.06375	3.33754		9.51346	4.25455	3.33754	4.25455			8.00315		3.54
	2.63856	7.27401	2.63856		4.25455	3.33754	2.63856	9.29133	3.54		9.58637	4.86526	3.54	4.41516			7.91568		3.33754
	2.63856	6.98097	2.63856		4.25455	3.54	2.04382	9.51346	3.33754		9.21609	3.91362	3.91362	4.08764			7.64727		3.33754
	2.63856	6.67509	2.63856		4.25455	3.54	2.8904	9.21609	2.36		9.58637	4.86526	3.91362	4.25455			8.34386		3.33754
	2.8904	6.67509	2.04382		3.33754	3.54	2.04382	9.06375	3.33754		9.73053	4.41516	4.08764	4.25455			7.55569		3.33754
	2.8904	5.9	2.63856		4.08764	3.54	3.33754	9.21609	3.33754		9.58637	4.41516	3.33754	4.41516			8.34386		3.33754
	2.63856	6.01684	2.63856		4.25455	2.8904	1.66877	9.06375	3.33754		9.73053	4.25455	3.73149	4.72			8.34386		3.33754
	2.63856	6.35449	2.63856		4.25455	3.54	3.33754	8.9088	3.33754		9.58637	4.25455	3.54	3.73149			8.26		3.54
	1.18	5.9	2.8904		3.91362	3.54	2.04382	9.21609	3.33754		9.87259	4.41516	3.54	4.08764			8.5091		3.54
	1.66877	5.9	2.63856		3.33754	3.33754	3.33754	9.06375	3.33754		10.2191	4.25455	4.08764	4.25455			7.91568		3.33754
	2.63856	5.00632	2.63856		3.33754	3.54	1.66877	9.21609	3.33754		10.2191	3.91362	4.08764	3.73149			7.64727		4.08764
	2.63856	5.40744	2.63856		3.54	3.33754	3.33754	9.51346	3.33754		9.80182	4.86526	3.73149	4.25455			8.34386		3.33754
	3.33754	4.86526	2.04382		4.08764	3.54	2.04382	9.21609	3.33754		10.2191	4.41516	3.33754	3.73149			8.5091		4.08764
	2.36	5.00632	1.66877		4.25455	2.63856	3.33754	9.06375	2.8904		10.2191	4.86526	3.91362	4.25455			8.5091		3.33754
	2.36	4.86526	1.66877		4.25455	3.33754	2.8904	9.29133	2.63856		10.1507	4.25455	3.91362	3.73149			8.59053		3.33754
	2.63856	4.86526	2.63856		3.91362	3.33754	2.36	9.21609	3.33754		10.3545	4.25455	3.54	4.25455			8.9088		2.8904
	2.63856	4.41516	2.8904		3.73149	3.54	2.63856	8.9088	3.33754		10.2191	3.91362	3.91362	4.25455			8.59053		3.33754
	2.63856		2.63856		3.54	3.33754	2.63856	9.06375	3.33754		10.62	4.25455	3.91362	3.33754			9.06375		2.63856
	2.63856		3.33754		4.25455	3.73149	2.63856	8.5091	3.54		10.1507	4.25455	3.54	4.25455			8.9088		3.33754
	2.8904		3.33754		4.25455	3.33754	2.63856	8.67119	3.33754		9.51346	4.25455	3.91362	4.08764			9.21609		2.8904
	2.63856		3.33754		4.25455	2.63856	2.63856	8.98661	3.33754		9.65872	4.25455	3.54	4.08764			9.21609		3.33754
	2.63856		2.63856		3.33754	3.33754	2.63856	8.83031	3.33754		9.73053	3.91362	3.33754	3.33754			9.21609		2.63856
	2.63856		2.63856		4.25455	2.63856	3.33754	8.59053	3.33754		10.3545	3.73149	3.33754	3.91362			9.21609		3.33754
	3.33754		2.63856		4.25455	3.33754	3.33754	8.98661	3.33754		10.62	4.25455	3.33754	3.33754			9.21609		2.63856
	2.63856		2.63856		4.25455	2.63856	3.33754	8.67119	2.8904		10.3545	4.25455	3.33754	3.73149			9.21609		3.33754
	2.63856		2.63856		4.25455	3.33754	3.33754	8.34386	3.33754		10.3545	4.25455	3.54	3.54			9.21609		2.8904
	2.63856		2.63856		4.25455	2.63856	3.33754	8.83031	2.8904		10.3545	4.25455	3.54	4.08764			9.21609		3.33754
	2.63856		2.63856		4.25455	3.33754	3.33754	8.26	2.63856		10.1507	3.91362	3.33754	4.08764			9.21609		2.63856
	2.63856		2.63856		4.25455	3.33754	3.33754	7.91568	2.63856		10.3545	3.73149	3.91362	4.08764			9.29133		3.33754
	2.8904		2.63856		4.25455	3.33754	3.33754	8.34386	2.36		10.2191	3.73149	4.08764	3.54			9.29133		2.63856
	2.63856		2.63856		3.91362	3.91362	3.33754	8.59053	2.63856		9.87259	3.91362	3.73149	4.08764			9.29133		3.33754
	2.63856		2.63856		3.33754	3.54	3.33754	8.34386	2.36		9.73053	3.73149	3.33754	3.54			9.21609		2.04382
	2.63856		2.63856		3.91362	3.73149	2.63856	8.00315	2.36		9.51346	4.08764	3.73149	4.08764			9.06375		3.33754
	2.63856		2.63856		4.25455	3.73149	2.63856	8.26	1.66877		9.21609	4.25455	3.33754	4.08764			8.83031		2.04382
	2.8904		3.33754		4.25455	3.73149	2.8904	7.91568	2.63856		9.51346	4.08764	3.91362	3.73149			9.06375		3.33754
	2.63856		2.63856		4.25455	3.73149	3.33754	7.55569	2.8904		9.51346	4.25455	3.33754	4.08764			8.26		2.04382
	2.63856		2.63856		4.25455	4.25455	3.33754	7.27401	3.33754		9.06375	3.73149	3.33754	3.54			8.00315		3.33754
	2.63856		2.63856		3.33754	4.25455	3.33754	6.98097	2.8904		8.5091	4.25455	3.73149	4.08764			8.26		2.04382
	2.8904		2.63856		3.33754	4.25455	3.33754	6.35449	2.63856		8.00315	3.54	3.33754	3.54			7.91568		3.33754
	2.63856		2.63856		3.33754	3.73149	3.33754	6.77858	3.33754		8.5091	4.41516	3.73149	4.08764			8.00315		2.04382
	3.33754		2.63856		3.33754	4.25455	3.33754	6.46313	2.8904		7.91568	4.08764	3.54	4.08764			8.26		2.8904
	2.63856		2.63856		3.33754	3.91362	3.33754	5.7808	3.33754		8.26	4.72	3.33754	3.33754			7.64727		2.8904
	2.63856		2.63856		4.25455	3.33754	3.33754	5.9	3.33754		7.64727	3.73149	3.33754	3.54			8.34386		2.36
	2.63856		1.66877		4.25455	3.33754	3.33754	4.72	3.33754		7.46298	4.72	3.33754	3.33754			8.00315		2.36
	2.63856		1.18		4.25455	3.73149	3.33754	4.72	3.33754		6.88052	4.08764	3.91362	3.54			7.91568		2.63856
	2.63856		2.63856		4.25455	3.33754	3.33754	4.72	3.33754		6.67509	4.41516	3.33754	3.54			7.27401		2.36
	2.04382		2.63856		3.33754	3.73149	3.33754	4.72	2.63856		6.88052	4.41516	3.33754	3.91362			6.98097		2.36
	1.66877		2.63856		3.33754	4.08764	3.33754	4.72	2.63856		6.77858	4.25455	3.73149	3.54			6.88052		2.36
	1.66877		2.63856		3.33754	4.08764	2.8904		2.63856		6.01684	4.08764	3.33754	3.54			6.35449		2.36
	2.04382		2.63856		3.33754	3.54	3.33754		2.63856		6.35449	4.25455	3.54	3.91362			7.08		2.36
	2.63856		2.36		3.33754	3.54	3.33754		2.04382		5.40744	4.41516	3.33754	3.54			6.67509		2.36
	2.04382		2.04382		4.08764	4.08764	2.36		2.04382		5.27712	3.91362	3.33754	3.91362			6.67509		2.36
	1.66877		1.66877		3.33754	4.08764	2.36		2.63856		4.86526	3.91362	2.8904	4.08764			6.77858		2.36
	2.04382		2.8904		3.33754	3.33754	2.36		2.63856		4.25455	4.25455	3.33754	3.54			6.67509		2.63856
	1.66877		3.33754		3.33754	3.54	2.36		2.8904		4.25455	4.41516	2.8904	3.54			6.46313		2.63856
	2.63856		3.33754		3.33754	4.08764	2.36		2.63856		4.08764	4.41516	3.33754	3.54			6.35449		2.63856
	2.04382		2.63856		4.08764	3.33754	2.36		2.63856		3.91362	3.91362	3.54	4.08764			6.01684		2.63856
	1.66877		2.04382		4.25455	3.73149	2.63856		2.63856		3.54	3.73149	3.73149	3.91362			5.9
	2.04382		1.66877		4.25455	3.91362	2.63856		2.63856			4.25455	3.73149	4.08764			5.1435
	2.63856		2.63856		3.33754	3.33754	2.63856		2.63856			4.25455	3.91362	4.08764			5.27712
	2.04382		2.63856		4.25455	3.54	2.63856		2.63856			4.86526	3.54	4.08764			5.00632
	1.66877		2.63856		4.25455	3.33754	2.63856		2.63856			4.41516	3.91362	4.08764			5.00632
	1.18		2.63856		4.41516	3.33754	2.63856		2.63856			4.86526	3.33754	4.08764			5.00632
	1.66877		2.63856		3.33754	3.33754	3.33754		2.04382			4.25455	3.91362	3.91362
	2.04382		2.63856		3.91362	3.33754	3.33754		2.63856			4.41516	3.54	3.33754
			2.63856		4.25455	3.33754	3.33754		2.63856			3.73149	3.91362	3.33754
			2.04382		4.25455	2.8904	3.33754		2.63856			4.86526	3.54	3.91362
			2.04382		4.25455	3.33754			2.63856			4.86526	4.08764	4.08764
			1.66877		3.73149	2.8904			2.36			4.86526	3.33754	3.54
			1.66877		3.33754	2.8904			2.8904			4.72	4.25455	3.54
			2.63856		3.33754	2.63856			2.04382			4.72	3.73149	4.08764
			2.63856		3.54	2.8904			1.66877			4.72	4.08764	4.08764
			2.63856		3.91362	2.63856			2.04382			4.25455	4.08764	3.33754
			2.63856		3.54	2.8904			2.04382			4.86526	3.54	3.54
			2.63856		4.08764	3.33754			1.66877			4.08764	3.54	3.91362
			2.63856		4.25455	2.8904			1.66877			4.86526	4.08764	4.08764
			2.04382		4.25455				2.04382			4.08764	3.91362	3.54
			1.66877		3.54				2.63856			4.72	3.54	3.91362
			1.18		4.08764				2.63856			3.54	3.54	4.08764
			1.18		4.25455				2.04382			4.41516	4.08764	4.08764
			2.63856		4.25455				2.63856			3.33754	3.54	3.33754
			2.63856		3.33754							4.25455	3.54	2.63856
					3.33754							4.08764	3.54	3.33754
					3.33754							4.25455	3.54	3.33754
					3.54							4.08764	3.91362	3.54
					4.08764							4.25455	3.54	3.54
					4.25455							3.54	3.73149	3.54
					4.25455							4.41516	3.33754	3.54
					4.25455							3.33754	3.54	4.25455
					4.25455							4.72	4.08764	4.25455
					2.8904							3.54	3.54	4.08764
					3.33754							4.41516	3.91362	3.54
					3.33754							3.33754	3.33754	4.08764
					3.33754							4.25455	3.73149	4.08764
					3.33754							3.33754	3.54	3.54
					3.54							4.41516	3.33754	4.08764
					3.33754							3.33754	2.63856	4.08764
					3.33754							4.41516	2.8904	4.08764
					3.33754							3.33754	2.63856	3.91362
					2.8904							3.54	2.8904	4.25455
					2.63856							3.33754	2.8904	4.41516
					2.63856							3.91362	3.33754	4.25455
					3.33754							3.33754		4.41516
					3.33754							4.41516		4.41516
					3.33754							3.33754		4.41516
					3.54							3.73149		4.08764
					3.33754							3.33754		4.08764
					2.8904							4.08764		3.91362
					3.33754							3.33754		4.25455
					3.33754							4.41516		4.25455
					2.36							3.33754		4.41516
					2.36							4.25455		4.41516
					2.63856							2.63856		4.25455
					2.8904							4.25455		4.41516
					3.33754							2.63856		4.41516
					3.33754							4.72		4.25455
					3.33754							2.63856		4.41516
					3.33754							4.41516		4.41516
					3.33754							2.63856		4.08764
					2.8904							3.73149		4.08764
					2.8904							2.63856		3.54
					2.04382							3.91362		3.91362
					2.36							2.63856		4.08764
					2.63856							4.08764		4.08764
					2.8904							2.63856		3.54
					3.54							3.33754		3.54
					3.54							2.63856		3.54
					3.33754							3.33754		3.91362
					2.8904							2.63856		4.08764
					2.8904							3.54		3.91362
					2.8904							2.63856		4.08764
					2.63856							3.54		3.54
					2.36							2.63856		3.54
					3.33754							3.33754		4.08764
					3.33754							2.8904		3.54
					4.08764							3.73149		3.54
					4.25455							4.08764		3.91362
					3.91362							3.33754		4.08764
					4.41516							3.54		3.33754
												3.33754		3.91362
												3.33754		3.54
												3.91362		3.54
												3.54		3.54
												3.73149		3.54
												3.91362		3.33754
												4.25455		2.63856
												4.08764		3.33754
												3.54		3.33754
												3.33754		3.33754
												3.54		2.63856
												4.08764		3.33754
												4.08764		3.33754
												3.33754		3.33754
												4.08764		2.8904
												4.08764		2.63856
												4.25455		2.8904
												4.41516		2.63856
												4.25455		2.8904
												3.91362		2.8904
												3.91362		2.63856
												4.25455		2.63856
												4.25455		2.63856
												4.25455		2.04382
												4.25455		2.04382
												4.25455		1.66877
												4.25455		2.04382
												4.08764
												3.33754
												2.63856
												2.63856
												2.63856
												2.63856
												2.63856
												2.8904
												2.63856
												2.63856
												2.63856
												2.63856
												2.04382
												2.04382
												2.04382

## Sheet: ctrl_72set3_th
diam_102	diam_51	diam_204	diam_153	diam_255	diam_218	diam_145	diam_72	diam_36	diam_109	diam_254	diam_182	diam_95	diam_159	diam_127	diam_31	diam_191	diam_63	diam_223	diam_255.1
1.83848	1.3	8.32406	1.3	2.6	1.3	1.83848	5.36004	10.7201	11.3331	3.9	9.46414	9.81478	4.11096	10.4	1.83848	7.46793	1.3	5.81378	1.3
1.83848	1.83848	8.72067	1.3	1.3	1.3	1.83848	5.81378	10.4809	12.0557	3.67696	9.72831	9.81478	4.11096	10.4	1.83848	7.8	1.3	6.36867	1.3
1.83848	1.83848	8.72067	1.3	1.3	1.3	1.83848	5.51543	10.1533	11.7	4.11096	10.1533	9.81478	4.31161	10.2362	1.83848	7.58024	1.83848	5.2	1.3
1.83848	2.6	8.42496	1.3	1.3	1.3	1.83848	5.51543	10.1533	12.1951	3.9	9.98549	9.98549	4.31161	10.7986	1.83848	7.8	1.3	5.36004	1.3
1.3	2.90689	9.1	1.3	1.3	1.3	2.25167	5.51543	10.7986	12.1951	3.9	10.4809	9.81478	3.9	10.4809	1.83848	7.8	1.83848	6.5	1.3
1.83848	3.67696	8.62322	1.3	1.83848	1.3	2.90689	5.51543	10.4809	12.5367	4.68722	10.1533	10.1533	3.9	10.4809	1.83848	7.58024	1.83848	6.62873	1.3
1.3	3.9	9.46414	1.3	1.83848	1.3	2.6	5.51543	10.1533	12.5367	4.68722	10.2362	9.98549	4.31161	10.2362	1.83848	7.00071	1.83848	7.12039	1.83848
1.3	3.9	9.1	1.3	1.3	1.3	2.6	5.66657	11.0309	12.3329	4.31161	9.98549	9.81478	4.11096	9.98549	1.83848	7.8	1.83848	7.46793	1.3
1.83848	4.31161	9.1	1.83848	1.3	1.83848	2.90689	5.36004	10.4809	12.7373	5.36004	10.1533	9.98549	4.31161	9.90051	2.25167	7.46793	1.83848	7.8	1.3
1.3	2.90689	9.1	1.3	1.83848	1.83848	2.25167	6.62873	10.2362	11.7	7.00071	9.72831	9.98549	4.68722	11.0309	2.25167	7.12039	1.83848	7.8	1.83848
1.83848	4.50333	9.1	1.83848	1.83848	1.3	2.90689	6.5	10.8766	12.2642	6.5	10.1533	9.98549	4.31161	10.7986	2.90689	7.90759	1.83848	7.8	1.83848
1.83848	3.67696	9.19239	1.83848	1.83848	1.83848	2.6	6.62873	10.7986	12.7373	6.36867	10.2362	9.72831	4.68722	10.5612	2.90689	7.46793	1.83848	8.81703	1.83848
1.3	4.86415	9.46414	1.3	1.83848	1.3	2.90689	6.62873	10.4809	12.9348	8.01374	10.2362	9.98549	3.9	11.6276	2.90689	8.01374	2.25167	9.1	1.3
1.3	3.9	9.19239	1.83848	1.83848	1.3	3.18434	6.62873	10.7201	12.8035	7.8	9.98549	9.46414	4.11096	11.4075	2.25167	7.46793	1.83848	9.1	1.83848
1.83848	4.68722	8.72067	1.83848	1.83848	1.83848	2.90689	6.62873	10.8766	12.1951	8.32406	10.1533	9.72831	3.9	11.7	1.83848	7.8	2.25167	9.1	1.83848
1.3	3.9	8.72067	2.25167	1.3	1.83848	2.90689	7.90759	10.7201	12.5367	7.58024	9.98549	9.46414	3.9	11.7	2.90689	7.35391	2.90689	9.1	1.3
1.83848	5.36004	8.22192	2.25167	1.83848	1.83848	2.25167	7.90759	10.1533	12.8035	8.72067	9.72831	9.98549	3.9	11.6276	2.6	6.5	2.6	9.1	1.3
1.83848	3.9	9.28386	2.25167	1.83848	1.83848	2.90689	8.01374	10.5612	12.0557	8.52467	9.98549	10.1533	3.67696	11.7	2.6	7.46793	2.90689	10.4	1.83848
1.3	5.51543	9.1	1.83848	1.83848	1.83848	2.25167	8.32406	9.81478	12.5367	7.6909	10.1533	9.72831	2.6	11.772	2.6	7.00071	2.90689	10.4	2.25167
1.3	4.31161	8.62322	2.6	1.83848	2.25167	2.6	8.32406	9.81478	12.0557	9.28386	10.1533	9.98549	2.90689	11.4075	2.6	7.35391	2.90689	10.4	2.25167
1.83848	5.36004	8.01374	2.25167	1.83848	2.25167	1.83848	8.32406	9.98549	12.1951	9.19239	10.2362	9.72831	3.67696	12.0557	2.90689	7.00071	3.67696	10.4	1.3
1.3	4.50333	7.90759	2.25167	1.83848	1.83848	2.90689	8.42496	10.1533	11.8436	9.37443	9.98549	9.46414	3.9	11.8436	3.18434	7.46793	2.6	10.4	1.83848
1.83848	5.36004	8.81703	2.25167	1.3	2.90689	1.83848	8.32406	9.98549	12.1951	8.72067	10.1533	9.72831	2.6	12.1951	2.90689	7.58024	2.90689	11.7	1.3
1.3	4.31161	8.62322	2.90689	1.3	2.25167	3.18434	8.62322	9.81478	11.8436	9.37443	9.72831	9.1	2.90689	11.8436	3.18434	6.62873	2.90689	11.6276	1.3
1.83848	5.36004	8.22192	2.25167	1.83848	2.6	1.83848	8.81703	9.72831	11.183	9.19239	9.46414	9.46414	3.67696	12.1951	2.90689	7.35391	2.6	11.4813	1.83848
1.3	4.86415	9.1	2.6	1.83848	2.90689	2.90689	9.1	9.55301	11.8436	9.90051	9.98549	9.55301	3.9	11.4075	2.6	7.8	2.90689	11.7	1.83848
1.3	4.86415	8.81703	2.25167	1.83848	2.90689	1.83848	9.19239	9.98549	11.4075	9.46414	9.98549	9.1	3.9	11.4813	2.90689	7.46793	3.18434	11.7	1.83848
1.83848	5.36004	8.62322	2.6	1.83848	2.6	3.18434	9.98549	9.81478	11.183	9.72831	9.81478	9.46414	3.67696	11.772	2.90689	8.32406	2.90689	11.8436	1.3
1.3	4.86415	8.81703	2.6	1.83848	2.90689	1.83848	10.1533	9.72831	11.183	9.72831	9.28386	9.46414	3.67696	11.9147	2.90689	7.8	2.90689	11.4075	1.83848
1.3	5.2	9.1	2.6	1.83848	2.90689	2.90689	10.1533	10.1533	11.4075	10.1533	9.28386	9.1	3.67696	12.2642	2.90689	8.32406	2.90689	12.1951	1.83848
1.3	4.68722	8.81703	2.90689	1.83848	2.6	1.83848	9.90051	9.46414	11.183	10.641	9.19239	9.1	3.67696	11.9147	2.90689	8.32406	2.90689	11.7	2.6
1.83848	5.51543	8.72067	2.25167	1.3	2.90689	2.6	10.4	9.1	10.5612	10.4809	9.19239	9.1	3.18434	12.2642	2.6	8.01374	3.18434	12.2642	1.83848
1.3	4.68722	8.72067	2.6	1.3	2.6	1.83848	10.4809	9.46414	11.4075	10.5612	9.19239	9.19239	2.90689	11.9147	2.90689	8.52467	2.6	11.7	1.83848
1.3	5.66657	8.62322	2.6	1.3	2.6	3.18434	10.5612	9.55301	11.4813	10.7986	9.28386	9.00666	3.67696	11.772	2.90689	8.72067	2.90689	12.2642	1.83848
1.3	4.68722	8.32406	2.6	1.3	2.90689	1.83848	10.7986	10.4809	11.183	10.8766	9.1	8.72067	3.67696	12.604	2.90689	8.32406	3.18434	12.2642	1.83848
1.3	4.68722	9.1	2.90689	1.3	2.6	2.90689	11.0309	9.81478	10.7201	11.7	8.72067	8.22192	2.6	12.2642	2.6	8.32406	2.6	12.2642	1.3
1.3	5.36004	8.81703	2.6	1.83848	2.90689	1.83848	11.0309	9.98549	11.3331	10.641	8.72067	8.72067	3.67696	12.604	2.6	8.72067	2.90689	11.772	1.83848
1.3	4.86415	8.62322	2.6	1.83848	2.90689	3.18434	10.4	9.72831	11.3331	11.6276	9.1	7.90759	3.67696	12.2642	2.90689	9.00666	3.67696	11.772	1.83848
1.83848	4.68722	8.32406	2.6	1.83848	2.90689	1.83848	11.3331	9.98549	11.2583	11.183	9.1	8.81703	3.9	11.9147	2.90689	9.00666	2.90689	11.8436	1.83848
1.83848	4.86415	8.22192	2.90689	1.83848	2.90689	2.90689	11.183	9.98549	11.1072	11.772	9.1	8.22192	2.6	11.7	3.18434	9.19239	3.18434	12.1951	1.83848
1.3	4.86415	9.1	2.90689	1.83848	2.90689	2.25167	11.1072	10.2362	11.2583	11.8436	8.42496	8.62322	2.90689	11.772	3.18434	9.1	3.67696	12.604	1.83848
1.3	4.68722	8.81703	2.90689	1.83848	2.90689	2.90689	11.1072	10.4809	11.183	11.6276	8.42496	8.32406	3.67696	11.4075	2.6	9.55301	2.6	12.2642	2.25167
1.3	4.68722	8.62322	2.90689	1.83848	2.90689	2.90689	11.183	10.4	11.7	12.2642	8.42496	8.22192	3.67696	12.2642	3.18434	9.19239	2.90689	11.7	1.83848
1.3	4.68722	8.22192	2.90689	1.83848	3.18434	3.67696	11.4075	10.7201	11.2583	11.0309	8.72067	8.52467	3.9	12.0557	2.6	9.1	3.18434	12.2642	1.83848
1.3	4.68722	8.01374	2.90689	1.83848	2.90689	2.6	10.7201	10.4809	10.7986	12.2642	8.72067	8.01374	3.9	12.2642	2.25167	9.19239	2.6	11.7	1.83848
1.83848	4.68722	8.62322	2.90689	1.83848	2.90689	3.18434	11.6276	9.81478	11.3331	12.2642	8.72067	8.01374	3.9	11.0309	2.25167	9.55301	2.90689	12.7373	1.83848
1.83848	4.68722	8.32406	1.83848	1.83848	2.90689	3.67696	11.6276	10.7201	11.4813	11.4075	8.81703	7.6909	3.9	11.183	2.25167	9.28386	2.90689	12.5367	1.3
1.3	4.11096	8.72067	2.90689	1.83848	2.6	2.90689	10.7201	10.4809	11.183	11.4813	8.01374	8.22192	3.9	12.2642	2.90689	8.72067	2.6	12.2642	1.83848
1.83848	4.68722	8.62322	2.90689	1.83848	2.90689	3.18434	11.6276	10.1533	10.7986	12.0557	8.32406	8.01374	3.67696	12.2642	3.18434	9.19239	2.90689	12.7373	1.83848
1.3	4.68722	8.62322	2.90689	1.83848	2.6	3.67696	11.6276	10.1533	11.3331	12.0557	8.32406	7.8	3.67696	12.0557	3.18434	9.00666	2.90689	12.5367	1.3
1.83848	4.68722	8.32406	2.90689	1.83848	2.6	2.90689	11.6276	9.98549	11.4813	11.183	8.42496	8.01374	3.67696	11.772	3.67696	8.72067	3.18434	12.8693	1.83848
1.83848	4.68722	8.22192	2.6	1.83848	2.90689	2.90689	11.7	10.4809	11.183	11.7	8.42496	7.8	3.67696	11.772	3.67696	9.00666	2.90689	12.2642	2.6
1.3	4.68722	7.90759	2.90689	1.83848	2.90689	3.67696	11.7	10.1533	10.8766	11.4075	8.42496	7.8	3.67696	11.4075	2.90689	9.00666	2.90689	12.2642	1.83848
1.83848	4.68722	8.32406	2.6	1.83848	2.6	3.67696	11.7	10.1533	10.7201	11.0309	7.46793	8.01374	3.67696	11.4075	2.90689	9.19239	2.90689	12.2642	2.90689
1.83848	4.11096	8.32406	2.6	2.25167	3.18434	3.67696	11.7	9.98549	11.4075	11.2583	7.58024	7.6909	2.90689	11.0309	2.90689	9.55301	2.6	12.2642	1.83848
1.83848	5.36004	8.22192	2.90689	1.83848	2.6	3.67696	11.7	9.98549	11.183	10.5612	8.01374	8.01374	2.6	11.0309	2.90689	9.19239	2.90689	12.2642	2.6
1.83848	4.31161	8.01374	2.6	1.83848	2.6	3.18434	11.7	9.72831	10.7986	11.0309	8.01374	7.90759	2.6	10.7201	2.90689	8.72067	3.18434	11.9147	2.6
2.25167	5.36004	8.32406	2.90689	2.25167	2.90689	3.67696	11.7	9.55301	11.183	10.4809	8.32406	7.6909	2.6	10.5612	2.90689	9.00666	2.90689	12.2642	2.6
1.83848	4.86415	8.22192	2.90689	1.83848	2.90689	2.90689	11.7	9.19239	10.7986	10.2362	8.32406	8.01374	2.6	11.7	2.90689	9.19239	2.90689	11.9147	1.83848
1.3	5.66657	8.22192	2.90689	1.83848	2.90689	2.90689	11.7	9.81478	10.4809	10.8766	7.58024	7.6909	3.67696	11.7	2.90689	9.00666	2.90689	12.2642	2.6
1.83848	4.68722	7.90759	2.90689	2.25167	2.90689	2.90689	11.7	9.72831	11.183	10.7986	7.6909	7.90759	3.67696	11.7	2.90689	9.00666	2.90689	11.9147	2.6
2.25167	5.66657	8.22192	2.90689	1.83848	2.90689	3.18434	11.7	9.46414	10.7986	9.98549	8.22192	7.90759	4.11096	11.4075	3.67696	8.32406	2.90689	11.9147	2.6
1.83848	5.66657	8.01374	2.90689	1.83848	2.90689	2.6	11.7	9.19239	10.2362	10.5612	8.01374	8.01374	3.67696	11.4075	4.11096	8.72067	2.6	11.8436	2.25167
2.25167	5.51543	8.22192	2.6	2.25167	2.90689	3.67696	11.7	9.19239	10.4809	9.90051	7.46793	7.58024	3.67696	11.183	4.11096	8.32406	2.6	12.2642	1.3
1.83848	6.36867	8.01374	3.18434	2.25167	2.6	3.18434	10.4	9.55301	10.2362	10.4809	8.32406	7.6909	3.67696	11.2583	4.11096	8.52467	2.90689	11.8436	2.6
2.6	5.51543	7.90759	2.6	1.83848	2.90689	2.6	10.4	9.1	10.4809	9.72831	8.32406	7.90759	3.67696	10.7986	4.11096	8.72067	2.90689	12.2642	2.6
1.83848	6.5	7.58024	2.6	1.83848	2.6	2.90689	10.4	8.72067	10.1533	10.2362	8.32406	8.01374	3.9	11.8436	3.18434	8.32406	2.6	11.8436	1.83848
2.25167	6.5	8.22192	2.6	2.25167	2.90689	3.67696	10.4	8.42496	10.4809	10.2362	7.6909	7.8	2.90689	11.772	2.6	8.72067	2.6	11.8436	1.3
2.25167	6.5	7.90759	2.6	2.25167	2.90689	3.67696	10.4	9.00666	10.4809	9.37443	8.01374	7.58024	2.90689	11.772	2.6	8.52467	2.90689	12.2642	2.6
2.25167	6.62873	7.35391	2.6	1.83848	2.90689	2.90689	10.4	8.72067	10.1533	1.3	8.01374	7.46793	2.90689	11.7	2.90689	8.32406	2.90689	11.7	2.6
1.83848	6.5	7.90759	2.90689	1.83848	2.6	3.67696	10.4	8.72067	9.81478	1.83848	8.01374	7.8	2.90689	11.7	2.6	8.32406	2.6	12.2642	2.90689
2.6	5.95735	6.755	2.90689	2.25167	2.90689	2.90689	10.4	8.52467	9.98549	1.3	8.01374	7.6909	2.90689	11.7	2.90689	7.46793	2.90689	11.772	2.6
2.6	6.5	7.12039	2.90689	1.83848	2.90689	3.18434	11.6276	8.52467	10.1533	1.3	8.01374	7.46793	3.67696	11.4075	2.90689	8.72067	3.18434	12.0557	2.25167
2.25167	6.36867	7.35391	2.6	1.83848	2.90689	3.67696	11.6276	8.72067	10.2362	1.3	8.01374	6.62873	3.67696	11.183	3.18434	8.01374	2.6	11.7	2.90689
2.6	5.66657	7.58024	2.90689	1.83848	2.6	3.67696	11.6276	8.32406	10.1533	1.3	7.12039	7.00071	3.67696	11.6276	2.6	7.35391	2.90689	11.7	2.90689
2.6	5.36004	6.755	2.90689	2.25167	2.6	3.18434	11.6276	8.72067	9.72831	1.3	7.35391	7.00071	3.67696	11.1072	2.6	8.32406	2.90689	11.6276	2.6
2.25167	5.51543	7.12039	2.6	1.83848	2.6	3.67696	11.4813	8.72067	9.46414	10.7986	8.42496	7.6909	3.67696	10.7986	2.6	7.8	3.18434	11.772	2.6
2.6	4.68722	7.35391	2.6	1.83848	2.90689	3.18434	11.2583	8.01374	9.72831	10.1533	8.42496	7.46793	3.67696	11.183	2.90689	8.32406	2.6	11.4813	2.6
2.6	5.36004	7.35391	2.90689	1.83848	2.6	3.67696	11.183	7.8	9.37443	9.37443	8.32406	7.00071	3.67696	11.0309	2.90689	7.8	2.90689	11.7	2.90689
1.83848	5.66657	5.95735	2.6	1.83848	2.6	3.67696	11.1072	8.52467	8.81703	1.3	8.01374	6.62873	3.67696	11.4075	2.90689	7.46793	3.18434	11.3331	2.90689
2.6	4.86415	7.00071	2.90689	1.83848	2.25167	3.67696	11.1072	7.6909	9.19239	1.83848	8.01374	6.5	3.67696	11.7	2.90689	7.8	3.18434	11.7	2.6
2.90689	5.66657	6.62873	2.90689	2.25167	2.6	3.67696	11.1072	8.72067	9.46414	1.83848	8.32406	7.00071	3.18434	11.772	2.90689	7.46793	2.90689	11.183	2.6
2.25167	4.86415	5.95735	2.6	2.25167	2.90689	3.67696	11.1072	7.6909	9.1	1.3	8.32406	6.36867	3.67696	11.8436	2.6	7.8	2.90689	11.183	2.6
2.6	5.95735	6.755	2.6	1.83848	2.90689	3.67696	11.0309	8.52467	8.72067	1.3	8.32406	6.62873	3.67696	11.0309	2.6	7.58024	2.90689	10.7201	2.6
2.90689	4.86415	6.755	2.6	2.25167	1.83848	3.67696	11.0309	8.52467	9.1	1.3	8.32406	7.12039	3.67696	11.183	2.6	7.8	2.90689	10.4809	2.25167
2.6	5.66657	6.62873	2.6	2.25167	2.90689	3.67696	9.90051	8.52467	8.72067	1.3	8.01374	7.00071	3.67696	11.7	2.90689	7.8	3.18434	10.8766	2.6
2.90689	5.36004	7.12039	3.18434	1.83848	2.90689	4.31161	10.7986	8.42496	8.32406	9.81478	8.01374	6.62873	3.18434	11.7	2.90689	8.01374	3.18434	9.98549	2.6
2.6	5.51543	6.755	2.6	1.83848	2.25167	3.67696	9.90051	7.58024	8.32406	2.6	8.01374	6.36867	3.9	11.7	2.90689	8.32406	3.67696	11.183	2.6
2.6	5.51543	6.5	2.90689	1.83848	2.6	4.31161	9.90051	7.8	8.52467	2.6	8.01374	6.755	4.11096	11.7	2.6	8.72067	3.9	10.7986	2.25167
2.90689	5.51543	6.36867	2.90689	2.25167	2.6	3.67696	9.90051	7.8	7.8	2.25167	7.6909	5.95735	3.9	10.7201	2.6	9.00666	3.9	10.7201	2.6
2.90689	5.81378	6.5	2.6	1.83848	1.83848	3.67696	9.90051	7.58024	8.01374	1.3	7.46793	5.81378	3.9	11.0309	2.6	8.72067	3.9	10.7201	2.90689
2.6	5.66657	6.62873	2.6	1.83848	2.6	3.67696	9.90051	7.12039	8.32406	1.3	7.46793	6.62873	3.67696	11.183	2.6	9.19239	4.31161	10.641	2.6
3.18434	5.51543	6.36867	2.6	2.25167	2.6	3.67696	9.90051	6.62873	7.8	9.46414	7.46793	6.36867	2.90689	11.0309	2.90689	9.28386	4.31161	10.4809	2.6
2.90689	5.95735	5.95735	2.6	2.25167	2.6	3.67696	9.90051	7.46793	8.01374	2.6	7.6909	6.62873	3.9	10.4	3.18434	9.19239	3.9	10.4809	2.90689
2.6	5.51543	6.5	2.90689	1.83848	2.6	3.67696	9.90051	7.00071	7.46793	1.83848	7.46793	6.62873	3.9	10.4809	2.90689	9.19239	3.67696	10.4809	2.6
2.90689	5.81378	6.36867	2.90689	2.25167	1.83848	3.67696	9.90051	7.00071	7.6909	1.83848	7.00071	6.5	3.67696	10.5612	2.90689	8.72067	3.18434	9.98549	2.6
3.18434	6.36867	6.36867	3.18434	2.90689	2.25167	3.67696	9.19239	6.5	8.01374	10.1533	7.58024	6.36867	2.90689	10.641	2.6	9.19239	3.18434	9.72831	2.6
2.6	5.95735	6.5	2.90689	2.6	2.6	3.67696	9.90051	7.00071	7.6909	9.46414	7.35391	5.95735	3.9	9.81478	2.6	8.52467	3.18434	9.98549	2.6
3.18434	5.51543	6.5	3.67696	1.83848	2.90689	4.31161	9.90051	7.00071	7.46793	8.62322	7.35391	5.66657	3.18434	9.98549	2.6	9.00666	3.18434	9.98549	2.90689
2.6	5.51543	6.5	2.90689	2.25167	2.25167	3.67696	9.90051	6.755	7.35391	2.6	7.35391	5.95735	3.18434	10.2362	2.6	8.32406	2.6	9.98549	2.6
2.6	5.51543	6.5	2.90689	1.83848	2.90689	4.68722	9.1	6.755	7.46793	2.6	7.00071	5.95735	2.90689	10.4809	2.90689	8.72067	2.90689	9.46414	2.6
2.90689	5.51543	6.5	2.90689	1.83848	1.83848	3.67696	8.81703	6.62873	7.46793	2.6	7.35391	6.09754	3.18434	9.98549	2.90689	9.19239	3.67696	9.72831	2.6
2.6	5.36004	6.36867	3.67696	2.25167	2.6	4.68722	8.72067	6.755	7.00071	2.25167	7.35391	6.09754	3.18434	9.55301	2.90689	9.19239	3.67696	9.55301	2.6
2.90689	5.36004	6.5	2.90689	2.6	2.90689	3.67696	8.72067	6.755	7.00071	1.83848	7.35391	5.66657	3.67696	9.19239	3.18434	9.55301	3.9	9.1	2.6
2.90689	5.36004	5.95735	2.90689	1.83848	2.25167	4.68722	8.72067	6.755	6.62873	9.98549	7.12039	6.36867	3.18434	9.1	3.18434	9.55301	3.67696	9.19239	2.90689
2.6	4.86415	6.36867	2.90689	2.25167	2.6	3.67696	8.72067	6.36867	7.00071	9.46414	7.00071	6.36867	3.67696	9.98549	2.90689	9.19239	3.67696	9.37443	2.6
2.6	4.68722	5.95735	3.67696	2.6	3.18434	4.68722	8.72067	6.62873	7.00071	2.6	6.62873	6.09754	3.67696	9.81478	2.90689	9.55301	2.6	8.81703	2.6
2.6	4.86415	5.95735	2.6	2.90689	2.6	3.67696	8.42496	6.62873	6.62873	2.6	6.62873	6.36867	2.90689	9.55301	2.6	9.46414	2.90689	8.42496	2.25167
2.90689	4.86415	6.36867	3.9	2.25167	2.6	4.68722	8.32406	6.36867	6.5	2.6	6.62873	5.95735	3.67696	9.28386	2.6	9.19239	2.90689	9.1	2.6
2.90689	4.86415	6.36867	2.90689	2.25167	3.18434	3.18434	8.32406	6.36867	7.00071	2.25167	6.62873	6.36867	2.6	9.19239	2.90689	8.32406	2.6	8.72067	2.6
2.6	4.86415	6.36867	3.18434	1.83848	2.25167	4.68722	9.19239	6.62873	7.00071	1.83848	6.62873	5.95735	2.6	9.98549	2.6	9.28386	2.6	8.52467	2.6
2.6	4.68722	5.51543	2.90689	1.83848	2.6	2.90689	9.19239	6.09754	6.62873	1.83848	6.62873	5.95735	2.6	10.2362	2.6	8.72067	2.90689	8.42496	2.6
2.90689	4.31161	5.81378	3.9	2.25167	3.18434	4.86415	9.19239	6.09754	6.36867	10.1533	6.62873	5.95735	2.6	9.1	2.6	8.72067	2.6	8.72067	2.6
2.90689	4.86415	5.95735	2.90689	2.25167	2.6	3.67696	9.19239	6.5	6.36867	9.46414	6.62873	5.81378	3.18434	9.81478	2.90689	9.1	2.6	8.52467	1.83848
2.90689	4.68722	6.36867	2.90689	2.25167	2.6	4.86415	9.19239	6.62873	6.62873	2.6	6.36867	5.95735	2.6	10.2362	2.90689	8.81703	2.90689	8.01374	2.6
2.6	4.86415	5.2	2.6	2.6	3.18434	2.90689	9.19239	5.95735	6.5	2.6	6.36867	5.95735	2.6	10.1533	2.6	8.72067	3.18434	8.72067	2.25167
3.18434	4.86415	6.36867	3.18434	2.6	2.6	4.68722	9.19239	5.95735	6.5	2.6	6.36867	6.09754	3.18434	10.2362	2.6	9.19239	2.6	8.52467	2.6
2.90689	4.68722	6.36867	2.6	1.83848	2.6	2.90689	9.19239	5.95735	6.36867	2.6	6.36867	6.36867	2.6	9.90051	2.6	9.19239	2.90689	8.32406	2.90689
2.90689	4.68722	5.51543	3.9	2.25167	2.6	4.86415	9.1	5.66657	6.5	2.6	6.62873	5.95735	2.6	9.90051	2.6	9.19239	2.90689	8.52467	2.6
3.18434	4.68722	5.95735	2.6	2.90689	2.25167	2.90689	8.81703	5.95735	6.09754	2.6	6.62873	6.36867	3.18434	9.90051	2.6	9.1	2.6	8.32406	1.83848
3.18434	4.86415	5.66657	2.90689	2.90689	2.6	4.11096	8.72067	5.95735	5.66657	9.46414	7.00071	5.81378	2.6	9.81478	1.83848	8.32406	2.6	8.01374	2.90689
2.6	5.36004	5.81378	2.90689	2.90689	2.90689	2.90689	8.72067	6.62873	5.95735	2.6	6.62873	6.36867	2.6	9.55301	2.90689	8.52467	2.90689	8.01374	2.90689
3.18434	5.36004	5.95735	3.67696	2.6	1.3	4.86415	8.72067	6.36867	6.09754	2.6	6.36867	5.66657	2.90689	10.1533	1.83848	9.00666	2.90689	8.01374	3.18434
3.67696	5.36004	5.81378	2.90689	2.6	2.6	2.6	8.72067	5.66657	6.36867	2.6	6.5	5.95735	3.18434	9.28386	2.25167	9.00666	2.90689	7.58024	2.90689
2.90689	5.36004	5.81378	3.9	2.6	2.6	4.68722	8.42496	6.36867	5.81378	2.6	6.5	5.66657	2.90689	9.19239	2.6	7.58024	2.6	7.8	1.3
3.18434	5.36004	5.36004	3.18434	2.6	2.90689	3.18434	8.81703	6.5	6.09754	10.4809	6.36867	6.36867	2.6	9.19239	1.83848	8.01374	2.90689	8.01374	2.6
2.90689	5.36004	5.2	2.90689	2.90689	1.83848	4.68722	9.1	6.36867	6.36867	9.37443	6.36867	6.36867	2.90689	9.72831	1.83848	8.62322	3.18434	7.46793	2.6
2.90689	5.36004	5.2	2.6	2.90689	2.6	2.90689	9.19239	6.62873	6.09754	9.72831	6.36867	5.81378	2.90689	9.46414	2.90689	8.62322	2.6	7.8	2.90689
3.18434	5.51543	5.2	3.67696	2.90689	2.6	4.68722	8.72067	6.5	5.95735	2.6	6.36867	6.36867	2.90689	9.37443	1.83848	9.1	2.90689	7.46793	2.90689
3.18434	5.36004	5.36004	2.6	2.6	2.90689	3.67696	8.72067	6.755	6.36867	2.6	5.36004	6.755	3.67696	8.72067	1.83848	8.52467	3.18434	7.58024	2.6
3.18434	4.86415	5.51543	3.9	2.25167	2.25167	4.68722	8.72067	6.62873	6.09754	2.6	5.51543	6.09754	2.6	9.46414	2.6	8.32406	2.90689	7.90759	1.3
2.90689	5.36004	5.81378	2.6	2.6	2.25167	3.67696	8.62322	6.36867	5.36004	10.5612	6.36867	6.5	3.18434	9.28386	1.83848	8.52467	3.18434	7.6909	2.90689
2.6	5.36004	5.36004	3.18434	2.6	2.90689	5.51543	8.32406	6.36867	5.66657	9.81478	6.36867	7.00071	2.6	9.19239	1.83848	8.32406	3.67696	8.01374	2.6
3.18434	5.36004	5.81378	2.90689	2.6	2.90689	2.90689	9.1	6.5	5.95735	2.6	6.36867	7.00071	2.90689	9.19239	2.6	8.22192	3.67696	7.58024	1.3
3.67696	4.86415	5.2	3.9	2.6	2.90689	5.51543	9.19239	6.62873	6.09754	2.6	6.09754	7.46793	2.90689	9.19239	1.83848	7.6909	3.18434	7.8	2.6
3.67696	5.36004	5.2	3.18434	2.90689	2.90689	3.67696	9.19239	6.62873	5.66657	2.90689	5.95735	7.46793	2.90689	9.19239	2.25167	8.32406	3.67696	8.01374	2.6
2.90689	4.86415	5.66657	2.90689	2.90689	2.90689	5.66657	8.22192	6.09754	5.95735	2.6	5.36004	7.35391	2.90689	9.28386	2.6	8.32406	3.67696	7.8	2.90689
2.90689	5.2	5.36004	2.90689	2.90689	3.18434	3.67696	8.01374	6.5	5.66657	2.6	5.36004	7.00071	1.3	8.22192	1.83848	8.01374	3.67696	7.58024	2.90689
3.67696	5.36004	5.36004	3.67696	3.18434	2.90689	5.66657	8.72067	6.62873	6.09754	10.1533	5.66657	7.00071	3.18434	8.22192	2.6	7.46793	3.67696	7.8	2.6
3.18434	4.86415	5.51543	2.90689	2.90689	2.90689	3.67696	8.72067	6.62873	6.09754	2.6	5.66657	7.58024	1.3	8.22192	2.90689	7.46793	3.67696	7.6909	1.3
2.6	5.36004	5.66657	3.67696	2.90689	3.18434	5.51543	8.72067	5.95735	5.66657	2.6	5.51543	7.58024	2.6	9.1	2.6	6.755	3.18434	7.46793	2.90689
2.90689	5.51543	4.31161	2.6	2.6	3.9	3.67696	8.72067	5.66657	5.95735	2.6	4.68722	7.12039	1.83848	8.81703	2.90689	7.35391	3.18434	7.46793	2.6
3.18434	5.36004	5.2	3.18434	2.6	2.6	5.51543	8.22192	6.09754	5.66657	2.6	5.36004	8.01374	3.18434	8.72067	2.90689	6.62873	3.67696	7.58024	2.90689
3.18434	5.51543	5.2	2.6	2.90689	2.90689	3.67696	8.22192	6.09754	5.95735	2.6	5.36004	8.01374	1.83848	8.72067	2.6	7.12039	3.67696	7.46793	2.90689
3.18434	5.36004	5.36004	3.9	2.6	2.6	5.51543	8.32406	6.36867	5.95735	10.2362	5.36004	8.32406	2.6	8.62322	2.25167	7.46793	3.18434	7.35391	1.3
3.18434	5.51543	5.36004	3.18434	2.6	2.90689	3.9	8.22192	6.36867	5.66657	9.46414	5.36004	7.58024	1.83848	8.32406	2.6	7.00071	3.67696	7.46793	2.6
3.18434	5.81378	4.86415	3.18434	2.6	3.18434	5.2	8.22192	5.95735	5.95735	2.6	4.86415	8.01374	3.18434	8.72067	2.6	7.00071	3.67696	7.46793	2.6
3.67696	5.36004	5.36004	2.90689	2.6	2.90689	3.67696	8.01374	5.95735	5.66657	2.6	4.68722	7.58024	1.83848	8.72067	2.6	7.00071	2.90689	7.12039	2.90689
2.90689	5.51543	4.68722	3.9	2.6	2.90689	5.36004	8.22192	6.09754	5.66657	2.90689	4.86415	8.32406	2.6	8.72067	2.6	6.755	2.6	7.46793	2.90689
3.18434	5.36004	5.2	3.18434	2.90689	2.90689	3.67696	8.22192	6.09754	5.66657	2.6	4.68722	8.22192	1.3	8.72067	2.6	7.00071	2.90689	7.12039	1.3
3.18434	5.51543	5.2	3.9	2.90689	2.90689	5.51543	8.22192	5.66657	5.66657	9.98549	5.36004	8.01374	3.18434	8.22192	2.6	6.755	3.18434	7.12039	2.90689
3.18434	5.51543	4.86415	2.90689	2.90689	2.90689	3.9	8.01374	5.95735	5.95735	9.81478	4.86415	7.46793	1.83848	8.22192	2.6	7.00071	2.90689	7.12039	2.90689
2.90689	5.95735	4.31161	3.67696	2.90689	2.90689	5.95735	7.90759	6.09754	5.66657	2.6	4.68722	7.58024	2.6	8.22192	2.90689	6.62873	3.18434	7.46793	2.6
3.18434	5.81378	4.11096	2.90689	2.6	2.6	3.67696	7.8	6.09754	5.66657	2.6	4.68722	7.00071	1.3	8.22192	2.90689	7.00071	2.90689	7.12039	2.90689
2.90689	5.51543	5.2	3.67696	2.90689	2.90689	6.36867	7.6909	5.51543	5.36004	2.6	4.68722	7.58024	2.90689	8.22192	2.90689	6.36867	3.18434	7.12039	1.83848
2.90689	5.95735	4.68722	2.90689	3.67696	3.67696	3.67696	7.46793	5.51543	5.81378	2.6	4.68722	7.12039	1.3	8.32406	3.18434	6.09754	2.90689	7.12039	2.6
2.90689	5.95735	5.36004	3.9	3.67696	2.90689	6.5	7.6909	6.09754	5.66657	9.98549	4.68722	7.6909	2.6	8.32406	2.90689	6.36867	2.6	7.46793	2.90689
2.90689	5.36004	4.86415	2.90689	3.9	3.18434	3.67696	7.8	6.09754	5.36004	2.6	4.68722	7.6909	1.83848	8.01374	2.90689	5.95735	2.25167	7.12039	2.6
3.18434	6.36867	4.31161	3.9	3.67696	4.11096	6.36867	7.8	5.81378	5.36004	2.6	4.68722	7.8	2.90689	7.90759	3.18434	6.36867	2.6	7.00071	2.6
2.90689	5.36004	4.31161	2.6	3.9	2.6	3.67696	7.8	5.66657	5.66657	2.6	4.68722	7.46793	1.3	7.8	2.90689	6.36867	2.6	7.12039	1.3
3.67696	5.81378	4.68722	4.11096	2.90689	2.90689	5.51543	7.6909	5.95735	5.51543	10.5612	4.68722	7.00071	2.90689	7.8	2.90689	6.09754	2.6	7.12039	2.90689
3.67696	5.95735	5.2	2.6	3.18434	2.6	3.67696	6.5	5.66657	5.36004	9.81478	4.68722	7.00071	1.83848	7.8	2.6	5.81378	2.6	7.12039	2.6
3.18434	5.51543	4.86415	3.9	3.67696	3.18434	5.36004	6.5	6.09754	5.36004	9.1	4.68722	7.46793	2.6	7.8	1.83848	5.95735	2.6	7.00071	2.6
3.67696	5.95735	4.11096	2.90689	2.6	4.11096	3.67696	6.5	5.95735	5.95735	2.6	4.68722	7.35391	2.25167	7.46793	2.90689	5.81378	2.6	7.12039	2.6
3.18434	6.36867	4.31161	3.9	2.6	2.90689	5.36004	6.5	5.66657	5.66657	2.90689	4.68722	7.00071	2.90689	7.12039	2.6	5.95735	2.6	7.00071	1.3
3.9	6.62873	4.68722	2.90689	2.6	2.6	2.90689	6.36867	5.66657	5.51543	2.6	4.86415	7.00071	1.83848	6.755	2.6	5.81378	2.6	7.35391	2.90689
3.67696	5.95735	4.68722	4.31161	2.6	4.11096	5.36004	6.755	5.95735	5.66657	2.25167	4.86415	6.5	2.6	6.755	2.6	5.95735	2.6	7.46793	2.90689
3.67696	6.36867	5.2	3.18434	2.6	2.90689	3.67696	6.62873	5.95735	5.66657	9.72831	4.86415	7.00071	1.83848	6.755	2.6	5.81378	2.6	7.00071	2.6
3.67696	6.5	4.86415	3.67696	2.6	2.90689	5.36004	6.755	5.66657	5.36004	9.81478	4.86415	7.00071	2.90689	6.62873	2.6	5.95735	2.6	7.35391	1.3
3.18434	6.5	4.31161	2.6	2.6	2.6	3.67696	6.62873	5.51543	5.66657	2.6	4.68722	6.62873	1.83848	6.5	2.90689	5.81378	2.6	6.5	2.6
3.9	5.66657	4.31161	2.90689	2.6	2.90689	5.51543	6.5	5.66657	5.66657	2.6	4.68722	6.755	2.6	6.5	2.90689	5.81378	2.6	6.62873	2.6
3.67696	7.00071	4.86415	2.6	2.6	3.9	2.90689	6.5	5.95735	5.36004	2.6	4.68722	2.6	1.83848	6.62873	2.6	5.36004	2.6	6.5	3.67696
3.67696	6.36867	4.68722	3.67696	2.90689	2.90689	5.51543	6.5	5.81378	5.36004	1.83848	4.86415	2.6	2.90689	6.5	3.18434	5.81378	2.6	6.62873	3.18434
4.11096	6.36867	4.11096	2.6	2.6	2.90689	3.67696	6.5	5.51543	5.36004	9.55301	4.86415	2.6	1.83848	6.5	2.90689	5.36004	2.6	6.36867	1.3
3.67696	6.09754	4.31161	3.9	2.6	2.90689	5.36004	5.95735	5.66657	5.66657	8.81703	5.36004	2.6	2.6	7.46793	2.90689	5.95735	2.6	6.62873	2.90689
3.67696	5.81378	4.11096	2.90689	2.90689	3.9	3.67696	6.36867	5.95735	5.51543	2.6	5.36004	2.6	1.83848	7.12039	2.6	5.36004	2.90689	6.36867	2.90689
3.9	5.95735	4.11096	2.90689	2.6	2.90689	4.86415	6.5	5.81378	4.86415	2.6	4.86415	2.6	2.90689	7.00071	2.6	5.2	2.90689	6.755	2.6
4.31161	5.81378	4.11096	3.18434	2.6	2.90689	3.67696	6.62873	5.51543	4.68722	2.6	4.68722	2.6	1.83848	6.755	2.90689	5.51543	2.6	6.755	2.6
4.31161	5.95735	4.31161	3.18434	2.6	3.18434	5.36004	6.36867	5.36004	5.36004	2.6	4.68722	2.6	2.6	7.35391	2.6	5.2	3.67696	6.62873	2.6
3.67696	5.36004	4.68722	3.67696	2.6	4.11096	3.67696	6.5	5.51543	5.36004	2.6	4.68722	2.6	1.83848	6.62873	2.6	5.51543	2.6	7.00071	1.3
3.18434	5.51543	4.31161	2.90689	2.6	2.90689	4.86415	6.36867	5.95735	4.86415	1.83848	4.86415	2.6	2.6	7.00071	2.6	4.68722	3.67696	6.5	2.90689
4.11096	1.3	4.11096	3.67696	2.6	2.90689	3.67696	6.5	5.66657	5.36004	9.81478	4.68722	2.6	1.83848	7.00071	2.6	4.68722	2.90689	6.62873	2.6
4.31161	5.36004	4.68722	3.18434	2.90689	3.18434	4.68722	7.00071	5.36004	5.36004	9.1	4.68722	2.6	2.90689	6.5	2.90689	5.36004	2.90689	6.36867	2.90689
4.31161	1.83848	4.31161	2.6	2.90689	4.50333	3.67696	6.36867	5.95735	5.36004	2.6	4.68722	2.6	1.83848	6.5	2.90689	4.68722	3.18434	6.5	2.90689
4.11096	5.36004	4.31161	2.90689	2.90689	2.90689	4.68722	6.62873	5.95735	4.86415	2.6	4.68722	2.6	2.6	6.62873	2.6	5.36004	3.9	6.36867	1.3
4.31161	5.36004	4.11096	2.90689	2.6	3.18434	3.9	7.00071	5.66657	5.36004	2.6	4.68722	2.6	2.25167	6.5	2.90689	4.68722	3.18434	6.36867	2.90689
4.31161	4.86415	4.31161	3.18434	2.90689	3.67696	4.68722	6.5	5.36004	5.36004	2.6	4.31161	2.6	2.90689	6.5	2.6	5.36004	3.67696	6.36867	2.6
4.31161	1.83848	4.31161	2.90689	2.90689	2.90689	3.67696	6.36867	5.36004	5.36004	1.3	4.68722	2.6	2.6	6.5	2.90689	4.86415	4.11096	5.81378	2.90689
3.67696	5.36004	4.31161	3.18434	3.9	2.6	4.31161	6.62873	5.66657	5.51543	9.55301	4.68722	2.6	2.90689	6.5	2.90689	5.2	1.3	6.36867	2.90689
4.31161	5.36004	4.11096	3.18434	2.90689	3.67696	3.67696	6.36867	5.66657	5.36004	9.1	4.86415	2.6	2.25167	6.36867	2.90689	5.51543	3.67696	5.81378	1.3
3.67696	1.83848	4.31161	3.18434	2.90689	3.9	4.68722	7.12039	5.36004	5.36004	2.6	4.68722	2.6	2.90689	6.36867	3.18434	5.2	1.3	5.36004	2.6
3.67696	4.86415	4.11096	3.18434	4.31161	2.90689	3.67696	6.62873	5.36004	5.36004	2.6	4.68722	2.6	2.90689	6.5	2.90689	4.68722	3.67696	5.95735	2.90689
4.11096	1.83848	4.31161	3.67696	3.9	2.90689	4.86415	6.62873	4.86415	4.86415	2.25167	4.68722	7.00071	2.90689	6.5	2.6	5.36004	1.83848	5.51543	2.90689
4.31161	4.68722	4.11096	3.67696	3.9	3.67696	3.67696	6.62873	5.36004	4.86415	1.83848	4.68722	6.755	2.6	5.81378	2.6	4.86415	1.3	6.36867	2.90689
4.68722	4.86415	3.9	2.90689	2.90689	4.50333	4.68722	6.755	5.36004	4.86415	1.83848	4.86415	2.6	2.6	6.5	2.90689	5.36004	1.3	5.81378	1.3
4.68722	4.31161	3.9	2.90689	3.18434	2.90689	3.67696	6.62873	4.86415	4.86415	9.72831	5.36004	2.6	2.90689	6.62873	2.90689	5.2	3.67696	5.36004	2.90689
4.11096	1.3	4.31161	3.67696	2.6	2.90689	4.68722	5.81378	4.68722	4.68722	9.55301	5.36004	2.6	2.25167	6.5	2.6	5.51543	1.3	5.81378	2.90689
4.68722	4.31161	4.31161	2.90689	2.6	3.67696	3.67696	5.81378	5.66657	5.36004	8.81703	4.86415	6.5	2.6	6.5	2.6	5.2	1.3	5.95735	2.90689
5.2	4.68722	4.68722	2.6	2.6	4.68722	5.36004	5.95735	5.36004	5.36004	2.6	5.36004	2.6	2.6	6.62873	2.6	5.36004	1.83848	5.95735	3.18434
5.36004	1.83848	4.11096	2.90689	2.6	2.90689	3.18434	6.36867	5.36004	4.86415	2.25167	5.36004	2.6	2.90689	6.62873	2.90689	5.36004	2.90689	6.36867	2.90689
5.66657	4.11096	3.9	2.90689	2.6	2.90689	4.86415	5.81378	5.36004	4.86415	1.83848	5.36004	2.6	2.90689	6.5	2.90689	4.86415	1.83848	6.36867	1.3
5.81378	4.50333	4.50333	3.18434	2.6	3.67696	3.67696	5.81378	5.66657	5.36004	1.3	4.86415	2.6	2.90689	6.5	2.6	5.36004	1.3	6.36867	2.90689
5.66657	1.83848	4.11096	3.18434	1.83848	4.68722	4.68722	5.81378	5.36004	5.36004	9.55301	4.68722	2.6	2.90689	6.5	2.6	5.2	2.90689	6.36867	2.90689
4.86415	4.11096	4.68722	2.6	1.83848	2.90689	3.9	5.95735	5.36004	4.86415	2.6	4.68722	2.90689	2.90689	6.5	2.6	5.36004	1.3	5.66657	2.6
4.68722	4.31161	4.68722	2.90689	1.83848	2.90689	4.86415	6.36867	5.36004	4.86415	2.6	4.68722	2.90689	2.25167	6.5	2.90689	5.36004	1.3	5.81378	2.90689
4.86415	1.83848	4.31161	3.67696	1.3	3.67696	3.67696	5.95735	5.66657	4.68722	2.6	4.11096	2.6	2.90689	6.36867	2.90689	5.2	1.83848	5.36004	2.90689
5.2	3.67696	4.11096	2.90689	1.3	4.50333	4.68722	6.5	5.36004	4.50333	1.83848	3.67696	2.6	2.90689	6.5	2.6	5.36004	2.90689	5.95735	1.3
4.86415	4.11096	4.31161	2.90689	2.90689	2.90689	3.67696	6.5	5.36004	4.86415	9.46414	3.67696	3.18434	2.90689	5.81378	2.6	5.2	1.83848	5.81378	2.90689
4.68722	4.11096	4.68722	2.6	2.90689	3.67696	4.68722	5.81378	5.66657	4.68722	8.62322	4.31161	3.67696	2.25167	6.36867	2.90689	4.68722	1.83848	5.36004	2.90689
4.31161	1.83848	4.31161	2.6	3.67696	3.9	3.67696	5.81378	5.36004	4.31161	2.6	4.31161	3.18434	2.90689	5.95735	2.90689	5.36004	1.3	5.81378	2.90689
4.31161	3.18434	3.9	2.6	2.6	2.90689	4.50333	5.95735	5.36004	4.50333	2.6	3.67696	2.90689	2.90689	5.81378	1.83848	4.31161	2.90689	5.36004	1.3
4.68722	3.9	4.11096	3.18434	2.25167	2.90689	3.67696	6.36867	5.66657	4.50333	2.6	3.9	2.90689	2.6	5.95735	2.90689	5.2	2.25167	5.81378	2.90689
4.68722	4.11096	4.31161	2.90689	1.83848	2.6	4.31161	6.62873	5.36004	4.50333	2.6	4.31161	2.90689	2.6	5.81378	2.6	4.68722	1.83848	5.36004	2.6
4.86415	2.6	4.31161	3.18434	3.18434	3.18434	3.9	6.5	5.36004	4.86415	2.6	4.31161	2.90689	2.6	5.51543	2.6	4.86415	2.6	5.81378	2.6
4.68722	4.11096	4.11096	2.90689	2.90689	3.67696	4.31161	6.36867	5.66657	4.68722	2.25167	3.67696	2.6	2.90689	5.36004	2.90689	4.68722	1.83848	5.36004	1.3
4.68722	1.83848	4.31161	2.90689	3.67696	3.18434	3.67696	5.95735	5.36004	4.68722	9.72831	3.67696	2.6	2.6	5.36004	2.90689	4.86415	2.25167	5.36004	2.90689
5.2	3.9	4.68722	2.6	2.6	3.18434	3.9	5.36004	5.36004	4.86415	9.46414	3.9	2.25167	2.90689	5.36004	2.90689	4.86415	1.3	5.81378	3.18434
4.68722	4.11096	4.31161	2.90689	2.6	4.50333	3.67696	5.51543	4.86415	4.86415	8.62322	3.9	1.83848	2.6	5.36004	2.6	4.86415	2.6	5.36004	2.90689
3.9	4.31161	3.9	2.90689	2.6	3.18434	4.31161	5.95735	5.2	4.86415	2.90689	3.67696	2.6	2.90689	5.2	3.67696	5.2	1.83848	5.95735	2.6
4.86415	1.83848	3.9	2.90689	3.67696	2.90689	4.31161	5.95735	5.36004	4.86415	3.18434	3.67696	2.6	2.6	5.2	2.6	4.86415	1.83848	5.51543	2.6
4.68722	3.9	4.11096	2.90689	2.90689	2.6	3.67696	6.36867	4.86415	3.67696	2.6	3.67696	2.6	2.90689	5.36004	2.90689	5.36004	1.3	5.36004	1.3
4.31161	4.31161	4.31161	2.90689	3.18434	3.67696	3.9	6.5	5.36004	2.90689	9.37443	3.9	2.6	2.6	5.2	2.90689	4.68722	2.6	5.81378	2.90689
3.9	1.83848	4.11096	2.6	2.6	4.68722	4.31161	5.36004	5.36004	3.18434	9.46414	3.67696	2.6	2.6	5.51543	2.6	5.36004	1.83848	5.36004	3.18434
4.86415	3.9	3.9	2.90689	2.6	3.18434	3.67696	6.36867	5.66657	2.6	2.6	3.67696	2.6	2.6	5.51543	2.6	4.86415	1.3	5.36004	2.90689
4.68722	4.11096	3.9	2.90689	2.6	2.6	3.67696	5.95735	5.36004	2.90689	2.90689	3.18434	2.6	2.90689	5.51543	2.90689	4.31161	2.6	5.81378	2.6
4.68722	4.11096	3.9	3.18434	2.90689	3.67696	4.11096	6.36867	5.51543	3.18434	3.67696	3.67696	2.6	3.18434	5.66657	2.90689	5.36004	1.83848	5.95735	1.3
3.67696	2.25167	4.31161	2.6	2.90689	4.68722	3.67696	6.5	5.36004	2.90689	1.83848	3.67696	2.6	2.90689	5.81378	2.90689	4.86415	2.90689	5.66657	2.6
4.86415	3.67696	3.67696	2.90689	3.18434	2.90689	3.9	6.36867	4.86415	3.18434	9.55301	3.67696	2.6	3.18434	5.51543	2.90689	4.68722	1.83848	6.36867	2.90689
4.68722	3.9	3.67696	2.90689	2.6	2.90689	3.9	5.2	5.2	4.68722	2.6	3.18434	7.00071	2.6	5.36004	2.90689	5.36004	1.3	6.36867	2.90689
4.68722	4.31161	4.11096	3.18434	2.6	2.6	4.11096	5.95735	4.68722	3.67696	2.90689	2.90689	3.18434	2.90689	4.86415	2.90689	4.68722	1.83848	6.5	3.18434
2.90689	1.83848	4.31161	2.90689	2.6	3.67696	3.9	6.36867	5.36004	3.67696	3.67696	3.67696	2.90689	2.90689	5.51543	3.18434	5.36004	2.6	6.62873	2.90689
4.68722	3.9	4.11096	2.90689	2.6	4.68722	3.9	6.36867	4.86415	2.90689	3.9	3.18434	2.90689	2.90689	5.36004	2.25167	4.68722	1.83848	6.36867	2.6
4.86415	4.11096	3.9	2.90689	2.90689	2.90689	4.31161	5.2	4.86415	2.6	4.11096	3.67696	2.6	3.18434	5.51543	2.90689	4.86415	1.83848	6.36867	1.3
2.90689	1.83848	4.11096	3.67696	2.6	2.6	3.67696	5.36004	5.36004	2.90689	2.25167	3.67696	2.90689	2.90689	5.51543	3.18434	4.68722	2.6	6.5	2.90689
4.50333	4.11096	4.11096	2.90689	2.90689	3.67696	3.67696	5.36004	5.36004	3.18434	9.46414	3.18434	2.90689	2.6	5.36004	2.90689	4.68722	1.83848	6.5	2.6
4.86415	4.31161	4.11096	3.18434	2.90689	4.68722	4.31161	5.51543	4.68722	3.67696	8.81703	3.18434	2.90689	2.90689	5.36004	2.6	4.68722	1.3	6.5	2.90689
4.31161	1.83848	4.11096	2.6	3.18434	3.67696	3.67696	5.36004	4.11096	3.67696	3.18434	3.9	2.6	2.90689	5.36004	2.6	4.68722	2.6	6.36867	3.18434
3.18434	3.18434	4.11096	3.67696	3.18434	3.18434	3.9	5.51543	4.68722	5.2	3.9	4.11096	2.6	2.6	4.11096	2.90689	4.50333	1.83848	6.5	1.3
4.68722	3.9	3.9	2.90689	2.90689	2.90689	3.67696	5.95735	4.50333	3.67696	4.31161	4.31161	2.6	2.6	5.2	2.90689	4.31161	1.83848	6.5	2.90689
4.68722	4.11096	4.11096	2.90689	2.90689	2.90689	3.67696	5.95735	4.86415	3.67696	3.67696	4.68722	2.90689	2.6	5.2	2.90689	4.86415	2.90689	6.5	2.6
3.18434	4.11096	2.90689	2.6	2.6	3.67696	3.67696	5.81378	5.36004	4.86415	2.90689	2.6	2.6	2.90689	5.2	2.25167	1.3	1.83848	5.95735	2.90689
3.9	1.83848	4.11096	3.67696	2.90689	4.11096	4.50333	5.81378	5.36004	3.67696	2.25167	2.25167	2.6	2.6	4.68722	2.90689	4.68722	1.83848	5.95735	2.90689
4.68722	3.67696	3.67696	2.90689	3.9	3.67696	3.67696	5.95735	5.36004	3.67696	9.19239	2.6	2.6	2.90689	4.86415	2.6	1.3	1.3	5.81378	2.90689
4.68722	3.9	3.9	3.67696	3.18434	3.18434	3.9	6.36867	4.86415	3.67696	8.81703	2.6	6.62873	3.18434	4.31161	3.18434	1.83848	2.6	6.36867	1.83848
3.67696	3.9	3.9	2.6	3.18434	2.90689	3.67696	6.5	5.36004	3.18434	3.9	2.6	2.6	2.90689	3.9	1.83848	1.83848	1.83848	5.95735	2.90689
4.68722	2.25167	2.90689	3.67696	2.90689	3.9	3.67696	5.2	5.36004	3.67696	2.25167	2.6	2.6	2.6	3.9	3.18434	2.25167	1.3	5.81378	2.90689
4.68722	3.18434	3.9	2.90689	3.18434	3.67696	3.67696	5.2	4.86415	4.68722	8.72067	2.6	2.90689	2.90689	4.86415	2.90689	5.36004	3.18434	6.36867	2.90689
4.86415	3.67696	3.9	3.18434	3.18434	2.90689	4.11096	5.2	4.86415	3.67696	9.1	2.6	2.90689	2.6	5.2	2.6	1.3	1.83848	5.95735	2.90689
5.2	1.83848	3.9	2.25167	3.67696	3.18434	3.67696	5.2	5.36004	3.67696	9.00666	2.6	2.6	2.6	5.2	1.83848	1.3	1.83848	5.36004	1.83848
4.31161	3.67696	3.9	3.67696	3.18434	3.9	3.9	5.2	5.36004	3.67696	3.9	2.6	2.6	2.6	3.9	2.90689	1.3	1.3	5.81378	2.90689
4.68722	3.9	4.11096	2.90689	2.90689	3.67696	3.67696	5.36004	4.86415	4.86415	3.9	2.6	2.6	2.90689	3.9	3.18434	1.3	2.6	5.36004	2.90689
4.68722	3.18434	3.67696	3.67696	2.90689	2.90689	3.67696	5.36004	4.68722	3.67696	2.25167	2.6	2.90689	3.67696	3.9	2.6	1.3	1.83848	5.66657	2.90689
4.68722	1.83848	3.67696	2.25167	3.67696	3.67696	2.6	5.81378	5.36004	3.9	8.72067	2.6	2.90689	2.6	3.9	2.6	1.3	1.83848	5.51543	3.18434
5.36004	3.18434	3.9	2.90689	2.90689	4.11096	4.11096	6.5	5.36004	3.18434	9.00666	2.6	2.6	3.18434	5.2	1.83848	1.3	2.6	5.36004	2.25167
4.68722	3.9	4.11096	2.6	3.18434	3.67696	2.90689	6.5	5.2	3.18434	3.9	2.6	2.6	2.90689	5.2	2.90689	1.3	2.25167	5.81378	2.90689
4.68722	3.67696	3.9	3.67696	2.6	2.90689	4.31161	6.62873	4.68722	5.36004	3.9	2.6	2.6	2.6	5.2	2.6	1.3	2.25167	5.66657	2.90689
4.68722	2.25167	3.67696	2.90689	1.3	3.18434	3.67696	5.81378	4.50333	3.9	2.6	2.6	2.6	3.18434	3.9	2.90689	1.3	1.3	5.66657	2.90689
4.31161	3.18434	3.9	3.18434	1.3	4.11096	4.11096	5.95735	4.86415	3.9	8.72067	2.6	6.5	3.18434	4.68722	1.83848	1.3	1.3	5.36004	2.90689
4.68722	3.9	4.11096	2.6	1.3	3.67696	3.67696	6.755	5.36004	3.67696	8.72067	2.25167	7.00071	2.90689	4.86415	3.18434	4.86415	2.90689	5.66657	2.90689
3.9	2.90689	3.9	3.67696	1.3	3.67696	3.9	6.62873	5.36004	4.86415	3.67696	1.83848	2.6	3.18434	4.31161	2.6	1.3	1.3	5.95735	2.25167
3.18434	1.83848	3.67696	2.90689	1.3	2.90689	3.67696	5.2	4.86415	3.9	3.9	1.83848	2.6	3.18434	5.2	1.83848	1.3	1.83848	5.66657	2.90689
4.68722	3.18434	3.9	3.18434	1.3	3.9	4.31161	6.5	4.50333	3.67696	1.83848	1.83848	2.6	2.90689	4.68722	2.90689	1.3	2.90689	5.81378	1.83848
4.68722	3.67696	3.9	2.90689	1.3	4.11096	3.18434	6.5	4.50333	4.50333	8.42496	1.3	2.6	2.90689	4.86415	2.90689	1.3	1.3	5.36004	2.90689
4.68722	3.9	2.90689	3.18434	1.3	3.67696	3.9	6.5	4.86415	3.67696	8.62322	1.3	2.6	2.90689	5.2	2.6	5.36004	1.83848	5.36004	2.90689
2.6	2.90689	4.11096	2.6	3.18434	3.18434	3.67696	6.5	4.86415	3.9	3.67696	4.68722	2.6	2.90689	5.2	2.25167	1.3	2.6	5.36004	2.90689
2.6	1.83848	3.67696	3.18434	2.90689	3.9	3.67696	6.62873	4.68722	3.18434	3.9	2.6	2.6	3.18434	3.9	3.67696	1.3	1.83848	5.2	1.83848
2.90689	2.90689	3.67696	2.90689	3.18434	4.11096	3.18434	6.62873	4.50333	3.67696	2.25167	2.6	2.6	2.90689	4.68722	2.90689	1.3	1.83848	5.2	2.90689
2.90689	3.18434	3.67696	3.9	2.6	3.18434	3.67696	6.62873	4.50333	4.86415	8.42496	2.6	2.6	3.67696	4.86415	1.83848	1.3	2.90689	5.2	2.90689
2.90689	3.67696	3.9	2.90689	2.6	2.90689	2.90689	6.62873	4.50333	4.50333	8.32406	2.6	2.6	2.90689	5.2	2.90689	1.3	2.6	5.2	2.90689
2.90689	3.67696	4.11096	3.67696	2.90689	3.67696	4.11096	6.62873	4.86415	3.67696	3.18434	2.6	2.6	3.67696	3.9	2.90689	1.3	1.3	4.86415	2.90689
2.6	3.67696	3.67696	2.6	2.6	3.9	3.18434	6.62873	4.86415	5.36004	3.9	2.25167	2.6	2.25167	3.9	2.6	1.3	1.83848	4.68722	1.3
4.68722	3.9	3.67696	3.18434	1.3	3.9	3.9	6.62873	4.50333	3.9	3.67696	1.83848	6.62873	3.18434	4.68722	2.25167	5.2	2.90689	4.68722	2.90689
4.86415	3.9	3.9	2.90689	1.3	3.67696	2.90689	7.90759	4.50333	3.9	2.90689	1.83848	2.90689	2.90689	4.86415	3.67696	1.3	1.83848	4.68722	2.90689
3.9	3.67696	4.11096	3.67696	1.3	2.90689	3.67696	7.90759	4.31161	3.67696	2.6	2.25167	2.90689	3.18434	4.86415	2.6	1.3	1.83848	4.31161	2.90689
4.86415	2.90689	4.11096	2.90689	1.3	3.67696	2.90689	7.90759	4.86415	5.36004	8.62322	1.83848	2.90689	2.25167	3.9	2.6	1.3	1.3	4.68722	2.90689
2.90689	2.25167	3.18434	3.67696	1.3	3.18434	3.67696	7.90759	4.68722	3.9	8.32406	1.83848	2.90689	3.67696	3.9	1.83848	1.3	2.6	4.50333	1.83848
4.31161	3.18434	3.9	2.6	2.90689	3.67696	2.6	7.8	4.50333	3.67696	4.11096	1.3	3.18434	1.83848	3.9	3.18434	1.3	1.83848	4.86415	2.90689
4.68722	3.67696	3.9	3.67696	2.90689	2.90689	3.67696	7.58024	3.67696	4.86415	3.9	1.3	2.6	3.67696	3.9	3.18434	1.3	1.83848	4.68722	2.90689
2.90689	3.9	3.9	2.6	3.18434	3.9	3.18434	7.58024	3.67696	3.9	2.6	4.11096	2.6	2.90689	4.11096	3.18434	5.36004	2.90689	4.86415	2.90689
4.86415	3.9	2.90689	3.67696	2.6	2.90689	3.67696	7.58024	3.67696	4.50333	8.42496	4.11096	2.6	2.6	4.11096	2.90689	5.36004	2.25167	4.68722	2.25167
2.6	3.9	3.9	2.6	2.6	3.67696	2.90689	7.58024	3.67696	3.18434	8.32406	4.11096	6.5	2.90689	4.11096	2.25167	1.3	2.25167	4.86415	3.18434
4.68722	2.25167	3.18434	3.67696	2.6	2.90689	4.11096	7.6909	3.67696	4.86415	4.11096	3.9	7.35391	3.67696	4.11096	2.90689	1.3	1.3	4.68722	2.90689
4.68722	3.18434	3.67696	2.6	2.6	4.31161	3.18434	7.8	4.31161	3.9	4.11096	3.18434	2.6	2.90689	4.11096	3.18434	1.83848	1.3	4.31161	2.90689
2.25167	3.67696	3.67696	3.18434	1.83848	3.67696	4.31161	7.46793	3.67696	4.50333	2.6	4.31161	2.6	3.67696	4.11096	2.6	1.3	3.18434	4.68722	2.90689
4.86415	3.67696	3.9	3.18434	1.3	2.90689	2.90689	7.12039	4.50333	2.90689	8.42496	4.11096	2.90689	2.6	4.68722	1.3	4.11096	2.25167	4.31161	2.25167
4.68722	3.9	4.11096	3.67696	1.3	3.67696	3.9	6.755	4.68722	4.86415	8.32406	2.6	2.6	2.90689	4.68722	2.90689	4.86415	1.3	4.86415	3.67696
2.25167	4.11096	3.67696	2.90689	1.3	2.90689	3.18434	6.62873	4.31161	4.50333	4.11096	2.6	2.6	2.90689	3.9	3.18434	5.2	1.3	4.31161	3.67696
4.68722	1.83848	3.67696	3.18434	1.3	3.9	4.11096	6.5	4.31161	2.90689	4.31161	2.6	2.6	2.90689	3.9	2.90689	4.68722	3.67696	4.86415	2.90689
4.68722	3.18434	3.9	3.18434	1.3	4.11096	2.90689	6.5	4.68722	5.36004	3.67696	2.6	2.90689	3.67696	4.11096	1.83848	4.68722	2.6	4.11096	2.90689
2.25167	3.67696	4.31161	3.67696	2.25167	3.18434	4.31161	7.00071	3.9	4.50333	1.83848	2.6	2.6	2.90689	4.31161	2.90689	1.3	1.83848	4.68722	2.25167
4.68722	3.9	3.67696	2.90689	3.18434	3.67696	2.90689	6.62873	3.67696	2.90689	8.32406	2.25167	7.00071	3.18434	4.68722	3.18434	1.83848	1.3	4.31161	3.67696
4.68722	3.9	4.11096	3.67696	3.18434	3.67696	4.50333	6.5	3.67696	5.36004	8.42496	1.83848	7.00071	2.90689	4.68722	2.90689	1.83848	2.90689	4.31161	3.67696
1.83848	2.25167	4.11096	3.18434	2.6	3.9	2.90689	6.5	3.67696	4.50333	3.9	1.3	2.6	2.90689	4.68722	2.25167	3.67696	1.83848	4.31161	2.90689
4.68722	3.18434	4.31161	3.18434	2.25167	3.9	3.9	7.00071	3.67696	2.90689	3.9	3.18434	2.6	2.90689	4.31161	2.90689	4.31161	1.83848	4.11096	2.90689
4.86415	3.9	3.9	2.90689	1.83848	3.18434	2.90689	6.755	3.67696	4.86415	3.18434	3.67696	2.90689	3.67696	4.31161	3.18434	4.86415	2.6	4.31161	2.6
1.83848	3.9	3.9	3.67696	1.3	3.67696	4.31161	6.62873	3.67696	4.50333	2.90689	3.67696	2.6	2.90689	4.68722	3.18434	4.68722	1.83848	4.31161	3.67696
4.86415	2.25167	3.9	3.18434	1.3	3.67696	2.25167	6.5	4.86415	2.90689	8.22192	3.67696	2.6	3.18434	4.68722	2.90689	2.6	1.3	3.9	3.67696
4.68722	3.67696	2.90689	3.18434	1.83848	4.50333	3.9	6.36867	3.67696	3.67696	8.32406	3.18434	2.6	2.6	4.31161	2.25167	2.6	3.67696	4.50333	2.90689
2.25167	3.67696	2.90689	2.90689	1.83848	3.67696	1.83848	6.5	4.50333	5.36004	3.9	3.9	2.6	2.90689	4.31161	3.18434	3.67696	1.3	4.11096	2.90689
4.86415	3.67696	3.18434	3.9	1.83848	3.67696	3.67696	6.5	2.90689	4.31161	2.90689	1.83848	2.6	2.90689	4.68722	2.90689	4.86415	1.83848	4.31161	2.90689
2.25167	3.67696	3.67696	2.6	1.3	3.9	2.25167	6.5	2.90689	3.9	8.01374	2.6	7.12039	3.67696	4.68722	1.83848	4.31161	1.3	4.31161	2.25167
4.68722	3.67696	3.9	3.18434	1.3	4.68722	4.31161	6.5	3.67696	3.67696	3.9	2.6	2.6	2.90689	4.11096	3.18434	2.6	1.83848	4.31161	3.18434
4.31161	1.83848	2.90689	2.6	1.3	3.18434	2.25167	6.36867	3.67696	5.36004	3.67696	2.6	2.6	3.67696	4.11096	3.67696	2.90689	1.83848	4.68722	3.67696
4.68722	3.9	3.18434	3.67696	1.3	3.67696	3.9	5.81378	3.67696	3.9	2.90689	2.25167	2.6	2.90689	4.31161	2.90689	2.6	3.67696	4.11096	3.18434
2.25167	4.11096	3.18434	2.90689	1.3	3.18434	1.83848	5.51543	3.67696	4.31161	2.6	1.83848	2.6	2.90689	4.11096	2.6	2.6	1.3	4.31161	2.90689
4.68722	3.18434	3.67696	2.90689	1.3	3.67696	3.67696	5.81378	4.86415	3.67696	8.22192	1.83848	2.6	2.90689	4.11096	3.67696	3.67696	1.3	4.68722	2.6
1.83848	2.25167	3.67696	2.25167	1.3	3.9	2.25167	5.95735	3.9	5.36004	7.90759	3.18434	2.6	3.67696	4.11096	3.18434	3.67696	1.3	4.11096	3.18434
4.68722	3.18434	3.18434	3.18434	1.3	4.68722	4.50333	6.36867	4.50333	4.86415	7.12039	3.9	2.6	2.6	3.9	2.90689	4.11096	2.6	4.31161	3.67696
4.31161	3.67696	3.67696	2.6	2.90689	2.90689	2.90689	6.36867	2.90689	3.67696	3.67696	3.67696	2.6	3.67696	4.11096	2.25167	4.31161	2.25167	4.31161	2.6
1.3	3.9	3.67696	3.18434	3.67696	3.18434	3.9	5.81378	3.9	4.86415	2.90689	3.18434	2.6	2.90689	3.9	2.90689	2.6	2.6	3.18434	2.6
4.68722	3.9	3.9	1.83848	2.6	3.67696	2.90689	5.36004	4.50333	4.86415	8.01374	3.67696	7.35391	3.67696	4.31161	3.18434	2.90689	1.3	4.31161	2.25167
4.68722	2.90689	2.90689	3.67696	2.6	3.67696	3.67696	5.2	4.31161	3.67696	7.46793	2.6	7.00071	2.90689	4.11096	3.18434	2.6	1.3	4.11096	3.18434
4.68722	2.90689	3.67696	2.6	1.83848	4.68722	2.6	5.81378	3.9	5.36004	2.90689	2.6	6.5	2.90689	4.11096	2.90689	4.11096	1.3	4.11096	3.67696
2.25167	3.18434	2.6	3.18434	2.25167	3.67696	4.50333	5.81378	4.11096	4.68722	3.67696	2.6	2.90689	2.90689	4.11096	2.6	3.9	2.6	4.31161	3.67696
4.68722	3.67696	3.67696	2.25167	1.83848	3.67696	2.90689	5.36004	3.67696	3.67696	2.90689	2.25167	2.90689	3.67696	4.11096	3.67696	4.68722	2.6	4.11096	2.90689
4.68722	3.18434	3.67696	3.67696	1.83848	3.67696	3.9	5.2	3.67696	5.36004	7.6909	1.83848	2.6	2.90689	4.31161	2.90689	3.9	2.25167	4.68722	2.6
1.83848	3.67696	3.18434	2.25167	1.3	4.68722	2.90689	5.2	4.50333	5.81378	7.6909	2.90689	2.6	3.67696	4.31161	2.6	3.9	2.90689	4.11096	2.90689
4.86415	3.9	3.67696	2.90689	1.3	3.18434	3.67696	5.2	4.86415	5.51543	7.00071	3.18434	2.6	2.90689	3.67696	3.18434	3.67696	1.3	4.31161	3.18434
4.68722	4.11096	3.18434	2.90689	1.3	3.67696	2.6	5.2	3.18434	3.67696	2.90689	3.18434	2.6	3.18434	3.9	3.18434	3.67696	1.3	4.68722	3.18434
4.31161	3.18434	2.90689	3.18434	2.90689	3.67696	4.31161	5.95735	3.67696	4.86415	3.9	3.67696	2.6	2.90689	4.31161	2.90689	2.90689	2.6	4.31161	2.6
1.83848	2.90689	3.18434	2.25167	2.90689	3.9	2.90689	5.81378	4.86415	5.95735	2.90689	3.67696	2.6	3.67696	4.68722	2.90689	4.86415	2.6	4.86415	2.25167
4.86415	3.67696	2.6	3.67696	3.18434	4.86415	3.9	5.81378	4.86415	3.67696	7.58024	3.18434	6.36867	2.6	4.31161	2.6	4.86415	1.83848	5.2	2.25167
4.86415	3.67696	3.18434	2.90689	2.6	4.31161	2.25167	5.81378	4.68722	4.86415	2.90689	3.18434	3.18434	2.90689	2.90689	2.90689	4.68722	3.18434	5.2	2.90689
1.83848	3.9	2.6	3.67696	2.6	3.9	3.67696	5.81378	2.90689	5.95735	3.67696	2.25167	2.6	3.18434	2.90689	3.18434	5.51543	1.3	5.36004	2.90689
4.86415	3.9	2.90689	2.25167	2.6	3.67696	2.6	5.81378	5.36004	3.18434	3.9	2.6	2.6	2.90689	3.18434	3.67696	5.66657	1.3	5.36004	2.90689
4.86415	3.18434	2.90689	3.9	2.25167	3.67696	4.31161	5.81378	4.68722	4.68722	2.25167	2.6	2.6	3.67696	5.36004	3.18434	4.86415	2.6	5.36004	2.6
4.31161	3.67696	3.67696	2.90689	1.83848	3.67696	2.25167	5.81378	4.68722	6.62873	7.58024	2.25167	2.6	2.90689	4.68722	2.90689	4.86415	2.6	5.36004	2.90689
4.86415	3.67696	3.18434	3.67696	1.83848	4.50333	4.31161	5.51543	3.18434	3.67696	7.46793	1.83848	2.6	3.18434	4.68722	2.6	4.11096	2.6	4.86415	2.90689
2.25167	3.9	2.90689	2.90689	1.83848	4.50333	1.83848	5.36004	3.67696	4.86415	6.755	2.90689	2.6	2.90689	2.90689	3.67696	4.31161	1.3	4.86415	2.90689
4.86415	3.9	2.90689	3.67696	1.83848	4.11096	3.67696	5.2	4.86415	7.00071	3.18434	3.67696	2.6	3.67696	2.90689	2.90689	4.68722	1.3	3.67696	2.6
4.68722	3.67696	3.18434	2.6	1.83848	3.67696	1.83848	5.2	4.86415	3.67696	3.9	3.67696	2.6	2.90689	2.6	2.6	4.31161	1.3	4.68722	3.67696
2.25167	3.9	3.67696	3.67696	1.3	3.18434	4.31161	5.2	3.67696	5.36004	2.25167	2.90689	6.62873	2.90689	2.6	3.18434	4.31161	2.6	4.31161	3.18434
4.68722	4.11096	2.6	2.6	1.3	3.9	1.83848	5.36004	4.50333	6.5	7.6909	2.90689	6.36867	2.90689	2.6	3.67696	4.68722	2.6	4.68722	2.90689
4.86415	3.67696	3.67696	3.9	2.90689	3.9	3.9	5.36004	5.36004	3.67696	7.12039	2.6	5.95735	3.67696	2.90689	3.67696	4.68722	2.6	4.31161	2.90689
2.25167	4.11096	3.67696	2.6	3.67696	3.9	1.83848	4.11096	4.31161	5.36004	2.90689	2.6	2.90689	2.90689	2.6	2.90689	3.9	1.3	3.9	2.6
4.86415	4.11096	3.67696	3.18434	3.67696	3.67696	3.67696	4.68722	3.18434	6.36867	3.67696	2.6	2.90689	3.67696	2.6	2.90689	4.31161	2.6	4.11096	3.67696
4.68722	4.31161	3.67696	2.25167	2.90689	3.9	1.83848	4.31161	4.50333	3.67696	3.67696	2.25167	2.6	3.18434	2.6	2.6	4.11096	2.90689	3.67696	3.67696
2.25167	4.11096	3.18434	3.67696	2.6	3.9	4.50333	4.68722	4.68722	4.86415	2.90689	1.83848	2.6	3.67696	2.6	2.90689	3.18434	1.83848	4.50333	3.18434
4.86415	4.11096	3.67696	2.90689	1.3	4.11096	1.83848	4.31161	3.67696	6.62873	7.58024	2.90689	2.6	2.90689	4.31161	3.18434	4.31161	2.6	3.67696	2.90689
4.68722	4.11096	3.67696	3.67696	2.25167	3.67696	4.50333	4.11096	4.31161	3.67696	7.12039	3.18434	2.6	3.9	4.31161	3.67696	4.11096	1.3	4.31161	2.90689
2.25167	4.68722	3.9	1.83848	1.83848	2.90689	1.83848	5.2	5.36004	4.86415	7.00071	2.90689	2.90689	3.18434	2.90689	2.90689	4.68722	1.3	3.18434	2.90689
4.86415	3.9	3.9	3.67696	1.83848	3.67696	3.9	5.2	4.68722	6.09754	3.18434	2.90689	2.6	3.67696	2.90689	2.6	2.90689	2.6	3.67696	2.90689
4.68722	4.11096	4.11096	2.6	1.3	3.18434	2.25167	5.51543	3.18434	3.67696	3.67696	2.6	2.6	3.67696	2.90689	2.6	4.68722	1.83848	3.67696	3.18434
2.25167	4.11096	4.68722	3.9	2.90689	2.90689	3.67696	5.81378	3.18434	4.68722	2.90689	2.6	2.6	2.90689	2.6	3.18434	4.68722	1.83848	3.67696	3.18434
4.68722	4.11096	4.68722	2.6	3.9	3.67696	1.83848	5.81378	4.50333	5.66657	7.12039	2.25167	2.6	3.18434	2.6	3.67696	2.90689	2.90689	3.9	2.90689
4.86415	4.11096	4.11096	3.18434	2.90689	3.67696	4.31161	3.67696	5.51543	3.67696	6.755	2.90689	6.5	3.18434	2.6	2.90689	3.9	1.83848	3.67696	2.90689
4.68722	3.67696	1.83848	2.6	2.90689	3.9	1.83848	3.67696	3.18434	4.68722	2.90689	2.90689	2.6	2.90689	2.6	2.6	4.68722	2.6	3.67696	3.67696
4.68722	3.18434	1.83848	3.67696	1.83848	3.9	4.31161	3.67696	3.18434	5.95735	3.67696	2.6	2.6	3.67696	2.6	2.6	4.31161	1.83848	3.9	3.18434
1.83848	3.9	1.83848	2.6	1.83848	4.11096	1.83848	5.81378	4.50333	3.67696	3.18434	2.90689	2.6	2.90689	2.6	3.18434	2.90689	2.6	3.9	3.18434
4.86415	3.9	1.83848	3.67696	1.83848	3.9	3.9	3.67696	5.95735	4.68722	2.25167	3.18434	2.6	3.18434	2.6	3.67696	4.86415	1.3	3.67696	2.90689
4.68722	3.18434	1.3	2.90689	1.83848	2.90689	1.83848	3.67696	5.95735	5.36004	7.12039	2.6	2.6	2.6	2.90689	3.18434	4.31161	1.3	3.67696	3.67696
2.25167	2.90689	1.83848	3.67696	1.3	3.67696	3.67696	3.9	4.86415	3.67696	6.5	2.90689	2.90689	2.90689	3.67696	2.90689	2.6	2.6	4.50333	3.18434
4.86415	3.9	1.3	2.6	1.3	2.90689	1.83848	3.9	3.18434	4.68722	2.90689	2.6	2.6	2.6	3.67696	2.90689	4.68722	2.6	4.86415	3.67696
5.36004	3.67696	1.3	2.90689	1.3	2.6	4.50333	3.67696	3.18434	4.86415	3.18434	1.83848	2.6	3.18434	4.68722	2.90689	4.31161	1.3	5.36004	3.18434
4.68722	3.9	1.3	2.90689	1.3	3.67696	1.83848	3.9	4.50333	3.67696	2.6	2.90689	5.81378	3.9	4.68722	3.18434	2.90689	1.3	3.67696	2.90689
4.31161	3.18434	1.3	3.67696	1.3	3.9	4.11096	3.67696	5.95735	4.86415	7.00071	2.90689	5.81378	2.90689	4.68722	3.67696	4.31161	2.6	3.67696	2.6
1.83848	3.67696	1.83848	2.6	1.3	3.9	1.83848	3.67696	2.90689	4.86415	7.00071	3.67696	2.6	3.67696	4.68722	2.90689	2.90689	2.90689	3.67696	2.90689
4.86415	3.9	1.83848	3.67696	1.3	3.9	4.31161	3.67696	2.90689	3.18434	6.36867	2.90689	2.6	3.18434	4.86415	2.90689	2.90689	2.6	3.67696	4.11096
5.2	3.9	2.25167	2.90689	1.3	3.9	1.83848	3.67696	4.31161	3.9	2.90689	2.90689	2.25167	3.67696	4.68722	2.90689	4.11096	2.90689	3.67696	2.90689
2.25167	3.9	1.83848	3.67696	1.3	3.9	4.50333	7.00071	5.95735	5.36004	3.67696	2.90689	2.6	3.9	4.68722	2.6	3.9	1.83848	3.9	3.18434
5.36004	4.11096	2.25167	2.90689	2.90689	4.11096	1.83848	3.9	3.18434	5.36004	2.6	1.3	2.6	3.9	4.31161	2.90689	2.90689	1.83848	3.18434	3.67696
4.86415	3.9	2.25167	3.67696	3.67696	4.31161	4.31161	3.67696	4.50333	3.9	7.12039	2.90689	2.6	4.11096	4.11096	3.67696	4.11096	2.6	2.90689	3.67696
5.2	4.68722	1.83848	2.6	3.67696	4.31161	1.83848	3.67696	5.95735	4.86415	6.5	2.90689	2.6	3.67696	3.9	2.90689	3.9	2.6	2.90689	3.67696
1.83848	5.36004	3.9	3.18434	2.6	3.67696	4.68722	3.67696	3.18434	5.36004	2.6	4.31161	6.5	4.11096	3.67696	3.18434	2.90689	2.6	2.90689	2.90689
5.36004	3.9	4.11096	2.90689	2.6	2.90689	1.83848	3.18434	4.50333	3.9	3.18434	3.9	2.6	3.9	2.90689	2.90689	4.50333	2.6	2.90689	4.68722
4.68722	3.9	3.9	3.67696	2.6	2.90689	4.31161	3.67696	5.95735	5.36004	2.90689	3.9	2.6	3.67696	2.90689	2.6	2.90689	1.83848	3.67696	3.67696
2.25167	4.11096	2.25167	2.90689	1.83848	3.9	1.83848	3.18434	3.18434	5.36004	2.6	3.9	2.6	2.90689	2.90689	3.67696	2.90689	1.83848	4.31161	3.9
5.2	4.11096	2.6	3.9	1.83848	4.11096	3.9	3.67696	4.50333	5.51543	7.00071	3.18434	2.6	3.18434	2.90689	2.6	4.11096	1.3	4.31161	3.67696
5.36004	4.11096	2.25167	2.90689	1.83848	3.67696	2.25167	3.67696	5.95735	5.66657	6.755	1.83848	2.6	3.9	3.9	3.18434	2.6	2.6	3.67696	3.18434
4.68722	4.68722	2.6	3.18434	1.83848	3.9	4.50333	3.67696	5.66657	4.86415	6.36867	2.90689	2.6	2.6	4.31161	3.18434	3.67696	2.6	3.9	2.6
1.83848	4.68722	1.3	2.6	1.3	3.9	1.83848	3.67696	2.90689	3.9	2.90689	2.6	2.6	3.9	5.2	2.6	3.67696	2.90689	4.11096	2.25167
4.86415	4.68722	1.3	3.67696	1.3	3.9	4.31161	3.9	4.86415	5.51543	2.90689	4.68722	2.6	2.90689	4.68722	3.18434	3.67696	2.90689	4.11096	4.31161
5.36004	4.11096	1.3	2.90689	1.3	3.9	1.83848	3.9	6.09754	6.5	3.67696	2.25167	7.00071	3.9	4.11096	3.67696	2.6	1.83848	4.11096	4.68722
5.36004	4.11096	1.83848	3.67696	1.3	3.9	3.9	3.67696	2.90689	4.31161	7.00071	2.90689	5.81378	3.18434	4.11096	3.18434	3.9	1.83848	4.11096	3.67696
1.3	4.86415	2.25167	2.90689	1.3	3.9	1.83848	4.11096	2.90689	4.11096	6.5	2.6	2.6	3.9	2.6	2.6	2.6	1.83848	4.11096	2.90689
4.86415	5.2	2.25167	2.90689	1.3	4.31161	4.50333	4.11096	4.86415	3.9	2.90689	4.11096	2.6	2.90689	3.18434	2.90689	3.9	2.6	3.67696	3.18434
5.36004	5.2	2.25167	2.90689	1.3	4.31161	1.83848	4.11096	6.36867	3.67696	2.90689	1.83848	2.6	4.11096	2.90689	3.67696	2.90689	2.6	3.67696	3.67696
5.36004	4.68722	1.83848	3.67696	2.90689	4.31161	4.11096	4.11096	5.81378	3.67696	2.90689	3.18434	2.25167	2.90689	3.18434	2.90689	3.67696	2.90689	3.67696	3.67696
1.83848	4.31161	1.83848	2.90689	3.18434	4.31161	1.83848	4.11096	3.18434	3.67696	6.755	2.90689	1.83848	4.11096	3.67696	2.90689	3.9	3.67696	3.67696	3.67696
5.36004	4.86415	1.83848	2.90689	3.18434	3.9	4.31161	4.11096	4.50333	3.67696	6.755	1.83848	2.6	3.18434	4.11096	3.18434	2.6	1.83848	3.67696	3.67696
5.36004	2.90689	1.3	2.90689	2.6	3.9	1.83848	4.11096	5.95735	3.67696	5.95735	3.67696	2.6	4.68722	4.68722	3.9	3.9	1.83848	3.18434	3.67696
5.36004	4.68722	4.11096	3.67696	2.6	3.67696	3.9	7.00071	3.18434	3.67696	2.6	2.6	6.755	2.90689	5.95735	2.90689	2.90689	2.6	4.31161	2.6
1.83848	2.6	2.90689	3.67696	2.25167	2.90689	1.83848	2.90689	4.50333	3.67696	2.90689	2.90689	7.00071	4.68722	2.90689	3.18434	3.9	2.90689	5.66657	3.9
5.66657	4.11096	3.18434	2.90689	1.83848	4.31161	3.67696	3.67696	5.36004	3.67696	2.6	2.25167	2.6	2.90689	4.11096	2.90689	3.67696	2.6	6.5	3.67696
5.36004	4.68722	3.67696	2.6	1.3	4.11096	1.83848	4.68722	2.90689	2.90689	2.6	2.90689	2.6	4.86415	2.90689	2.90689	2.6	3.67696	5.36004	3.67696
1.83848	4.68722	3.18434	3.67696	2.90689	3.9	4.50333	4.68722	4.50333	3.18434	6.5	2.90689	2.6	3.18434	2.90689	2.90689	4.11096	1.3	5.36004	3.67696
5.36004	4.68722	2.90689	2.6	3.18434	4.11096	1.83848	4.68722	4.86415	3.18434	7.00071	2.90689	2.25167	4.50333	2.90689	3.67696	2.6	1.83848	4.11096	2.90689
5.51543	4.68722	2.6	3.18434	2.90689	3.67696	4.31161	4.11096	2.90689	2.90689	2.90689	2.25167	2.6	2.90689	2.6	3.67696	3.9	1.83848	3.67696	3.67696
5.2	4.31161	2.25167	2.6	2.6	3.67696	1.83848	4.31161	2.90689	3.18434	2.90689	2.90689	6.62873	4.31161	3.18434	2.90689	2.90689	1.83848	3.9	3.67696
2.25167	3.9	2.90689	2.90689	2.6	2.90689	3.9	4.68722	4.50333	2.90689	2.6	2.90689	6.36867	4.86415	5.2	3.67696	3.67696	2.6	3.18434	3.9
5.66657	4.11096	2.6	2.6	2.6	2.90689	1.83848	4.31161	4.31161	3.18434	6.36867	2.90689	2.6	3.18434	2.6	2.90689	3.9	2.90689	2.6	3.9
5.66657	4.11096	2.6	3.18434	2.6	5.36004	4.50333	4.11096	4.68722	2.90689	6.5	1.83848	1.3	3.18434	2.6	2.6	2.6	2.6	3.67696	3.9
5.36004	4.11096	4.11096	2.25167	2.6	4.31161	1.83848	4.86415	2.90689	2.90689	6.5	2.6	1.3	3.18434	2.6	3.67696	4.11096	2.6	3.18434	2.90689
1.83848	4.31161	3.67696	3.18434	2.25167	4.31161	4.50333	4.86415	4.50333	2.90689	3.18434	2.90689	1.3	3.67696	2.6	2.90689	2.90689	3.67696	3.67696	1.83848
5.95735	4.68722	3.67696	2.25167	1.83848	4.11096	1.83848	4.86415	4.31161	2.90689	2.90689	2.90689	2.6	3.9	4.31161	3.18434	3.9	3.67696	3.9	3.67696
5.51543	4.68722	3.67696	3.67696	1.83848	3.9	4.31161	4.86415	2.90689	2.25167	3.67696	2.25167	2.6	4.68722	2.6	2.90689	2.6	1.83848	5.51543	2.6
1.83848	4.31161	3.67696	2.25167	1.83848	3.9	1.83848	5.36004	2.25167	1.83848	5.81378	2.6	2.6	3.18434	2.6	2.6	3.67696	3.18434	4.31161	2.90689
6.09754	4.11096	2.6	2.6	1.83848	3.9	4.50333	5.66657	4.50333	1.83848	6.36867	2.90689	6.5	3.18434	2.6	2.6	3.9	2.90689	3.67696	3.18434
5.66657	3.9	2.90689	2.25167	1.83848	2.90689	2.25167	6.36867	3.67696	3.67696	5.81378	2.90689	5.81378	3.67696	2.6	2.90689	2.90689	2.6	3.67696	3.18434
5.36004	3.9	2.90689	3.67696	1.3	2.90689	4.31161	6.62873	4.11096	5.51543	3.18434	1.83848	2.90689	2.90689	4.86415	3.67696	3.9	3.9	3.67696	3.67696
1.83848	4.11096	2.6	2.25167	1.3	4.86415	2.25167	6.5	2.25167	6.62873	2.90689	2.90689	2.6	2.90689	2.6	3.67696	2.90689	2.6	3.67696	3.67696
6.36867	5.51543	2.90689	3.18434	1.3	5.2	4.50333	7.00071	4.50333	7.35391	2.90689	2.90689	2.6	4.31161	1.83848	2.90689	3.9	2.6	3.67696	3.9
6.09754	5.36004	4.31161	2.25167	2.90689	4.68722	1.83848	7.00071	3.18434	6.5	5.2	1.83848	2.25167	2.90689	3.9	3.18434	3.67696	2.6	3.67696	3.9
5.81378	5.51543	4.31161	2.90689	3.18434	4.11096	4.50333	3.9	3.67696	5.95735	5.51543	2.6	1.83848	4.31161	2.6	2.90689	2.6	3.18434	3.67696	4.11096
1.83848	5.36004	3.9	2.25167	3.67696	3.18434	2.25167	3.9	1.83848	4.68722	5.51543	2.90689	2.6	2.90689	4.11096	2.90689	4.11096	2.90689	3.67696	4.11096
6.36867	5.36004	2.90689	3.67696	2.25167	3.18434	3.9	3.9	1.83848	5.36004	5.36004	2.90689	2.25167	3.67696	2.6	2.90689	2.6	4.68722	4.50333	4.11096
6.36867	5.36004	2.90689	2.25167	1.83848	3.67696	2.25167	4.31161	1.83848	2.25167	2.90689	1.83848	1.83848	3.67696	2.6	3.67696	3.9	3.9	4.11096	4.11096
6.36867	4.68722	2.6	3.67696	1.83848	2.90689	3.67696	4.11096	1.83848	1.83848	2.90689	2.25167	2.6	3.18434	3.67696	2.6	2.6	3.9	4.11096	4.31161
1.83848	4.68722	2.90689	2.6	1.83848	2.90689	2.25167	4.11096	1.83848	3.67696	2.6	2.90689	2.6	2.90689	2.6	2.90689	2.6	3.67696	3.67696	4.11096
6.09754	3.18434	2.6	3.18434	1.83848	4.11096	3.9	3.9	1.83848	1.83848	5.2	2.90689	2.6	3.67696	2.25167	2.90689	3.9	2.6	3.9	1.83848
6.36867	5.66657	3.18434	2.6	1.83848	4.68722	2.25167	4.11096	1.83848	1.83848	5.51543	2.25167	6.36867	3.67696	3.67696	3.18434	3.9	3.18434	4.31161	2.90689
6.36867	5.36004	4.11096	3.18434	1.83848	4.68722	4.31161	3.67696	1.83848	1.83848	5.36004	1.83848	2.90689	5.36004	1.83848	2.90689	2.6	2.90689	3.67696	3.18434
6.36867	4.68722	2.90689	2.25167	1.83848	3.67696	2.25167	2.90689	2.25167	5.95735	2.90689	2.90689	1.83848	4.86415	2.90689	2.6	4.31161	5.36004	3.67696	3.67696
1.83848	4.68722	3.67696	3.67696	1.83848	2.90689	4.68722	2.6	4.50333	6.5	2.6	2.6	1.83848	3.67696	2.25167	3.67696	2.6	2.6	3.18434	3.9
5.95735	2.6	3.18434	2.6	1.3	3.18434	2.25167	4.86415	3.67696	6.5	3.67696	2.6	1.3	2.90689	2.6	3.67696	4.11096	2.90689	3.67696	4.11096
6.36867	2.6	3.18434	3.67696	1.3	3.9	4.31161	5.51543	2.90689	3.67696	5.51543	2.90689	1.83848	2.90689	2.25167	2.90689	2.6	2.90689	3.18434	4.11096
6.36867	3.67696	2.90689	2.90689	1.3	4.11096	2.25167	7.12039	2.6	2.90689	5.2	2.90689	6.36867	3.18434	2.6	3.18434	2.6	5.36004	3.9	4.31161
6.36867	3.67696	1.83848	3.67696	1.3	4.31161	3.9	7.90759	2.90689	2.90689	2.90689	2.6	2.6	2.90689	2.6	2.90689	3.9	2.90689	2.90689	4.68722
1.3	4.11096	3.18434	2.6	1.3	3.67696	2.25167	8.01374	2.90689	2.90689	2.6	1.83848	1.83848	3.67696	2.90689	3.18434	4.31161	2.6	2.6	4.68722
6.5	4.31161	2.6	3.67696	1.3	3.67696	4.31161	8.22192	2.25167	2.90689	3.67696	2.90689	1.83848	3.18434	2.6	2.90689	2.90689	2.90689	2.90689	4.31161
1.83848	5.2	2.25167	2.25167	1.3	2.90689	2.25167	7.90759	1.83848	2.6	5.81378	2.90689	1.83848	3.67696	2.6	3.67696	4.11096	5.2	2.90689	4.11096
6.755	4.68722	2.25167	3.67696	1.3	3.67696	4.31161	8.01374	1.83848	2.25167	5.36004	2.25167	1.3	3.18434	2.6	2.90689	2.90689	2.90689	2.6	4.11096
6.5	4.86415	1.3	2.25167	2.90689	2.90689	2.25167	7.90759	1.83848	2.6	5.36004	2.25167	1.3	3.67696	2.90689	3.18434	3.9	2.6	4.31161	3.9
1.83848	4.68722	3.67696	3.18434	2.90689	4.11096	4.86415	5.51543	1.83848	2.6	2.90689	2.90689	1.83848	2.90689	2.25167	3.67696	3.67696	2.90689	2.90689	3.9
6.62873	4.68722	2.25167	2.90689	2.6	3.67696	2.25167	5.66657	1.83848	1.83848	2.6	2.25167	5.95735	3.67696	2.25167	2.6	2.90689	2.90689	2.6	3.9
6.36867	2.90689	2.25167	2.90689	2.6	3.67696	4.68722	5.81378	1.83848	5.66657	2.90689	1.3	6.09754	3.18434	2.6	2.90689	3.67696	2.6	2.6	3.9
6.5	3.67696	2.6	3.67696	2.6	2.90689	2.25167	5.95735	1.83848	6.09754	5.2	2.6	2.6	3.9	2.6	3.18434	4.11096	4.68722	2.6	2.25167
1.3	3.9	2.25167	2.90689	2.6	2.90689	4.68722	6.36867	1.83848	6.09754	5.51543	2.90689	1.3	4.68722	2.90689	3.18434	3.18434	3.67696	4.31161	2.90689
6.755	3.67696	3.9	3.67696	1.3	2.6	2.25167	7.58024	2.25167	3.67696	5.36004	2.25167	1.3	4.68722	2.6	2.90689	3.67696	3.18434	2.90689	2.90689
6.5	3.67696	2.6	2.6	1.83848	4.31161	4.86415	7.00071	4.50333	2.6	5.36004	1.3	1.3	5.36004	2.90689	2.6	2.90689	3.18434	2.90689	3.9
6.5	3.9	2.90689	2.90689	1.83848	3.9	2.25167	4.68722	3.67696	2.90689	5.36004	2.90689	1.3	5.51543	2.25167	3.67696	4.31161	4.11096	2.6	4.11096
1.83848	3.9	2.90689	2.6	2.90689	3.67696	4.68722	4.68722	2.90689	2.90689	2.90689	2.90689	1.3	5.66657	2.6	2.90689	3.9	3.18434	3.18434	4.31161
6.62873	2.90689	3.67696	3.67696	3.67696	3.67696	2.90689	6.62873	2.90689	2.90689	2.90689	1.83848	5.95735	5.95735	1.83848	3.67696	3.67696	3.18434	2.6	4.31161
7.00071	3.67696	2.6	2.90689	2.6	2.6	4.86415	6.36867	2.90689	3.18434	2.6	1.3	2.6	2.90689	2.6	2.6	4.11096	3.67696	3.67696	4.11096
7.00071	3.9	2.90689	2.90689	2.6	2.90689	2.25167	5.95735	2.90689	2.90689	5.36004	2.90689	1.3	3.67696	1.83848	2.90689	3.67696	2.90689	3.9	4.11096
6.5	3.9	2.6	2.90689	2.25167	2.6	4.31161	4.11096	2.25167	6.36867	5.36004	2.90689	5.66657	4.50333	3.18434	2.90689	3.9	3.67696	2.90689	2.90689
6.5	3.9	2.25167	3.67696	1.3	2.6	2.90689	4.11096	4.50333	6.09754	5.2	1.3	5.95735	4.68722	2.25167	3.18434	3.67696	4.11096	2.90689	2.90689
1.3	3.9	3.9	2.90689	1.3	4.11096	4.68722	3.9	3.67696	6.09754	3.67696	1.83848	2.90689	4.31161	2.6	2.90689	3.9	3.67696	2.6	4.31161
7.00071	3.67696	2.90689	3.18434	1.3	3.9	3.18434	4.68722	3.67696	6.09754	2.90689	2.90689	5.66657	2.90689	2.6	2.90689	4.11096	3.67696	2.90689	4.11096
7.00071	3.67696	2.25167	2.90689	1.3	3.9	4.86415	4.68722	3.67696	3.67696	2.6	2.25167	2.6	3.67696	2.6	2.6	3.67696	4.11096	2.90689	2.90689
6.62873	3.18434	3.9	2.90689	1.3	3.67696	2.90689	3.67696	3.67696	2.6	5.2	1.3	5.66657	3.9	2.6	4.11096	3.9	3.67696	4.31161	2.90689
2.25167	2.6	2.6	3.18434	1.3	3.9	4.86415	2.90689	2.6	2.6	5.2	2.6	4.86415	4.31161	3.67696	3.18434	3.9	3.67696	2.25167	4.31161
7.00071	2.25167	2.90689	2.90689	1.3	2.6	3.18434	3.18434	2.90689	6.36867	5.2	2.90689	2.6	3.18434	2.25167	3.67696	4.31161	4.68722	2.6	3.67696
6.62873	3.67696	2.6	3.18434	1.3	2.90689	3.18434	4.68722	2.90689	6.09754	5.2	1.83848	5.36004	3.67696	2.6	2.6	3.67696	2.90689	2.6	2.90689
1.83848	3.9	3.67696	3.18434	1.3	2.90689	4.86415	5.2	2.90689	3.67696	4.86415	1.83848	4.86415	3.9	1.83848	2.90689	4.11096	3.67696	2.90689	1.83848
7.12039	3.67696	2.90689	3.18434	2.6	2.6	3.67696	5.81378	2.25167	6.09754	5.2	2.90689	2.6	3.67696	2.25167	3.18434	2.6	3.9	2.6	2.90689
7.12039	3.9	2.90689	3.67696	2.6	4.31161	4.86415	5.95735	4.50333	3.67696	4.86415	1.83848	5.36004	3.67696	2.90689	3.18434	4.11096	3.9	2.6	3.18434
6.755	3.67696	3.9	3.67696	2.6	3.67696	3.18434	6.755	2.90689	6.36867	3.67696	1.3	2.90689	3.9	2.25167	2.90689	3.9	3.67696	4.31161	3.67696
6.5	2.90689	2.90689	2.90689	2.90689	3.9	3.18434	8.22192	3.67696	3.67696	3.67696	2.6	4.86415	3.67696	3.67696	2.90689	2.90689	2.90689	3.67696	2.25167
1.3	2.90689	2.6	3.18434	3.18434	3.67696	4.86415	8.22192	4.86415	6.09754	2.90689	2.90689	4.86415	3.18434	2.6	2.90689	4.11096	4.86415	2.6	2.90689
7.00071	2.25167	3.67696	3.18434	3.9	3.9	3.18434	8.32406	3.9	3.67696	2.90689	1.83848	2.6	3.67696	2.6	2.6	3.67696	2.90689	2.6	3.9
6.62873	3.67696	2.90689	2.90689	2.25167	3.67696	4.68722	8.22192	4.31161	6.755	5.36004	1.3	4.86415	2.90689	1.83848	2.6	3.9	3.9	2.90689	2.90689
1.83848	3.67696	2.90689	3.67696	1.83848	3.18434	2.90689	8.22192	3.67696	3.18434	5.2	2.90689	4.86415	3.67696	2.90689	2.6	2.90689	3.67696	3.67696	2.25167
7.46793	3.18434	2.6	2.6	1.83848	3.18434	3.18434	8.22192	3.9	3.9	5.36004	2.90689	2.6	3.9	1.83848	2.90689	4.50333	4.68722	2.90689	2.90689
7.46793	3.67696	3.67696	3.18434	1.83848	3.18434	4.86415	7.90759	3.67696	6.62873	5.2	1.83848	5.36004	3.67696	2.6	4.86415	2.90689	3.67696	3.67696	2.6
6.755	2.90689	2.90689	2.90689	1.83848	3.18434	2.90689	7.12039	2.25167	3.67696	5.2	1.83848	4.68722	3.67696	2.90689	2.90689	4.31161	3.9	2.6	3.18434
6.5	2.25167	2.90689	2.90689	1.83848	3.18434	3.18434	7.46793	4.50333	6.36867	4.68722	2.90689	2.6	3.67696	2.6	3.18434	4.11096	3.67696	4.11096	3.67696
1.3	2.90689	2.90689	3.9	1.3	3.67696	4.50333	6.36867	5.66657	3.67696	4.68722	2.6	4.86415	3.9	2.90689	3.67696	3.67696	3.67696	2.6	2.25167
7.00071	2.90689	3.18434	2.90689	1.3	3.9	2.90689	4.11096	4.31161	6.5	4.11096	2.25167	4.86415	3.67696	2.25167	2.90689	3.9	2.90689	4.68722	2.90689
7.46793	3.18434	2.90689	3.18434	1.3	3.67696	2.90689	3.9	5.66657	3.67696	3.9	1.3	2.90689	3.9	2.90689	2.90689	3.67696	4.86415	2.6	3.67696
7.12039	3.18434	2.90689	3.18434	1.3	3.9	4.50333	4.11096	5.36004	6.5	3.67696	2.90689	4.86415	3.67696	1.83848	3.18434	4.68722	3.9	4.68722	2.25167
7.00071	3.18434	2.90689	2.6	1.3	3.67696	2.90689	3.18434	3.67696	3.18434	3.18434	2.25167	4.86415	3.9	2.6	3.67696	4.31161	3.9	2.6	2.90689
6.5	3.18434	3.18434	2.25167	1.3	3.67696	2.90689	3.67696	3.67696	6.5	5.2	1.83848	2.90689	3.9	1.83848	4.11096	3.9	3.67696	4.68722	2.6
1.83848	3.67696	2.90689	3.67696	1.3	3.67696	4.86415	3.18434	2.90689	3.18434	5.36004	2.6	4.86415	3.18434	2.90689	4.68722	4.11096	2.90689	2.90689	3.9
7.00071	3.9	2.25167	1.83848	1.3	3.67696	2.90689	5.36004	1.83848	3.67696	5.36004	2.90689	2.6	3.67696	2.25167	5.36004	3.67696	5.36004	4.68722	4.11096
7.12039	3.9	3.67696	2.6	1.3	3.9	5.36004	3.18434	4.86415	6.36867	5.36004	1.83848	4.68722	4.11096	2.90689	4.86415	3.9	5.36004	2.90689	3.18434
1.3	3.67696	2.90689	2.90689	1.3	3.67696	3.67696	3.67696	4.68722	3.67696	4.86415	1.3	4.86415	3.9	2.25167	3.67696	3.67696	5.36004	4.31161	2.90689
6.62873	3.18434	2.6	2.90689	2.6	3.9	2.90689	3.9	5.51543	6.5	4.11096	2.90689	2.6	4.11096	2.90689	5.36004	3.9	4.86415	2.6	3.18434
6.62873	2.90689	3.67696	3.18434	1.83848	3.18434	2.90689	3.67696	6.09754	3.67696	3.9	1.83848	4.86415	3.9	1.83848	3.18434	4.11096	3.9	3.9	2.90689
7.46793	2.90689	2.90689	2.90689	1.83848	3.9	4.86415	3.67696	2.25167	3.9	3.67696	1.3	2.6	3.9	2.90689	3.9	3.9	3.9	2.6	3.67696
7.00071	2.25167	2.90689	2.6	2.25167	4.31161	2.90689	3.18434	1.83848	6.36867	3.9	2.6	5.2	4.31161	1.83848	3.67696	3.18434	3.9	4.50333	2.6
7.00071	3.67696	3.18434	2.90689	2.6	3.9	4.50333	5.51543	5.36004	3.9	4.86415	2.90689	4.68722	3.18434	2.90689	4.31161	4.11096	3.67696	2.6	1.83848
6.62873	3.18434	2.90689	2.90689	2.6	2.6	3.18434	2.90689	5.81378	7.00071	4.86415	2.25167	3.18434	3.67696	1.83848	3.18434	2.6	3.67696	3.67696	3.18434
1.83848	3.18434	2.6	2.90689	2.6	2.6	4.86415	2.6	1.83848	3.9	4.86415	1.83848	4.68722	3.9	3.18434	3.9	3.9	3.18434	2.6	2.90689
7.12039	3.67696	1.83848	2.90689	2.6	2.6	2.90689	3.18434	5.36004	3.9	4.68722	2.6	4.86415	3.9	1.83848	3.9	3.67696	4.86415	3.9	3.67696
7.46793	3.18434	3.18434	3.67696	2.6	2.6	3.18434	2.90689	4.86415	6.36867	4.86415	2.90689	2.90689	3.67696	3.67696	3.67696	4.11096	4.86415	2.6	3.67696
6.62873	2.90689	2.90689	2.6	2.6	2.6	5.36004	3.18434	5.36004	3.9	4.86415	1.83848	4.86415	4.11096	1.3	3.67696	3.9	4.68722	3.9	1.83848
5.95735	3.18434	2.90689	2.25167	2.6	2.6	3.67696	2.6	5.95735	6.5	4.86415	1.3	2.6	4.11096	3.67696	3.9	3.67696	5.36004	2.6	3.18434
1.83848	2.90689	2.90689	1.83848	2.6	2.6	2.90689	4.86415	5.36004	3.9	4.86415	2.90689	4.68722	3.67696	1.83848	3.67696	4.31161	4.86415	3.67696	2.90689
7.90759	2.90689	2.6	2.6	2.6	4.11096	3.18434	2.90689	2.25167	7.12039	3.9	2.6	4.86415	3.67696	3.67696	3.67696	3.18434	5.2	2.6	3.9
8.22192	2.6	2.6	2.90689	2.6	3.9	4.86415	2.90689	5.36004	3.9	3.9	2.90689	2.6	3.9	1.83848	3.67696	4.50333	4.68722	3.67696	2.25167
1.83848	2.25167	2.90689	2.90689	2.6	4.31161	3.67696	3.67696	5.2	6.62873	4.11096	1.3	4.86415	3.9	3.67696	3.67696	2.6	5.51543	2.6	3.67696
8.62322	3.18434	2.90689	2.90689	3.67696	3.67696	4.68722	2.90689	5.36004	3.9	4.68722	2.90689	2.90689	2.90689	1.83848	3.67696	4.11096	4.11096	3.9	4.11096
8.81703	3.18434	3.18434	2.90689	3.67696	3.9	3.9	4.68722	5.36004	7.00071	4.68722	2.6	4.11096	3.67696	3.67696	3.9	3.9	3.9	2.6	4.11096
1.83848	3.67696	2.90689	2.6	1.83848	4.31161	4.68722	2.90689	2.25167	3.9	4.86415	2.6	4.86415	4.11096	1.83848	3.67696	2.90689	3.9	3.67696	3.18434
9.1	2.90689	3.18434	2.6	1.83848	3.67696	3.67696	2.6	5.66657	7.00071	4.68722	1.3	4.50333	3.67696	3.67696	3.18434	4.11096	3.9	2.6	2.25167
8.72067	1.83848	2.90689	3.18434	1.83848	4.11096	3.18434	2.90689	5.51543	4.31161	4.86415	2.6	2.6	3.9	1.83848	3.9	2.6	3.9	3.9	3.18434
8.72067	3.18434	2.90689	2.90689	1.83848	4.31161	3.67696	2.6	5.36004	6.755	4.31161	2.90689	4.86415	3.9	3.67696	3.18434	3.9	3.9	2.6	3.18434
1.83848	2.90689	2.6	2.90689	1.83848	4.11096	4.86415	2.6	5.36004	3.9	4.11096	2.25167	2.6	4.11096	1.83848	3.18434	2.90689	3.9	3.9	4.11096
9.1	3.18434	2.90689	2.90689	1.83848	4.50333	3.67696	2.90689	4.86415	7.00071	5.2	1.3	4.68722	4.11096	3.18434	3.67696	4.31161	3.9	2.6	3.18434
2.25167	2.25167	2.90689	2.90689	1.83848	3.9	3.67696	4.68722	2.25167	3.9	5.36004	2.6	4.68722	3.9	1.83848	3.9	3.18434	3.9	4.11096	2.25167
9.28386	2.6	2.90689	2.90689	1.83848	4.68722	3.9	2.6	5.2	6.36867	5.36004	2.90689	2.90689	3.67696	2.90689	2.90689	2.6	4.11096	2.90689	2.6
8.72067	2.90689	2.6	2.90689	2.25167	4.11096	3.9	2.90689	2.25167	3.9	5.2	2.25167	4.68722	4.31161	1.83848	3.67696	3.9	4.11096	3.9	3.67696
8.22192	2.90689	2.90689	2.90689	2.6	4.31161	4.50333	2.6	4.86415	6.62873	4.68722	1.3	4.68722	3.67696	2.90689	3.67696	3.67696	4.31161	2.90689	3.67696
2.25167	2.90689	3.18434	2.90689	2.6	4.31161	4.50333	2.6	2.25167	3.67696	4.68722	2.90689	2.6	4.11096	1.83848	3.67696	2.6	4.31161	4.31161	2.25167
10.1533	2.6	2.6	2.90689	2.6	4.50333	4.50333	2.6	5.51543	6.755	4.11096	2.90689	4.68722	4.68722	2.6	3.18434	4.11096	4.31161	2.6	2.90689
9.81478	2.6	3.18434	2.6	2.6	4.68722	4.68722	4.68722	2.25167	3.67696	3.9	2.25167	4.50333	4.86415	2.25167	3.67696	2.90689	4.31161	4.11096	3.67696
9.19239	2.25167	2.90689	3.67696	1.83848	4.31161	4.68722	1.83848	1.83848	6.36867	3.9	1.3	2.6	4.31161	3.67696	3.67696	3.9	4.11096	2.6	3.67696
9.28386	2.6	2.90689	2.25167	1.83848	4.68722	4.68722	2.90689	4.68722	3.67696	3.67696	2.90689	3.18434	3.9	1.3	3.9	2.90689	4.31161	4.68722	2.25167
8.62322	3.18434	2.6	2.90689	2.25167	4.31161	5.36004	2.25167	2.25167	4.31161	2.6	2.6	4.86415	3.18434	3.67696	3.18434	3.67696	4.11096	2.6	3.9
1.83848	3.18434	2.6	2.25167	2.6	4.11096	5.36004	2.90689	4.31161	6.09754	2.6	2.25167	2.90689	3.9	1.83848	3.9	3.9	4.68722	4.11096	3.67696
10.4809	3.67696	2.6	2.6	2.6	4.68722	4.86415	3.67696	2.25167	4.50333	2.90689	1.3	4.68722	4.11096	3.67696	3.9	3.18434	4.31161	2.6	3.9
9.81478	3.18434	2.90689	2.90689	2.6	4.86415	1.3	2.90689	4.86415	6.36867	3.18434	2.90689	4.68722	4.31161	2.25167	2.90689	3.9	4.11096	4.50333	4.11096
9.98549	2.6	2.6	2.90689	2.6	4.11096	4.86415	4.86415	2.25167	4.31161	2.90689	2.6	2.6	4.11096	3.67696	3.67696	2.90689	4.31161	2.6	2.90689
9.28386	1.83848	2.90689	2.90689	2.6	4.68722	4.86415	2.90689	4.68722	5.95735	4.11096	1.83848	4.68722	3.9	1.3	3.67696	3.9	5.36004	3.9	3.9
1.83848	2.6	2.90689	2.6	2.6	4.86415	4.68722	3.67696	1.83848	4.31161	5.51543	1.3	4.50333	3.67696	3.67696	3.67696	3.9	4.68722	2.6	3.67696
9.90051	2.90689	2.90689	2.6	2.6	4.68722	3.9	4.86415	1.83848	6.09754	5.51543	2.90689	2.90689	3.9	2.25167	3.67696	3.18434	3.67696	3.9	3.9
10.4809	2.90689	2.90689	3.67696	3.67696	5.36004	4.86415	4.68722	4.50333	3.9	5.51543	2.6	4.86415	4.50333	3.67696	4.50333	4.11096	3.67696	2.6	2.25167
10.5612	3.18434	2.90689	2.90689	3.9	4.86415	1.3	3.18434	2.25167	6.09754	5.36004	2.25167	2.6	4.31161	2.25167	3.18434	3.18434	4.31161	3.67696	3.67696
9.98549	2.90689	2.6	2.90689	3.9	5.36004	1.3	5.36004	4.50333	3.9	5.2	1.83848	4.68722	3.67696	3.67696	3.67696	3.9	3.67696	2.6	4.31161
10.2362	3.18434	2.90689	3.67696	3.67696	5.36004	1.3	3.67696	1.83848	5.66657	5.2	2.90689	4.50333	3.67696	1.83848	3.18434	2.90689	4.11096	3.9	3.67696
9.46414	2.90689	2.6	2.90689	3.67696	4.68722	1.3	5.36004	4.31161	4.31161	4.86415	2.6	2.90689	4.31161	3.67696	4.31161	3.67696	3.18434	2.6	2.90689
1.3	2.6	3.67696	3.9	3.67696	5.51543	4.31161	4.68722	1.83848	5.81378	4.68722	1.83848	4.68722	4.11096	2.25167	3.18434	2.90689	3.67696	3.9	1.83848
9.90051	2.6	2.6	4.31161	3.67696	5.36004	5.36004	3.67696	1.83848	3.9	2.6	1.3	4.31161	4.11096	3.18434	3.67696	4.31161	3.18434	2.90689	3.67696
10.2362	2.6	2.90689	3.67696	3.67696	5.36004	3.9	5.36004	4.50333	6.09754	2.6	2.90689	2.90689	2.90689	2.25167	4.68722	2.90689	3.67696	3.67696	4.31161
10.4	2.25167	2.90689	3.67696	3.9	5.95735	3.9	3.67696	1.83848	4.31161	2.6	2.6	4.50333	3.18434	2.6	3.9	4.11096	3.67696	2.90689	3.67696
10.4809	2.6	3.18434	3.67696	4.11096	5.81378	3.9	5.36004	1.83848	6.09754	2.6	1.83848	3.9	3.9	2.25167	3.67696	3.18434	3.9	2.90689	2.25167
10.5612	2.6	2.6	2.90689	3.9	5.36004	2.6	4.68722	3.9	4.31161	2.6	2.6	2.6	4.11096	2.6	4.86415	3.9	3.9	2.90689	3.67696
1.83848	2.6	2.90689	3.18434	3.67696	5.81378	1.3	3.67696	2.25167	5.66657	2.6	2.6	4.31161	4.68722	2.25167	2.90689	3.9	4.11096	3.18434	3.18434
10.4	2.6	2.6	3.67696	4.11096	5.51543	3.9	5.36004	4.50333	4.31161	2.90689	1.83848	2.90689	4.68722	2.6	3.9	3.18434	3.18434	2.6	3.18434
10.4	2.6	2.6	4.86415	3.67696	5.36004	2.25167	3.18434	2.25167	6.09754	2.6	1.3	4.68722	3.9	2.25167	3.18434	4.11096	4.11096	3.9	4.31161
10.4809	2.6	2.90689	5.36004	3.67696	4.86415	4.31161	5.51543	4.31161	4.50333	3.9	2.90689	4.31161	3.67696	2.6	2.90689	3.18434	4.31161	2.6	3.67696
10.5612	2.6	2.6	3.67696	3.67696	5.36004	3.9	3.67696	2.25167	5.81378	4.68722	2.6	2.6	3.67696	1.83848	4.86415	4.11096	3.67696	3.18434	2.25167
1.3	2.6	2.90689	3.9	3.67696	4.86415	2.6	5.51543	4.50333	4.50333	4.68722	2.25167	4.31161	3.18434	2.6	2.90689	3.18434	4.31161	2.6	2.90689
10.1533	2.6	2.6	4.68722	2.90689	4.86415	3.67696	4.68722	2.25167	5.36004	5.36004	1.83848	3.9	4.11096	2.25167	3.9	3.9	3.18434	3.67696	2.90689
11.0309	2.6	2.6	3.67696	3.67696	5.2	4.68722	2.90689	4.50333	3.9	5.66657	2.90689	2.90689	4.11096	2.6	3.9	3.18434	4.11096	2.6	4.68722
11.0309	2.6	2.6	3.9	3.18434	4.68722	3.9	5.36004	2.25167	5.66657	5.2	2.25167	4.11096	2.90689	2.25167	3.9	3.9	4.31161	3.9	3.67696
2.25167	2.6	2.6	3.18434	3.67696	5.36004	2.6	3.67696	4.31161	3.9	5.81378	1.3	2.90689	3.67696	2.90689	2.90689	3.9	3.67696	2.6	2.25167
10.7986	2.25167	2.6	3.18434	3.67696	4.68722	4.31161	5.51543	2.25167	5.66657	5.51543	2.90689	3.9	4.11096	2.25167	4.86415	3.18434	4.31161	3.18434	1.83848
10.7986	2.6	2.6	3.67696	3.67696	4.68722	3.67696	2.90689	4.50333	4.31161	5.2	2.90689	4.31161	4.11096	2.90689	4.86415	4.11096	3.67696	2.6	2.90689
10.8766	2.90689	2.90689	3.67696	3.67696	4.86415	3.67696	5.51543	2.25167	5.36004	5.2	2.90689	2.90689	4.11096	2.25167	5.36004	2.90689	4.31161	3.67696	2.6
1.83848	2.6	2.90689	3.67696	3.18434	5.36004	3.67696	3.18434	4.50333	4.50333	2.6	1.83848	4.31161	3.9	3.18434	4.68722	3.9	3.67696	2.6	4.31161
2.25167	2.6	2.90689	3.67696	3.9	4.68722	3.67696	5.66657	1.83848	5.66657	2.6	2.90689	3.9	3.18434	1.83848	4.68722	3.18434	4.31161	3.9	3.67696
10.7986	2.6	2.6	3.18434	3.18434	4.86415	4.86415	3.18434	1.83848	4.68722	2.90689	2.90689	2.90689	3.67696	3.67696	4.68722	3.67696	3.67696	2.6	3.67696
11.183	2.6	2.90689	3.67696	3.67696	4.86415	1.3	5.66657	4.31161	5.66657	2.6	2.6	4.31161	3.67696	2.25167	4.11096	3.9	4.31161	3.18434	1.83848
10.7986	2.6	2.6	2.90689	3.67696	4.86415	1.3	3.18434	2.25167	4.50333	2.6	1.3	2.6	3.9	3.67696	3.67696	2.90689	3.9	2.6	1.83848
1.83848	2.25167	2.6	4.31161	3.9	4.68722	3.9	5.36004	4.50333	5.66657	2.6	2.90689	3.9	3.9	2.25167	3.9	4.11096	4.68722	3.67696	2.6
2.25167	2.25167	2.6	3.9	3.67696	5.51543	4.31161	3.67696	2.25167	4.31161	2.90689	2.6	3.9	3.9	3.67696	3.9	2.90689	4.11096	2.6	2.90689
11.1072	2.6	2.6	4.11096	3.9	5.36004	4.68722	4.86415	4.31161	5.66657	2.90689	2.25167	3.18434	3.9	2.25167	3.9	3.9	4.31161	3.67696	2.6
10.5612	2.6	2.6	4.68722	3.67696	4.68722	1.3	2.90689	2.25167	4.50333	2.90689	1.83848	4.31161	4.31161	3.67696	3.9	3.18434	4.11096	2.6	4.31161
2.25167	2.6	2.6	4.68722	3.9	5.2	4.86415	4.68722	4.31161	5.66657	2.90689	3.18434	3.9	3.18434	2.25167	3.9	3.67696	4.11096	3.67696	3.67696
2.25167	2.6	2.25167	4.11096	3.67696	5.36004	5.36004	3.67696	2.25167	3.9	2.90689	2.25167	2.6	3.67696	3.18434	3.67696	3.9	4.31161	2.6	2.25167
10.2362	2.6	3.18434	3.9	3.67696	5.36004	5.51543	4.11096	1.83848	5.66657	5.2	1.3	4.31161	3.67696	2.25167	4.86415	2.90689	4.31161	2.90689	2.90689
10.7201	2.25167	2.25167	4.86415	3.67696	5.66657	5.51543	2.90689	4.50333	4.31161	5.2	2.90689	3.67696	3.67696	2.90689	4.11096	3.9	4.68722	2.6	2.90689
10.5612	2.6	2.90689	4.68722	3.9	5.51543	5.66657	5.2	2.25167	5.66657	5.36004	2.90689	4.50333	3.67696	2.25167	4.68722	2.90689	4.68722	3.18434	2.6
10.5612	2.6	2.6	4.31161	3.67696	5.36004	5.36004	3.67696	4.31161	4.68722	5.51543	2.25167	3.9	3.67696	2.6	4.68722	3.67696	4.11096	2.6	4.31161
10.7201	2.6	2.6	4.11096	4.11096	5.95735	6.5	5.2	2.25167	5.36004	5.81378	1.83848	3.9	3.67696	2.25167	4.68722	3.18434	4.68722	3.67696	3.67696
10.4	2.6	2.6	3.9	3.67696	5.36004	5.36004	3.67696	4.31161	4.68722	5.51543	2.90689	4.50333	4.11096	2.6	4.68722	2.90689	4.11096	2.90689	2.25167
2.6	2.6	2.6	3.9	3.9	5.51543	3.9	4.86415	1.83848	5.36004	5.36004	2.90689	4.50333	3.18434	1.83848	4.68722	3.9	4.31161	2.90689	1.83848
2.6	1.83848	2.25167	3.67696	3.67696	5.66657	2.6	3.18434	4.50333	4.68722	5.2	2.25167	4.68722	3.9	2.6	4.68722	3.18434	4.31161	2.6	2.90689
2.25167	1.83848	2.6	3.18434	3.18434	5.36004	2.6	4.11096	2.90689	5.66657	5.2	2.6	4.31161	3.9	2.25167	4.31161	3.67696	4.31161	2.90689	4.31161
9.46414	2.6	2.25167	3.67696	4.11096	5.51543	2.6	2.90689	4.31161	4.68722	2.90689	2.90689	1.3	3.9	2.6	4.68722	2.90689	4.68722	2.6	3.67696
10.2362	2.6	2.6	3.67696	3.67696	5.36004	1.83848	3.9	2.90689	5.36004	3.67696	2.6	1.3	3.9	1.83848	4.31161	2.90689	4.11096	2.6	2.25167
9.98549	2.6	2.6	3.18434	3.9	5.2	5.2	3.18434	4.31161	4.68722	3.18434	2.25167	1.3	3.67696	2.6	4.68722	3.67696	4.68722	2.6	3.18434
10.7986	2.6	2.6	3.18434	4.68722	5.36004	4.68722	3.9	2.90689	5.36004	2.6	1.83848	1.3	3.67696	2.25167	4.31161	3.67696	4.11096	3.67696	2.6
2.25167	2.6	2.6	3.67696	4.31161	5.36004	4.31161	2.90689	2.25167	4.86415	2.90689	2.90689	1.3	3.67696	2.6	4.31161	3.18434	4.68722	2.6	2.6
2.6	2.6	2.6	3.67696	4.68722	5.36004	3.9	3.9	4.50333	4.86415	2.90689	2.90689	1.3	3.67696	2.25167	4.11096	3.18434	4.31161	3.18434	4.31161
2.6	2.90689	2.6	3.67696	4.86415	5.95735	5.66657	3.67696	2.25167	4.68722	2.90689	1.83848	1.3	4.50333	2.6	4.68722	2.6	4.31161	2.6	2.25167
2.25167	2.6	2.90689	3.18434	4.31161	5.81378	1.3	3.9	4.31161	4.86415	2.6	2.6	1.83848	4.11096	2.25167	5.2	3.18434	4.68722	2.90689	1.83848
9.98549	2.6	2.25167	3.67696	4.68722	5.36004	3.9	2.90689	2.25167	4.50333	4.11096	2.90689	1.83848	4.50333	2.6	4.50333	3.67696	4.11096	2.6	2.6
2.6	2.90689	2.90689	3.67696	4.11096	5.36004	1.3	3.9	4.31161	5.36004	5.2	1.83848	2.90689	4.31161	2.25167	4.68722	2.90689	4.31161	2.6	2.90689
2.6	2.6	2.6	3.67696	4.86415	5.51543	1.3	3.67696	2.25167	4.68722	5.2	2.90689	4.11096	4.11096	2.6	4.31161	2.90689	4.68722	2.6	2.6
2.6	2.90689	2.6	2.90689	4.86415	5.81378	1.3	4.11096	4.50333	4.86415	5.2	2.90689	4.68722	4.11096	1.83848	3.67696	3.67696	4.68722	2.6	4.68722
10.5612	2.6	2.6	3.9	4.68722	5.51543	1.83848	3.18434	2.90689	4.68722	5.2	1.83848	5.36004	4.11096	2.6	4.31161	2.90689	4.11096	2.6	4.68722
2.6	2.6	2.6	3.67696	4.86415	5.51543	3.18434	4.31161	2.25167	4.86415	5.51543	2.90689	4.68722	3.9	2.25167	3.9	3.18434	4.31161	3.18434	2.25167
2.6	2.6	2.6	3.67696	5.2	5.66657	3.67696	2.90689	4.31161	4.68722	5.81378	2.6	4.11096	4.50333	2.6	4.31161	2.90689	4.11096	2.6	2.90689
2.6	2.6	2.90689	3.67696	4.86415	5.51543	1.3	4.31161	2.25167	5.36004	5.95735	2.25167	1.3	4.11096	2.25167	4.50333	2.6	4.68722	3.18434	2.6
2.90689	2.6	2.6	3.18434	4.68722	5.81378	5.66657	2.6	4.11096	4.50333	6.36867	2.90689	1.3	4.50333	2.6	4.50333	3.18434	4.31161	2.6	4.68722
2.6	2.6	3.18434	3.67696	4.86415	5.36004	4.86415	4.86415	2.25167	4.86415	6.36867	2.25167	1.3	4.68722	2.25167	4.68722	3.18434	4.68722	3.67696	4.68722
2.6	2.6	2.6	3.67696	4.86415	5.81378	3.9	3.18434	4.50333	4.68722	6.36867	2.90689	1.3	4.11096	2.6	3.9	3.67696	4.31161	2.6	2.6
2.6	2.6	2.6	3.18434	4.86415	5.81378	1.3	3.9	2.25167	4.86415	2.6	2.90689	1.3	4.68722	2.25167	4.68722	2.90689	4.86415	2.6	2.25167
2.6	2.6	2.6	3.67696	4.68722	5.36004	2.6	3.67696	4.31161	4.68722	2.6	1.83848	1.3	4.68722	2.6	4.31161	3.67696	4.68722	2.25167	1.83848
2.90689	2.6	2.90689	3.67696	4.86415	5.51543	1.3	3.9	2.25167	4.86415	2.90689	2.90689	1.3	4.68722	2.25167	4.31161	2.6	4.68722	3.18434	1.83848
2.6	2.6	2.6	3.67696	4.86415	5.66657	1.3	2.90689	4.31161	4.86415	2.90689	1.83848	1.3	4.86415	2.6	4.68722	3.67696	4.68722	2.6	2.6
2.6	2.90689	2.6	3.67696	5.2	5.36004	2.6	3.9	2.25167	4.86415	2.6	2.90689	1.3	4.68722	2.25167	4.31161	3.67696	4.86415	2.90689	2.90689
2.6	1.3	2.6	3.67696	4.86415	5.51543	2.6	2.6	1.83848	4.50333	2.6	2.6	1.3	4.11096	2.6	4.68722	2.90689	4.31161	2.6	2.6
2.6	1.83848	2.6	3.67696	5.36004	5.36004	2.90689	4.11096	4.50333	4.86415	3.9	1.83848	1.3	4.86415	2.25167	3.67696	2.90689	5.2	2.90689	2.6
2.6	1.83848	2.6	3.18434	3.9	5.36004	2.6	2.90689	2.25167	4.50333	5.66657	2.90689	1.83848	4.31161	3.67696	4.68722	3.18434	4.31161	2.6	4.86415
2.6	2.25167	2.6	3.9	5.2	5.36004	5.51543	4.31161	4.31161	4.86415	5.95735	2.90689	2.6	4.11096	2.25167	4.11096	2.90689	4.68722	2.6	4.31161
2.6	2.6	2.6	3.67696	3.9	5.2	2.90689	2.6	2.25167	4.50333	6.09754	2.25167	2.6	4.86415	3.67696	4.68722	2.6	4.31161	2.6	2.25167
2.6	2.6	2.6	3.9	3.9	5.36004	1.83848	4.86415	1.83848	4.86415	6.09754	2.6	2.90689	4.68722	2.6	4.11096	3.67696	4.68722	3.18434	1.83848
2.6	2.6	2.6	3.18434	3.9	5.36004	1.3	2.90689	3.9	4.86415	6.09754	2.6	4.68722	4.11096	3.67696	4.68722	2.6	4.68722	2.6	1.3
2.6	2.6	2.6	3.9	4.11096	5.36004	1.3	5.2	2.25167	4.86415	6.36867	1.83848	4.50333	4.68722	2.25167	4.50333	3.18434	4.86415	2.6	1.3
2.6	2.6	2.6	3.67696	4.68722	5.51543	1.3	2.90689	4.11096	4.86415	5.51543	2.90689	3.9	4.68722	3.67696	4.86415	3.67696	4.68722	2.6	2.90689
2.6	2.6	2.6	3.9	5.2	5.36004	2.6	4.31161	2.90689	5.36004	3.67696	2.25167	4.11096	4.11096	2.25167	3.9	3.67696	4.68722	3.18434	2.6
2.6	2.6	2.6	4.31161	5.36004	5.36004	2.90689	2.6	4.50333	4.86415	5.66657	2.90689	4.31161	4.68722	2.6	4.68722	3.67696	4.68722	2.6	2.6
2.6	1.3	2.6	4.31161	5.2	5.36004	2.90689	4.68722	3.18434	4.86415	5.95735	2.90689	3.9	4.86415	2.90689	4.50333	3.67696	4.68722	2.90689	4.86415
2.6	1.83848	2.6	4.50333	5.2	5.2	5.66657	2.90689	3.67696	5.36004	3.67696	2.25167	3.67696	4.31161	2.6	4.68722	3.9	4.68722	2.6	4.86415
2.6	1.83848	2.6	4.31161	4.86415	5.36004	2.90689	4.68722	3.18434	4.86415	4.86415	2.90689	4.31161	4.86415	2.25167	4.68722	3.18434	4.86415	2.6	2.6
2.6	2.25167	2.6	4.31161	5.2	4.86415	2.90689	2.6	4.50333	4.68722	5.36004	2.90689	3.9	5.2	2.6	4.68722	3.67696	5.2	2.6	2.25167
2.6	2.6	2.6	4.50333	5.2	5.36004	1.83848	3.9	3.18434	5.36004	5.36004	1.83848	2.90689	4.31161	2.25167	4.68722	3.67696	4.31161	2.6	1.83848
2.25167	2.6	2.6	4.50333	4.86415	4.86415	1.83848	2.90689	3.9	4.86415	5.51543	2.90689	4.31161	5.2	2.6	4.31161	3.18434	5.36004	2.6	1.3
2.6	2.6	2.6	4.31161	3.9	4.11096	4.86415	4.11096	3.18434	4.68722	5.51543	3.18434	3.9	5.2	2.6	4.86415	3.9	4.68722	2.90689	1.3
2.6	2.90689	2.6	4.68722	4.31161	5.36004	2.90689	2.90689	4.31161	4.68722	3.67696	2.6	2.90689	4.31161	2.6	4.68722	2.6	4.68722	2.6	2.6
2.6	1.83848	2.90689	4.68722	4.86415	5.36004	2.25167	4.11096	2.90689	4.86415	4.68722	2.90689	3.9	4.11096	2.25167	4.68722	3.67696	4.68722	2.90689	2.90689
2.25167	1.3	2.6	4.86415	4.86415	4.68722	5.36004	3.18434	4.31161	4.50333	4.31161	2.90689	3.67696	3.9	2.6	4.68722	2.90689	4.86415	2.6	2.6
1.83848	1.83848	2.90689	4.31161	4.86415	5.36004	1.83848	4.11096	2.25167	5.36004	5.2	2.6	4.11096	5.2	2.25167	4.11096	3.9	4.86415	2.90689	2.6
1.83848	1.83848	2.25167	4.86415	5.36004	5.2	4.86415	2.90689	4.50333	4.50333	4.86415	2.90689	3.18434	4.68722	2.6	4.68722	2.90689	5.2	2.6	2.6
1.83848	1.83848	2.6	4.86415	5.36004	5.36004	1.83848	4.11096	2.25167	4.86415	3.67696	2.25167	3.67696	4.11096	2.6	3.9	3.67696	4.68722	2.6	4.86415
2.6	2.6	2.6	4.11096	5.51543	5.36004	5.36004	2.6	3.67696	4.31161	3.9	2.6	4.31161	5.2	2.6	4.68722	2.6	4.86415	2.90689	4.68722
2.6	2.6	2.6	4.86415	5.36004	4.68722	4.86415	4.31161	2.25167	4.50333	3.9	2.90689	3.9	4.86415	2.25167	4.31161	2.90689	4.68722	2.6	2.6
2.6	2.6	2.6	4.86415	5.2	5.36004	4.68722	3.18434	3.9	4.50333	3.9	2.25167	3.67696	4.68722	2.6	4.68722	3.18434	4.68722	2.6	2.6
2.6	2.6	2.90689	5.36004	4.86415	4.86415	4.86415	4.11096	2.25167	4.86415	4.11096	2.90689	4.68722	4.11096	2.25167	4.68722	2.90689	5.36004	2.90689	2.6
2.25167	2.6	2.25167	4.31161	5.2	4.68722	4.50333	2.90689	4.31161	4.50333	4.68722	2.90689	4.11096	4.68722	2.6	4.68722	2.90689	5.36004	2.6	2.6
1.83848	2.6	2.90689	5.51543	5.36004	5.36004	4.86415	3.9	2.25167	4.50333	4.31161	1.83848	3.9	4.68722	2.25167	4.31161	2.90689	4.68722	2.90689	2.6
2.6	2.6	2.25167	4.86415	5.36004	5.36004	4.31161	2.6	4.11096	4.50333	4.68722	2.90689	4.11096	4.86415	2.6	4.31161	2.90689	4.68722	2.6	2.6
2.6	2.6	2.6	4.86415	5.36004	4.31161	4.68722	4.11096	2.90689	4.50333	4.11096	2.6	4.11096	4.68722	2.25167	4.68722	3.18434	5.2	2.6	2.6
2.6	2.25167	2.6	5.51543	5.95735	5.36004	4.31161	2.90689	3.9	4.50333	3.9	2.6	4.68722	3.9	2.6	4.50333	3.67696	5.36004	2.6	2.90689
2.6	1.3	2.6	5.2	5.66657	5.51543	4.68722	4.11096	2.90689	4.50333	3.9	2.90689	4.50333	4.86415	2.25167	4.68722	2.90689	5.36004	2.6	2.6
2.25167	1.3	2.6	5.36004	6.09754	5.36004	4.68722	2.6	3.67696	4.50333	4.11096	2.6	4.86415	4.68722	2.90689	4.68722	2.6	5.36004	2.6	4.31161
1.83848	1.83848	2.6	5.51543	5.81378	4.31161	4.86415	3.9	2.90689	4.50333	3.9	1.83848	4.31161	5.2	1.83848	4.68722	3.67696	4.68722	2.6	4.68722
2.25167	2.25167	2.6	5.36004	5.95735	4.68722	4.86415	3.18434	2.25167	4.31161	4.31161	2.90689	4.86415	4.68722	2.90689	4.68722	2.6	4.86415	2.6	4.68722
2.6	2.6	2.6	4.68722	5.51543	5.36004	4.68722	4.11096	3.9	4.50333	4.68722	2.25167	4.86415	4.11096	2.25167	4.68722	2.90689	5.2	3.18434	4.68722
2.25167	2.6	2.6	4.68722	5.95735	5.36004	3.9	2.90689	2.25167	4.31161	4.31161	2.90689	4.31161	5.2	3.67696	4.31161	3.18434	5.2	2.6	4.68722
1.83848	2.25167	2.6	4.86415	6.36867	4.68722	3.9	3.67696	4.31161	4.50333	4.68722	2.6	4.86415	5.2	2.25167	4.86415	2.90689	4.86415	2.90689	4.68722
1.3	1.3	2.6	4.86415	5.81378	4.86415	3.9	2.6	2.25167	4.50333	4.31161	2.25167	4.68722	5.2	3.67696	4.68722	2.90689	5.36004	2.6	4.68722
2.25167	1.3	2.6	5.2	6.36867	4.86415	3.9	3.9	4.31161	4.50333	3.9	2.90689	4.31161	4.86415	2.25167	3.9	2.6	4.68722	3.18434	4.68722
2.6	1.3	2.6	4.68722	5.95735	4.86415	3.9	2.90689	2.25167	4.31161	3.9	2.6	4.31161	4.31161	3.67696	4.68722	3.18434	5.36004	2.6	4.68722
1.83848	1.3	2.25167	4.11096	6.09754	4.68722	3.9	4.11096	3.9	4.31161	4.11096	1.83848	4.11096	4.11096	2.25167	4.86415	2.90689	4.31161	3.67696	4.68722
1.83848	1.83848	2.6	4.86415	6.62873	5.36004	3.9	2.6	2.25167	4.50333	4.31161	2.90689	3.9	5.2	3.67696	4.86415	3.18434	5.36004	2.6	4.68722
2.6	2.25167	2.6	4.68722	6.09754	4.68722	4.11096	3.9	3.67696	4.86415	4.86415	2.25167	3.9	5.2	2.25167	4.68722	2.6	5.2	2.90689	4.68722
2.6	2.25167	2.6	4.68722	6.62873	5.36004	4.31161	2.90689	1.83848	4.68722	4.31161	2.6	4.11096	4.86415	3.67696	4.86415	3.67696	5.36004	2.6	4.68722
2.25167	2.25167	2.6	4.86415	6.62873	4.31161	4.68722	4.11096	4.50333	4.50333	4.68722	1.83848	3.67696	4.68722	2.25167	4.68722	2.6	5.36004	3.18434	4.68722
1.83848	1.83848	2.90689	4.68722	7.00071	4.86415	4.31161	2.6	2.25167	4.86415	4.31161	2.90689	3.67696	4.11096	3.67696	4.31161	2.6	5.36004	2.6	4.68722
1.83848	1.3	2.6	5.2	7.00071	4.86415	3.9	4.31161	4.50333	4.31161	5.36004	2.90689	4.11096	4.68722	2.25167	4.68722	3.18434	5.36004	2.90689	4.31161
1.83848	2.90689	2.6	4.68722	7.00071	4.31161	4.11096	2.90689	2.25167	5.2	3.9	2.25167	4.31161	3.9	2.6	4.31161	2.25167	5.2	2.6	4.31161
2.6	1.3	2.6	4.11096	7.46793	4.68722	3.9	4.11096	3.9	4.86415	3.9	2.6	3.67696	4.86415	2.25167	4.86415	1.83848	5.36004	2.6	4.68722
2.6	1.3	2.6	4.68722	7.12039	4.86415	4.50333	2.6	2.25167	5.2	3.9	2.90689	3.9	4.68722	2.6	4.11096	3.18434	5.51543	2.90689	4.31161
2.25167	1.3	2.25167	4.68722	7.12039	4.68722	4.50333	4.11096	3.9	4.50333	3.9	1.83848	4.11096	4.86415	2.6	4.68722	2.25167	5.36004	2.90689	4.68722
2.6	1.3	2.6	4.68722	7.12039	4.86415	4.31161	2.90689	2.25167	5.2	3.9	2.90689	4.31161	4.68722	2.6	4.86415	3.9	5.51543	2.6	4.68722
2.25167	1.3	2.25167	5.2	7.00071	4.86415	4.11096	4.11096	3.9	4.68722	3.9	2.25167	3.67696	4.11096	2.6	4.31161	2.25167	5.36004	2.6	4.68722
1.83848	1.3	2.90689	4.68722	7.46793	4.86415	3.9	2.90689	2.25167	5.2	4.11096	1.83848	3.9	3.9	2.6	4.86415	2.90689	5.36004	2.6	4.68722
2.6	1.3	2.6	4.11096	7.58024	4.68722	4.11096	4.11096	3.67696	4.68722	4.11096	2.90689	4.11096	4.86415	2.6	4.68722	2.25167	5.36004	2.90689	4.68722
2.25167	1.3	2.6	4.31161	7.46793	5.36004	4.11096	2.6	2.90689	5.51543	4.31161	1.83848	4.11096	5.2	2.6	4.68722	2.90689	5.36004	2.6	4.68722
2.6	1.3	2.6	4.86415	7.8	4.68722	3.18434	4.31161	3.9	4.31161	4.68722	2.6	3.9	5.2	2.6	5.36004	2.25167	4.86415	2.90689	4.68722
2.25167	1.3	2.6	4.86415	8.01374	4.86415	4.11096	2.90689	2.90689	5.95735	4.68722	2.6	4.11096	4.86415	2.6	4.86415	2.90689	5.36004	2.6	4.68722
2.6	1.3	2.6	4.86415	7.6909	4.68722	3.9	4.11096	3.9	4.86415	4.11096	2.6	4.31161	4.31161	2.6	4.86415	1.83848	5.36004	2.6	4.68722
2.25167	1.3	2.6	4.11096	7.90759	4.86415	3.9	2.90689	2.90689	5.66657	3.9	1.83848	4.11096	4.11096	2.6	4.68722	3.18434	5.51543	2.6	4.68722
1.83848	1.3	2.6	4.11096	8.01374	4.68722	3.9	4.31161	3.9	4.50333	5.36004	2.25167	3.9	4.11096	2.90689	5.2	1.3	5.51543	2.6	4.68722
1.83848	2.90689	2.90689	4.68722	7.58024	5.36004	3.9	2.90689	2.90689	5.36004	4.86415	2.90689	4.31161	5.2	2.6	4.86415	3.18434	5.36004	2.6	4.68722
2.25167	1.3	2.6	4.68722	8.32406	4.68722	3.67696	4.11096	4.31161	4.50333	4.50333	1.83848	3.9	4.68722	2.6	5.2	1.3	5.51543	2.90689	4.68722
2.6	1.3	2.6	5.2	7.8	5.36004	3.18434	2.6	2.90689	4.86415	4.86415	2.6	3.9	4.86415	2.6	4.86415	1.83848	5.36004	2.6	4.68722
2.25167	1.3	2.6	4.11096	8.01374	5.2	2.90689	4.11096	4.50333	4.50333	4.86415	2.90689	3.9	4.68722	2.6	4.68722	3.67696	5.51543	2.90689	4.68722
2.25167	1.83848	2.6	4.31161	8.01374	4.31161	3.18434	2.90689	2.90689	5.36004	4.86415	2.25167	3.9	4.31161	2.90689	5.36004	2.25167	4.86415	2.90689	4.68722
1.83848	1.3	2.6	4.31161	7.58024	4.86415	2.90689	4.31161	3.9	3.9	4.68722	2.90689	3.67696	4.31161	2.90689	4.68722	2.90689	5.51543	2.90689	4.68722
2.6	3.18434	2.6	4.86415	8.01374	5.36004	3.18434	2.6	2.90689	4.68722	4.31161	2.25167	3.67696	4.11096	2.90689	4.86415	1.83848	5.36004	2.6	4.68722
2.6	1.3	2.90689	4.68722	7.46793	4.68722	1.83848	3.9	4.31161	3.67696	4.86415	2.6	3.67696	4.68722	2.90689	5.36004	2.90689	5.51543	2.90689	4.68722
2.25167	1.3	2.90689	4.68722	7.6909	4.86415	1.3	2.90689	2.25167	4.50333	4.86415	2.90689	3.67696	4.86415	2.90689	5.2	1.3	5.36004	2.6	4.68722
1.83848	1.3	2.25167	4.68722	7.46793	4.68722	2.90689	4.11096	4.50333	3.67696	4.68722	1.83848	3.9	4.86415	2.90689	4.86415	1.83848	5.51543	2.6	4.68722
1.83848	1.3	2.6	4.86415	8.01374	4.86415	1.3	2.6	2.6	4.31161	4.50333	2.6	3.9	4.68722	2.6	4.86415	2.90689	5.36004	2.6	4.68722
1.3	1.3	2.6	4.86415	7.58024	5.36004	3.9	4.31161	4.50333	3.9	4.68722	2.90689	3.67696	4.86415	2.90689	4.68722	1.3	5.36004	2.6	4.68722
2.25167	2.90689	2.6	4.86415	7.12039	4.31161	3.67696	2.90689	2.90689	3.67696	3.9	2.25167	3.67696	4.68722	2.90689	5.2	3.18434	4.68722	2.6	4.68722
1.83848	2.90689	2.6	5.2	7.35391	5.36004	1.3	4.11096	4.31161	3.67696	4.31161	2.6	3.67696	4.31161	2.90689	5.36004	1.3	5.36004	2.90689	4.68722
1.83848	3.18434	2.90689	4.86415	7.46793	4.68722	3.67696	2.6	2.90689	3.67696	3.9	2.25167	3.67696	4.11096	2.90689	5.2	2.90689	5.36004	2.6	4.68722
1.3	3.18434	2.6	5.2	7.46793	4.86415	1.3	4.31161	3.9	3.9	4.31161	1.83848	3.9	3.9	2.6	5.36004	1.3	5.36004	2.90689	4.68722
1.3	3.18434	2.90689	4.31161	7.90759	4.68722	1.3	2.90689	2.90689	3.67696	3.67696	2.25167	3.67696	5.2	3.67696	4.68722	1.3	5.36004	2.6	4.68722
2.25167	3.18434	2.6	4.68722	7.6909	5.36004	3.67696	3.9	3.9	4.11096	4.31161	2.25167	3.67696	4.86415	3.18434	5.36004	3.18434	5.36004	2.25167	4.68722
2.25167	3.18434	2.90689	4.68722	7.8	4.68722	1.3	2.6	2.90689	3.67696	3.67696	2.90689	3.18434	4.86415	3.18434	4.86415	1.3	5.36004	2.90689	4.68722
1.83848	2.90689	2.25167	4.86415	7.58024	4.86415	4.31161	4.11096	4.31161	3.9	3.9	1.83848	3.67696	4.86415	2.90689	5.2	2.90689	5.51543	2.90689	4.68722
1.83848	3.18434	2.6	4.68722	7.8	4.86415	1.3	2.90689	3.18434	3.67696	3.67696	1.83848	3.67696	4.31161	2.90689	5.51543	1.3	4.86415	2.6	4.68722
2.25167	3.18434	2.25167	4.86415	7.8	4.68722	4.50333	3.67696	4.50333	3.67696	4.31161	2.90689	3.67696	4.11096	2.6	5.36004	1.3	5.51543	2.25167	4.68722
1.83848	3.18434	2.6	4.31161	8.01374	5.36004	1.3	2.6	2.90689	3.67696	3.9	2.6	3.18434	3.9	2.90689	5.36004	3.18434	5.51543	2.6	4.68722
2.25167	2.90689	2.6	4.68722	8.32406	4.86415	4.68722	4.11096	4.11096	3.67696	4.11096	2.6	3.9	5.2	2.90689	5.36004	3.18434	5.36004	2.6	4.68722
2.25167	2.90689	2.90689	4.68722	7.6909	5.36004	4.31161	2.6	2.90689	4.31161	3.67696	2.90689	3.67696	5.2	2.90689	4.31161	2.90689	5.51543	2.6	5.36004
1.83848	2.90689	2.6	4.31161	8.01374	4.68722	4.68722	4.11096	2.90689	3.9	4.11096	2.6	3.67696	4.86415	2.90689	5.81378	3.18434	5.51543	2.6	5.36004
1.83848	2.90689	2.6	4.86415	7.6909	5.36004	4.31161	2.6	3.9	4.31161	3.67696	2.25167	3.18434	5.2	2.90689	5.66657	3.18434	5.51543	2.6	4.86415
2.25167	2.90689	2.6	4.86415	7.90759	5.36004	4.11096	4.11096	2.90689	4.11096	4.11096	2.90689	3.67696	4.86415	2.6	5.36004	2.90689	5.51543	2.90689	5.36004
2.6	2.90689	2.6	4.86415	7.6909	4.31161	4.11096	2.90689	4.31161	3.67696	3.67696	2.6	3.18434	4.31161	2.6	5.2	2.90689	5.51543	2.90689	5.36004
2.25167	1.3	2.6	4.68722	7.12039	5.36004	3.67696	4.31161	2.90689	3.67696	3.67696	2.6	3.18434	4.31161	3.18434	5.36004	2.90689	5.51543	2.90689	5.36004
2.25167	1.3	2.6	4.68722	8.01374	4.86415	3.67696	2.6	4.68722	4.31161	4.11096	2.90689	3.67696	4.11096	2.6	5.81378	2.90689	5.51543	2.6	5.36004
1.83848	1.3	2.6	4.86415	7.58024	5.36004	4.11096	4.11096	2.90689	3.9	3.9	1.83848	3.67696	5.2	2.90689	5.36004	2.90689	5.51543	2.90689	5.36004
1.83848	1.3	2.90689	4.68722	8.22192	5.51543	4.31161	2.90689	4.68722	3.9	3.67696	2.90689	3.18434	5.2	2.90689	5.66657	2.90689	5.51543	2.6	5.36004
1.3	2.90689	2.6	5.2	7.90759	5.51543	4.68722	4.31161	2.90689	3.67696	4.11096	2.6	3.67696	5.2	2.6	4.86415	2.90689	5.81378	2.6	5.36004
2.25167	2.90689	2.6	4.68722	8.62322	5.81378	4.11096	2.90689	4.86415	3.18434	3.9	2.25167	3.67696	5.2	2.90689	5.66657	2.90689	5.36004	2.6	5.2
2.6	1.3	2.6	4.68722	8.22192	5.51543	4.11096	4.11096	3.18434	3.9	4.11096	2.90689	3.67696	4.86415	3.18434	5.51543	2.6	5.81378	2.6	5.36004
2.25167	1.3	2.6	4.68722	9.1	5.36004	4.11096	2.90689	5.36004	3.67696	3.67696	1.83848	3.67696	5.36004	2.90689	5.66657	2.6	5.36004	2.6	5.36004
2.25167	1.3	2.6	4.86415	8.62322	6.36867	4.11096	4.31161	3.18434	3.67696	3.9	2.90689	3.67696	4.86415	2.90689	5.36004	2.90689	5.81378	2.6	4.86415
1.83848	1.3	2.90689	4.68722	9.1	5.95735	4.11096	2.90689	4.86415	3.18434	4.11096	2.6	3.18434	4.68722	2.6	5.36004	2.90689	5.36004	2.6	5.36004
2.6	1.3	2.6	4.86415	8.81703	5.95735	4.31161	4.11096	2.90689	3.9	3.9	2.25167	3.18434	4.31161	2.6	5.81378	2.6	5.81378	2.6	5.36004
2.25167	1.3	2.90689	4.68722	9.19239	5.95735	4.11096	3.18434	4.86415	3.67696	3.9	2.90689	3.18434	5.36004	2.6	4.86415	2.90689	5.81378	2.6	5.2
2.25167	2.90689	2.6	4.86415	8.81703	6.36867	4.11096	4.11096	3.18434	3.9	3.9	1.83848	2.90689	5.2	2.90689	5.95735	2.90689	6.36867	2.90689	5.36004
1.83848	1.3	2.90689	4.86415	9.46414	5.66657	4.11096	2.90689	4.86415	3.18434	3.67696	2.90689	3.67696	5.2	2.6	5.51543	2.6	6.36867	2.6	5.36004
2.25167	1.3	2.6	4.68722	8.72067	5.95735	4.11096	4.31161	3.18434	3.9	3.67696	2.25167	3.18434	5.2	2.90689	5.51543	2.90689	5.51543	2.90689	5.36004
1.83848	1.83848	2.6	5.36004	9.1	5.66657	4.68722	2.6	4.50333	3.9	3.9	2.6	3.67696	4.86415	2.6	5.95735	2.90689	6.36867	2.6	5.51543
2.6	1.83848	2.6	4.31161	9.19239	5.36004	4.68722	4.31161	3.18434	3.67696	3.67696	2.90689	3.18434	5.2	2.6	5.81378	3.18434	6.36867	2.6	5.36004
2.6	1.3	2.6	4.86415	9.72831	5.81378	4.68722	2.90689	4.50333	3.9	4.11096	1.83848	3.67696	4.86415	2.6	6.09754	2.90689	6.5	2.6	5.51543
2.25167	1.3	2.6	5.2	9.46414	5.36004	4.68722	3.9	3.18434	3.9	3.67696	2.6	2.90689	4.31161	2.6	5.51543	3.18434	7.00071	2.6	5.36004
1.83848	1.3	3.18434	4.86415	9.98549	5.66657	4.68722	2.6	4.50333	3.67696	3.9	2.25167	2.90689	5.36004	2.6	5.51543	2.90689	6.5	2.6	5.51543
2.25167	1.3	2.6	5.36004	9.81478	5.81378	4.68722	4.31161	2.90689	3.9	3.9	2.6	2.90689	5.2	2.90689	6.36867	3.18434	7.00071	2.6	5.51543
1.83848	2.90689	2.90689	5.36004	10.1533	5.36004	4.68722	2.90689	4.86415	3.67696	3.9	2.25167	3.18434	5.2	2.90689	5.36004	2.6	6.5	2.6	5.36004
1.83848	2.6	2.6	5.36004	9.72831	5.2	4.68722	4.50333	2.90689	3.67696	4.11096	1.83848	2.90689	5.2	2.90689	5.81378	2.90689	7.00071	2.90689	5.81378
1.3	2.25167	2.6	4.86415	10.2362	5.81378	4.68722	2.6	5.2	3.18434	3.67696	2.6	3.67696	5.81378	2.90689	5.81378	2.90689	5.95735	2.6	4.86415
1.83848	2.25167	2.6	5.36004	10.2362	5.51543	4.68722	4.11096	2.90689	3.67696	3.9	2.25167	3.18434	5.81378	3.18434	5.51543	2.90689	6.755	3.18434	5.36004
1.83848	1.83848	2.90689	5.51543	9.81478	5.81378	4.68722	2.90689	4.86415	3.67696	3.67696	2.6	3.67696	5.51543	2.90689	6.36867	2.90689	6.36867	2.6	5.51543
2.25167	1.83848	2.6	5.66657	9.55301	5.36004	4.68722	4.31161	2.90689	3.67696	3.67696	2.6	3.67696	5.36004	2.90689	5.95735	2.90689	6.755	2.90689	5.81378
1.83848	1.83848	2.90689	5.51543	10.2362	5.81378	4.68722	2.90689	5.36004	2.90689	3.9	1.83848	3.18434	5.2	2.6	5.95735	2.25167	6.5	2.6	5.36004
1.83848	1.3	2.6	5.36004	11.0309	5.81378	4.68722	4.31161	2.90689	3.67696	4.11096	2.6	3.67696	5.2	3.18434	6.62873	2.90689	6.5	2.90689	5.36004
2.25167	1.3	2.90689	5.36004	10.641	5.36004	4.68722	2.6	5.36004	3.67696	3.67696	2.6	3.67696	5.2	2.6	5.95735	2.90689	6.62873	2.6	5.51543
2.25167	1.3	2.25167	5.36004	11.4075	5.81378	4.86415	4.11096	2.90689	2.90689	4.11096	2.25167	2.90689	6.36867	3.67696	6.62873	1.83848	6.62873	2.90689	5.36004
2.25167	1.3	2.90689	5.81378	11.4075	5.95735	5.2	2.90689	5.36004	3.67696	3.67696	1.83848	2.90689	6.36867	2.6	6.62873	2.90689	6.62873	2.6	5.81378
1.83848	2.90689	2.25167	5.81378	11.8436	5.81378	5.2	4.68722	3.18434	3.18434	3.9	2.6	3.18434	5.95735	3.18434	6.755	2.25167	6.755	2.90689	5.2
1.83848	2.6	2.6	5.2	11.772	6.09754	4.68722	2.6	4.68722	3.67696	4.11096	2.25167	3.18434	5.81378	2.6	7.12039	1.83848	6.755	2.90689	5.95735
1.3	2.6	2.6	5.36004	11.772	5.66657	4.11096	4.68722	3.18434	2.90689	3.9	1.83848	3.67696	5.51543	2.90689	7.00071	2.90689	6.62873	2.90689	5.51543
1.83848	2.6	2.6	5.66657	11.772	6.36867	4.68722	2.90689	5.36004	3.67696	3.67696	2.6	3.67696	5.36004	2.6	7.12039	2.6	6.36867	2.6	5.95735
1.83848	1.83848	2.6	5.66657	11.8436	6.36867	4.68722	4.68722	3.18434	2.90689	3.9	2.6	3.18434	6.5	2.6	7.00071	2.90689	6.5	2.90689	6.5
1.3	1.3	3.18434	5.2	12.604	5.81378	4.68722	2.6	5.36004	3.18434	3.9	2.6	3.67696	6.36867	2.6	7.00071	2.6	6.5	3.18434	6.36867
1.83848	1.3	2.6	5.66657	12.2642	6.62873	4.31161	4.31161	3.18434	2.90689	3.9	2.25167	3.67696	6.5	2.90689	7.00071	2.90689	6.5	2.6	6.5
1.83848	2.90689	2.90689	5.36004	12.7373	6.36867	4.68722	3.18434	4.68722	3.18434	3.18434	2.25167	2.90689	6.36867	2.6	6.62873	2.6	6.755	3.67696	6.36867
1.83848	2.90689	2.6	4.31161	13.1294	5.95735	4.68722	4.68722	2.90689	3.67696	4.11096	2.6	3.67696	5.95735	3.67696	6.62873	2.6	5.81378	2.90689	6.5
1.3	2.25167	2.90689	5.66657	12.9348	6.36867	4.68722	2.90689	4.50333	2.90689	4.11096	2.25167	2.6	5.51543	2.6	7.46793	2.25167	6.5	2.6	6.36867
1.3	1.83848	2.6	5.36004	12.8693	6.36867	5.36004	4.11096	2.90689	3.18434	3.9	2.6	2.6	5.36004	3.18434	7.12039	1.83848	6.5	2.90689	7.00071
	1.83848	2.6	5.66657	13.3843	6.36867	5.51543	2.6	2.90689	2.6	3.67696	1.83848	2.6	5.2	2.6	7.00071	2.25167	5.95735	2.90689	6.755
	3.18434	2.6	5.36004	13.2575	6.36867	5.51543	4.31161	4.50333	2.6	3.9	1.83848	2.90689	6.5	3.67696	7.00071	1.83848	7.00071	2.90689	6.62873
	2.6	2.90689	5.36004	13.6345	5.81378	5.81378	2.90689	2.90689	3.18434	3.67696	2.6	2.90689	6.5	2.6	7.00071	2.25167	6.5	2.6	7.00071
	2.6	2.6	5.36004	13.8192	6.62873	5.81378	4.68722	4.50333	3.18434	3.9	1.83848	3.18434	6.62873	3.9	7.35391	1.83848	6.755	2.90689	6.5
	2.6	2.6	5.51543	13.8192	6.36867	5.51543	2.6	2.90689	3.18434	3.9	2.6	3.18434	5.95735	2.90689	7.46793	2.25167	6.755	2.6	6.62873
	2.6	2.6	5.36004	13.8192	5.95735	5.36004	3.9	4.31161	3.67696	3.67696	1.83848	3.18434	5.51543	3.18434	7.00071	1.83848	7.12039	2.90689	7.00071
	2.25167	3.18434	5.95735	13.8192	6.36867	5.2	2.90689	2.90689	2.90689	3.9	1.83848	3.67696	6.62873	2.90689	7.46793	1.83848	7.00071	2.6	6.5
	1.83848	2.25167	5.36004	14.0616	6.36867	5.36004	3.9	4.50333	3.18434	4.11096	2.6	3.18434	6.5	3.67696	7.00071	1.83848	7.12039	2.6	6.62873
	2.90689	2.90689	5.36004	13.2575	6.36867	5.51543	2.90689	2.25167	2.90689	3.9	1.83848	3.67696	6.5	2.6	7.46793	1.83848	7.00071	2.6	6.755
	2.90689	1.83848	5.51543	13.8192	6.5	5.36004	4.31161	4.31161	2.90689	3.9	1.3	3.67696	6.5	3.9	7.6909	1.83848	7.00071	2.90689	6.5
	2.6	2.6	5.66657	12.8035	6.62873	5.2	2.6	2.25167	2.90689	2.90689	2.6	3.18434	6.36867	2.6	7.6909	1.83848	7.00071	2.90689	6.62873
	2.6	2.25167	5.66657	13.6345	6.5	5.36004	4.31161	4.50333	2.6	3.67696	1.83848	3.67696	7.00071	3.18434	7.90759	1.83848	7.35391	2.90689	6.36867
	2.6	2.6	5.95735	12.604	6.36867	5.51543	2.90689	2.90689	2.90689	3.9	2.6	3.67696	6.62873	2.6	8.01374	1.83848	7.58024	2.6	6.5
	2.6	2.6	5.36004	13.4473	6.5	5.95735	3.18434	4.31161	3.18434	3.9	1.83848	2.6	6.5	3.67696	7.00071	1.83848	7.58024	2.6	6.62873
	1.83848	2.90689	5.95735	12.4012	6.755	5.51543	2.6	2.90689	3.18434	4.11096	2.25167	3.67696	6.5	2.6	7.46793	1.83848	7.46793	2.6	6.5
	2.90689	2.6	5.36004	13.1294	6.36867	5.2	3.67696	4.31161	2.90689	4.11096	1.83848	2.6	6.5	3.67696	8.22192	1.83848	7.58024	2.90689	6.5
	2.90689	2.90689	5.66657		6.62873	4.68722	2.6	2.90689	3.18434	3.9	2.25167	3.18434	5.95735	2.6	8.01374	1.83848	7.46793	2.6	6.62873
	2.6	2.25167	5.51543		6.62873	4.68722	2.90689	4.31161	3.67696	3.67696	1.83848	2.6	6.755	3.9	7.00071	1.3	7.12039	2.6	6.36867
	2.6	2.6	5.95735		7.00071	4.68722	2.90689	2.90689	2.90689	3.9	1.83848	3.67696	6.62873	2.6	7.6909	1.83848	7.46793	2.6	6.755
	1.83848	1.83848	5.51543		6.5	4.68722	3.18434	4.50333	3.18434	3.9	1.83848	3.67696	6.5	2.90689	8.22192	1.3	7.58024	2.6	5.95735
	1.83848	2.6	5.95735		7.00071	4.31161	2.6	2.90689	2.90689	3.67696	2.25167	2.6	6.5	2.6	8.01374	1.83848	8.01374	2.90689	6.62873
	1.3	2.25167	6.36867		7.12039	4.11096	3.67696	4.50333	2.90689	3.9	2.25167	2.90689	7.8	2.90689	8.32406	1.83848	7.6909	3.18434	6.36867
	2.90689	2.90689	6.36867		6.5	5.2	2.90689	2.90689	2.90689	3.67696	1.83848	2.90689	7.6909	2.6	8.01374	1.83848	7.58024	2.6	6.36867
	2.90689	2.6	6.36867		7.00071	5.2	2.90689	4.50333	2.6	3.9	1.83848	2.90689	8.22192	3.67696	8.01374	1.83848	8.32406	2.90689	6.755
	2.6	2.90689	6.36867		6.5	5.2	2.90689	2.90689	2.90689	3.9	2.25167	2.90689	8.22192	3.18434	8.32406	1.83848	8.42496	2.6	6.36867
	2.6	2.6	6.36867		7.00071	4.86415	2.6	4.50333	2.90689	3.67696	1.3	2.90689	8.22192	3.67696	8.01374	1.83848	8.81703	2.6	7.00071
	2.6	2.6	6.36867		6.62873	4.68722	1.83848	2.90689	2.90689	3.67696	1.3	3.18434	7.90759	3.67696	8.62322	1.83848	8.62322	2.6	6.36867
	2.6	2.25167	5.51543		5.95735	4.68722	1.83848	4.68722	3.18434	3.9	2.90689	3.18434	7.8	3.67696	7.58024	1.83848	8.72067	2.6	7.00071
	2.90689	2.6	5.95735		7.00071	4.31161	3.18434	2.90689	2.90689	3.9	2.25167	2.90689	7.8	3.67696	8.32406	1.3	8.42496	2.6	6.5
	2.6	2.6	6.36867		6.36867	5.2	2.6	4.68722	2.90689	4.11096	1.83848	3.18434	7.8	3.67696	8.22192		9.00666	2.6	7.00071
	2.6	2.90689	7.00071		7.00071	5.2	2.90689	2.25167	2.90689	4.11096	2.25167	3.18434	7.90759	3.18434	8.22192		8.81703	2.6	6.755
	2.6	2.6	6.5		6.755	5.2	2.6	4.50333	2.6	3.67696	1.83848	2.6	8.22192	3.9	8.72067		8.32406	2.90689	7.46793
	2.6	2.90689	6.62873		6.36867	4.86415	3.67696	2.25167	2.25167	3.9	2.25167	2.6	8.32406	2.90689	7.6909		9.1	2.6	7.00071
	2.6	2.6	7.00071		7.00071	4.68722	2.90689	4.50333	2.90689	3.9	2.25167	3.67696	8.62322	3.9	8.52467		8.81703	2.6	6.755
	2.6	2.90689	7.00071		6.36867	4.68722	3.67696	1.83848	2.90689	4.11096	2.25167	3.18434	8.72067	2.90689	8.32406		9.19239	2.6	7.46793
	2.6	2.6	7.00071		7.58024	4.68722	2.6	4.50333	2.90689	3.9	2.25167	2.90689	8.81703	3.18434	8.01374		9.28386	2.6	7.46793
	2.6	2.6	6.36867		7.12039	5.2	3.67696	1.3	3.18434	2.90689	1.83848	2.90689	9.1	3.18434	8.72067		8.32406	2.6	7.46793
	2.25167	2.90689	6.62873		6.5	5.2	2.90689	4.50333	3.18434	3.67696	2.25167	2.6	9.19239	3.67696	8.32406		9.1	3.18434	7.6909
	2.25167	2.6	6.755		7.6909	5.36004	3.67696	1.83848	2.90689	3.9	1.83848	3.18434	8.32406	2.90689	8.01374		9.1	2.6	7.8
	1.83848	2.90689	7.12039		7.35391	4.31161	2.90689	4.50333	3.18434	3.9	2.25167	3.18434	8.62322	3.67696	8.72067		8.62322	2.90689	7.6909
	2.90689	2.6	6.5		7.12039	5.36004	2.90689	4.31161	2.90689	3.9	1.83848	2.6	8.81703	2.6	8.32406		8.81703	2.6	8.01374
	2.90689	2.6	6.5		7.46793	5.2	2.6	3.9	2.90689	3.9	1.83848	2.6	9.1	2.90689	8.42496		8.62322	2.6	7.58024
	2.6	2.90689	6.5		8.01374	5.2	3.67696	3.9	2.90689	3.9	1.3	2.6	9.1	2.6	8.01374		8.62322	2.6	8.32406
	2.6	2.6	6.62873		7.35391	4.68722	2.90689	3.67696	2.90689	3.18434	1.83848	2.6	9.1	3.9	8.32406		8.81703	2.6	8.01374
	2.6	2.6	7.6909		8.01374	4.68722	2.90689	3.9	3.18434	3.9	1.3	2.6	9.19239	2.6	8.32406		8.52467	2.6	8.32406
	2.6	2.90689	7.46793		8.01374	5.36004	2.90689	3.9	2.90689	2.90689	1.83848	2.6	9.28386	3.18434	7.6909		8.62322	3.18434	7.58024
	2.6	2.6	7.58024		8.22192	5.36004	2.90689	3.67696	2.90689	3.67696	1.83848	2.6	9.46414	2.6	8.72067		9.1	2.6	8.01374
	2.6	2.90689	7.46793		8.01374	5.36004	3.18434	3.9	3.67696	4.11096	1.3	2.6	9.55301	2.90689	8.01374		8.52467	2.90689	7.00071
	2.6	2.6	7.58024		7.12039	5.36004	2.90689	3.9	3.67696	3.9	1.83848	2.90689	9.81478	2.6	7.58024		9.46414	2.6	7.6909
	2.6	2.6	7.58024		8.32406	5.2	2.90689	3.9	3.67696	3.18434	1.3	2.90689	10.2362	3.67696	8.42496		8.81703	2.6	8.52467
	2.6	2.90689	7.6909		7.6909	5.2	2.90689	3.9	3.67696	3.9	1.3	3.18434	10.2362	2.6	7.46793		8.62322	2.6	8.22192
	2.6	2.6	7.46793		8.01374	5.81378	2.6	3.67696	2.90689	3.18434	1.83848	2.90689	9.72831	3.67696	8.32406		9.37443	2.6	8.01374
	2.6	2.6	8.01374		8.32406	5.66657	2.90689	3.9	3.18434	3.9	1.83848	3.18434	9.1	2.6	8.01374		8.32406	2.6	8.72067
	2.90689	2.6	7.46793		8.32406	5.51543	3.18434	3.67696	2.90689	3.9	1.83848	3.18434	9.1	2.90689	7.46793		9.28386	2.90689	8.32406
	2.90689	2.6	8.22192		7.58024	5.36004	2.90689	3.9	2.90689	3.67696	1.83848	3.18434	9.28386	2.6	8.42496		8.62322	2.6	8.72067
	2.6	2.90689	7.35391		8.72067	5.36004	2.90689	3.67696	2.90689	3.67696	1.3	3.67696	9.46414	2.90689	8.01374		9.1	2.6	8.32406
	2.6	2.90689	8.52467		8.42496	5.81378	3.18434	3.9	2.6	3.9	1.83848	2.90689	9.55301	2.6	8.62322		9.1	2.6	8.22192
	2.6	2.6	8.32406		8.01374	5.51543	2.6	3.9	2.90689	2.90689	1.83848	3.18434	9.81478	3.67696	8.32406		9.46414	2.6	8.72067
	2.6	2.6	8.32406		8.32406	5.2	2.6	3.67696	2.90689	3.9	1.3	3.67696	9.81478	2.6	8.42496		8.62322	2.6	9.19239
	2.90689	2.6	8.72067		8.32406	5.36004	3.18434	3.67696	2.90689	3.9	1.83848	2.6	8.81703	2.6	8.81703		8.81703	2.90689	8.62322
	2.6	2.6	8.22192		8.22192	6.36867	2.90689	3.9	2.90689	3.67696	1.3	2.6	9.1	2.6	8.72067		9.1	2.6	9.28386
	3.18434	2.6	8.72067		8.32406	6.5	2.90689	3.9	2.90689	3.9	1.83848	2.6	9.19239	3.67696	8.42496		8.72067	2.6	8.22192
	3.18434	2.6	8.32406		8.72067	6.5	2.6	3.67696	2.90689	2.90689	1.3	2.90689	9.28386	2.6	8.72067		8.62322	2.6	8.81703
	3.18434	2.90689	8.81703		8.22192	6.5	2.6	3.9	2.25167	3.67696	1.3	2.90689	8.32406	2.90689	8.72067		8.22192	2.90689	9.46414
	2.6	2.90689	8.72067		8.72067	6.36867	2.90689	4.31161		3.67696	1.3	2.90689	9.19239	2.6	9.1		8.62322	2.6	9.55301
	2.6	2.6	9.1		8.32406	5.95735	3.18434	4.11096		3.18434	1.3	3.18434	9.1	2.6	9.1		8.22192	2.90689	9.46414
	2.90689	2.90689	9.1		7.90759	5.81378	2.90689	4.11096		3.67696	1.3	2.6	9.1	2.6	8.72067		7.6909	2.6	9.81478
	2.90689	2.90689	9.1		8.72067	6.36867	2.6	3.67696		3.18434	1.3	3.18434	9.28386	2.6	8.81703		7.8	2.6	10.4809
	3.18434	2.6	8.72067		9.00666	6.5	3.18434	3.9		3.18434	1.3	2.6	8.62322	2.6	9.1		6.36867	2.90689	9.90051
	2.90689	2.6	9.37443		8.81703	6.5	2.6	3.9		3.9		2.6	9.1	2.6	9.1		7.00071	2.6	9.98549
	2.6	2.90689	8.72067		8.22192	7.35391	2.6	3.9		2.90689		3.18434	7.90759	2.6	9.1		6.36867	2.90689	10.7986
	2.90689	2.6	9.37443		9.1	7.35391	3.67696	3.67696		3.67696		2.90689	8.01374	2.90689	9.1		5.81378	3.18434	10.5612
	2.90689	2.90689	8.81703		8.81703	7.12039	3.18434	3.9		3.67696		3.67696	8.22192	2.6	8.81703		5.36004	2.6	10.4809
	3.67696	2.90689	8.72067		8.52467	6.5	2.90689	3.9		3.67696		2.90689	8.81703	2.90689	9.37443		4.68722	2.90689	11.183
	2.90689	2.6	9.1		9.1	7.00071	2.6	3.67696		3.67696		2.6	7.8	2.6	8.81703		4.31161	2.6	11.183
	2.6	2.6	9.19239		8.72067	6.755	2.6	3.9		3.9		3.18434	7.90759	2.6	9.46414		4.86415	2.90689	11.4075
	2.6	3.67696	9.19239		8.22192	7.00071	2.6	3.67696		3.9		2.6	8.01374	2.6	8.81703		3.9	2.6	11.7
	2.6	2.6	9.55301		8.72067	7.00071	2.6	3.9		3.67696		2.6	7.46793	3.18434	9.46414		3.9	2.6	11.0309
	2.6	3.9	9.55301		8.22192	7.00071	2.90689	3.67696		3.18434		3.18434	7.8	2.6	9.46414		3.9	2.6	11.0309
	2.6	2.6	9.55301		8.62322	6.755	2.90689	3.9		3.9		2.90689	7.90759	2.90689	9.37443			2.6	11.183
	2.6	4.11096	9.98549		8.62322	6.62873	2.90689	3.9		3.18434		2.90689	8.01374	2.6	9.98549			2.6	11.772
	2.6	2.90689	9.55301		8.81703	6.62873	2.90689	3.67696		3.9		3.18434	8.32406	2.6	9.46414			2.90689	12.3329
	2.25167	4.31161	9.46414		8.62322	6.5	2.90689	3.9		3.18434		2.90689	7.6909	2.90689	9.90051			2.25167	12.8035
	2.6	2.90689	9.72831		8.62322	7.58024	2.6	3.9		3.18434		2.90689	7.8	2.6	9.98549			2.90689	12.5367
	2.6	3.9	9.72831		9.1	7.58024	2.90689	3.9		3.18434		3.18434	7.90759	2.6	9.55301			2.6	12.8035
	2.6	2.90689	9.46414		8.62322	7.58024	2.90689	3.67696		3.18434		3.18434	7.00071	2.90689	10.2362			2.90689	11.183
	2.6	4.11096	10.1533		9.1	7.58024	2.90689	3.9		2.90689		2.6	7.58024	3.18434	10.1533			2.6	11.7
	2.6	2.6	9.55301		9.1	7.58024	2.6	3.9		2.6		2.90689	7.8	2.6	10.4809			2.90689	12.3329
	2.6	4.68722	9.55301		8.32406	7.58024	3.18434	3.67696		3.18434		2.90689	7.8	2.6	10.4809			2.6	11.6276
	2.6	2.6	10.1533		8.72067	7.46793	2.6	4.31161		3.18434		3.18434	6.62873	3.18434	10.5612			2.90689	12.2642
	2.6	4.86415	10.1533		8.72067	7.90759	2.6	3.9		2.90689		2.90689	7.00071	3.67696	10.7986			2.25167	12.8693
	2.6	2.6	10.4809		8.32406	8.01374	2.90689	4.50333		3.18434		2.6	7.46793	2.90689	11.0309			2.6	12.5367
	2.6	4.68722	10.1533		8.62322	8.22192	2.90689	4.50333		2.90689		2.6	7.8	2.90689	11.2583			2.6	11.7
	3.18434	2.6	10.7986		8.32406	8.22192	2.90689	4.50333		2.90689		2.6	7.8	2.6	10.5612			2.90689	12.5367
	3.18434	4.86415	10.2362		9.1	8.22192	3.67696	4.50333		3.67696		2.6	6.755	2.6	10.7201			2.6	12.5367
	3.67696	2.6	10.7986		8.32406	7.90759	2.6	4.31161		3.18434		2.90689	7.12039	2.6	11.1072			2.90689	12.5367
	3.67696	4.68722	10.7986		8.81703	7.90759	2.90689	3.67696		2.90689		2.90689	7.46793	2.6	11.6276			2.6	12.3329
	3.18434	2.6	10.7201		9.1	8.22192	2.6	3.9		2.6		3.18434	7.46793	2.90689	10.7986			2.90689	12.5367
	3.9	4.68722	11.1072		8.32406	8.32406	3.18434	3.9		3.67696		2.90689	7.8	2.6	11.4075			2.25167	12.3329
	3.18434	2.6	10.4809		9.28386	8.32406	2.90689	3.9		3.18434		3.18434	7.8	2.6	11.6276			2.6	13.2575
	3.18434	4.68722	11.1072		8.81703	8.01374	3.9	3.67696		3.67696		2.90689	6.5	2.6	11.4075			2.6	12.5367
	3.18434	2.6	10.7986		8.81703	7.90759	2.6	3.67696		3.18434		2.90689	6.5	2.90689	12.2642			2.6	13.2575
	3.18434	4.50333	10.4809		9.00666	8.22192	3.18434	3.67696		2.90689		3.18434	6.62873	3.18434	12.2642			2.6	12.8693
	3.18434	2.6	11.1072		9.1	8.32406	2.6	3.9		2.90689		2.90689	6.62873	2.6	11.9854			2.6	12.2642
	3.18434	4.11096	10.7986		8.72067	8.32406	3.67696	3.67696		2.6		2.90689	6.5	2.6	12.8035			2.6	13.0648
	2.90689	2.6	10.2362		9.00666	8.01374	2.6	3.67696		2.90689		2.6	6.5	2.90689	12.2642			2.6	12.5367
	2.90689	4.68722	11.183		8.81703	7.90759	3.18434	3.18434		2.6		2.6	6.62873	2.90689	12.7373			2.25167	11.4813
	2.90689	2.90689	10.5612		9.1	7.8	2.90689	3.67696		2.90689		2.6	6.5	2.6	12.2642			2.6	12.604
	2.6	4.11096	11.183		9.1	7.46793	3.67696	3.67696		2.6		2.6	6.62873	3.18434	12.8035			1.3	12.2642
	2.6	2.6	11.1072		8.72067	8.01374	2.90689	3.18434		2.90689		2.6	7.00071	2.6	12.5367			2.25167	11.183
		3.67696	11.6276		9.1	8.22192	3.9	3.18434		2.6		2.6	7.35391	3.67696	12.8035			1.3	11.9147
		2.6	11.4813		9.1	8.01374	3.18434	2.90689		2.6		2.6	6.62873	2.6	12.8035			2.6	11.7
		4.11096	11.9854		8.72067	7.90759	3.9	2.90689		2.6		2.6	7.00071	3.67696	12.4012			1.83848	11.8436
		2.6	11.9147		8.62322	7.8	2.90689	3.18434		2.6		2.6	7.58024	2.90689	12.7373			2.25167	11.4813
		3.67696	12.3329		9.1	7.6909	3.67696	2.90689		2.6		2.6	7.58024	2.90689	12.2642			1.83848	11.183
		2.6	12.2642		8.42496	8.01374	2.6	2.90689		2.6		2.6	7.00071	3.67696	12.5367			2.6	11.7
		3.67696	11.9854		7.6909	8.22192	3.67696	3.18434		2.6		2.90689	7.58024	3.18434	11.9854			1.83848	11.4075
		2.6	12.3329		7.46793	8.32406	2.90689	3.18434		2.90689		2.90689	7.90759	2.6	12.2642			2.25167
		3.9	11.7		7.00071	8.01374	3.9	2.90689		2.6		2.90689	7.12039	3.67696	11.6276			1.3
		2.25167	11.9854		6.5	7.90759	2.6	3.18434		2.6		2.6	7.6909	2.90689	11.1072			2.25167
		3.67696	12.2642		6.5	7.90759	3.9	2.90689		2.6		2.90689	8.01374	3.67696	10.7201			1.3
		2.6	11.183		5.36004	8.01374	2.90689	3.67696		2.6		2.6	7.12039	2.90689				2.25167
		3.67696	12.2642		5.95735	8.22192	3.67696	3.18434		2.90689		2.6	7.6909	3.67696				1.3
		2.6	11.183		6.5	8.01374	2.90689	2.90689		2.90689		2.25167	8.01374	2.6				1.83848
		3.9	11.183		5.81378	8.22192	3.67696	2.90689		2.6		2.6	8.22192	2.90689				1.83848
		2.25167	11.1072			8.22192	2.6	3.18434		1.83848		2.6	8.72067	2.6				2.25167
		3.67696	10.8766			8.22192	3.9	2.90689		2.6		2.6	7.90759	2.90689				1.83848
		1.83848	10.641			8.01374	2.6	2.25167		2.6		2.90689	8.32406	3.18434				2.6
		3.9	10.4809			7.90759	3.67696	2.25167		2.6		2.90689	8.72067	3.18434				1.83848
		2.25167	9.98549			7.8	2.6	1.83848		2.6		2.90689	9.1	2.90689				2.25167
		3.67696	9.37443			7.8	3.67696	2.90689		2.25167		2.90689	7.6909	3.67696				1.3
		2.6	9.72831			8.32406	2.90689	2.90689		2.6		2.6	7.12039	2.6				2.25167
		3.67696	9.37443			8.62322	2.90689	2.90689		2.6		2.6	6.755	3.67696				1.83848
		2.25167	9.90051			7.8	2.90689	2.25167		2.6		2.90689	6.62873	3.18434				2.25167
		3.67696	10.1533			8.32406	2.90689	2.25167		1.83848		2.25167	6.62873	2.90689				1.3
		2.25167	9.72831			8.22192	2.6	2.25167		2.6		2.90689	6.5	3.67696				2.25167
		3.67696	10.1533			8.01374	2.90689	1.83848		2.6		2.90689	6.5	2.90689				1.3
		2.6	9.90051			8.32406	2.6	2.25167		1.83848		2.90689	6.5	3.18434				1.83848
		3.18434	9.37443			8.32406	3.67696	1.83848		2.6		2.90689	6.5	2.90689				1.3
		2.6	9.90051			8.22192	2.90689	2.25167		2.6		2.6	5.36004	2.90689				2.25167
		2.90689	9.81478			8.32406	3.67696			2.6		2.6	5.36004	3.67696				1.3
		2.6	9.72831			7.6909	2.6			2.6		2.6	5.81378	3.18434				1.83848
		2.6	9.55301			7.90759	2.90689			2.25167		2.90689	5.95735	3.67696				1.83848
		2.25167	9.55301			7.8	2.6			2.6		2.6	6.36867	3.9				2.25167
		2.6	9.46414			8.62322	3.67696			2.6		2.6	6.5	2.6				1.83848
		1.83848	9.55301			8.81703	2.90689			2.6		2.90689	5.36004	2.90689				2.25167
		3.18434	9.1			8.72067	2.90689			2.6		2.90689	5.81378	2.6				1.83848
		1.83848	9.46414			8.42496	2.6			2.90689		2.90689	5.2	3.9				2.25167
		2.90689	8.62322			8.32406	2.90689			2.6		2.90689	5.95735	2.90689				2.25167
		2.25167	9.1			8.32406	2.6			2.6		2.90689	5.36004	2.90689				2.25167
		2.6	7.90759			8.42496	3.67696			2.6		2.90689	5.81378	2.6				1.83848
		2.6	8.22192			8.62322	2.90689			2.6		1.83848	7.00071	2.90689				1.83848
		2.6	8.32406			9.19239	3.67696			2.6		2.6	6.36867	2.6				1.3
		2.25167				9.28386	2.6			2.6		2.6	6.5	3.67696				1.83848
		3.67696				9.19239	2.90689			1.3		2.25167	6.5	2.6				1.3
		2.25167				9.1	2.6			2.6		2.90689	6.5	3.67696				1.83848
		3.67696				8.81703	2.90689			1.83848		2.90689	6.36867	2.6				1.3
		1.83848				8.72067	2.6			2.6		2.25167	6.62873	2.90689				1.83848
		2.90689				8.72067	3.18434			2.6		2.6	5.95735	2.6				1.3
		1.83848				9.81478	2.6			1.3		2.6	6.62873	2.6				1.3
		3.67696				9.98549	2.90689			1.83848		2.25167	5.81378	2.6				1.83848
		1.83848				10.2362	2.6			1.83848		2.25167	6.755	2.90689				1.3
		2.90689				10.1533	2.6			1.83848		1.83848	5.81378	2.6				1.83848
		1.3				9.98549	2.25167			1.3		2.25167	7.12039	2.90689				1.3
		2.6				9.90051	3.18434			1.3		2.6	5.95735	2.6				1.83848
		1.3				9.90051	2.6			1.83848		2.6	5.81378	2.90689				1.3
		2.90689				9.98549	3.18434			1.3		1.83848	5.81378	2.6				1.3
		1.3				10.2362	2.25167			1.83848		2.25167	5.81378	2.90689				1.3
		2.6				10.4809	3.67696			1.3		1.83848	5.36004	2.25167				1.3
		1.83848				11.183	2.6			1.3		2.25167	5.81378	2.90689				1.3
		2.6				11.1072	3.67696			1.3		1.83848	4.68722	1.83848				1.3
		1.3				11.1072	2.25167			1.3		2.25167	5.81378	2.6				1.83848
		2.6				11.0309	2.6			1.3		1.83848	4.68722	1.3				1.83848
		1.3				10.7986	2.25167			1.3		2.25167	5.51543	2.6				1.3
		2.6				10.7201	2.6			1.3		2.25167	4.68722	1.3				1.3
		1.83848				11.7	2.6			1.3		1.83848	5.36004	2.90689
		2.6				11.9147	2.90689			1.3		2.25167	3.9	1.83848
		1.83848				12.0557	2.25167					1.83848	5.2	2.6
		2.90689				11.9854	2.90689					1.83848	3.18434	1.83848
		1.3				11.8436	2.6					2.25167	4.86415	2.90689
		2.90689				12.0557	2.90689					1.83848	3.67696	1.3
		1.3				12.2642	2.6					1.83848	4.31161	1.83848
		2.6				12.2642	2.90689					2.25167	2.6	2.25167
		1.3				12.3329	2.90689					1.83848	2.90689	2.25167
		2.6				12.0557	2.90689					1.83848		1.3
		1.3				11.6276	2.6					1.83848		2.25167
		2.25167				11.6276	2.6					1.83848		1.3
		1.3				12.3329	2.25167					1.83848		1.83848
		2.6				12.5367	2.6					1.83848		1.83848
		2.25167				12.5367	2.25167					1.83848		2.6
		2.25167				11.6276	2.6					1.83848		1.3
		2.25167				12.8693	2.25167					1.83848		2.25167
		2.25167				11.9147	2.6					1.83848		1.3
		2.25167				12.604	2.25167					1.3		1.83848
		2.6				12.8035	2.90689					1.3		1.3
		1.83848				12.8035	1.83848					1.3		1.83848
		2.25167				12.8035	2.6					1.3		1.3
		2.25167				12.8035	2.25167					1.3		1.83848
		2.25167				12.3329	2.6					1.3		1.3
		2.25167				13.3843	2.25167					1.3		1.3
		1.83848				13.321	2.6					1.3		1.3
		1.83848				13.2575	2.25167					1.3		1.3
		1.3				13.0648	2.6					1.83848
		1.83848				12.8693	2.25167					1.3
		1.83848				12.8035	2.6					1.3
		1.83848				13.3843	1.83848					1.3
		1.83848				13.3843	2.6
						13.4473	2.25167
						13.6345	2.6
						13.4473	2.25167
						13.3843	2.90689
						13.3843	2.25167
						13.3843	2.6
						13.3843	2.25167
						13.3843	2.6
						13.321	1.3
						13.2575	2.6
						13.8802	1.3
						14.0014	2.6
						14.0014	1.83848
						14.0014	2.6
						14.0014	1.83848
						14.5344	2.6
						14.5344	1.3
						14.2408	2.6
						14.0616	1.3
						14.0014	2.6
						14.0616	1.3
						14.0616	2.6
						13.6345	1.3
						12.8035	2.6
						12.8035	2.25167
						12.8035	2.6
						12.2642	2.6
							2.6
							2.6
							2.6
							2.6
							2.6
							2.25167
							1.83848
							1.83848
							1.83848
							1.3
							1.3
							1.83848
							1.3
							1.83848
							1.83848
							1.83848
							2.25167
							2.25167
							1.83848
							1.3
							1.3
							1.83848
							1.3
							1.3
							1.3
							1.83848
							1.83848
							1.3
							1.3
							1.3
							1.3
							1.3
							1.3
							1.3
							1.3
							1.3
							1.3
							1.3
							1.3

## Sheet: Y25_72_MPI_th
Y25_72h_LofTh_102.csv.gz	Y25_72h_LofTh_51.csv.gz	Y25_72h_LofTh_216.csv.gz	Y25_72h_LofTh_229.csv.gz	Y25_72h_LofTh_242.csv.gz	Y25_72h_LofTh_204.csv.gz	Y25_72h_LofTh_89.csv.gz	Y25_72h_LofTh_127.csv.gz	Y25_72h_LofTh_153.csv.gz	Y25_72h_LofTh_38.csv.gz	Y25_72h_LofTh_165.csv.gz	Y25_72h_LofTh_191.csv.gz	Y25_72h_LofTh_63.csv.gz	Y25_72h_LofTh_255.csv.gz	Y25_72h_LofTh_12.csv.gz	Y25_72h_LofTh_76.csv.gz	Y25_72h_LofTh_114.csv.gz	Y25_72h_LofTh_178.csv.gz	Y25_72h_LofTh_140.csv.gz	Y25_72h_LofTh_25.csv.gz
1.13137	2.6533	2.6533	1.95959	3.91918	1.38564	2.6533	3.29848	2.99333	3.29848	4	3.39411	1.78885	3.57771	4.38178	2.88444	3.2	1.95959	0.8	2.4
1.6	2.88444	3.2	2.26274	3.39411	1.13137	2.77128	3.39411	3.2	2.88444	3.48712	3.48712	2.26274	4	4.30813	2.6533	3.29848	1.78885	1.13137	2.88444
1.6	3.29848	3.29848	2.26274	4	1.38564	2.77128	3.29848	3.2	2.99333	3.57771	3.48712	1.95959	3.66606	4.66476	2.52982	3.39411	1.78885	1.13137	2.88444
1.6	2.99333	3.29848	1.78885	3.57771	1.78885	2.88444	3.39411	3.2	2.88444	3.57771	3.48712	2.26274	3.2	4.59565	2.88444	3.66606	1.95959	1.13137	2.88444
1.78885	3.29848	2.99333	1.78885	3.57771	1.78885	2.88444	3.48712	3.29848	3.39411	3.29848	3.48712	2.26274	3.2	4.52548	2.52982	3.91918	1.95959	1.38564	2.88444
1.78885	2.99333	2.99333	1.78885	4	1.78885	2.99333	3.29848	3.29848	3.48712	2.6533	3.48712	1.95959	3.2	5.1225	2.88444	3.91918	2.26274	1.6	2.88444
2.26274	2.6533	2.6533	1.78885	4	1.6	2.88444	2.99333	3.2	3.39411	2.52982	3.48712	2.26274	3.2	5.1225	2.88444	3.39411	2.4	1.6	2.88444
2.52982	2.99333	2.99333	1.78885	4.07922	1.78885	2.6533	3.29848	3.2	3.39411	2.4	3.66606	2.26274	3.2	5.18459	2.99333	4	2.6533	0.8	3.29848
2.6533	2.52982	1.13137	1.95959	3.66606	1.95959	3.29848	3.29848	2.99333	2.88444	2.4	3.75233	2.26274	3.2	5.1225	3.39411	3.57771	2.4	1.95959	3.29848
2.6533	2.88444	1.13137	1.78885	3.57771	2.26274	2.99333	3.48712	2.99333	3.39411	2.4	3.91918	2.26274	3.2	5.1225	2.99333	3.66606	2.77128	2.99333	3.2
2.4	2.6533	1.13137	1.78885	3.91918	1.95959	2.88444	3.48712	3.2	3.39411	2.4	3.91918	1.95959	3.29848	5.6	3.39411	3.66606	2.88444	0.8	3.29848
2.52982	2.6533	2.6533	2.26274	3.66606	2.4	2.88444	3.66606	3.2	3.48712	2.4	3.75233	2.4	3.57771	5.65685	3.29848	3.75233	2.88444	2.6533	3.39411
2.52982	2.6533	1.6	2.26274	3.91918	2.4	2.88444	3.48712	3.2	3.48712	2.4	4.07922	2.26274	4	5.71314	4	3.66606	2.99333	2.88444	3.91918
2.6533	2.52982	1.6	1.95959	4	2.4	2.6533	3.29848	3.2	3.39411	2.52982	3.91918	1.95959	1.6	5.82409	4.07922	3.39411	2.88444	1.13137	3.57771
2.4	2.6533	1.78885	2.52982	3.39411	2.6533	2.6533	3.48712	3.2	3.29848	2.52982	1.6	1.6	1.6	6.09262	4	3.66606	2.88444	2.88444	4.30813
2.52982	2.4	2.26274	2.4	3.2	2.52982	2.6533	3.66606	3.29848	3.39411	2.52982	1.78885	1.78885	1.78885	5.65685	4.15692	3.39411	3.29848	1.6	4.66476
2.4	2.4	2.88444	2.52982	3.2	2.6533	3.29848	3.29848	3.57771	3.29848	2.4	1.78885	1.95959	2.26274	5.6	4.30813	3.57771	3.48712	1.95959	5.1225
1.78885	2.6533	2.6533	2.4	3.29848	2.52982	3.29848	2.99333	3.66606	3.39411	2.4	3.48712	2.26274	2.4	4.86621	4.59565	3.57771	3.91918	1.78885	5.18459
2.26274	2.4	2.88444	2.52982	3.29848	2.4	3.91918	2.88444	3.2	3.39411	2.6533	2.26274	2.26274	2.88444	4.93153	4.30813	3.91918	1.78885	2.52982	5.18459
1.78885	2.4	3.29848	2.6533	2.6533	2.26274	4	2.99333	3.29848	3.39411	2.88444	1.95959	2.4	2.52982	5.1225	5.1225	3.91918	3.66606	2.6533	5.36656
1.95959	1.95959	2.99333	2.88444	3.39411	2.4	4	2.99333	3.29848	3.91918	3.2	1.78885	2.6533	3.66606	5.36656	5.3066	4.07922	1.6	2.99333	4.73286
2.26274	1.95959	2.88444	3.29848	3.2	2.26274	4.59565	2.99333	2.99333	3.66606	2.52982	3.91918	2.88444	3.57771	5.65685	5.6	4	3.91918	1.6	5.76888
1.95959	2.4	2.99333	2.88444	3.29848	2.4	1.78885	2.88444	3.29848	3.29848	3.2	2.77128	2.99333	3.57771	5.82409	5.42586	4.30813	1.6	1.78885	5.18459
1.78885	2.4	2.99333	3.2	2.4	2.26274	1.78885	2.88444	2.99333	4	3.2	2.4	2.88444	3.66606	5.36656	5.18459	4.38178	3.91918	3.39411	5.42586
1.6	1.95959	2.99333	2.88444	2.4	1.78885	4.59565	2.6533	3.29848	3.57771	3.2	3.91918	3.29848	3.91918	5.42586	2.99333	4.07922	1.78885	3.57771	5.18459
1.6	2.4	3.29848	2.88444	2.52982	2.26274	2.52982	2.99333	3.39411	3.29848	1.78885	3.39411	3.39411	3.39411	5.87878	5.05964	4.07922	4.07922	3.29848	5.36656
1.78885	1.95959	3.29848	2.52982	3.2	2.4	2.6533	2.88444	2.99333	3.66606	1.95959	2.88444	3.91918	3.66606	5.82409	4.73286	4.38178	1.95959	2.88444	5.65685
1.6	2.4	2.88444	2.88444	3.2	2.4	2.4	2.88444	3.66606	2.88444	2.26274	4.07922	4.8	3.29848	5.36656	2.88444	4.30813	4.07922	3.29848	5.6
1.6	1.95959	2.99333	2.4	3.39411	1.95959	2.52982	2.88444	3.29848	2.99333	2.26274	3.29848	4.73286	3.66606	5.82409	2.88444	4.30813	1.95959	2.99333	5.65685
1.13137	2.6533	2.99333	2.52982	2.88444	2.4	2.52982	2.88444	3.91918	3.29848	2.4	4	4.15692	3.2	5.65685	3.2	4.07922	4.30813	3.39411	5.65685
1.13137	2.4	3.29848	2.26274	2.4	2.4	5.24595	2.88444	3.29848	3.39411	2.4	3.57771	4.07922	2.88444	5.36656	3.29848	3.48712	2.26274	3.29848	5.36656
1.13137	2.77128	3.29848	2.6533	2.88444	2.4	2.4	2.88444	3.66606	3.39411	3.2	2.26274	4	3.57771	5.6	4.66476	4	4.15692	3.91918	5.6
1.13137	2.6533	3.29848	2.4	3.2	2.88444	2.4	2.88444	3.57771	3.57771	1.78885	2.52982	3.91918	3.91918	1.13137	2.88444	3.75233	2.52982	1.13137	5.6
1.38564	3.29848	2.88444	2.26274	3.2	3.2	2.52982	2.99333	2.99333	3.57771	2.26274	4	3.66606	3.48712	5.6	2.88444	3.75233	4.07922	4	5.36656
1.78885	2.88444	2.99333	2.4	2.4	3.39411	2.52982	3.29848	3.2	3.39411	2.4	3.66606	3.48712	3.39411	1.13137	2.88444	3.48712	2.52982	1.13137	5.76888
1.6	3.29848	2.99333	2.26274	2.26274	3.91918	2.4	3.57771	3.66606	3.39411	2.52982	2.4	3.39411	3.39411	5.3066	4.52548	3.48712	4.59565	4.30813	5.82409
1.6	2.99333	2.88444	2.26274	3.29848	4.38178	2.4	3.66606	3.29848	3.29848	2.88444	2.88444	4	2.52982	1.38564	2.52982	3.57771	3.29848	0.8	5.6
2.26274	3.29848	2.88444	2.26274	3.91918	4.8	2.52982	3.75233	3.29848	3.29848	2.99333	4.38178	4.59565	3.91918	5.36656	2.26274	3.48712	4.52548	4.30813	5.36656
1.6	3.29848	2.99333	1.78885	3.57771	4.8	5.05964	3.75233	3.66606	3.29848	2.99333	3.66606	3.39411	4.07922	1.78885	1.95959	3.66606	3.29848	1.38564	2.26274
1.78885	3.2	2.99333	1.78885	3.29848	4.8	3.66606	4.07922	3.57771	3.39411	3.2	2.99333	3.39411	2.88444	5.18459	4.52548	3.66606	4.30813	4.59565	4.86621
1.95959	3.29848	2.88444	1.6	3.57771	5.87878	3.39411	4	3.39411	3.29848	2.88444	4.59565	2.4	2.6533	1.6	4.66476	3.66606	3.48712	1.6	5.6
2.26274	3.29848	2.52982	1.95959	3.39411	5.71314	4	4.15692	3.66606	2.88444	3.29848	3.57771	2.52982	2.52982	4.66476	4.30813	3.66606	4.59565	4.59565	5.76888
2.26274	2.52982	2.88444	1.6	3.29848	6.54828	4	4.59565	3.66606	3.29848	3.48712	3.29848	4.30813	2.52982	1.78885	2.4	3.48712	4	1.38564	2.26274
2.52982	2.88444	2.4	1.6	3.39411	6.29921	4	4.66476	3.91918	2.88444	3.2	4.93153	3.29848	3.91918	4.8	2.4	3.29848	4.59565	4.59565	2.26274
2.6533	2.88444	2.52982	2.4	3.29848	5.42586	4	4.66476	4.07922	2.99333	3.39411	1.6	2.88444	3.91918	2.26274	2.4	3.29848	4.30813	1.6	4.73286
2.88444	2.99333	2.4	2.4	3.39411	5.6	5.71314	4.59565	4.07922	3.39411	3.75233	1.6	3.2	2.26274	4.8	2.4	3.29848	4.38178	4.66476	5.98665
2.4	2.6533	2.99333	2.4	2.99333	6.03987	4.66476	4.66476	4	2.88444	3.91918	4	3.2	2.26274	1.6	4.30813	2.99333	3.91918	4.93153	5.65685
2.52982	2.88444	2.52982	2.26274	3.29848	6.03987	5.82409	4.59565	4	3.48712	4.07922	3.66606	4.07922	3.91918	4.73286	4.07922	2.99333	4.30813	1.13137	2.26274
2.99333	2.88444	2.6533	1.78885	2.99333	6.29921	4.8	4.66476	4.07922	3.29848	4.30813	5.6	3.29848	4.07922	2.26274	2.6533	2.99333	4.30813	1.78885	1.95959
2.88444	3.29848	2.99333	1.95959	3.2	6.03987	4.8	4.30813	4.30813	3.66606	3.39411	1.78885	3.29848	3.66606	4.66476	2.52982	2.77128	4.59565	1.6	2.26274
3.39411	2.88444	2.6533	2.26274	2.88444	6.03987	6.88186	4.30813	4.07922	4.15692	4.30813	3.75233	3.91918	1.78885	2.26274	2.52982	2.99333	4.07922	1.78885	2.26274
3.39411	3.29848	2.6533	2.26274	3.2	6.29921	6.14492	4.66476	1.13137	4.30813	4.59565	4	3.29848	1.38564	4.73286	3.91918	2.99333	3.91918	5.24595	3.91918
3.39411	2.99333	2.6533	2.52982	2.4	6.44981	5.71314	4.8	1.13137	4.73286	4.73286	5.82409	3.48712	1.78885	2.4	4.07922	3.39411	4.59565	1.13137	2.88444
3.39411	3.29848	2.6533	2.4	2.52982	5.82409	6.03987	4.59565	1.13137	4.93153	4.8	1.95959	3.66606	3.66606	4.86621	2.99333	3.66606	4.38178	1.6	2.6533
3.91918	3.48712	2.88444	2.4	2.88444	5.71314	7.15542	4.73286	1.38564	4.07922	3.91918	4	3.66606	3.75233	2.52982	3.29848	4.07922	4.30813	5.6	3.75233
4	3.66606	3.29848	2.4	2.4	5.65685	6.88186	5.1225	1.6	4	1.78885	4.30813	3.57771	3.91918	4.73286	3.66606	4.30813	4.59565	1.38564	3.48712
4	2.88444	2.6533	2.4	2.88444	5.71314	7.01997	5.1225	2.4	4.59565	4.66476	5.98665	3.57771	1.38564	2.52982	4	4.07922	4.30813	1.95959	3.29848
4.15692	3.57771	2.88444	2.4	2.26274	5.1225	7.2	4.66476	2.52982	4	4.93153	2.4	3.91918	3.66606	4.66476	2.99333	4.38178	4.30813	5.6	5.87878
4.30813	3.91918	3.29848	2.4	3.57771	5.3066	7.01997	4.30813	4	4	4.07922	4.30813	3.66606	1.13137	2.52982	3.39411	4.8	3.91918	0.8	1.6
4.30813	3.75233	2.52982	2.4	3.57771	5.36656	6.49923	4	1.78885	4	1.6	4.30813	3.39411	1.13137	4.59565	3.57771	4.59565	4.07922	0.8	5.6
4.38178	3.75233	2.88444	2.52982	2.99333	5.36656	1.78885	4	1.78885	3.91918	1.78885	4.07922	4.30813	3.91918	2.6533	4.07922	4.59565	4.30813	0.8	5.6
4.52548	2.99333	2.52982	2.4	3.29848	5.36656	1.6	4.07922	2.99333	4	1.38564	6.44981	4.30813	3.66606	4.38178	3.29848	4.59565	4.73286	0.8	5.82409
4.07922	3.48712	2.4	2.6533	2.88444	5.6	1.13137	4.30813	4.59565	4	1.78885	3.29848	3.29848	3.66606	2.88444	2.99333	4.59565	4.07922	1.13137	5.82409
4.07922	3.66606	3.29848	2.6533	3.29848	5.6	6.29921	3.39411	2.99333	3.66606	4.73286	4	3.39411	3.66606	4.30813	3.29848	4.8	4.30813	0.8	5.65685
4	3.66606	2.99333	2.52982	3.29848	5.82409	1.78885	2.99333	3.29848	3.66606	5.1225	4.59565	4.86621	1.13137	2.6533	3.57771	4.93153	4.07922	0.8	5.87878
4	3.57771	2.6533	2.88444	3.2	5.71314	1.6	3.39411	3.39411	4.07922	4.73286	7.41889	3.39411	1.13137	4.15692	4	4.59565	4.30813	1.6	6.03987
4	3.29848	4	3.2	3.2	5.6	5.82409	2.88444	3.66606	4	4.52548	4.07922	5.05964	3.91918	2.52982	2.88444	4.30813	4.30813	1.38564	6.03987
4.30813	3.91918	3.2	2.52982	2.52982	5.42586	1.78885	2.26274	4.30813	3.2	4.38178	4.52548	5.3066	3.91918	4.38178	3.48712	4.93153	3.39411	1.13137	6.03987
4.30813	3.66606	2.88444	3.2	2.99333	5.36656	6.14492	3.29848	4.66476	2.99333	1.6	4.73286	5.1225	3.57771	2.6533	2.26274	4.73286	3.57771	0.8	6.03987
4.30813	3.57771	4.30813	2.99333	3.2	5.6	1.78885	1.78885	4.59565	2.99333	1.6	4.93153	3.29848	1.13137	4.30813	2.4	4.59565	3.66606	1.78885	6.03987
4.38178	3.29848	3.2	2.99333	3.2	5.6	2.26274	3.91918	4.38178	2.88444	1.6	4.86621	5.36656	1.13137	2.52982	2.52982	5.18459	3.66606	2.6533	6.03987
4.52548	3.57771	3.29848	2.99333	2.99333	4.73286	6.29921	0.8	4.38178	2.99333	4.52548	5.05964	3.39411	3.91918	4.59565	2.88444	4.93153	4.38178	5.6	6.03987
4	3.66606	2.88444	2.88444	2.99333	5.36656	5.76888	4.52548	4.59565	2.99333	4.30813	7.9196	5.76888	3.91918	2.6533	2.99333	4.59565	4.30813	2.4	6.03987
4.30813	3.39411	3.2	2.99333	2.77128	5.05964	1.95959	4.30813	4	2.88444	1.6	3.57771	5.05964	3.57771	4.66476	2.6533	5.05964	4.30813	1.95959	6.09262
3.57771	3.39411	3.2	2.99333	3.39411	4.93153	1.78885	3.66606	4.07922	3.2	1.95959	5.6	3.66606	3.2	2.52982	3.57771	4.93153	4.52548	1.78885	1.13137
3.91918	3.91918	4.38178	3.2	3.57771	4.93153	5.36656	0.8	4.30813	3.2	1.78885	7.83837	4.66476	3.29848	4.66476	2.52982	5.1225	4	1.78885	6.2482
3.91918	3.57771	3.66606	3.29848	3.29848	5.36656	2.26274	0.8	4.30813	3.2	4.73286	3.39411	4.66476	3.91918	2.6533	3.66606	4.93153	4	3.29848	6.49923
3.66606	3.2	4.66476	3.39411	3.91918	5.1225	5.76888	0.8	4	3.2	4.66476	5.82409	4.73286	2.4	4.66476	3.66606	4.59565	3.66606	5.65685	1.13137
3.91918	3.39411	3.91918	3.39411	3.2	4.93153	1.95959	4	4	3.2	1.38564	5.42586	3.66606	2.4	2.6533	2.99333	4.93153	3.39411	2.26274	1.13137
4.07922	3.39411	3.66606	3.29848	2.52982	5.05964	2.26274	4.07922	4.07922	3.2	1.78885	6.2482	3.66606	2.52982	4.59565	3.66606	4.59565	4.07922	2.6533	6.14492
3.91918	3.66606	3.57771	3.57771	3.2	4.38178	2.52982	4.07922	3.91918	3.2	1.6	6.69328	3.91918	2.52982	2.52982	3.39411	4.66476	4.30813	4.38178	1.13137
4.30813	2.99333	3.66606	3.29848	2.52982	5.05964	5.65685	4.30813	3.91918	3.2	5.05964	7.54718	3.66606	2.4	2.6533	3.39411	4.8	4.66476	5.65685	6.6453
4.30813	3.29848	4.66476	3.39411	2.6533	4.93153	2.26274	4.59565	4.07922	3.2	4.59565	7.71492	4	2.52982	2.6533	2.6533	4.66476	4.07922	2.88444	1.13137
4.30813	3.39411	3.91918	3.39411	2.52982	4.86621	2.4	4.52548	4	3.2	1.13137	2.88444	4	2.6533	4.93153	4.07922	4.30813	3.91918	2.6533	5.87878
4.30813	4.30813	4.30813	3.66606	2.99333	4.93153	2.4	4.59565	4	2.99333	4.59565	6.78823	3.91918	2.99333	2.6533	2.99333	4.30813	4.66476	2.4	1.38564
4.30813	2.99333	3.91918	3.66606	3.57771	4.66476	5.65685	4.8	4	3.2	4.73286	7.01997	3.91918	3.2	5.1225	2.6533	4.30813	4.59565	2.99333	5.87878
4.59565	3.29848	5.36656	3.57771	2.99333	5.1225	1.78885	1.95959	3.91918	2.99333	1.38564	6.78823	3.48712	2.99333	2.52982	4.07922	4	4.30813	5.1225	1.78885
4.59565	3.57771	3.91918	3.29848	3.29848	4.66476	2.26274	5.05964	3.66606	2.99333	4.15692	6.88186	2.88444	2.52982	4.93153	4.07922	4.30813	4.30813	4.86621	5.98665
4.93153	3.39411	4	3.91918	3.39411	4.86621	5.65685	3.57771	3.57771	3.2	4.38178	7.01997	2.99333	3.29848	2.88444	4.30813	4	4.07922	3.2	2.4
5.36656	4.59565	4.15692	3.57771	3.66606	4.66476	1.78885	2.99333	3.29848	3.2	4.30813	7.2	2.88444	3.39411	1.78885	3.91918	4.15692	4.07922	3.2	6.29921
5.6	3.48712	4.30813	4	2.99333	4.73286	2.26274	2.99333	4.07922	3.39411	4.30813	6.49923	2.88444	3.66606	5.1225	4.38178	4	3.75233	3.2	2.99333
5.36656	3.66606	5.65685	3.66606	2.99333	4.86621	5.82409	2.99333	4.07922	3.39411	3.91918	6.03987	3.29848	4.66476	2.6533	3.39411	3.66606	3.75233	3.29848	3.2
5.71314	4.73286	4	3.2	3.39411	4.66476	1.78885	2.77128	4.15692	3.57771	3.75233	5.71314	3.39411	4	2.4	4.15692	3.91918	3.48712	3.29848	6.29921
5.6	3.39411	4.07922	3.2	2.99333	5.1225	2.4	2.52982	4.07922	3.57771	2.6533	5.6	3.29848	5.42586	5.1225	2.99333	3.91918	3.75233	3.39411	3.39411
3.2	3.57771	4.30813	3.29848	3.29848	5.05964	2.77128	2.26274	4.59565	4	2.26274	4.86621	3.66606	5.6	2.4	3.66606	3.91918	3.48712	2.99333	6.49923
4.07922	3.91918	6.09262	3.2	3.75233	4.93153	2.4	1.95959	4.38178	4.07922	1.78885	4.93153	3.75233	5.71314	2.88444	4.30813	4	3.29848	2.4	4.07922
4.73286	3.91918	4.15692	3.2	3.57771	5.24595	6.2482	5.05964	4.59565	4.59565	1.78885	4.52548	3.66606	5.65685	5.1225	4.66476	3.57771	2.99333	2.4	4.30813
5.1225	3.91918	4.38178	3.2	3.57771	4.38178	2.99333	4.93153	4.38178	4.8	1.78885	2.52982	4	5.05964	2.52982	4.07922	4	2.99333	2.99333	4.38178
5.05964	3.91918	5.76888	3.2	3.66606	5.36656	5.98665	4.30813	4	4.66476	4.30813	6.54828	3.39411	4.52548	3.29848	4	3.66606	2.99333	3.29848	4.30813
4.8	3.91918	5.76888	3.2	3.91918	4	2.99333	4.07922	3.29848	5.05964	4.30813	6.88186	4.07922	4.07922	5.18459	4.8	4.07922	2.99333	2.99333	4.07922
4.59565	3.91918	5.1225	3.2	3.91918	5.1225	3.29848	3.91918	3.57771	5.82409	4.59565	4.52548	3.2	4.8	2.52982	4.86621	4.30813	2.99333	2.99333	3.57771
4.38178	3.91918	4.38178	3.2	3.91918	5.3066	3.2	3.66606	3.57771	4.30813	3.29848	2.6533	2.88444	5.65685	3.39411	4.52548	4.07922	3.29848	4.8	3.91918
3.66606	3.91918	4.73286	3.29848	4	4.30813	6.09262	3.48712	3.57771	5.6	2.6533	6.6453	2.88444	4.86621	5.36656	4.52548	4	2.99333	2.99333	4
3.39411	5.18459	6.6453	2.99333	4	5.42586	4	2.99333	4	5.6	1.78885	4.30813	3.29848	4.93153	2.52982	4.59565	4.59565	3.29848	2.52982	3.39411
2.4	3.39411	5.65685	3.2	4	5.18459	6.29921	2.99333	2.4	4.07922	2.26274	3.91918	2.99333	4.66476	3.66606	5.65685	4.30813	3.29848	2.52982	3.29848
2.4	3.57771	5.18459	3.2	4.30813	4.66476	6.69328	2.99333	4	4.30813	2.4	2.52982	2.99333	4.38178	5.6	5.6	4.73286	3.48712	2.52982	3.39411
4.73286	3.66606	5.05964	3.2	4	5.42586	4.59565	2.99333	3.66606	4.66476	2.26274	6.49923	4	4.15692	2.6533	5.36656	3.39411	3.29848	2.52982	6.78823
3.66606	3.91918	4.73286	3.2	4.30813	4.66476	4.73286	2.99333	3.57771	4.8	2.26274	6.29921	2.52982	4	4.30813	5.65685	4.59565	3.66606	2.52982	4.38178
3.57771	3.91918	4.59565	3.2	3.66606	5.65685	6.49923	2.77128	4.07922	4.86621	2.26274	3.91918	2.77128	4.52548	3.91918	5.6	3.48712	3.75233	2.52982	4.30813
3.39411	4	4.07922	3.29848	4.07922	5.6	5.6	1.78885	4	5.1225	2.4	3.75233	2.88444	3.75233	4.30813	5.1225	3.2	4.07922	2.6533	4.07922
3.39411	4	3.91918	3.29848	4.30813	4.66476	5.42586	0.8	4.38178	1.95959	2.26274	3.66606	2.6533	3.66606	4.59565	4.93153	4.86621	4.52548	2.52982	4.30813
3.48712	4.15692	3.66606	2.88444	4.30813	5.36656	5.36656	0.8	4.30813	1.78885	2.52982	3.29848	2.88444	4	4.93153	4.38178	3.29848	4.07922	2.26274	4.07922
3.29848	4.15692	3.39411	2.99333	4	5.71314	6.9282	0.8	4.59565	1.6	2.6533	3.48712	2.6533	4	5.1225	4.07922	2.6533	4.66476	2.6533	4.07922
3.29848	4.93153	3.29848	3.2	4	4.73286	6.59697	0.8	4.93153	3.91918	3.39411	2.4	2.99333	4	5.65685	4	5.36656	4.73286	2.99333	4.30813
1.6	4.59565	4	2.4	4	5.3066	5.76888	1.13137	4.93153	3.39411	3.29848	6.2482	2.99333	4.30813	5.1225	3.57771	3.29848	5.65685	2.6533	4.07922
4.59565	4.38178	4.07922	2.4	4	5.1225	6.49923	1.78885	5.3066	3.29848	3.29848	3.66606	2.99333	4.07922	2.6533	4.07922	2.88444	4.93153	4.07922	3.29848
2.88444	4.15692	4.30813	2.88444	4	5.42586	6.6453	2.4	5.3066	3.29848	3.29848	1.95959	2.88444	3.39411	4.52548	4	5.65685	4.59565	3.66606	3.48712
2.88444	5.3066	4.15692	2.26274	3.91918	2.4	6.78823	5.05964	5.3066	3.29848	4.59565	5.98665	4	3.39411	5.1225	4	3.29848	4.93153	3.66606	2.88444
3.29848	4.93153	4.07922	1.78885	3.66606	2.4	6.88186	5.1225	5.3066	4.66476	4.30813	5.82409	2.4	3.39411	4.93153	4.07922	2.99333	5.1225	1.13137	2.99333
3.29848	3.66606	4.30813	1.6	4	5.71314	6.8352	4.38178	5.6	1.95959	2.26274	2.26274	2.88444	3.39411	4.93153	4.07922	2.99333	5.6	1.13137	3.29848
2.99333	4	4.30813	1.6	3.91918	5.6	6.49923	1.38564	5.05964	1.6	4	5.98665	2.88444	3.39411	5.6	4.30813	5.87878	6.59697	0.8	3.29848
2.88444	3.91918	5.82409	3.2	3.66606	2.52982	7.01997	3.2	5.3066	1.13137	3.91918	2.26274	2.52982	3.39411	2.4	4.66476	2.88444	5.1225	0.8	6.88186
2.88444	4.07922	3.2	1.78885	3.48712	2.88444	6.29921	4.07922	5.05964	1.38564	4.30813	5.87878	2.6533	3.39411	4.8	4.66476	3.29848	4.66476	0.8	4.30813
2.88444	3.29848	3.2	1.95959	3.66606	5.87878	6.44981	5.3066	5.05964	4	4.30813	5.6	2.6533	4	5.1225	5.05964	2.99333	5.36656	4.8	4.07922
2.26274	3.29848	3.2	1.78885	3.66606	5.3066	6.6453	5.05964	4.59565	3.91918	4.30813	2.26274	4.07922	3.39411	5.36656	5.36656	6.49923	5.42586	2.52982	2.99333
2.4	3.29848	3.2	3.2	3.48712	2.99333	6.44981	1.38564	4.59565	4.15692	1.78885	5.6	2.4	3.39411	2.52982	5.6	2.88444	5.6	2.4	2.88444
1.38564	3.39411	3.2	1.6	3.39411	6.2482	6.29921	5.1225	4.30813	4.30813	4.30813	5.6	2.88444	3.39411	5.6	5.6	3.91918	6.09262	1.78885	7.15542
1.6	3.66606	3.29848	2.99333	3.48712	5.05964	6.14492	5.1225	4.30813	1.78885	4.30813	2.4	2.88444	3.39411	2.4	5.6	5.36656	4.59565	4	4.38178
4.59565	3.91918	3.57771	2.88444	3.57771	2.99333	5.6	1.13137	4	1.78885	4.38178	5.54256	2.6533	3.39411	4.93153	5.6	5.6	6.44981	4	2.99333
4.59565	4	3.91918	2.6533	3.66606	6.59697	5.87878	5.36656	5.1225	1.78885	4.15692	2.26274	4	3.39411	2.4	5.6	5.76888	6.59697	3.91918	3.29848
2.88444	3.66606	3.66606	2.6533	3.66606	5.1225	5.6	1.13137	4.07922	4.30813	1.78885	5.1225	2.26274	3.29848	5.05964	2.26274	5.82409	6.44981	3.57771	3.29848
2.88444	3.39411	4	2.99333	3.91918	2.88444	5.87878	4.86621	4.07922	3.57771	1.78885	1.95959	2.4	4	2.4	2.26274	5.98665	6.29921	2.26274	2.99333
2.52982	3.29848	4	2.88444	3.91918	2.88444	5.82409	1.13137	3.57771	1.6	4.59565	5.24595	3.29848	3.57771	4.93153	2.99333	6.09262	5.71314	1.78885	2.88444
2.6533	4.73286	4	2.52982	3.91918	6.44981	5.82409	5.05964	5.1225	1.78885	4.07922	1.78885	2.88444	3.91918	2.52982	2.88444	2.99333	6.44981	4.93153	3.29848
2.88444	3.39411	4	2.52982	4.07922	5.82409	5.6	5.3066	3.66606	1.78885	1.78885	5.36656	2.99333	4	5.05964	3.29848	5.3066	5.87878	5.1225	7.24431
2.88444	3.91918	4	2.6533	4.07922	6.29921	5.6	5.3066	3.91918	1.78885	1.95959	1.78885	2.88444	3.29848	2.4	3.29848	4.38178	5.6	2.4	4.30813
2.88444	4.15692	4.07922	2.88444	4.30813	6.03987	5.6	5.05964	3.39411	2.26274	1.78885	5.54256	4.38178	3.29848	4.86621	3.75233	4.59565	5.82409	2.4	4.07922
2.88444	4.59565	4.15692	2.88444	5.05964	4.86621	5.42586	4.86621	5.1225	2.4	1.78885	2.26274	1.78885	3.29848	2.52982	3.66606	4.73286	6.14492	4	3.29848
2.99333	3.29848	4.07922	3.2	4.52548	2.52982	5.6	5.1225	3.66606	2.52982	1.78885	5.1225	3.29848	4	4.93153	5.65685	4.8	6.03987	2.52982	3.75233
1.6	4.93153	4	3.2	0.8	2.99333	5.6	5.42586	3.57771	2.52982	4.59565	2.26274	2.99333	2.88444	2.4	1.13137	4.8	1.13137	2.4	3.66606
4.38178	3.91918	5.71314	2.99333	1.13137	5.1225	4.86621	5.36656	3.39411	4.07922	4.15692	5.54256	4.30813	2.99333	4.38178	1.13137	4.73286	5.71314	5.36656	3.91918
2.99333	3.66606	5.36656	2.99333	1.13137	5.05964	5.05964	5.05964	3.66606	3.48712	4.66476	1.95959	1.95959	2.99333	2.4	2.26274	4.66476	1.13137	1.13137	3.91918
2.99333	3.57771	5.1225	2.88444	1.6	6.03987	5.3066	4.86621	3.91918	2.26274	4.30813	5.24595	2.52982	2.88444	4.59565	2.99333	4.73286	5.87878	0.8	3.66606
3.29848	4.93153	5.05964	2.52982	5.6	5.3066	5.42586	5.36656	4.86621	3.2	4.07922	1.6	2.26274	2.88444	2.52982	4.30813	4.66476	1.13137	1.13137	3.48712
3.48712	3.2	4.73286	3.2	2.4	3.2	5.18459	5.42586	3.57771	3.2	4.07922	5.1225	3.29848	2.88444	4.59565	4.07922	4.66476	6.03987	1.13137	6.59697
3.39411	3.29848	4.66476	3.2	2.26274	5.76888	5.6	5.1225	3.29848	3.2	4.59565	1.6	3.29848	4.30813	2.4	4.38178	4.66476	1.13137	2.6533	4.15692
1.6	4.15692	4.30813	3.29848	1.78885	4.66476	5.98665	5.6	3.2	3.2	4.30813	4.8	3.29848	4	4.59565	5.1225	4.66476	6.14492	2.26274	4.30813
3.91918	3.91918	4.38178	3.2	1.6	4.66476	6.44981	5.24595	3.2	4.07922	5.1225	1.6	3.29848	4.30813	1.95959	5.71314	4.66476	1.38564	3.91918	3.29848
3.91918	4	4	3.2	1.6	4.86621	6.44981	4.93153	4.30813	3.66606	4.07922	5.18459	4.07922	4.30813	4	1.6	4.38178	6.14492	3.66606	2.99333
3.39411	4	4.07922	3.2	6.09262	2.6533	6.6453	4.73286	3.2	3.29848	5.76888	1.6	2.4	2.88444	2.4	1.6	4.59565	1.6	5.05964	2.99333
3.75233	3.91918	4.30813	3.29848	5.36656	5.36656	7.01997	4.59565	3.2	4	4.07922	4.73286	3.39411	2.88444	4.30813	1.6	5.42586	5.82409	0.8	2.99333
3.66606	4	4	3.29848	4.59565	3.91918	7.33212	4.38178	4	4	6.09262	5.18459	4.30813	2.6533	2.26274	5.05964	2.88444	1.95959	1.13137	2.88444
3.39411	4	4.07922	3.39411	4.52548	4.15692	7.58947	4.8	4	3.57771	4	2.26274	2.26274	2.52982	4	4.86621	5.71314	5.87878	2.4	2.99333
3.48712	4.07922	4	3.29848	4.30813	4.07922	7.58947	4.8	4.66476	4.07922	6.14492	4.93153	1.95959	2.52982	2.52982	5.65685	5.87878	2.4	2.26274	2.99333
3.2	3.57771	4.52548	1.13137	4.07922	4.30813	7.71492	4.8	4.15692	4.30813	3.91918	2.26274	3.39411	2.52982	3.66606	5.71314	4.93153	5.82409	4	2.99333
3.29848	4.30813	4.52548	1.13137	3.91918	3.48712	7.28835	4.8	4.15692	3.91918	6.44981	5.1225	3.29848	2.52982	2.52982	5.36656	5.65685	2.52982	5.36656	3.48712
3.29848	4.93153	4.52548	1.6	3.66606	3.39411	6.97424	4.8	4.07922	2.99333	3.57771	2.26274	3.39411	2.52982	4.30813	5.65685	5.1225	5.36656	1.13137	3.29848
1.6	5.1225	4.93153	1.6	3.29848	3.39411	6.44981	4.86621	4.86621	4.07922	6.49923	5.36656	2.99333	3.29848	2.52982	5.65685	5.6	3.29848	1.13137	3.48712
4	5.05964	4.93153	3.39411	2.88444	3.48712	5.82409	5.05964	4.86621	4	6.09262	2.26274	3.29848	2.4	3.91918	5.71314	5.3066	5.6	1.13137	3.57771
3.29848	4.73286	4.52548	0.8	2.99333	3.66606	2.88444	5.3066	5.05964	2.6533	3.91918	5.36656	3.29848	3.29848	2.52982	6.14492	5.6	3.57771	1.78885	3.66606
3.29848	4.93153	4.59565	1.13137	1.6	3.57771	2.99333	5.3066	5.05964	2.4	6.44981	2.26274	4.59565	3.29848	4.30813	6.44981	5.6	5.3066	1.38564	3.91918
3.39411	3.29848	4.8	3.29848	5.82409	3.29848	6.6453	4.73286	2.99333	4.73286	6.88186	5.1225	1.78885	3.29848	2.88444	6.44981	5.6	3.66606	2.52982	3.75233
3.29848	4.38178	4.93153	2.4	6.2482	3.2	6.8352	4	3.66606	4.38178	3.91918	5.42586	1.78885	3.29848	4.30813	6.44981	5.1225	5.54256	2.52982	3.75233
3.75233	4.30813	5.42586	1.6	5.76888	3.2	6.44981	3.29848	3.39411	2.6533	6.8352	2.4	1.38564	3.29848	2.99333	6.44981	4.86621	3.91918	4.07922	3.91918
4.07922	4.38178	6.03987	1.6	5.6	3.2	5.71314	3.57771	3.66606	4.73286	7.33212	5.05964	3.39411	2.52982	4.07922	5.71314	4.86621	5.54256	5.05964	3.91918
3.66606	4.93153	5.82409	2.99333	4.8	2.52982	5.36656	3.2	3.39411	2.52982	7.2	5.36656	2.99333	2.52982	3.29848	5.87878	4.93153	4.59565	1.13137	3.91918
4.15692	5.18459	5.98665	3.29848	4.73286	4.66476	5.05964	2.4	3.29848	4.8	7.01997	2.26274	3.39411	2.52982	4.30813	5.87878	3.39411	5.24595	1.78885	3.29848
3.75233	3.57771	5.65685	2.99333	4.59565	3.91918	4.73286	1.78885	3.57771	4.30813	6.49923	5.05964	4.38178	2.6533	3.91918	6.03987	5.76888	4.66476	1.6	2.99333
4.07922	4.73286	6.29921	2.52982	4.30813	4.07922	2.99333	1.38564	3.29848	3.91918	6.8352	5.36656	1.38564	2.88444	4.59565	6.09262	6.44981	4.93153	1.38564	3.29848
4.30813	3.39411	6.44981	3.48712	3.66606	4.66476	2.77128	5.05964	3.48712	2.6533	6.2482	5.1225	3.39411	2.88444	4.38178	5.76888	6.2482	4.8	1.13137	6.6453
4.15692	4.59565	6.29921	3.39411	3.91918	3.66606	6.44981	1.13137	3.29848	4.38178	6.29921	2.52982	2.99333	2.88444	5.1225	6.09262	5.1225	4.59565	2.52982	3.91918
4.30813	3.39411	6.2482	3.39411	3.29848	3.2	4.86621	1.13137	4.59565	2.88444	5.82409	5.36656	3.29848	1.95959	4.93153	5.76888	3.39411	4.73286	2.88444	2.99333
4.30813	4.30813	5.98665	3.2	3.66606	2.99333	4.8	5.05964	5.05964	4.93153	5.36656	5.65685	3.48712	3.2	4.93153	5.76888	5.76888	4.66476	2.6533	2.77128
4.30813	4.30813	6.2482	3.2	3.66606	2.88444	2.52982	1.13137	5.36656	2.88444	5.36656	5.71314	4.93153	2.88444	5.1225	5.42586	5.36656	4.93153	4.07922	2.88444
4.59565	2.99333	5.87878	2.99333	3.29848	2.6533	2.6533	5.05964	5.05964	5.3066	3.66606	2.6533	1.6	2.88444	5.18459	5.6	5.05964	4.38178	4.30813	2.77128
4.93153	4.59565	6.14492	2.88444	3.39411	2.52982	2.88444	5.05964	4.93153	5.1225	6.78823	5.87878	1.13137	2.88444	5.42586	5.36656	6.09262	4.38178	4.66476	2.99333
5.3066	4.38178	5.87878	2.99333	3.29848	2.52982	3.2	5.05964	5.1225	3.29848	4.86621	2.88444	3.39411	2.99333	5.42586	5.76888	4.52548	4.30813	1.6	2.99333
5.87878	3.39411	5.6	3.2	3.39411	2.4	3.2	5.05964	4.52548	5.36656	4.8	6.2482	2.99333	2.99333	5.1225	4.73286	3.75233	4.07922	1.6	3.29848
5.82409	4.59565	5.05964	2.99333	2.99333	2.52982	3.39411	4.66476	4	3.39411	4.86621	5.87878	4.8	2.88444	6.03987	5.36656	5.65685	4.59565	2.88444	2.99333
6.09262	4.38178	6.54828	3.2	3.2	2.88444	3.57771	4.66476	4	5.6	4.52548	2.88444	1.78885	2.99333	5.3066	4.59565	5.6	4.52548	2.88444	2.88444
5.65685	4.30813	6.44981	3.29848	3.29848	2.88444	3.2	4.66476	3.57771	5.36656	3.48712	6.44981	3.29848	2.52982	6.29921	4.38178	5.65685	4.07922	4.30813	3.29848
5.1225	3.29848	6.54828	2.6533	3.57771	2.6533	2.99333	4.66476	3.39411	2.99333	7.37564	6.29921	3.29848	2.52982	5.76888	4.30813	4	3.75233	4.59565	3.39411
5.6	4.59565	6.2482	3.39411	3.57771	2.4	6.49923	4.8	2.26274	5.36656	4.59565	6.14492	3.29848	2.52982	5.82409	5.36656	4.07922	3.75233	4.59565	3.39411
5.6	4.59565	4.73286	2.88444	3.57771	2.4	4	4.8	2.88444	2.88444	4.38178	2.99333	3.29848	2.52982	6.8352	3.66606	6.4	4.8	4.73286	6.8352
5.82409	4.30813	6.78823	1.78885	2.99333	2.4	4	4.8	3.29848	5.6	4.30813	6.8352	4.59565	2.52982	5.65685	4.66476	6.44981	4.07922	2.4	4
5.82409	2.88444	6.44981	2.99333	2.88444	4	4	4.86621	2.99333	2.88444	4.07922	6.54828	1.78885	2.52982	5.82409	2.99333	6.09262	3.48712	2.4	7.75629
6.09262	4.86621	3.91918	1.95959	2.88444	3.91918	4	4.66476	2.6533	5.24595	3.57771	3.2	1.78885	2.52982	6.78823	4.38178	3.57771	3.48712	2.52982	4.30813
6.09262	2.88444	6.49923	3.29848	3.39411	4.07922	4	5.05964	3.29848	5.3066	6.78823	7.15542	2.99333	2.52982	6.44981	2.52982	4.07922	4.59565	2.99333	7.75629
5.82409	5.18459	6.29921	1.78885	3.39411	3.57771	4	5.05964	3.29848	2.77128	7.33212	7.15542	3.29848	2.4	6.78823	2.52982	6.29921	4	3.29848	4
5.36656	5.05964	3.2	2.26274	2.88444	3.91918	4	5.05964	2.99333	5.54256	7.28835	3.29848	4.30813	3.39411	6.8352	4.59565	6.44981	4	3.2	7.33212
5.6	2.99333	3.2	2.4	2.88444	3.66606	4	5.1225	3.39411	5.36656	4.30813	7.33212	1.78885	4.07922	6.8352	2.88444	6.6453	4.07922	3.2	4
5.6	5.6	6.44981	3.91918	3.29848	5.18459	4.07922	5.3066	3.29848	2.6533	4	3.48712	2.26274	4.8	6.59697	2.88444	5.76888	3.91918	4.38178	4.07922
5.1225	2.99333	6.09262	2.52982	3.39411	3.57771	4.30813	5.18459	4.59565	5.36656	3.91918	6.8352	3.29848	5.24595	6.8352	2.6533	5.76888	3.29848	4.73286	6.78823
5.36656	5.6	2.4	2.4	3.29848	2.4	4.59565	5.65685	5.05964	2.88444	4	7.28835	4.8	5.65685	6.8352	4	3.29848	3.29848	5.3066	4.38178
5.42586	5.82409	1.95959	4.07922	3.29848	2.26274	4.38178	5.71314	3.39411	5.18459	7.2	7.37564	2.26274	5.87878	6.44981	2.26274	4.07922	3.29848	3.29848	4.30813
5.18459	2.99333	6.49923	2.52982	3.29848	2.4	4.59565	5.76888	3.29848	5.1225	4.15692	3.66606	1.78885	5.65685	6.44981	4.30813	7.01997	2.99333	3.66606	6.78823
5.42586	6.09262	6.14492	2.52982	3.29848	1.78885	2.88444	5.76888	2.99333	2.88444	4	7.41889	1.13137	5.18459	6.97424	1.95959	7.33212	4.30813	3.29848	4
5.42586	5.98665	1.78885	2.4	3.29848	1.38564	2.99333	5.82409	3.2	4.93153	4	7.28835	3.29848	5.36656	6.88186	4	7.54718	4.15692	3.66606	7.63151
5.18459	5.82409	1.78885	4.15692	3.57771	1.13137	3.57771	5.82409	2.88444	2.26274	3.91918	4	3.39411	5.36656	6.9282	1.78885	6.69328	4.07922	4.73286	4.30813
5.6	2.99333	6.44981	2.4	3.39411	2.4	4	5.82409	2.52982	4.8	4	6.88186	4.8	5.36656	6.97424	1.95959	6.78823	3.29848	4.86621	7.75629
5.1225	6.2482	6.09262	2.4	3.39411	2.99333	4.07922	6.14492	2.88444	2.26274	7.06541	7.2	1.6	5.3066	6.6453	1.78885	6.6453	4.59565	4.93153	4.07922
5.36656	2.99333	1.78885	1.13137	3.39411	3.2	4.30813	6.2482	2.4	4.59565	4	7.41889	3.66606	5.05964	6.78823	4	6.59697	4.07922	6.44981	7.75629
5.1225	5.98665	6.03987	4.07922	3.39411	3.57771	4.66476	6.29921	0.8	2.6533	3.57771	7.2	5.1225	5.05964	6.88186	1.78885	6.6453	4.07922	6.6453	4.66476
5.3066	3.29848	6.29921	2.52982	3.39411	4.07922	4.8	6.44981	2.52982	4.59565	3.57771	6.97424	1.78885	4.93153	6.78823	4	6.8352	2.99333	5.1225	7.83837
4.93153	6.29921	6.2482	1.13137	3.48712	5.42586	4.38178	6.44981	2.4	4.52548	4.07922	4	1.95959	4.93153	6.78823	3.91918	6.8352	2.99333	4.8	4.30813
5.36656	6.14492	5.76888	4.38178	3.57771	5.05964	5.82409	6.4	2.4	2.26274	7.2	7.28835	1.78885	4.66476	6.8352	3.29848	6.88186	4.59565	5.05964	7.24431
5.18459	6.09262	5.76888	2.52982	3.66606	3.91918	4.30813	6.44981	2.26274	4.38178	7.71492	4.30813	2.26274	4.59565	6.97424	3.57771	3.57771	3.57771	4.86621	4.07922
5.1225	3.29848	5.36656	2.4	3.29848	3.91918	4.73286	6.49923	2.88444	4.59565	7.54718	6.88186	2.4	4.73286	6.09262	3.57771	4.15692	4	4.93153	7.24431
5.1225	6.44981	5.6	1.13137	4	3.66606	4.86621	6.4	2.6533	2.4	4	4.73286	2.4	4.8	6.14492	3.57771	7.58947	4	4.93153	4.30813
5.18459	6.44981	6.03987	4.59565	4	2.26274	4.93153	6.4	3.29848	4.30813	3.57771	6.88186	3.91918	4.73286	6.29921	2.99333	7.58947	2.99333	5.1225	7.24431
5.1225	6.44981	5.71314	2.4	4	1.78885	5.05964	6.4	2.99333	2.26274	4.38178	6.88186	3.91918	4.8	6.88186	3.29848	7.58947	2.99333	4.93153	4.38178
5.1225	6.44981	5.36656	1.13137	3.39411	3.2	5.1225	6.4	3.29848	4.30813	7.54718	6.88186	3.57771	4	6.8352	3.39411	7.54718	4.30813	7.41889	6.6453
4.93153	3.29848	4.93153	5.1225	4	3.29848	5.05964	6.44981	3.29848	2.52982	7.58947	5.1225	4.93153	4.73286	6.59697	3.66606	7.33212	3.75233	7.06541	4.30813
4.93153	3.29848	4.30813	2.4	4	3.29848	4.86621	6.59697	3.29848	4.07922	4	6.88186	2.88444	4.59565	6.09262	3.57771	3.29848	4.07922	6.69328	6.6453
5.1225	6.88186	4.73286	2.4	3.91918	4.38178	4.86621	6.29921	4.93153	4.07922	3.91918	4.07922	2.52982	4.52548	6.49923	3.39411	4.30813	2.4	5.65685	4.07922
4.93153	3.39411	5.1225	1.13137	4	4	4.66476	6.44981	4.66476	2.26274	4.07922	4	2.52982	4.52548	6.59697	3.29848	5.3066	2.77128	5.42586	6.09262
5.1225	7.37564	5.1225	4.52548	3.2	4.59565	4.8	6.14492	4.8	4.07922	4	4.07922	3.66606	5.1225	6.49923	3.2	5.82409	4.07922	7.2	4
4.73286	2.88444	4.30813	4.8	3.2	5.1225	5.87878	6.59697	4.73286	2.26274	4	4.38178	4	4.93153	6.44981	3.29848	7.15542	3.75233	5.3066	6.44981
5.18459	3.39411	4.38178	4.93153	4	5.42586	5.6	6.59697	4.30813	4	4.30813	4.30813	4.07922	5.3066	6.4	3.57771	7.06541	2.6533	5.3066	6.54828
5.36656	7.71492	4.73286	2.26274	4	5.82409	5.6	6.49923	4.07922	2.26274	8	6.8352	4.93153	5.42586	5.76888	3.66606	6.9282	4.30813	7.41889	4.07922
5.18459	2.88444	4.59565	1.38564	4	4	5.76888	6.49923	4	4	7.87909	6.78823	2.88444	5.3066	5.76888	3.57771	6.88186	3.57771	7.41889	6.2482
5.1225	7.41889	5.1225	3.75233	4	3.2	5.82409	6.49923	4	2.26274	4.07922	6.29921	2.99333	5.42586	5.82409	3.29848	2.99333	2.6533	7.01997	3.91918
5.18459	7.9599	4.59565	4	4	2.99333	5.3066	6.29921	2.99333	2.26274	4	5.98665	2.99333	5.98665	5.82409	3.39411	4.8	2.99333	7.2	6.2482
5.05964	3.29848	5.05964	4.38178	3.66606	3.29848	5.1225	5.87878	2.99333	4	4	2.99333	2.99333	5.98665	5.82409	3.66606	5.36656	4.30813	7.01997	6.14492
4.66476	7.71492	4.93153	2.4	4.07922	4	5.3066	5.82409	2.99333	2.4	4.30813	3.29848	3.29848	5.82409	5.82409	3.91918	5.87878	3.48712	6.6453	3.91918
5.1225	7.87909	5.05964	2.52982	4.15692	4.59565	4.93153	5.6	3.2	4.07922	7.41889	3.39411	3.66606	6.44981	5.71314	3.91918	6.44981	3.29848	6.44981	5.6
5.1225	7.9196	4.66476	1.6	4.07922	6.09262	4.73286	5.98665	2.6533	4	7.33212	3.29848	3.91918	6.29921	5.65685	3.29848	6.14492	3.29848	6.44981	4.38178
5.18459	2.99333	5.18459	2.88444	4	4	4.86621	5.3066	2.99333	2.26274	7.2	3.29848	5.24595	6.4	5.65685	3.57771	6.54828	2.77128	5.71314	5.1225
5.18459	7.9196	4.59565	3.2	4.07922	3.91918	4.30813	5.87878	2.6533	2.26274	7.87909	3.29848	2.99333	6.4	5.65685	3.66606	6.54828	4.30813	5.6	5.65685
5.36656	2.99333	5.36656	3.2	4.30813	3.66606	4.59565	4.8	2.6533	4.30813	7.63151	3.39411	3.57771	6.88186	5.65685	3.39411	6.78823	3.66606	5.05964	4.30813
5.05964	7.9196	4.93153	4.07922	4.15692	2.99333	4.66476	5.87878	2.6533	3.91918	4	3.29848	3.29848	6.6453	5.1225	3.91918	6.78823	3.29848	7.28835	5.1225
5.36656	7.87909	5.36656	4.07922	4	2.99333	4.66476	4.30813	2.88444	2.26274	4	3.57771	5.24595	7.01997	5.05964	4	6.78823	2.77128	5.65685	4.38178
4.66476	2.99333	5.05964	2.26274	4	3.57771	4.38178	3.66606	2.88444	1.95959	4.15692	3.66606	2.4	6.09262	5.1225	4.07922	2.99333	3.91918	5.71314	5.1225
5.1225	7.9196	5.36656	1.78885	4.07922	3.39411	4.38178	3.29848	2.88444	4.38178	4.07922	6.54828	3.39411	7.24431	5.3066	4	5.05964	3.66606	5.82409	4.59565
5.1225	8.19756	5.05964	2.6533	4.30813	2.99333	4.07922	5.05964	0.8	4.38178	4	2.88444	3.29848	6.8352	5.18459	4	6.14492	2.77128	5.6	5.1225
4.93153	2.99333	4.66476	2.6533	4.30813	4.30813	4.8	5.65685	1.78885	2.26274	4.66476	3.48712	5.1225	7.06541	5.1225	4	5.82409	4.30813	5.87878	4
5.05964	8.19756	5.05964	3.66606	4	4.38178	4.59565	4.66476	0.8	4.52548	7.28835	2.99333	3.48712	6.8352	5.1225	4	6.14492	3.29848	1.6	4.93153
4.86621	2.77128	5.1225	2.4	4	5.76888	4.59565	4.30813	1.13137	1.6	7.06541	3.29848	2.77128	7.54718	5.1225	4	6.29921	3.66606	1.6	4.59565
4.93153	7.33212	4.66476	2.26274	4	5.6	4.66476	4.59565	0.8	2.26274	4.07922	2.99333	3.57771	7.58947	5.1225	3.39411	5.98665	3.48712	1.6	5.1225
4.93153	2.99333	4.66476	1.95959	4.07922	4.30813	4.52548	5.1225	0.8	1.78885	5.1225	2.99333	3.39411	7.41889	5.36656	3.57771	6.29921	2.4	4.07922	4.52548
4.93153	6.44981	4.07922	2.52982	4	3.57771	4.93153	5.1225	1.78885	4.30813	6.88186	3.48712	3.66606	6.59697	5.36656	4	6.14492	2.77128	7.28835	5.24595
4.73286	6.6453	4.30813	2.6533	4.07922	3.2	4.59565	4.73286	0.8	4.59565	7.2	6.2482	3.39411	7.2	5.36656	4.07922	6.44981	4.59565	7.54718	5.1225
4.73286	2.99333	4.07922	3.39411	4	3.2	4.66476	4.93153	1.13137	1.78885	6.8352	6.49923	5.18459	7.63151	5.1225	4.15692	6.44981	3.66606	7.01997	4.38178
1.6	6.2482	3.91918	2.26274	4	3.29848	4.73286	4.93153	0.8	4.38178	6.9282	6.29921	4.30813	7.9196	5.1225	4.07922	6.29921	2.4	5.36656	5.1225
1.6	2.99333	4	2.6533	4.30813	3.39411	4.52548	5.18459	1.95959	4.59565	6.6453	3.91918	4	8.2365	5.1225	4.07922	6.44981	4.30813	5.65685	4.66476
2.26274	5.87878	3.91918	2.4	4	3.48712	4.52548	4.8	2.26274	4.30813	3.57771	4	3.39411	8.19756	5.1225	4	6.44981	3.91918	5.42586	5.05964
2.4	5.87878		2.4	4.07922	2.77128	4.52548	4.8	4.38178	3.29848	4	4	2.99333	8.15843	5.65685	4.30813	6.44981	4	5.18459	4.59565
3.39411	2.88444		2.6533	4.15692	4.38178	1.6	4.8	1.6	1.95959	4	4	3.91918	8.35225	5.65685	3.57771	6.44981	3.29848	6.09262	4.52548
3.39411	3.39411		3.29848	4.59565	5.87878	1.78885	4.59565	1.6	4.38178	4.07922	4	3.91918	8.19756	6.14492	4.30813	6.44981	3.39411	2.26274	3.39411
3.39411	2.88444		2.99333	4	4.86621	1.78885	4.52548	2.99333	4.15692	4.07922	4	3.66606	7.9599	5.36656	4	6.29921	2.6533	2.26274	4.66476
4.86621	3.29848		2.4	4.15692	3.48712	4.52548	4.52548	2.6533	3.48712	4.07922	4	4.8	8.19756	5.1225	4.07922	6.2482	2.6533	1.78885	5.05964
5.05964	3.29848		2.88444	3.91918	3.39411	2.4	4.38178	2.52982	3.66606	3.57771	3.91918	4.38178	8.0399	5.1225	4	6.14492	4.07922	4.38178	4.73286
1.6	3.39411		2.99333	4.73286	3.57771	4.30813	4.59565	2.4	1.78885	5.1225	3.66606	3.91918	7.9196	5.1225	4	2.6533	3.29848	7.2	2.88444
2.88444	1.6		2.4	4.93153	3.66606	4.73286	4.93153	2.4	4.86621	5.1225	3.91918	3.57771	7.83837	4.73286	3.57771	1.78885	2.77128	5.1225	4.59565
2.88444	1.78885		2.26274	4.66476	2.26274	2.52982	4.73286	2.4	4.38178	6.44981	4.15692	3.66606	7.33212	5.1225	4	1.95959	4	5.24595	4.93153
3.2	1.95959		2.52982	5.18459	4.30813	3.39411	5.05964	2.4	4.30813	6.88186	4.30813	3.57771	7.2	4.59565	3.29848	4.86621	2.88444	5.6	4.30813
3.29848	1.78885		2.52982	5.36656	4	3.66606	2.88444	2.26274	4.30813	7.01997	4	5.05964	7.01997	4.38178	3.29848	5.1225	3.29848	5.65685	5.05964
3.66606	2.26274		3.29848	5.6	5.71314	4.59565	2.88444	1.78885	4.07922	6.88186	4	4.38178	6.88186	4.73286	3.2	4.93153	2.88444	5.76888	4.86621
3.91918	3.48712		2.88444	5.6	5.6	4	3.29848	1.6	1.78885	7.01997	4	4.59565	7.06541	4.8	3.91918	5.82409	2.6533	2.6533	2.26274
4	2.4		3.29848	5.3066	5.36656	3.75233	5.36656	3.2	4.86621	6.78823	3.39411	4.73286	6.6453	4.8	3.2	5.87878	2.77128	2.4	4.8
4.07922	2.99333		2.6533	5.42586	2.99333	3.66606	2.88444	2.88444	4.8	6.2482	3.39411	4.30813	6.44981	5.6	3.66606	6.14492	4.30813	4.07922	4.59565
4.30813	3.39411		2.4	6.03987	3.29848	3.48712	3.2	2.99333	1.38564	4	2.88444	4.38178	6.09262	4.52548	3.2	2.6533	2.99333	6.8352	4.73286
4.86621	3.39411		2.52982	6.14492	3.39411	2.88444	3.29848	2.77128	5.3066	5.36656	3.2	4.59565	5.82409	4.52548	3.91918	2.99333	2.6533	6.9282	4.59565
4.73286	2.99333		3.39411	6.2482	3.29848	1.6	3.29848	2.4	5.3066	4.93153	2.99333	4.59565	5.87878	2.4	2.4	3.2	2.77128	5.24595	4.30813
5.1225	3.29848		2.88444	6.29921	3.75233	2.6533	3.2	2.26274	5.24595	5.05964	2.99333	4.59565	5.82409	2.52982	3.66606	4.52548	2.6533	5.6	4.30813
4.59565	3.29848		2.6533	6.14492	1.78885	2.99333	3.2	2.88444	5.65685	5.36656	3.29848	4.30813	5.65685	2.88444	3.2	4.59565	2.6533	5.71314	4.07922
4.66476	3.48712		2.99333	6.49923	4	1.38564	2.99333	1.78885	5.6	5.36656	2.88444	4.38178	5.6	3.66606	3.2	4.66476	2.6533	5.82409	5.18459
4.86621	3.57771		2.52982	7.15542	6.09262	2.99333	3.29848	0.8	5.6	5.76888	2.99333	4.59565	6.4	4	3.91918	4.59565	4.30813	5.98665	1.6
4.73286	3.66606		2.88444	7.15542	6.09262	1.38564	3.29848	2.4	5.18459	5.82409	2.99333	4.30813	6.29921	4.07922	2.6533	4.30813	2.99333	5.87878	4.93153
4.38178	3.66606		2.88444	7.15542	5.1225	2.6533	3.39411	3.2	5.36656	6.44981	2.6533	4.59565	6.29921	4.15692	3.57771	4.38178	2.6533	5.82409	4.30813
4.52548	3.48712		3.48712	7.33212	5.05964	1.78885	3.29848	2.99333	5.1225	4.38178	3.29848	4.66476	5.98665	4.52548	3.29848	4.15692	2.6533	2.88444	4.07922
4.30813	3.39411		2.88444	7.9196	3.29848	2.4	3.29848	2.99333	5.6	5.42586	3.39411	4.8	5.87878	4	3.2	4.66476	2.77128	2.88444	4.30813
4.30813	3.29848		2.6533	7.71492	3.29848	1.95959	2.99333	3.29848	5.87878	5.1225	2.99333	4.8	6.29921	1.13137	3.2	5.1225	2.99333	4.30813	4.30813
4.07922	2.99333		2.88444	7.54718	3.29848	2.77128	3.29848	4.86621	6.03987	5.36656	3.29848	4.93153	6.29921	1.38564	3.2	5.6	2.88444	6.54828	4.30813
3.57771	3.48712		2.4	7.33212	3.29848	2.88444	2.99333	2.4	5.82409	4.52548	3.29848	4.93153	6.29921	1.6	4	5.36656	4	6.44981	4.30813
4	3.29848		2.52982	6.9282	3.29848	2.99333	3.29848	2.4	5.36656	6.03987	2.99333	5.3066	2.26274	1.6	4	5.76888	2.99333	6.29921	5.18459
3.57771	3.29848		2.52982	6.88186	4	2.99333	3.29848	2.4	4.86621	6.09262	3.39411	5.65685	6.49923	1.95959	4	5.82409	2.88444	5.98665	1.38564
3.66606	3.39411		2.4	6.78823	4	2.88444	3.48712	2.4	4.66476	5.65685	6.29921	5.42586	6.49923	3.29848	4.30813	5.71314	2.88444	6.29921	4.59565
3.75233	3.39411		3.48712	6.2482	4	2.99333	3.29848	2.52982	4.38178	5.05964	3.39411	5.6	1.78885	4	4.07922	5.6	2.99333	5.82409	3.91918
1.38564	3.48712		3.57771	7.01997	1.78885	2.99333	3.48712	2.88444	4.30813	4.93153	3.39411	5.6	6.44981	4.07922	4	2.77128	4	5.87878	4
3.2	2.88444		3.66606	5.6	4	2.99333	3.29848	2.26274	3.57771	4.73286	3.39411	5.98665	6.6453	3.57771	4	4	2.99333	3.29848	4.07922
3.2	3.29848		3.29848	5.18459	5.65685	2.52982	3.39411	2.6533	5.65685	4.66476	3.57771	5.87878	6.44981	4	4	3.91918	2.6533	3.29848	4.07922
2.99333	3.29848		3.39411	6.54828	4.86621	2.6533	3.48712	2.6533	5.54256	4.93153	3.66606	5.98665	1.78885	4	4.8	4.59565	2.52982	4	4.07922
1.13137	3.57771		2.88444	4.30813	3.48712	2.88444	3.75233	2.4	5.98665	4.66476	3.91918	5.6	6.59697	4.07922	4.8	4.73286	2.88444	6.29921	4.07922
1.38564	3.57771		2.88444	6.2482	3.39411	3.29848	3.57771	2.26274	5.76888	4.15692	4	5.6	1.78885	1.6	4.59565	4.30813	2.99333	6.09262	4.15692
2.26274	3.75233		2.99333	3.57771	3.48712	3.57771	3.57771	1.6	5.71314	6.6453	4	5.6	6.6453	1.6	4.38178	4.59565	2.99333	3.66606	4.59565
2.4	3.91918		2.26274	5.87878	3.39411	3.57771	3.57771	0.8	5.6	5.65685	4	5.6	6.44981	1.6	4.30813	4.93153	3.29848	3.66606	4.73286
1.6	3.66606		2.52982	2.6533	4.30813	4	3.29848	2.52982	3.29848	5.71314	3.29848	6.2482	1.95959	1.6	4.15692	5.18459	2.99333	5.71314	4.93153
	3.39411		2.52982	2.52982	1.78885	3.39411	3.2	2.77128	3.2	5.3066	3.29848	5.6	6.88186	1.6	4.8	5.24595	2.99333	5.76888	5.05964
	2.99333		3.57771	5.42586	4	3.91918	3.48712	3.39411	2.99333	3.91918	3.39411	4.8	1.78885	1.6	4.8	5.36656	2.77128	6.59697	4.52548
	3.29848		2.52982	2.26274	5.6	4	3.39411	4	2.99333	4.38178	3.48712	4.8	6.88186	2.4	4.59565	4.93153	4.30813	6.44981	4.59565
	3.29848		2.88444	1.78885	4	3.29848	3.29848	3.91918	5.54256	6.29921	3.29848	5.6	2.26274	1.6	4.30813	5.36656	2.88444	3.91918	4.66476
	3.66606		2.88444	5.18459	3.91918	3.66606	3.29848	3.39411	5.87878	4.30813	3.39411	5.6	2.26274	1.6	4.07922	5.1225	2.52982	3.66606	4.30813
	3.29848		3.29848	1.78885	4.30813	3.29848	3.48712	2.99333	5.87878	4.30813	2.99333	4.8	6.6453	1.6	4.8	5.65685	2.88444	3.91918	4.30813
	3.39411		2.4	4.93153	4.30813	3.66606	3.39411	3.29848	5.65685	5.65685	3.2	5.42586	2.4	1.78885	4.73286	5.36656	2.99333	5.6	4.30813
	3.57771		2.52982	1.6	4.30813	3.39411	3.39411	3.29848	5.82409	4.52548	3.29848	5.42586	7.2	2.26274	4.8	5.18459	3.29848	5.36656	4.07922
	3.29848		4.30813	4.8	3.91918	3.29848	4	3.29848	5.6	5.42586	2.6533	5.1225	2.6533	2.4	4.8	5.1225	3.29848	5.3066	4
	3.39411		2.52982	1.6	6.4	3.66606	4	3.29848	5.36656	4.38178	2.99333	4.93153	7.06541	2.6533	4.73286	5.6	3.29848	6.88186	4
	3.29848		2.88444	4.59565	3.91918	3.91918	4	4.73286	5.6	4.38178	2.99333	5.1225	6.8352	3.91918	4.8	5.1225	3.29848	4.59565	3.57771
	3.29848		2.99333	1.6	4.30813	3.66606	5.82409	3.2	5.98665	5.3066	2.88444	5.05964	2.88444	5.24595	4.59565	2.6533	3.29848	4.30813	3.29848
	3.29848		3.2	4.30813	3.48712	4	2.88444	2.88444	5.24595	1.78885	5.71314	5.05964	7.15542	2.99333	4.30813	4.93153	2.99333	5.71314	3.29848
	2.77128		2.26274	1.6	7.2	4	3.29848	1.95959	5.24595	4.52548	3.39411	5.05964	3.29848	3.29848	4	4.30813	2.6533	5.82409	3.91918
	2.88444		2.6533	4.07922	4.07922	4.07922	3.39411	2.88444	5.87878	4.86621	3.39411	5.3066	7.41889	3.39411	4.59565	4	4.52548	7.01997	4
	2.88444		4.52548	1.6	3.48712	4.07922	3.29848	2.77128	4.73286	1.78885	3.2	5.1225	3.29848	4.52548	4	4.07922	3.2	6.8352	3.39411
	2.88444		2.4	1.6	6.29921	3.91918	3.48712	2.6533	5.18459	4.38178	2.88444	5.36656	2.88444	2.26274	4.30813	4.15692	2.99333	5.05964	3.39411
	2.88444		2.6533	3.66606	6.44981	3.91918	3.66606	2.88444	5.87878	4.93153	5.36656	4.8	7.54718	4.52548	3.66606	4.59565	2.99333	5.1225	4
	2.6533		3.2	1.6	3.57771	3.66606	3.57771	3.29848	5.65685	1.78885	5.36656	4.8	3.39411	2.4	3.39411	4.93153	4.30813	4.59565	3.66606
	2.99333		3.2	3.39411	3.48712		3.57771	3.2	5.87878	1.78885	3.39411	5.71314	3.57771	2.4	4.07922	5.36656	4.30813	4.59565	3.48712
	2.88444		3.39411	1.6	5.82409		3.57771	4.59565	4.8	1.78885	3.39411	4.07922	3.29848	2.4	3.57771	2.4	3.91918	4.59565	3.39411
	3.29848		2.52982	2.99333	6.2482		3.57771	2.4	4.59565	2.26274	2.88444	4	3.29848	2.4	4	4.07922	4	5.65685	3.66606
	3.39411		4.73286	1.78885	2.99333		3.66606	2.52982	6.14492	2.88444	5.1225	5.76888	3.2	2.52982	3.39411	3.57771	3.91918	7.01997	3.2
	3.75233		2.52982	2.99333	2.99333		4	2.26274	5.98665	3.39411	5.05964	3.75233	3.2	2.99333	4	3.57771	3.39411	5.3066	3.29848
	3.57771		3.2	1.6	2.88444		4	2.26274	5.1225	4.30813	5.18459	3.75233	3.2	2.88444	3.39411	3.57771	4.07922	5.36656	3.57771
	3.57771		3.29848	2.77128	3.48712		4.52548	1.78885	5.1225	4.30813	4.93153	3.48712	7.54718	4	3.57771	3.57771	4.30813	4.59565	3.57771
	4		3.39411	1.95959	5.76888		4.59565	4.59565	5.1225	1.6	3.29848	3.29848	3.66606	5.65685	3.48712	3.57771	4	5.6	3.48712
	3.66606		3.39411	2.77128	5.42586		4.73286	1.95959	5.98665	2.26274	3.29848	2.99333	6.88186	5.1225	4.30813	3.39411	4.30813	5.65685	3.39411
	3.48712		3.57771	1.6	5.24595		5.36656	2.52982	5.76888	1.78885	3.2	2.77128	4.07922	4.59565	2.88444	4.93153	4.52548	6.8352	3.48712
	3.39411		3.66606	2.77128	4.93153		5.98665	4.66476	6.14492	1.78885	2.99333	3.75233	3.91918	5.05964	3.66606	2.52982	4.30813	5.87878	3.48712
	2.99333		3.39411	1.78885	2.52982		6.44981	1.78885	6.09262	4.30813	5.1225	5.42586	3.66606	4.30813	3.39411	3.91918	4.59565	6.03987	3.29848
	3.39411		3.48712	2.88444	2.4		6.14492	1.95959	6.59697	3.91918	3.29848	3.57771	6.78823	3.57771	3.57771	3.91918	3.29848	4.93153	3.57771
	2.99333		2.88444	1.78885	3.29848		6.03987	2.26274	6.6453	4.52548	2.99333	3.91918	4.07922	3.57771	2.26274	3.29848	5.05964	5.6	3.57771
	3.29848		4.66476	1.95959	3.29848		6.14492	2.4	6.88186	1.95959	2.99333	3.91918	4	4.59565	2.99333	3.2	4.93153	6.8352	3.66606
	3.39411		4.8	2.77128	3.29848		5.82409	2.6533	7.01997	4.30813	4.93153	3.75233	7.15542	5.05964	3.39411	3.29848	4.38178	6.78823	3.29848
	3.39411		4.8	1.78885	4.73286		5.36656	4.66476	6.8352	4.30813	4.86621	2.77128	7.15542	4.86621	3.39411	5.05964	4.38178	6.09262	2.26274
	2.99333		3.91918	2.77128	5.05964		5.05964	2.99333	6.44981	3.91918	2.88444	3.48712	7.01997	4.8	2.99333	2.88444	3.29848	5.42586	2.26274
	2.99333		3.91918	1.6	2.26274		4.30813	2.88444	6.2482	3.29848	2.88444	5.6	7.15542	2.77128	1.95959	2.99333	3.66606	5.1225	2.88444
	3.29848		3.91918	2.6533	2.26274		4.07922	4.66476	6.78823	3.29848	2.99333	2.88444	6.44981	2.6533	2.4	3.2	3.66606	7.15542	3.29848
	2.88444		4	1.78885	3.48712		4.59565	2.6533	6.49923	2.4	2.99333	2.99333	5.98665	2.52982	2.26274	2.4	3.39411	4.15692	3.39411
	3.39411		4	2.6533	3.66606		4.07922	2.99333	6.29921	2.26274	4.30813	5.71314	6.14492	2.4	2.26274	4.07922	4.8	4.93153	3.57771
	3.29848		4.07922	1.38564	3.29848		4	2.77128	6.6453	2.4	4.59565	3.2	6.29921	2.88444	2.99333	2.52982	4.59565	5.71314	3.57771
	3.29848		4.38178	2.77128	4.93153		4.30813	2.99333	6.44981	2.26274	4.73286	4.73286	5.87878	3.39411	3.2	2.6533	3.66606	3.66606	3.29848
	3.29848		4.30813	1.78885	4.07922		4.07922	5.1225	6.44981	1.78885	4.66476	2.52982	5.6	3.29848	1.95959	4.93153	3.57771	1.13137	3.48712
	3.2		2.88444	2.88444	2.26274		3.66606	2.52982	5.65685	1.6	2.88444	4.38178	4.93153	3.29848	1.95959	2.52982	3.57771	0.8	2.99333
	2.88444		4.66476	1.6	3.91918		4	2.88444	5.87878	4.30813	2.99333	2.88444	4.52548	3.2	3.2	2.4	4.30813	1.13137	3.29848
	3.29848		4.73286	2.88444	3.75233		3.39411	4.93153	5.65685	1.78885	4.59565	4.38178	6.8352	2.88444	2.88444	2.4	4.52548	1.13137	2.88444
	3.29848		4.73286	1.78885	3.75233		3.29848	1.78885	5.1225	4.07922	4.52548	2.6533	6.09262	3.29848	2.6533	2.26274	5.1225	5.6	2.6533
	3.29848		5.1225	3.29848	3.48712		3.29848	1.95959	5.18459	4	2.6533	4.07922	6.14492	3.2	2.88444	1.6	5.1225	5.1225	2.88444
	3.39411		4.73286	1.78885	3.29848		3.39411	2.99333	4.73286	1.78885	2.88444	1.78885	5.65685	3.2	2.6533	4	5.6	5.42586	2.99333
	3.29848		4.93153	3.29848	5.24595		3.48712	5.3066	5.1225	3.91918	3.66606	2.4	5.18459	2.99333	2.6533	4.38178	5.6	7.58947	2.88444
	2.99333		4.66476	1.6	3.39411		3.75233	1.78885	5.36656	4	4	4.15692	5.36656	3.29848	2.88444	1.6	4.93153	3.29848	2.88444
	2.99333		4.93153	3.39411	3.29848		3.91918	1.78885	5.1225	4.07922	4.38178	1.78885	5.54256	2.26274	2.52982	1.78885	3.66606	1.78885	2.99333
	2.99333		4.59565	1.6	3.2		3.75233	2.26274	4.07922	3.91918	4.73286	4.38178	5.36656	2.26274		2.26274	4.07922	2.26274	2.77128
	2.99333		4.8	3.66606	3.2		4.07922	2.26274	4.30813	3.66606	2.88444	2.26274	5.1225	2.26274		2.4	4	5.3066	2.6533
	2.99333		5.1225	1.38564	3.2		3.75233	2.26274	4.59565	3.2	4	4.73286	4.30813	2.4		2.26274	4.07922	5.6	2.6533
	2.6533		2.6533	3.57771	2.26274		4.07922	2.26274	4.66476	2.99333	4.30813	1.95959	7.2	2.52982		1.78885	4.52548	7.15542	2.6533
	2.88444		4.30813	1.13137	3.29848		4.30813	3.29848		3.2	4.66476	4.86621	5.98665	2.52982		1.95959	4.38178	5.6	2.52982
			4.59565	3.39411	4.93153		4.30813	4.73286		2.88444	2.26274	2.52982	6.14492	2.88444		3.66606	2.6533	7.15542	2.4
			4.38178	1.13137	2.52982		4.30813	1.78885		3.29848	2.88444	4.30813	6.2482	2.52982		4.07922	3.48712	5.3066	2.6533
			4.59565	3.2	2.6533		4.59565	2.26274		2.26274	2.88444	2.26274	4.73286	2.6533		2.26274	3.57771	6.44981	2.4
			4.8	1.13137	2.88444		4.59565	1.95959		3.57771	4.30813	4.59565	4.59565	3.2		2.26274	3.66606	5.65685	2.4
			4.59565	3.29848	2.88444		4.59565	3.29848		1.78885	4.38178	2.52982	7.01997	3.39411		2.26274	4	6.09262	2.26274
			2.26274	1.13137	2.4		4.66476	5.36656		1.6	4.66476	4.93153	5.65685	3.29848		4	3.91918	5.05964	2.26274
			5.1225	3.57771	2.52982		4.59565	2.52982		3.66606	2.26274	2.26274	4.66476	2.88444		3.66606	4	5.71314	2.4
			2.26274	0.8	2.52982		4.59565	2.99333		1.6	2.26274	5.1225	7.15542	3.29848		1.78885	2.88444	5.1225	1.78885
			5.1225	3.39411	1.95959		4.59565	5.3066		3.75233	2.52982	2.52982	4.66476	3.2		2.26274	3.2	5.65685	2.26274
			2.26274	1.38564	1.95959		4.30813	2.6533		1.38564	4.30813	5.3066	6.8352	3.29848		2.26274	3.2	4.66476	2.4
			4.93153	3.91918	2.4		4.59565	2.99333		3.48712	4.93153	2.6533	4.30813	2.26274		1.78885	3.39411	4.8	2.6533
			5.42586	1.38564	3.29848		4.38178	2.99333		1.38564	4.93153	5.1225	6.54828	2.4		3.57771	2.26274	5.05964	2.88444
			2.26274	3.57771	4.73286		4.30813	2.88444		3.39411	4.93153	2.4	4.30813	2.88444		1.78885	2.26274	4.8	2.4
			5.1225	1.38564	2.4		4	3.29848		1.13137	4.73286	5.3066	6.14492	3.2		1.95959	2.88444	4.93153	2.6533
			5.6	3.57771	1.78885		4.52548	5.1225		3.57771	3.29848	2.88444	4.15692	3.57771		1.78885	2.88444	4.66476	2.88444
			2.26274	1.78885	1.78885		4.30813	3.57771		1.13137	3.29848	5.36656	4.15692	3.29848		1.78885	2.88444	4.86621	2.99333
			2.26274	3.29848	2.26274		3.91918	3.57771		3.29848	2.88444	2.6533	3.91918	2.88444		1.78885	2.52982	4.8	3.2
			5.65685	1.95959	2.6533		3.75233	3.57771		2.99333	2.4	5.36656	6.09262	3.29848		1.6	2.4	4.93153	3.2
			5.6	3.57771	3.29848		3.75233	5.1225		3.57771	2.4	2.6533	3.91918	3.2		2.26274	3.29848	4.66476	3.2
			1.78885	1.95959	4.30813		3.48712	3.39411		3.57771	2.4	2.6533	4.07922	3.2		1.78885	2.99333	4.59565	3.57771
			2.4	1.78885	2.26274		3.29848	3.66606		3.57771	2.52982	4.8	3.91918	3.39411		1.78885	2.26274	4.52548
			5.71314	3.29848	2.6533		2.99333	3.66606		3.57771	2.52982	4.8	6.09262	3.57771		1.78885	2.26274	4.93153
			5.76888	1.78885	3.48712		2.6533	3.39411		3.48712	4.59565	4.8	3.66606	3.29848		1.95959	2.26274	4
			5.6	3.57771	4.59565		2.99333	3.39411		3.66606	4.93153	5.05964	5.87878	2.4		2.26274	2.52982	4.59565
			5.71314	1.78885	1.78885		2.77128	5.65685		3.66606	5.1225	4.8	3.29848	3.66606		2.4	2.4	3.91918
			5.82409	3.57771	2.26274		2.99333	3.29848		3.57771	3.29848	4.8	5.6	3.39411		2.52982	2.4	4.38178
			2.4	3.29848	2.6533		2.99333	3.57771		3.57771	3.29848	4.8	5.05964	3.39411		2.4	2.99333	3.39411
			5.65685	3.57771	3.29848		2.99333	3.66606		3.91918	3.29848	4.73286	3.66606	3.29848		2.52982	2.6533	4.73286
			5.82409	3.39411	4.30813		2.99333	3.57771		3.91918	3.29848	4.8	5.05964	1.95959		2.26274	2.77128	3.2
			6.14492	3.57771	1.78885		3.29848	3.39411		3.57771	3.29848	4.59565	3.29848	1.95959		2.4	2.26274	4.38178
			5.87878	3.29848	2.26274		2.99333	3.2		3.66606	3.57771	4	5.1225	2.26274		2.52982	2.52982	2.88444
			2.52982	4	1.78885		3.29848	5.6		3.66606	3.57771	3.66606	3.66606	2.26274		2.4	2.4	4.66476
			2.52982	4	2.52982		3.29848	3.29848		4	3.29848	3.66606	4.66476	3.57771		2.4	2.26274	2.4
			5.6	4.52548	2.88444		3.39411	3.57771		4.07922	3.2	3.57771	3.29848	3.39411		2.52982	2.26274	4.30813
			6.14492	4	4.15692		3.29848	3.57771		4.38178	2.88444	3.57771	4.30813	3.66606		2.6533	2.52982	2.4
			5.98665	4.07922	2.26274		3.66606	3.48712		4.30813	2.99333	3.29848	3.29848	3.91918		2.6533	2.26274	4.38178
			5.82409	4.15692	2.26274		3.66606	5.42586		3.66606	2.88444	3.29848	4.30813	3.66606		2.4	2.52982	4.07922
			5.71314	4.07922	2.4		3.66606	3.2		4.07922	2.6533	2.6533	3.29848	3.57771		2.4	2.88444	4.30813
			5.65685	4.30813	3.29848		3.29848	3.29848		3.29848	2.6533	2.99333	3.66606	3.91918		2.26274	2.26274	4.59565
			5.65685	4.66476	2.88444		3.48712	3.66606		3.29848	2.4		3.66606	1.95959		2.26274	1.95959	4.38178
			5.65685	4.66476	3.91918		3.29848	3.48712		2.52982	2.26274		3.91918	2.4		2.4	1.78885	4.52548
			2.88444	4.30813	2.26274		3.29848	4		2.52982	2.26274		3.48712	2.26274		2.4	2.88444	4.38178
			5.82409	4.07922	1.6		3.29848	5.6		4.07922	2.52982		3.66606	3.29848		2.26274	2.6533	4.52548
			5.82409	4.30813	1.95959		3.29848	3.66606		2.26274	2.52982		3.66606	3.39411		2.26274	2.52982	4.07922
			5.82409	4.66476	2.26274		3.29848	4		4	4.59565		3.66606	3.66606		2.4	2.88444	4.30813
			5.71314	4	2.99333		3.2	4.30813		1.78885	4.93153		3.66606	3.39411		2.52982	2.88444	4
			2.6533	4.07922	2.52982		2.88444	6.14492		1.78885	2.99333		3.29848	3.29848		2.52982	3.2	4.07922
			5.82409	4.30813	3.91918		2.6533	6.2482		3.75233	2.88444		3.48712	1.95959		2.6533	2.88444	3.66606
			5.65685	4	2.26274		2.52982	6.4		1.6	3.48712		2.99333	2.26274		2.26274	2.52982	4
			5.6	4.30813	1.78885		2.52982	6.44981		3.29848	3.29848		3.66606	3.57771		2.26274	2.6533	3.57771
			5.6	4.59565	1.95959		2.52982	6.2482		3.29848	3.29848		2.52982	3.39411		2.26274	2.88444	3.39411
			6.2482	4.15692	1.95959		2.6533	6.2482		3.48712	3.2		3.66606	1.78885			2.88444	3.29848
			6.2482	4.30813	2.4		2.6533	6.44981		3.48712	2.99333		2.99333	2.26274			2.88444	2.88444
			6.29921	4.66476	2.26274		2.6533	6.78823		3.29848	3.2		3.29848	2.4			2.88444	2.99333
			6.29921	4.59565	2.88444		2.6533	6.14492		2.88444	3.29848		2.52982	2.4			2.52982	2.88444
			6.14492	4	3.57771		2.77128	6.88186		2.99333	3.29848		3.48712	3.57771			2.77128	2.88444
			6.09262	4.07922	2.26274		2.6533	6.69328		2.52982	3.57771		2.4	3.29848			2.52982	2.88444
			5.98665	3.29848	1.78885		2.88444	6.69328		2.26274	3.39411		3.29848	3.39411			2.4	2.99333
			6.03987	3.57771	2.99333		2.88444	6.6453		1.78885	2.26274		2.52982	2.4			2.6533	2.88444
			5.87878	4	2.26274		2.77128	6.09262		1.78885	5.1225		3.29848	2.52982			2.52982	2.52982
			5.71314	3.2	1.78885		2.88444	6.49923		1.6	5.1225		2.99333	2.6533			2.77128	2.6533
			5.65685	3.39411	1.78885		2.6533	6.8352		1.95959	2.99333		2.88444	2.52982			2.6533	2.88444
			5.6	3.91918	3.29848		2.6533	6.44981		1.95959	2.99333		2.26274	3.29848			2.6533	2.88444
			5.65685	3.91918	2.26274		2.99333	6.59697		2.26274	3.29848		3.29848	2.4			2.4	2.6533
			5.71314	4	2.99333		2.99333	6.09262			2.99333		2.6533	2.52982			2.26274	2.52982
			5.82409	3.66606	1.78885		2.88444	4.93153			2.99333		2.4	2.88444			1.78885	2.4
			5.65685	4	3.57771		2.6533	4.86621			2.88444		3.29848	2.88444			2.26274	2.4
			5.6	3.57771	2.88444		2.4	6.49923			2.88444		2.6533	2.52982			2.26274	2.52982
			5.6	3.2	1.78885		3.2	4.30813			3.29848		1.95959	2.52982			2.26274	2.4
			5.65685	2.88444	1.38564			4.30813			3.2		2.77128	2.4			2.4	2.6533
			5.82409	2.88444	3.57771			4.66476			2.88444		1.78885	3.29848			2.4	2.6533
			5.6	3.29848	2.52982			4.8			4.93153		2.52982	3.2			2.4	2.52982
			5.71314	0.8	1.38564			5.1225			3.2		1.95959	3.2			2.88444	2.52982
			5.76888	0.8	1.13137			4.93153			2.99333		2.4	3.2			2.6533	2.4
			5.82409	0.8	3.29848			4.86621			3.2		1.95959	3.39411			2.88444	2.26274
			5.71314	1.13137	2.4			4.86621			2.88444		1.95959	3.2			2.88444	2.26274
			5.65685	1.6	1.38564			5.65685			5.24595		1.78885	3.29848			2.6533	1.78885
			5.65685	1.78885	1.13137			3.66606			4.86621		1.95959	3.2			2.88444	1.6
			5.65685	3.29848	1.13137			3.91918			5.36656		1.78885	2.88444			2.88444	1.6
			5.65685	0.8	1.13137			4.07922					2.26274	2.88444			2.6533
			5.65685	0.8	3.2			4.07922					1.78885	2.6533			2.99333
			5.65685	3.57771	2.52982			4.07922					1.78885	2.4			3.29848
			6.14492	3.39411	2.88444			5.65685					1.78885	2.4
			6.14492	3.57771	2.6533			3.29848					1.95959	3.2
			6.03987	3.66606	2.6533			4.86621					1.78885	2.99333
			6.14492	3.91918	2.52982			4.86621					1.78885	2.99333
			6.2482	3.91918	2.4			4.86621					1.78885	2.6533
			6.2482	3.91918	2.52982			4.93153					1.78885	2.88444
			6.2482	3.2	2.26274			2.88444					1.78885	2.88444
			6.14492	3.57771	2.88444			3.29848					1.78885	2.99333
			6.2482	2.99333	1.95959			5.05964					1.78885	3.2
			6.2482	2.88444	2.99333			3.2					1.78885	3.2
			5.82409	2.99333	1.95959			2.52982					1.78885	2.99333
			5.82409	3.29848	3.29848			3.57771					1.6	2.99333
			5.76888	2.99333	1.78885			5.42586					2.26274	2.6533
			5.76888	2.88444	2.99333			2.88444					2.26274	2.52982
			5.76888	2.52982	1.6			4.07922					2.4	2.52982
			5.76888	2.99333	2.88444			5.42586					2.52982	2.4
			5.76888	2.52982	1.38564			1.78885					2.4	2.26274
			5.82409	2.26274	3.29848			4.38178					2.52982	2.4
			5.76888	2.99333	1.38564			0.8					2.88444	2.52982
			5.82409	2.4	3.29848			1.13137					2.52982	2.6533
			5.98665	1.6	1.13137			4.93153					3.2	2.6533
			5.98665	2.88444	2.99333			0.8					3.2	2.88444
			6.03987	1.6	1.13137			0.8					3.48712	2.52982
			6.29921	2.6533	2.99333			4.59565						2.99333
			6.44981	1.6	2.88444			0.8						2.99333
			6.44981	1.6	2.6533			2.26274						2.99333
			6.44981	2.52982	2.6533			2.88444						2.88444
			6.6453	1.38564	2.6533			3.57771						2.99333
			6.6453	2.4	2.6533			3.66606						2.52982
			6.44981	1.13137	2.4			4.59565						2.88444
			6.29921	1.6	2.4			0.8						2.6533
			6.2482	0.8	1.95959			1.13137						2.52982
			6.29921	1.78885				1.38564						2.4
			6.09262	1.95959				1.95959						2.88444
			6.09262	1.6				3.29848						2.6533
			6.14492	1.6				4.38178						2.52982
			5.65685	1.6				4.30813						2.4
			5.05964	1.6				3.91918						2.88444
			5.36656	1.38564				4.07922						3.2
			5.6	1.38564				4.30813						2.52982
			5.36656	1.13137				4.59565						2.88444
			5.1225	0.8				4.38178						2.99333
			5.1225	0.8				4						2.52982
			1.38564	0.8				4.07922						2.6533
			5.1225					4.07922						3.29848
			5.1225					4.38178						2.99333
			1.38564					4.59565						3.2
			5.05964					4.66476						2.52982
			1.78885					4.66476						2.6533
			4.66476					4.73286						3.2
			2.52982					4.86621						3.39411
			2.52982					5.1225						2.6533
			4.52548					5.3066						2.88444
			5.05964					4.86621						2.88444
			2.88444					4.93153						3.2
			2.99333					5.1225						2.99333
			3.2					5.1225						2.88444
			3.39411					5.3066						2.88444
			3.39411					5.05964						2.52982
			3.29848					4.66476						2.6533
			5.1225					4.93153						2.88444
			3.2					4.59565						2.88444
			3.2					4.59565						2.6533
			3.29848					4.38178						2.6533
			3.29848					4.38178						2.6533
			3.2					4.30813						2.6533
			3.29848					4.07922						2.52982
			3.39411					4.15692						2.4
			3.29848					3.91918						2.4
			3.66606											2.26274
			3.57771											1.78885
			3.39411
			3.57771
			3.29848
			5.1225
			4.07922
			4.30813
			4
			4
			4
			4
			3.66606
			5.05964
			4.8
			4.93153
			4.86621
			4.86621
			4.86621
			4.59565
			4.52548
			4.30813
			4.07922
			4
			4
			4
			3.57771
			3.29848
			5.1225
			5.1225
			5.1225
			5.1225
			5.1225
			5.18459
			5.18459
			5.1225
			5.05964
			4.66476
			4.30813
			4.52548
			4.07922
			4.07922
			4.07922
			4
			3.48712
			3.75233
			3.48712
			3.66606
			3.75233
			3.91918
			3.66606
			3.57771
			4
			3.75233
			3.66606
			3.91918
			3.66606
			3.48712
			2.99333
			2.99333
			3.29848
			2.99333
			2.6533
			3.29848
			2.6533
			2.99333
			3.29848
			2.26274
			2.77128
			2.88444
			2.99333
			2.88444
			2.26274
			2.6533
			1.13137
			1.13137
			1.38564
			1.6
			1.78885
			1.6
			1.78885

## Sheet: Y25_72set1_th
diam_42	diam_127	diam_212	diam_255	diam_170	diam_85	diam_127.1	diam_191	diam_63	diam_255.1	diam_58	diam_156	diam_235	diam_19	diam_117	diam_196	diam_98	diam_39	diam_137	diam_215	diam_255.2	diam_78	diam_176
3.18434	2.25167	6.5	3.9	4.86415	5.36004	1.3	4.68722	2.90689	1.3	4.31161	4.31161	4.68722	3.9	3.67696	3.9	2.90689	2.90689	4.11096	3.9	3.9	5.2	3.67696
3.67696	2.25167	6.5	4.31161	4.86415	5.81378	1.3	4.86415	2.90689	1.83848	4.68722	4.86415	4.68722	3.18434	3.67696	3.18434	2.90689	3.18434	4.31161	2.6	3.67696	5.36004	3.18434
3.67696	2.6	7.00071	4.11096	4.86415	5.66657	1.3	4.86415	2.90689	2.25167	4.11096	4.86415	5.51543	2.25167	3.67696	3.18434	3.18434	2.90689	4.68722	2.90689	4.11096	5.36004	3.18434
3.67696	2.25167	6.5	4.31161	4.86415	5.36004	1.3	4.86415	2.90689	2.6	2.6	4.68722	5.36004	1.83848	1.83848	3.9	3.18434	3.9	4.68722	3.67696	3.9	5.95735	3.67696
4.11096	2.25167	7.12039	4.68722	5.51543	5.66657	1.3	3.9	3.18434	2.90689	4.11096	4.31161	5.2	1.3	3.67696	3.67696	3.67696	2.90689	4.31161	3.9	3.9	5.66657	2.90689
4.11096	2.25167	7.6909	4.68722	5.36004	6.09754	1.3	3.9	2.90689	2.90689	2.90689	4.11096	4.68722	1.3	1.83848	2.90689	3.9	4.68722	4.68722	2.90689	3.9	6.36867	3.67696
5.2	2.25167	7.46793	4.68722	5.66657	5.66657	3.9	3.67696	3.18434	2.6	2.90689	5.2	4.86415	4.31161	3.18434	3.18434	4.11096	5.36004	4.31161	2.90689	3.9	7.00071	3.18434
4.86415	2.25167	8.01374	4.68722	5.66657	6.09754	3.9	2.90689	3.18434	2.6	3.9	5.2	3.9	4.31161	1.3	3.67696	4.11096	4.68722	4.50333	3.18434	3.67696	7.46793	3.9
5.51543	1.83848	7.46793	4.68722	5.36004	5.81378	4.68722	3.18434	2.90689	2.6	3.9	5.81378	4.86415	3.9	3.9	3.67696	3.9	4.68722	4.11096	3.18434	2.6	6.36867	3.67696
5.95735	2.25167	8.01374	4.86415	2.90689	5.95735	5.2	2.90689	3.18434	2.6	3.18434	5.36004	5.36004	2.90689	1.83848	4.11096	3.18434	4.86415	4.31161	3.18434	2.6	7.00071	3.67696
5.51543	2.25167	7.46793	4.68722	5.51543	6.09754	5.2	3.18434	3.18434	3.18434	3.9	5.66657	5.51543	1.83848	3.9	4.68722	3.67696	5.36004	4.31161	2.90689	4.11096	7.12039	3.67696
5.81378	2.25167	7.58024	4.86415	3.18434	6.5	5.2	3.67696	2.90689	2.90689	3.9	5.81378	5.66657	3.9	1.83848	4.68722	4.11096	4.11096	4.11096	2.90689	4.11096	7.46793	2.6
5.95735	2.90689	7.58024	4.86415	5.51543	6.09754	4.86415	3.67696	3.18434	2.25167	3.9	5.51543	5.95735	3.9	4.11096	4.68722	4.11096	4.11096	3.9	3.9	3.9	7.12039	3.18434
6.36867	2.6	7.8	4.86415	3.18434	6.5	4.86415	3.9	3.9	3.67696	3.9	6.5	5.36004	4.11096	1.3	3.67696	4.11096	4.68722	4.11096	4.11096	3.9	7.12039	2.90689
7.00071	3.18434	7.58024	5.36004	5.66657	5.81378	4.68722	4.50333	3.9	2.90689	3.9	5.51543	5.36004	3.67696	3.9	3.18434	4.31161	4.86415	3.9	3.67696	3.18434	6.36867	2.90689
7.00071	2.90689	8.01374	5.36004	5.51543	5.36004	4.68722	4.50333	3.9	3.67696	3.18434	5.81378	4.86415	3.9	1.83848	3.18434	4.31161	5.2	3.9	3.9	2.90689	5.36004	3.67696
7.12039	1.83848	7.58024	7.00071	3.18434	5.2	4.68722	4.68722	4.31161	2.6	2.90689	6.5	4.86415	3.9	3.9	2.90689	4.31161	4.86415	4.11096	4.31161	2.90689	5.36004	3.67696
7.12039	2.90689	7.00071	5.36004	6.09754	4.68722	4.31161	4.86415	4.31161	2.90689	3.9	6.62873	5.36004	3.18434	1.83848	3.9	4.31161	4.68722	3.9	3.9	2.90689	6.36867	3.18434
7.35391	1.83848	7.58024	6.5	5.51543	3.9	4.11096	4.86415	4.31161	2.6	3.9	6.36867	6.36867	3.67696	4.86415	3.67696	4.31161	6.62873	3.9	3.9	4.68722	5.51543	3.67696
8.01374	3.18434	7.8	5.51543	3.18434	3.9	3.67696	4.50333	4.68722	3.67696	3.67696	6.5	5.95735	3.9	2.6	3.67696	4.31161	6.62873	2.90689	3.67696	4.11096	5.36004	3.67696
8.32406	1.83848	8.62322	7.00071	6.5	3.67696	3.67696	4.68722	4.31161	2.6	3.18434	6.62873	5.36004	2.6	4.68722	3.9	4.86415	5.81378	3.67696	3.9	4.31161	3.67696	3.18434
8.32406	3.67696	8.22192	5.51543	3.18434	3.67696	5.51543	5.2	4.68722	3.18434	3.18434	6.62873	4.31161	3.9	2.6	3.9	4.86415	5.81378	3.67696	3.9	3.9	3.9	3.9
8.22192	2.90689	8.72067	7.35391	6.5	5.36004	5.36004	4.86415	4.31161	2.90689	4.11096	6.36867	3.9	2.6	5.2	3.9	4.86415	4.31161	3.18434	4.31161	3.9	4.68722	3.67696
9.1	2.90689	8.22192	5.51543	5.81378	5.66657	5.36004	5.2	4.31161	3.67696	3.18434	7.00071	6.36867	2.90689	2.6	3.67696	4.68722	5.81378	3.18434	4.68722	3.67696	3.9	2.90689
8.32406	3.18434	8.72067	7.00071	3.67696	5.95735	5.2	4.86415	4.50333	2.6	3.9	7.00071	5.81378	2.6	1.83848	4.86415	4.50333	4.68722	3.67696	1.3	4.68722	4.31161	3.18434
8.81703	2.6	9.19239	5.51543	1.83848	5.95735	4.68722	4.31161	4.31161	4.11096	2.90689	7.00071	3.67696	4.31161	5.51543	4.11096	5.51543	4.86415	3.67696	1.3	4.86415	4.11096	3.67696
9.1	2.90689	8.32406	7.35391	6.755	5.36004	4.31161	4.31161	3.67696	2.6	4.11096	6.755	2.6	2.6	2.6	5.66657	5.2	4.68722	3.67696	3.9	4.68722	4.11096	3.67696
8.62322	3.18434	9.1	5.51543	6.36867	5.95735	6.36867	4.86415	4.50333	3.67696	3.9	1.83848	5.81378	2.6	1.83848	5.36004	4.68722	4.11096	4.86415	1.3	4.68722	5.81378	3.9
8.32406	3.67696	8.22192	7.46793	3.67696	5.95735	6.36867	4.68722	3.9	2.6	3.9	6.62873	5.95735	2.6	5.95735	4.68722	5.36004	3.9	3.67696	1.3	4.11096	5.81378	3.9
9.1	2.90689	8.62322	6.36867	1.83848	5.66657	5.36004	4.86415	2.6	4.31161	3.9	2.6	6.09754	4.31161	2.25167	5.2	4.68722	3.9	4.68722	1.3	4.68722	5.81378	3.67696
8.32406	2.90689	9.1	6.5	7.00071	5.95735	7.35391	5.36004	3.9	2.6	4.31161	1.83848	6.09754	2.6	1.83848	6.36867	4.31161	3.9	3.18434	1.3	5.36004	3.67696	2.90689
8.72067	3.18434	9.19239	6.5	6.62873	5.36004	7.46793	5.2	2.6	3.67696	3.9	6.62873	6.09754	2.6	6.36867	5.36004	5.81378	3.67696	5.36004	5.2	4.68722	3.9	2.90689
8.62322	3.18434	8.22192	6.5	6.36867	5.36004	6.5	5.2	2.90689	2.90689	4.68722	2.6	2.90689	2.6	2.25167	6.36867	4.86415	5.81378	3.18434	1.3	5.36004	3.67696	3.9
9.55301	2.90689	2.25167	6.36867	6.5	5.66657	7.6909	4.68722	4.68722	4.11096	3.9	2.6	3.18434	4.11096	2.6	5.95735	4.31161	7.12039	5.36004	5.36004	5.2	6.62873	3.9
9.19239	2.90689	8.62322	7.46793	2.90689	5.51543	8.22192	4.68722	3.18434	2.90689	4.31161	6.755	3.67696	2.6	5.81378	6.5	5.81378	7.6909	3.67696	1.83848	3.9	2.90689	3.18434
9.98549	2.90689	1.83848	6.36867	6.62873	5.51543	7.46793	4.86415	1.3	2.90689	3.9	2.6	1.3	2.90689	2.6	6.5	4.86415	7.12039	4.68722	5.81378	4.31161	2.90689	3.67696
9.28386	2.90689	8.72067	7.00071	7.00071	7.46793	8.32406	4.68722	1.3	2.90689	4.68722	2.90689	5.95735	2.90689	2.90689	6.36867	4.68722	7.00071	3.18434	2.6	4.68722	3.18434	3.67696
9.55301	2.90689	2.25167	6.36867	1.83848	7.12039	8.32406	4.86415	4.86415	4.11096	3.9	7.00071	5.95735	2.6	5.36004	5.36004	5.81378	6.5	5.2	5.95735	5.2	3.67696	3.9
10.1533	2.90689	7.90759	7.00071	6.62873	7.00071	8.42496	4.31161	3.18434	2.90689	4.31161	2.6	2.6	4.31161	2.25167	5.36004	4.68722	6.5	3.67696	6.36867	5.51543	7.46793	2.90689
5.2	2.6	2.25167	6.36867	3.18434	5.81378	8.01374	4.68722	2.90689	3.67696	3.9	2.6	3.18434	2.90689	3.67696	5.36004	4.86415	6.5	5.81378	6.62873	5.51543	8.01374	4.50333
5.36004	3.18434	8.22192	6.5	7.00071	5.81378	8.52467	4.86415	3.18434	2.90689	3.9	7.00071	2.90689	3.18434	6.36867	4.86415	5.81378	6.5	3.67696	6.755	5.36004	8.01374	4.50333
5.66657	2.6	2.25167	6.36867	6.755	5.81378	8.42496	4.31161	1.3	4.11096	3.9	2.90689	1.3	3.67696	2.6	3.18434	4.86415	6.5	5.95735	6.36867	6.36867	8.22192	3.18434
10.1533	2.90689	8.32406	6.62873	6.5	8.32406	8.32406	4.86415	1.3	3.67696	3.9	2.6	5.36004	3.18434	3.9	2.90689	4.86415	5.51543	2.90689	6.62873	6.36867	8.62322	3.67696
5.36004	3.18434	2.25167	6.755	5.95735	7.8	8.42496	5.36004	1.3	3.67696	4.11096	5.95735	5.36004	4.31161	5.95735	4.11096	6.36867	5.95735	5.95735	3.9	6.36867	7.8	2.90689
5.36004	2.90689	8.42496	7.00071	1.83848	8.32406	8.32406	4.68722	5.36004	2.6	5.2	3.18434	5.36004	3.67696	2.6	3.9	4.11096	6.36867	3.67696	4.11096	5.2	9.00666	3.9
5.2	2.90689	2.6	7.00071	3.18434	8.01374	7.46793	5.36004	3.9	4.11096	3.9	3.67696	1.83848	3.67696	3.67696	4.31161	5.2	6.36867	5.81378	6.755	5.2	8.22192	2.90689
5.2	3.18434	8.32406	7.00071	6.755	7.46793	7.46793	4.31161	1.3	3.67696	4.31161	6.36867	5.36004	4.50333	5.81378	4.31161	5.95735	5.95735	3.67696	5.95735	6.36867	8.32406	4.68722
5.2	3.67696	2.90689	7.00071	6.5	5.66657	7.46793	4.68722	1.3	3.67696	4.11096	3.67696	5.66657	3.67696	2.6	4.11096	5.36004	5.81378	5.81378	5.95735	7.6909	8.72067	3.67696
5.2	3.18434	7.12039	6.5	1.83848	8.01374	7.00071	4.86415	5.36004	2.6	4.11096	3.67696	5.66657	3.67696	4.11096	3.67696	4.86415	6.36867	2.90689	6.62873	6.5	8.22192	2.90689
5.2	3.67696	2.90689	6.62873	2.90689	5.66657	7.12039	4.68722	5.36004	5.36004	5.51543	6.5	2.6	3.9	5.95735	3.67696	6.36867	4.11096	5.81378	6.62873	7.46793	7.8	3.18434
5.36004	3.18434	7.35391	6.5	7.00071	7.8	7.12039	4.68722	3.67696	3.18434	4.68722	3.67696	5.36004	3.67696	2.90689	3.67696	5.2	4.11096	3.67696	6.755	6.36867	8.01374	2.90689
5.81378	3.67696	2.90689	6.36867	6.36867	7.90759	7.46793	4.86415	3.67696	3.9	4.31161	4.31161	5.66657	3.9	4.11096	2.90689	4.86415	3.9	5.51543	6.36867	6.36867	8.32406	3.9
5.95735	2.90689	7.35391	6.755	1.83848	7.46793	7.46793	4.86415	1.83848	3.67696	4.11096	7.12039	2.90689	4.11096	5.81378	3.9	5.51543	3.9	3.18434	7.00071	6.755	7.46793	3.18434
5.66657	3.67696	2.90689	6.36867	1.83848	7.46793	7.46793	4.86415	1.3	5.36004	5.36004	4.11096	5.66657	3.18434	2.90689	4.11096	5.36004	3.9	5.36004	6.755	7.00071	7.6909	4.68722
6.5	2.90689	7.35391	6.5	2.90689	5.36004	7.46793	1.3	5.81378	3.9	5.36004	4.68722	3.67696	3.9	3.9	4.31161	5.36004	4.11096	2.90689	5.81378	6.5	7.00071	4.68722
9.98549	3.67696	2.90689	6.62873	7.00071	4.86415	7.12039	1.83848	3.67696	4.11096	4.86415	7.46793	3.9	3.9	5.95735	4.68722	6.36867	5.81378	5.81378	7.46793	6.755	7.12039	2.90689
5.81378	2.25167	7.12039	6.62873	6.62873	4.31161	7.46793	1.83848	3.9	3.67696	4.86415	4.68722	5.36004	4.50333	2.90689	4.68722	5.66657	4.31161	4.31161	7.46793	8.62322	7.00071	3.18434
5.95735	3.9	3.67696	6.5	1.83848	4.50333	7.46793	5.36004	3.18434	5.51543	4.86415	4.68722	5.66657	2.90689	4.11096	4.86415	5.95735	4.86415	5.81378	7.12039	8.22192	6.755	2.90689
5.81378	2.25167	6.5	6.5	2.6	3.9	7.12039	2.6	1.83848	4.31161	4.68722	7.46793	4.68722	3.67696	6.36867	5.36004	6.36867	4.86415	3.9	6.755	6.5	6.755	3.67696
5.51543	3.67696	3.67696	6.36867	7.00071	7.46793	7.46793	2.25167	1.3	4.31161	5.2	3.9	4.31161	3.9	2.90689	5.51543	5.66657	2.90689	5.36004	6.62873	7.00071	6.09754	3.18434
5.51543	2.90689	6.5	5.81378	1.83848	7.00071	7.00071	2.6	1.3	3.67696	5.2	4.68722	4.31161	3.9	4.31161	2.90689	5.51543	3.67696	3.9	6.5	6.62873	6.36867	4.68722
5.36004	3.9	3.67696	6.36867	3.18434	3.9	7.12039	4.86415	6.36867	5.36004	5.81378	7.35391	5.36004	4.31161	5.81378	2.90689	5.95735	4.86415	5.36004	6.5	7.12039	6.755	3.18434
5.2	2.90689	6.5	6.62873	7.00071	3.9	7.00071	2.6	3.67696	4.86415	5.95735	3.9	4.50333	4.31161	2.90689	3.18434	5.66657	5.2	3.9	6.62873	7.12039	7.46793	2.90689
4.86415	3.67696	3.9	7.00071	6.36867	3.9	6.755	2.6	1.83848	4.68722	5.95735	5.51543	3.9	4.11096	4.11096	3.9	5.36004	5.36004	5.51543	6.62873	9.1	7.00071	3.67696
6.62873	2.90689	6.5	6.36867	3.67696	3.9	7.00071	2.6	1.3	3.67696	5.2	7.12039	4.11096	3.9	5.95735	4.31161	6.36867	5.81378	3.9	6.755	7.00071	7.46793	3.67696
6.5	3.9	3.67696	6.09754	1.83848	3.67696	6.755	4.86415	7.00071	5.95735	4.86415	3.9	5.36004	4.68722	2.6	4.50333	5.51543	6.5	5.51543	5.36004	7.12039	7.00071	4.68722
7.12039	3.18434	6.5	7.35391	3.18434	3.18434	7.12039	3.67696	3.67696	4.68722	5.2	5.81378	5.95735	4.11096	4.31161	4.68722	5.95735	7.12039	3.9	7.46793	7.58024	6.62873	3.67696
6.36867	3.67696	3.9	7.00071	7.00071	7.12039	7.58024	3.9	4.11096	4.68722	6.5	7.58024	4.31161	4.50333	5.95735	4.68722	6.62873	6.5	5.66657	7.35391	7.6909	7.00071	2.90689
10.1533	3.18434	6.5	6.62873	7.00071	6.5	8.32406	3.67696	3.67696	3.67696	5.2	1.83848	4.11096	4.68722	2.6	4.11096	6.5	6.36867	4.11096	7.46793	7.12039	6.755	3.67696
5.66657	4.11096	4.31161	7.35391	4.68722	7.00071	8.01374	3.18434	1.83848	5.81378	6.62873	5.2	5.95735	4.31161	4.31161	3.18434	5.51543	6.36867	5.36004	4.68722	6.62873	6.5	3.18434
5.95735	3.67696	5.95735	6.755	4.68722	6.36867	6.755	2.90689	7.46793	4.68722	5.81378	6.5	4.68722	4.50333	5.81378	3.18434	6.36867	6.5	4.11096	5.95735	9.81478	6.755	4.68722
5.81378	4.50333	4.50333	6.09754	4.68722	6.09754	6.62873	2.6	4.11096	4.68722	6.5	7.6909	4.31161	4.68722	2.6	3.18434	6.62873	6.5	5.51543	5.95735	7.6909	6.62873	3.67696
5.51543	3.67696	5.81378	7.35391	4.68722	5.95735	7.12039	5.2	1.3	3.67696	5.81378	1.3	3.67696	4.11096	4.11096	3.9	6.36867	4.68722	4.86415	6.5	7.6909	6.5	3.67696
5.36004	3.9	4.50333	6.755	4.68722	6.36867	8.22192	3.9	1.83848	5.95735	6.5	5.2	3.67696	4.86415	5.95735	3.18434	7.00071	5.36004	5.51543	7.00071	7.8	6.755	3.67696
5.2	3.67696	5.51543	6.36867	4.68722	5.66657	6.36867	3.9	1.83848	5.51543	5.95735	6.36867	5.95735	4.68722	2.6	5.36004	7.00071	4.86415	5.36004	7.00071	7.8	6.755	3.9
5.2	3.67696	4.86415	7.00071	4.31161	6.36867	8.22192	3.9	1.3	4.68722	6.5	7.00071	3.67696	4.11096	4.31161	3.18434	5.95735	5.51543	5.51543	7.46793	7.8	6.62873	5.51543
6.755	3.18434	5.36004	7.00071	4.11096	5.66657	5.36004	3.67696	7.6909	4.11096	6.5	1.3	3.67696	4.68722	5.81378	3.67696	7.35391	3.67696	5.51543	7.00071	7.90759	6.5	4.68722
9.46414	3.67696	5.36004	6.755	3.67696	6.09754	5.36004	5.2	4.68722	6.36867	6.36867	5.2	6.36867	4.50333	2.6	4.31161	7.00071	3.9	5.81378	7.46793	8.01374	6.5	3.67696
8.72067	2.90689	5.2	6.36867	3.67696	5.95735	5.2	3.9	4.31161	4.86415	6.5	6.62873	6.62873	3.9	4.31161	4.68722	6.5	3.9	5.51543	7.00071	8.32406	6.755	3.9
8.22192	3.9	5.36004	7.46793	2.25167	6.36867	7.35391	4.31161	4.31161	5.51543	6.5	7.00071	3.67696	5.36004	5.81378	4.50333	7.00071	3.9	5.36004	7.46793	8.62322	6.62873	3.9
7.00071	3.18434	5.66657	7.00071	1.3	6.36867	4.11096	4.11096	2.90689	4.31161	5.95735	7.46793	3.9	4.31161	2.6	4.68722	7.00071	3.9	4.68722	4.68722	9.1	6.5	4.50333
7.58024	3.67696	4.86415	7.00071	1.83848	6.09754	4.68722	5.36004	8.32406	5.81378	6.36867	1.83848	7.00071	5.36004	4.50333	4.68722	5.95735	3.67696	5.81378	4.31161	9.55301	6.62873	5.51543
7.00071	3.18434	5.2	7.58024	3.18434	5.66657	5.2	3.67696	8.01374	5.2	5.95735	4.86415	4.31161	4.31161	5.66657	4.11096	7.6909	3.9	5.81378	4.31161	9.81478	6.755	3.67696
6.62873	3.9	5.36004	7.46793	7.00071	6.09754	4.68722	3.9	7.35391	5.2	6.755	7.58024	4.68722	4.86415	2.25167	3.9	7.6909	3.67696	4.68722	6.5	9.90051	6.36867	3.67696
7.00071	3.67696	5.51543	7.00071	4.68722	6.5	7.35391	4.11096	6.5	4.86415	5.36004	2.25167	7.46793	5.95735	4.86415	3.9	6.36867	3.9	5.81378	6.755	9.72831	6.36867	3.67696
6.36867	3.9	5.36004	7.8	4.68722	6.5	2.90689	3.9	6.5	6.36867	1.3	5.51543	4.68722	5.36004	5.66657	3.67696	8.52467	3.9	6.36867	4.68722	9.55301	6.36867	3.9
6.09754	3.18434	5.51543	7.46793	4.68722	6.5	3.9	3.9	6.5	5.36004	1.83848	7.58024	4.31161	5.36004	1.83848	3.67696	8.52467	3.9	5.36004	4.68722	10.4809	6.755	3.9
5.95735	3.67696	5.66657	5.95735	4.68722	6.5	3.67696	5.51543	5.36004	5.2	3.67696	2.25167	5.36004	4.86415	4.31161	3.67696	6.36867	3.9	6.36867	4.31161	10.4809	5.95735	3.9
5.66657	3.18434	5.36004	8.32406	4.68722	7.46793	4.68722	3.9	4.68722	4.86415	3.67696	5.51543	4.86415	5.95735	5.66657	3.67696	8.72067	3.9	5.36004	6.62873	10.1533	6.62873	4.50333
5.95735	3.67696	5.2	8.01374	4.11096	7.35391	4.68722	3.9	4.68722	6.36867	3.67696	7.58024	7.58024	5.51543	1.83848	3.67696	8.42496	4.31161	6.5	7.00071	3.18434	5.36004	4.50333
6.09754	3.18434	5.2	7.00071	3.18434	7.35391	4.11096	4.11096	4.31161	5.36004	7.12039	1.83848	4.86415	5.95735	4.86415	3.67696	6.5	4.68722	5.36004	4.50333	9.28386	5.36004	4.50333
5.81378	3.67696	4.68722	8.72067	3.67696	8.01374	7.35391	6.62873	3.67696	6.5	5.51543	5.66657	5.81378	5.66657	5.36004	3.18434	9.46414	4.31161	6.5	4.31161	9.81478	6.36867	4.86415
5.51543	3.67696	5.2	8.32406	7.12039	8.22192	2.90689	3.9	3.67696	5.51543	5.81378	7.46793	6.36867	5.81378	2.25167	3.18434	9.1	4.31161	4.68722	4.86415	2.6	5.36004	3.18434
5.51543	3.67696	5.36004	7.00071	5.36004	8.32406	3.9	4.11096	4.86415	5.51543	2.6	1.83848	6.755	5.81378	4.86415	3.67696	6.5	4.86415	6.5	5.36004	10.4809	6.36867	3.67696
5.36004	3.67696	5.36004	8.32406	5.36004	3.67696	7.12039	4.11096	2.90689	6.36867	2.90689	5.2	6.755	6.62873	5.51543	5.36004	9.72831	4.86415	6.5	5.51543	10.4809	4.68722	3.67696
6.5	3.67696	5.36004	8.72067	4.86415	3.9	6.62873	7.00071	3.67696	6.5	2.90689	5.36004	7.00071	7.00071	2.6	5.2	9.1	4.86415	4.68722	5.95735	10.2362	4.68722	2.25167
9.46414	3.67696	5.36004	6.62873	4.68722	8.42496	6.62873	4.68722	4.11096	5.95735	3.18434	7.35391	7.46793	7.00071	4.86415	4.31161	6.62873	5.66657	6.62873	6.36867	2.90689	5.95735	3.67696
6.62873	3.67696	4.68722	9.00666	3.9	4.68722	6.5	4.31161	4.68722	5.95735	3.67696	1.83848	7.58024	7.00071	4.86415	4.68722	9.98549	6.5	4.68722	6.5	10.2362	3.9	3.67696
6.62873	3.67696	4.68722	6.5	3.9	4.11096	7.00071	6.5	8.72067	6.755	4.68722	5.36004	7.58024	6.5	2.25167	3.67696	9.98549	6.62873	6.5	6.5	2.90689	4.31161	3.9
6.5	3.67696	4.31161	9.19239	7.00071	4.68722	7.46793	6.755	3.67696	6.5	4.31161	7.35391	7.58024	7.6909	5.36004	3.18434	6.36867	5.36004	6.62873	6.5	9.37443	5.66657	4.50333
5.95735	3.67696	4.68722	7.12039	7.12039	4.86415	7.12039	6.62873	2.90689	6.5	4.86415	2.25167	7.58024	7.00071	4.68722	3.18434	9.98549	4.68722	5.36004	6.5	2.90689	4.11096	4.50333
5.66657	3.67696	4.68722	9.55301	5.36004	4.86415	7.00071	5.95735	3.67696	6.36867	4.86415	5.51543	8.32406	7.6909	1.83848	2.90689	9.98549	5.2	6.62873	7.00071	9.28386	5.95735	4.86415
6.09754	3.67696	4.86415	7.00071	5.2	8.32406	7.46793	5.81378	2.6	7.12039	6.5	7.35391	8.01374	8.01374	4.31161	3.18434	6.5	4.86415	5.36004	7.00071	9.46414	4.31161	2.90689
9.46414	3.67696	4.31161	9.19239	4.68722	4.68722	7.58024	4.86415	4.31161	7.00071	5.81378	2.6	8.32406	8.22192	4.86415	5.2	9.81478	5.36004	7.00071	7.00071	2.90689	5.95735	2.90689
6.36867	4.31161	5.36004	7.00071	3.9	4.31161	7.58024	4.68722	5.36004	6.5	5.81378	5.36004	7.90759	7.46793	2.25167	5.2	6.36867	4.86415	6.62873	7.35391	8.72067	3.9	2.90689
6.62873	3.67696	4.11096	9.28386	7.12039	5.51543	7.8	4.11096	7.00071	5.95735	4.68722	7.35391	8.01374	8.01374	4.86415	5.2	9.1	5.36004	5.51543	6.62873	8.81703	5.36004	2.90689
6.36867	3.9	4.86415	8.22192	4.86415	5.36004	8.01374	5.51543	6.36867	7.12039	5.36004	2.6	7.6909	8.32406	4.68722	6.36867	6.62873	5.36004	6.62873	6.62873	2.6	4.11096	1.83848
5.95735	3.67696	3.67696	9.28386	4.68722	5.51543	8.32406	6.5	7.46793	7.00071	5.36004	5.36004	7.00071	7.8	2.25167	5.2	8.62322	6.36867	5.36004	4.31161	8.22192	5.2	4.50333
6.09754	4.31161	5.36004	8.22192	4.86415	5.81378	7.58024	6.36867	7.6909	7.6909	5.95735	7.46793	7.58024	7.35391	5.36004	6.5	6.5	5.36004	7.35391	4.50333	8.52467	4.11096	5.36004
6.09754	3.9	3.9	10.1533	5.2	9.46414	7.58024	5.95735	9.1	5.66657	6.62873	2.6	6.755	7.35391	4.86415	6.36867	7.90759	5.51543	4.68722	7.00071	2.90689	5.2	3.18434
8.62322	3.9	5.36004	8.32406	5.51543	5.36004	8.01374	5.2	3.18434	7.12039	5.81378	4.68722	6.36867	6.5	1.83848	6.5	6.5	5.36004	7.00071	7.12039	7.90759	3.9	1.83848
5.81378	3.9	4.86415	10.1533	5.51543	7.00071	8.01374	4.31161	3.18434	7.58024	5.95735	7.58024	7.46793	6.5	4.68722	6.36867	8.22192	7.00071	4.68722	7.00071	2.25167	5.51543	4.50333
5.95735	3.9	5.36004	8.81703	5.36004	7.46793	7.12039	4.68722	2.6	7.6909	5.66657	2.6	7.12039	6.5	4.68722	6.5	6.09754	5.36004	7.8	7.12039	7.00071	3.18434	4.68722
6.36867	4.31161	4.68722	10.2362	5.36004	7.46793	7.12039	5.95735	2.6	6.36867	5.51543	5.36004	7.12039	6.5	2.25167	7.00071	7.8	6.62873	4.86415	7.00071	7.58024	5.36004	2.90689
6.36867	3.9	5.95735	8.42496	5.2	9.72831	7.12039	5.95735	5.36004	7.46793	7.90759	7.58024	7.12039	6.36867	4.86415	6.5	5.81378	6.5	7.46793	7.00071	1.83848	3.67696	3.67696
5.66657	4.68722	5.66657	10.4809	4.86415	8.42496	7.12039	4.86415	4.68722	7.58024	5.51543	2.6	6.62873	5.95735	4.86415	6.755	7.00071	6.62873	5.2	4.68722	6.755	5.2	2.90689
9.1	4.31161	6.5	8.72067	4.68722	10.1533	7.12039	5.2	9.1	8.72067	5.81378	5.2	7.00071	5.81378	2.6	7.00071	6.36867	5.81378	7.00071	3.67696	7.12039	3.18434	2.6
5.95735	4.31161	6.09754	11.0309	4.68722	9.98549	7.12039	5.2	8.72067	5.95735	5.81378	7.58024	6.755	5.95735	5.2	6.36867	7.35391	5.36004	5.2	7.12039	2.25167	4.86415	4.50333
6.09754	3.9	7.35391	9.90051	4.68722	9.46414	7.46793	4.86415	2.6	7.58024	5.81378	2.6	6.36867	5.95735	4.68722	6.62873	6.36867	5.51543	7.8	7.35391	6.62873	3.67696	4.50333
8.32406	4.50333	6.62873	11.0309	4.68722	8.01374	7.00071	4.11096	2.6	8.52467	5.81378	5.51543	7.00071	5.95735	2.6	6.62873	6.5	5.81378	4.31161	7.46793	7.00071	4.68722	4.86415
3.9	3.9	7.90759	10.1533	4.68722	7.58024	6.62873	4.68722	2.6	8.32406	5.95735	7.90759	6.5	5.2	4.68722	6.36867	6.36867	5.81378	7.46793	7.58024	2.25167	3.18434	3.67696
4.50333	3.9	7.35391	11.4813	4.68722	9.19239	6.5	4.31161	4.68722	5.81378	6.5	3.67696	6.62873	5.81378	4.68722	6.36867	6.36867	5.95735	4.86415	7.00071	6.62873	4.86415	2.90689
5.51543	4.31161	8.22192	10.2362	4.68722	9.81478	6.5	6.36867	5.51543	8.32406	6.5	5.36004	1.3	5.36004	2.6	6.36867	6.09754	6.36867	8.01374	7.12039	7.00071	3.67696	4.31161
5.51543	3.67696	8.62322	11.7	4.31161	10.4809	6.5	5.95735	5.36004	7.90759	7.12039	8.01374	6.62873	5.95735	4.86415	5.2	6.36867	7.58024	4.86415	6.5	2.25167	4.86415	4.86415
5.51543	4.50333	8.81703	11.0309	7.00071	9.90051	6.5	5.2	9.1	8.62322	7.90759	3.9	6.36867	5.51543	4.86415	5.95735	6.36867	5.95735	7.8	4.68722	7.00071	3.67696	3.67696
5.66657	4.31161	8.62322	10.4809	5.36004	9.98549	6.5	5.2	5.36004	5.51543	7.46793	4.68722	1.83848	5.36004	2.6	5.95735	6.36867	6.36867	5.36004	3.67696	7.00071	4.68722	3.67696
5.95735	4.31161	8.22192	11.4813	4.86415	9.98549	6.62873	4.68722	5.36004	8.22192	7.6909	8.22192	1.83848	5.95735	5.2	5.66657	6.62873	7.58024	7.46793	3.67696	2.25167	2.90689	3.67696
8.01374	4.68722	8.32406	11.183	4.68722	9.19239	6.62873	4.31161	9.1	7.58024	7.46793	4.31161	6.62873	5.81378	4.86415	5.2	6.62873	6.5	5.95735	7.35391	7.00071	4.31161	2.90689
4.31161	4.86415	7.46793	11.2583	5.36004	8.72067	6.5	6.5	9.1	5.95735	7.00071	5.2	1.83848	5.36004	2.6	5.95735	6.62873	8.32406	7.46793	7.35391	7.00071	3.9	3.18434
4.68722	4.68722	7.58024	11.2583	5.36004	8.72067	6.755	6.36867	5.36004	8.22192	5.81378	8.62322	7.00071	6.36867	4.11096	5.66657	7.00071	7.00071	6.36867	7.46793	2.25167	4.68722	3.18434
4.86415	4.50333	7.58024	11.1072	5.36004	8.42496	6.5	4.86415	5.66657	8.22192	5.81378	4.68722	1.3	6.36867	5.2	5.51543	6.755	7.00071	8.32406	7.35391	7.46793	4.11096	3.67696
5.36004	4.68722	7.46793	11.0309	5.36004	8.62322	6.5	5.2	9.1	7.90759	7.00071	4.86415	1.83848	6.36867	2.6	5.95735	7.46793	8.01374	5.81378	7.00071	1.83848	4.68722	4.31161
5.51543	4.86415	6.62873	10.7986	4.86415	8.22192	6.5	4.86415	5.66657	5.95735	7.6909	8.32406	6.62873	6.62873	4.86415	5.95735	6.5	7.00071	7.58024	4.11096	7.00071	4.11096	5.36004
5.95735	4.86415	7.12039	10.5612	4.68722	8.22192	6.5	4.68722	5.36004	8.72067	7.46793	5.36004	1.3	7.00071	5.81378	6.36867	7.00071	7.58024	7.00071	3.67696	7.58024	4.11096	3.9
6.09754	5.36004	7.00071	10.4809	5.2	8.01374	5.95735	4.31161	8.42496	8.22192	8.01374	5.81378	1.3	7.12039	3.67696	7.00071	7.46793	7.90759	8.01374	6.36867	2.25167	4.31161	3.9
8.32406	4.50333	6.5	9.28386	5.36004	7.8	6.5	6.5	9.1	7.90759	6.5	7.46793	1.3	7.00071	5.2	6.62873	7.58024	8.01374	6.36867	5.81378	7.35391	4.31161	3.9
6.62873	4.68722	6.5	9.19239	5.36004	7.90759	5.95735	4.68722	5.36004	8.72067	7.90759	5.66657	6.62873	7.00071	5.51543	7.00071	8.01374	8.32406	8.01374	7.12039	7.58024	3.9	3.9
7.90759	4.50333	6.36867	9.19239	5.36004	7.8	5.81378	4.86415	5.66657	5.66657	7.90759	4.68722	1.3	7.46793	3.67696	7.35391	8.22192	8.01374	7.12039	7.00071	8.01374	4.68722	4.50333
6.36867	4.68722	6.36867	9.19239	4.68722	7.6909	5.36004	4.86415	5.81378	8.72067	6.755	7.8	1.83848	7.35391	4.11096	7.35391	8.32406	8.62322	6.5	4.31161	1.83848	4.68722	4.68722
6.09754	4.50333	5.36004	9.19239	4.31161	7.8	6.36867	4.68722	8.22192	5.51543	7.12039	6.09754	1.3	7.46793	5.51543	7.00071	8.52467	7.46793	6.5	3.18434	8.01374	4.11096	4.31161
7.58024	4.86415	5.51543	9.19239	4.31161	7.8	6.62873	4.31161	8.72067	9.19239	7.46793	4.68722	6.5	7.46793	4.50333	7.46793	8.52467	8.22192	5.81378	5.81378	2.25167	4.11096	4.31161
6.62873	4.31161	5.51543	9.1	6.62873	7.6909	6.755	3.9	5.51543	5.81378	7.12039	7.8	2.25167	7.00071	4.86415	7.46793	8.81703	8.22192	8.01374	5.81378	7.58024	3.9	3.9
7.00071	5.66657	5.51543	8.81703	5.2	7.12039	6.62873	6.62873	6.36867	9.46414	7.46793	6.755	1.83848	7.46793	6.36867	7.12039	8.72067	8.22192	7.8	5.81378	8.22192	4.68722	3.9
6.09754	3.9	5.51543	8.72067	5.36004	7.00071	6.5	6.5	6.62873	5.95735	7.12039	5.2	6.36867	6.755	4.86415	7.00071	9.00666	8.32406	5.36004	5.81378	8.01374	3.9	3.67696
6.62873	5.36004	5.51543	8.72067	5.81378	5.36004	6.5	5.51543	8.42496	9.46414	6.62873	7.8	2.90689	7.12039	5.36004	6.62873	9.19239	9.1	4.68722	5.51543	2.25167	4.31161	4.31161
5.95735	3.9	5.51543	8.42496	5.66657	9.46414	6.5	5.2	6.5	6.36867	7.00071	7.12039	2.25167	6.62873	7.00071	7.58024	9.55301	9.19239	4.11096	6.5	7.8	3.18434	4.50333
6.5	5.66657	5.51543	8.32406	4.68722	9.98549	6.36867	4.68722	7.12039	9.46414	7.00071	5.2	2.6	6.36867	5.36004	6.5	9.46414	9.19239	3.9	6.755	2.90689	4.68722	3.67696
5.81378	3.9	5.51543	8.32406	7.00071	7.00071	5.81378	4.11096	8.22192	6.5	7.00071	7.90759	6.36867	6.755	4.31161	5.95735	9.55301	9.1	7.6909	4.11096	7.58024	2.90689	3.18434
7.8	5.36004	4.68722	8.32406	6.5	6.62873	5.95735	3.67696	8.22192	9.90051	7.00071	6.62873	6.09754	6.5	6.62873	5.2	9.37443	9.1	8.01374	2.90689	2.6	4.68722	3.9
7.8	4.31161	3.9	8.81703	5.36004	6.5	5.81378	6.5	8.32406	6.36867	7.12039	5.36004	2.90689	5.95735	5.51543	7.00071	8.72067	8.32406	2.90689	2.90689	7.00071	3.67696	3.9
6.5	4.86415	4.50333	9.1	5.66657	6.5	5.81378	7.00071	8.81703	9.1	7.00071	5.36004	5.36004	5.36004	5.36004	5.36004	9.1	8.22192	3.18434	7.8	7.46793	4.31161	3.67696
7.46793	3.9	3.9	9.19239	5.81378	6.36867	6.36867	6.5	9.1	5.95735	7.12039	5.36004	2.90689	6.5	6.36867	4.68722	9.00666	7.46793	2.90689	6.62873	8.01374	3.67696	4.31161
7.46793	5.36004	4.31161	9.1	5.51543	9.90051	6.62873	6.36867	7.00071	10.4809	7.00071	5.36004	2.90689	7.00071	5.66657	6.755	8.42496	7.58024	8.22192	7.8	2.90689	4.68722	4.31161
7.12039	3.9	4.31161	9.1	5.2	9.72831	6.36867	6.36867	8.72067	9.98549	7.00071	5.36004	3.18434	5.81378	4.11096	4.86415	8.72067	6.36867	8.32406	7.46793	7.12039	2.6	3.67696
7.12039	4.68722	4.31161	9.1	5.2	9.46414	6.36867	5.51543	8.72067	5.81378	7.46793	7.46793	5.95735	6.62873	6.62873	4.11096	8.52467	6.5	2.6	7.00071	2.6	4.11096	3.9
7.12039	3.9	4.31161	9.1	5.36004	8.62322	6.36867	4.68722	8.72067	9.55301	7.46793	5.2	2.90689	6.5	5.95735	4.68722	8.32406	6.5	2.6	4.11096	6.62873	2.6	4.86415
7.12039	5.36004	3.9	8.72067	7.00071	8.32406	5.95735	4.31161	8.72067	5.81378	7.46793	8.22192	2.90689	6.5	4.31161	5.95735	8.01374	6.62873	2.6	2.90689	7.00071	3.9	4.50333
1.83848	3.67696	5.36004	8.22192	5.2	8.32406	5.51543	3.67696	9.19239	10.7986	7.8	7.58024	6.36867	6.5	7.00071	3.9	7.8	7.00071	2.90689	2.90689	3.67696	2.90689	4.31161
7.46793	5.36004	5.36004	8.32406	5.2	8.32406	6.36867	3.67696	8.72067	5.36004	7.46793	5.36004	2.6	6.5	6.36867	5.81378	7.58024	7.00071	2.90689	7.8	6.36867	4.11096	4.50333
1.83848	3.9	4.86415	8.32406	5.2	7.46793	6.5	7.00071	8.32406	11.0309	7.6909	7.58024	2.90689	6.5	5.36004	5.95735	7.58024	7.12039	8.32406	8.22192	7.00071	2.90689	5.36004
7.46793	4.86415	4.68722	8.32406	5.66657	6.5	6.36867	6.36867	8.72067	6.36867	7.12039	7.6909	2.6	5.81378	7.00071	5.81378	6.62873	6.36867	2.6	8.72067	6.62873	3.67696	4.50333
1.83848	3.9	4.68722	8.32406	5.36004	7.00071	6.5	3.67696	8.22192	11.1072	7.58024	5.36004	2.6	5.81378	5.36004	2.90689	7.00071	7.00071	2.6	8.52467	3.9	2.90689	4.31161
7.46793	4.68722	4.31161	8.32406	5.2	6.5	5.36004	6.62873	8.42496	6.5	7.00071	4.86415	3.18434	5.81378	7.12039	5.36004	7.00071	7.00071	1.83848	4.68722	6.755	4.11096	4.50333
2.25167	3.67696	4.31161	8.32406	4.86415	6.755	5.81378	7.00071	8.22192	11.183	7.46793	7.8	6.5	5.95735	4.86415	4.68722	6.5	6.62873	8.42496	2.6	6.5	2.6	4.50333
7.46793	5.36004	4.31161	8.32406	7.00071	6.755	6.36867	7.00071	8.32406	6.5	7.00071	8.01374	2.90689	6.36867	7.00071	4.86415	6.62873	6.5	2.6	2.90689	4.31161	3.67696	4.31161
3.18434	3.9	5.51543	8.32406	7.35391	6.755	6.36867	6.62873	7.58024	11.183	7.00071	4.68722	3.67696	5.2	5.36004	3.18434	6.36867	6.36867	2.25167	2.90689	6.62873	2.6	4.86415
8.32406	4.68722	5.36004	8.22192	6.5	6.62873	6.36867	3.67696	8.01374	6.36867	7.00071	4.86415	2.6	5.36004	6.36867	5.2	6.36867	6.5	1.83848	2.90689	5.95735	2.90689	5.36004
3.18434	3.9	4.68722	8.22192	5.2	7.00071	5.2	6.5	8.01374	11.1072	7.00071	5.36004	2.90689	5.81378	5.2	4.68722	6.36867	7.00071	8.32406	2.6	4.86415	2.6	5.36004
7.8	4.31161	4.68722	8.22192	5.2	6.62873	5.51543	6.5	8.01374	6.5	7.00071	7.8	3.18434	5.95735	6.62873	3.18434	5.36004	7.35391	8.62322	2.6	6.36867	2.90689	3.9
3.67696	3.9	3.9	7.35391	4.86415	6.5	5.95735	6.62873	7.8	11.1072	7.00071	7.8	5.95735	6.36867	4.86415	4.68722	5.81378	7.00071	7.90759	2.6	5.95735	2.6	4.50333
8.72067	5.36004	4.86415	7.12039	4.68722	6.62873	6.62873	6.755	7.58024	6.5	7.00071	5.81378	3.18434	5.2	6.36867	3.67696	5.95735	7.46793	8.01374	5.36004	4.86415	2.6	4.50333
5.36004	3.9	4.50333	7.46793	4.31161	6.62873	5.2	7.12039	7.8	10.5612	6.62873	5.81378	3.67696	5.36004	5.2	2.90689	5.66657	7.6909	7.90759	7.00071	6.5	2.6	3.9
4.31161	5.36004	4.86415	7.35391	4.11096	6.755	5.51543	7.46793	7.12039	6.5	7.35391	7.8	2.6	5.95735	6.5	4.68722	6.09754	7.46793	8.22192	8.22192	5.95735		3.9
9.1	3.9	4.68722	7.35391	7.6909	6.36867	6.36867	7.00071	7.58024	11.0309	6.36867	7.8	3.18434	5.2	4.68722	3.18434	5.51543	7.6909	8.62322	8.22192	7.00071		4.50333
6.36867	4.68722	4.68722	7.35391	7.35391	6.5	6.36867	3.18434	6.62873	6.5	5.95735	7.6909	3.67696	5.36004	5.95735	2.90689	6.36867	7.46793	8.62322	4.11096	6.5		4.86415
4.68722	3.9	4.68722	7.12039	7.35391	6.755	5.95735	7.58024	7.46793	10.4809	7.00071	7.46793	3.18434	5.2	4.86415	4.68722	5.81378	7.6909	8.01374	1.3	6.36867		5.36004
5.81378	3.67696	2.90689	6.5	6.62873	6.5	7.8	7.58024	6.5	6.5	7.00071	6.36867	7.00071	5.81378	5.95735	2.90689	6.36867	8.01374	8.32406	2.6	6.5		3.9
5.36004	4.68722	5.36004	7.00071	6.755	6.62873	7.46793	7.58024	7.12039	10.4809	6.62873	6.5	3.18434	5.95735	5.2	2.90689	5.81378	7.6909	8.72067	1.83848	7.00071		3.9
9.1	3.9	3.9	6.62873	5.95735	6.62873	6.62873	3.18434	6.755	6.5	7.35391	7.8	3.67696	3.9	5.66657	4.68722	6.5	4.86415	8.22192	2.90689	6.5		3.9
7.46793	5.51543	4.31161	6.5	5.36004	6.755	6.5	8.72067	6.5	9.90051	7.35391	7.8	3.9	4.68722	5.36004	2.6	5.81378	5.51543	8.62322	2.90689	6.5		3.9
8.62322	3.9	4.68722	7.35391	5.2	6.36867	6.5	8.72067	6.5	6.62873	8.01374	5.2	3.9	6.36867	5.36004	2.6	5.51543	5.95735	7.90759	2.6	5.81378		3.9
8.62322	4.31161	4.50333	7.35391	4.31161	5.95735	6.5	8.62322	6.5	9.98549	8.32406	9.1	2.90689	3.9	5.2	4.11096	5.36004	5.36004	8.01374	4.86415	5.81378		4.86415
8.32406	5.36004	4.68722	6.5	7.6909	5.66657	6.5	2.90689	6.5	7.00071	8.32406	8.22192	7.6909	5.81378	4.68722	1.83848	4.86415	6.5	8.32406	4.86415	5.2		4.86415
9.37443	4.31161	4.68722	6.5	7.35391	5.51543	6.5	8.81703	6.755	9.72831	7.46793	5.2	3.18434	5.95735	5.81378	2.6	6.5	7.46793	7.58024	5.36004	5.2		3.9
9.1	3.9	3.9	7.35391	7.6909	5.66657	6.36867	8.81703	6.5	9.19239	6.62873	9.1	3.9	3.67696	4.31161	4.11096	4.68722	7.00071	7.58024	4.86415	5.2		4.86415
9.19239	4.50333	3.9	7.35391	7.6909	5.81378	5.95735	8.62322	6.755	7.35391	6.36867	9.1	3.67696	5.36004	5.51543	2.25167	4.31161	7.12039	7.35391	5.81378	5.2		4.86415
8.32406	5.36004	4.50333	7.8	7.00071	5.66657	7.58024	2.90689	6.5	9.19239	5.81378	8.81703	3.67696	5.81378	4.86415	2.25167	4.11096	7.46793	8.62322	5.95735	5.2		4.50333
8.32406	4.31161	4.86415	7.90759	7.46793	5.51543	7.8	9.1	6.62873	7.35391	5.36004	5.2	4.11096	5.36004	5.95735	4.11096	5.66657	7.12039	7.00071	7.58024	5.36004		4.50333
7.58024	3.9	3.9	7.35391	8.22192	5.51543	7.8	8.42496	5.95735	8.72067	5.36004	3.9	4.11096	5.66657	4.68722	1.83848	3.18434	7.12039	5.81378	4.68722	5.36004		3.9
7.58024	4.31161	4.31161	7.35391	6.62873	5.66657	7.58024	8.32406	6.36867	7.35391	4.86415	8.81703	8.32406	5.2	5.51543	2.6	3.67696	7.00071	5.81378	4.68722	5.51543		4.50333
8.22192	5.36004	4.11096	6.5	8.01374	5.2	7.35391	8.22192	2.6	8.81703	4.86415	8.72067	4.11096	4.11096	4.50333	4.11096	5.66657	6.62873	5.81378	5.2	5.81378		4.50333
7.58024	3.9	5.36004	6.755	6.62873	5.36004	7.00071	2.90689	2.90689	7.35391	4.68722	8.32406	3.9	4.31161	5.66657	1.83848	2.6	5.36004	5.36004	5.2	5.81378		4.50333
7.58024	4.31161	3.9	7.00071	8.01374	5.51543	6.36867	2.90689	6.62873	8.32406	4.86415	3.9	3.67696	5.51543	4.31161	2.6	2.90689	4.86415	8.22192	4.86415	5.81378		4.50333
7.58024	4.68722	4.50333	6.62873	6.36867	5.95735	5.81378	8.01374	2.90689	7.12039	4.31161	8.62322	3.67696	5.81378	5.95735	3.9	2.90689	4.68722	4.68722	6.62873	5.81378		3.9
7.58024	4.50333	4.11096	6.5	7.46793	6.36867	6.36867	8.22192	3.67696	8.32406	4.31161	8.22192	4.11096	5.81378	3.9	1.3	5.51543	4.86415	4.68722	4.68722	5.95735		4.50333
7.00071	3.9	4.68722	5.95735	8.01374	6.5	1.3	7.90759	3.67696	7.46793	4.68722	8.01374	4.86415	5.51543	5.95735	2.6	2.6	5.2	4.31161	3.9	6.5		3.67696
7.46793	4.50333	3.9	6.36867	5.95735	6.5	6.36867	7.90759	3.67696	7.58024	4.68722	5.2	5.2	5.36004	3.9	4.11096	2.6	5.2	4.86415	4.50333	6.62873		3.9
7.12039	5.36004	4.31161	6.09754	6.09754	6.5	5.95735	7.8	3.9	7.58024	4.31161	3.9	5.36004	2.6	5.36004	3.67696	5.36004	5.36004	5.2	4.31161	6.5		3.9
6.5	4.50333	3.9	6.36867	7.58024	6.5	2.25167	2.90689	3.9	7.6909	4.31161	4.50333	5.95735	5.36004	3.9	1.3	2.90689	5.51543	4.68722	5.36004	5.81378		3.18434
6.5	4.31161	5.95735	5.66657	6.09754	6.62873	6.36867	3.18434	3.9	7.58024	4.31161	7.90759	7.00071	4.31161	5.66657	2.6	2.25167	5.36004	4.11096	5.36004	5.95735		4.86415
6.5	5.36004	3.9	5.66657	8.01374	7.00071	3.67696	3.18434	3.9	7.6909	3.67696	6.62873	8.72067	4.68722	3.9	3.67696	4.68722	6.36867	8.01374	5.51543	5.81378		3.18434
6.5	4.86415	4.11096	5.95735	7.12039	6.62873	3.9	3.18434	3.9	7.6909	3.67696	5.2	3.67696	4.68722	5.2	3.18434	2.25167	6.36867	4.68722	5.95735	4.68722		4.86415
6.5	4.50333	4.31161	5.66657	6.62873	7.35391	3.67696	2.90689	3.9	7.8	3.67696	4.11096	3.9	4.68722	3.9	1.3	2.6	6.36867	4.68722	5.2	4.68722		3.67696
6.5	3.9	4.11096	5.36004	7.46793	6.36867	2.6	3.67696	3.9	7.8	2.6	4.31161	8.81703	4.31161	5.66657	2.6	4.68722	5.81378	3.67696	5.2	5.66657		5.66657
6.5	4.31161	5.81378	4.86415	7.46793	7.12039	2.6	3.67696	3.9	7.46793	2.90689	4.31161	9.1	3.67696	3.67696	3.67696	1.83848	5.36004	7.58024	3.67696	4.68722		3.18434
7.00071	4.68722	4.31161	4.86415	7.00071	7.00071	6.5	7.58024	3.9	7.8	2.90689	4.50333	3.67696	2.90689	3.67696	3.67696	2.6	4.86415	4.31161	3.9	5.51543		2.90689
7.00071	4.31161	4.11096	5.2	6.755	7.12039	5.51543	7.46793	3.9	7.46793	1.83848	7.12039	3.18434	4.31161	5.36004	1.3	2.25167	4.68722	3.9	3.9	4.31161		2.90689
6.755	3.9	6.36867	4.86415	7.46793	6.36867	5.2	2.90689	3.9	7.8	1.83848	7.00071	3.67696	5.2	3.9	2.6	4.68722	5.36004	3.67696	3.9	5.36004		6.09754
6.62873	5.36004	4.31161	4.68722	7.46793	6.36867	5.81378	4.50333	3.9	7.46793	1.3	6.755	3.9	2.90689	5.95735	3.67696	2.6	5.36004	7.58024	5.36004	3.9		2.90689
6.62873	3.67696	6.36867	4.86415	7.46793	4.86415	6.5	7.46793	3.9	7.8	1.3	6.5	3.67696	2.6	4.31161	2.90689	2.6	5.36004	3.9	4.68722	4.68722		5.95735
5.81378	3.9	3.9	4.68722	7.35391	6.5	6.36867	7.12039	3.67696	7.46793	1.3	5.2	9.72831	4.68722	5.51543	1.3	2.90689	4.86415	3.67696	5.36004	3.9		2.90689
5.36004	3.9	4.50333	4.68722	7.90759	4.50333	5.95735	6.5	3.9	7.35391		4.11096	8.81703	3.67696	4.50333	2.6	3.67696	5.51543	7.58024	3.67696	4.68722		6.755
6.5	4.86415	4.11096	4.68722	7.8	4.86415	5.2	6.5	3.67696	7.12039		4.11096	3.9	5.2	5.36004	2.90689	3.67696	5.2	3.9	4.11096	3.9		2.90689
6.5	3.67696	6.36867	4.68722	7.6909	4.86415	5.2	6.5	3.18434	7.12039		4.68722	3.67696	2.6	4.68722	1.3	3.9	5.36004	3.9	4.31161	4.31161		5.51543
6.5	3.9	6.09754	4.31161	7.46793	4.68722	5.2	2.90689	2.90689	7.12039		5.51543	3.9	2.6	5.81378	2.6	3.9	5.36004	3.67696	5.36004	3.67696		5.51543
6.5	4.50333	5.66657	4.68722	7.6909	5.51543	5.2	4.31161	7.00071	7.00071		6.5	9.1	2.6	4.86415	2.90689	3.67696	5.36004	6.5	3.67696	4.31161		6.5
7.8	3.9	4.31161	4.31161	7.58024	4.50333	5.36004	4.50333	2.6	7.46793		6.62873	9.1	2.6	5.95735	1.3	3.9	5.36004	6.5	4.31161	4.31161		7.00071
7.90759	4.50333	4.11096	5.81378	7.8	4.50333	4.68722	4.86415	2.6	7.00071		6.36867	8.32406	5.2	5.36004	2.6	3.9	5.36004	6.5	2.90689	4.31161		2.25167
8.22192	3.67696	5.81378	5.51543	6.755	5.51543	5.36004	7.00071	2.6	7.6909		6.5	8.72067	4.68722	4.68722	2.6	5.36004	5.36004	6.62873	3.9	3.9		5.36004
8.32406	4.50333	5.36004	7.00071	7.00071	4.68722	5.36004	7.12039	2.6	7.00071		5.2	8.32406	3.9	6.62873	1.3	1.83848	5.66657	7.00071	2.90689	3.9		5.51543
7.8	2.90689	4.86415	7.00071	6.36867	4.86415	5.51543	7.46793	2.90689	7.8		5.51543	3.67696	3.9	5.36004	2.6	2.6	4.86415	6.5	5.51543	3.9		5.66657
8.42496	3.67696	4.50333	7.00071	5.66657	4.68722	5.51543	6.62873	2.6	7.00071		5.2	2.90689		4.68722	2.6	2.6	5.2	6.755	5.95735	2.90689		5.36004
8.42496	4.50333	4.11096	6.5	5.66657	5.36004	5.81378	6.5	7.12039	8.01374		6.755	7.8		6.36867	1.3	2.6	5.36004	7.12039	4.86415	3.67696		6.62873
8.62322	3.18434	5.51543	6.5		4.86415	5.95735	2.90689	5.51543	7.00071		5.36004	7.46793		5.36004	2.6	2.90689	5.51543	7.58024	5.36004	2.90689		6.5
8.32406	3.9	4.68722	6.36867		4.68722	5.36004	4.86415	2.6	7.6909		4.86415	6.5		5.2	2.6	2.90689	4.86415	8.22192	4.86415	3.67696		6.5
8.81703	4.50333	4.31161	4.68722		4.68722	5.51543	5.36004	2.6	7.00071		5.36004	3.18434		6.36867	1.3	3.9	5.51543	7.46793	4.68722	4.68722		2.90689
7.35391	3.18434	4.31161	5.51543		5.36004	5.51543	5.95735	2.90689	7.90759		5.36004	3.18434		5.95735	2.6	3.67696	5.36004	8.32406	4.86415	3.67696		5.36004
8.32406	3.9	4.50333	5.51543		4.68722	4.68722	6.36867	2.90689	7.00071		4.86415	3.67696		5.95735	2.6	2.90689	5.51543	8.72067	5.36004	4.68722		5.2
8.42496	3.9	4.31161	5.51543		4.50333	3.9	6.5	6.62873	7.8		8.62322	3.9		5.66657	2.6	2.6	5.51543	8.62322	4.86415	3.67696		4.86415
6.36867	4.50333	4.68722	5.36004		4.86415	4.86415	6.36867	5.51543	7.00071		4.11096	6.5		6.5	2.6	4.11096	5.36004	8.32406	4.31161	3.67696		5.51543
7.46793	3.9	4.11096	5.2		4.68722	5.66657	6.62873	4.68722	8.42496		8.72067	6.5		6.36867	1.83848	4.11096		8.22192	4.86415	4.68722		5.66657
8.22192	3.9	4.11096	4.68722		4.68722	4.11096	6.755	4.11096	7.00071		4.31161	6.62873		7.12039	2.6	4.68722		8.22192	4.50333	4.31161		5.51543
6.09754	4.31161	3.9	4.86415		4.68722	5.36004	7.12039	3.18434	8.01374		8.81703	6.62873		6.62873	2.25167	5.2		8.01374	4.31161	3.18434		5.36004
7.8	4.31161	5.36004	4.68722		4.68722	4.86415	7.46793	2.90689	7.00071		3.67696	5.81378		7.00071	2.6	4.86415		7.6909	4.86415	4.68722		3.18434
5.36004	3.9	4.68722	4.31161		4.31161	3.67696	7.6909	3.18434	8.52467		9.1	3.18434		7.00071	2.6	4.86415		7.58024	4.68722	4.11096		2.90689
5.66657	4.50333	4.31161	3.9		4.50333	3.67696	7.6909	3.9	6.62873		3.67696	2.90689		7.00071	2.6	2.6		7.58024	4.68722	3.18434		3.67696
6.62873	4.31161	4.68722	4.50333		4.68722	4.31161	2.90689	3.18434	7.90759		9.19239	3.18434		7.46793	2.6	5.51543		7.58024	4.68722	3.67696		4.31161
7.00071	4.31161	4.86415	4.11096		3.9	3.67696	5.36004	2.90689	6.5		3.18434	3.67696		7.00071	3.18434	5.36004		7.58024	4.68722	4.68722		4.86415
5.36004	4.50333	4.68722	4.50333		4.31161	4.31161	5.2	2.6	9.00666		9.1	3.67696		6.62873	3.67696	1.83848		7.12039	4.68722	3.67696		5.36004
6.5	3.67696	5.2	4.50333		3.9	3.67696	5.2	3.67696	6.5		3.67696	5.36004		6.5	3.67696	3.18434		7.00071	4.68722	4.68722		4.68722
5.36004	4.50333	5.66657	4.31161		3.9	2.90689	5.2	3.9	8.72067		9.1	5.2		6.62873	3.67696	2.90689		7.12039	4.68722	3.18434		4.31161
6.62873	4.50333	4.86415	4.86415		3.67696	4.68722	5.2	3.9	7.58024		2.90689	5.81378		6.755	2.90689	2.90689		7.46793	3.67696	5.36004		3.9
5.36004	4.50333	4.68722	4.68722		3.67696	3.67696	6.5	2.6	8.62322		9.37443	3.67696		6.62873	2.6	3.67696		7.58024	4.11096	5.36004		3.9
6.09754	4.50333	3.67696	4.68722		4.31161	2.90689	6.62873	2.6	7.58024		2.90689	3.18434		6.36867	2.6	3.9		7.46793	3.67696	3.67696		5.51543
5.66657	4.31161	4.11096	5.36004		2.90689	4.68722	6.5	2.6	8.32406		9.37443	3.9		5.81378	2.6	3.9		7.35391	4.11096	2.90689		5.66657
4.86415	4.86415	4.86415	4.68722		3.67696	2.90689	6.5	2.25167	7.58024		2.90689	3.9		6.36867		4.68722		7.00071	1.3	5.36004		5.66657
3.9	5.36004	6.36867	4.68722		3.9	3.67696	6.5	3.67696	7.90759		9.46414	3.67696		6.62873		5.2		7.00071	4.31161	5.36004		5.51543
4.86415	3.9	5.81378	4.68722		3.67696	4.68722	7.8	4.31161	7.58024		2.90689	5.51543		6.62873		5.2		6.5	1.83848	2.90689		5.36004
5.36004	5.36004	3.67696	5.36004		4.68722	2.90689	7.8	4.11096	8.72067		9.19239	5.2		6.5		5.51543		7.00071	4.86415	2.90689		4.86415
6.09754	3.9	5.36004	4.86415		3.18434	2.90689	7.8	2.6	8.32406		2.6	4.68722		7.00071		2.25167		6.62873	1.83848	5.36004		4.68722
5.36004	6.36867	5.51543	5.2		4.50333	4.31161	2.90689	2.6	8.81703		9.46414	4.68722		7.35391		5.81378		6.5	4.68722	5.51543		3.9
4.50333	3.9	3.67696	4.86415		3.9	2.90689	4.86415	1.83848	9.1		1.83848	4.86415		7.35391		5.36004		7.58024	2.6	2.6		3.9
3.67696	5.95735	4.68722	4.86415		3.18434	4.68722	6.62873	1.83848	8.32406		9.46414	5.36004		7.35391		5.2		7.35391	4.31161	2.6		6.62873
5.36004	4.31161	4.68722	5.36004		3.9	2.6	7.6909	4.31161	9.1		1.83848	4.68722		7.8		4.68722		7.35391	2.90689	1.83848		3.67696
5.36004	5.36004	3.9	5.36004		3.18434	2.90689	8.01374	4.31161	9.19239		9.46414	4.68722		8.32406		4.11096		6.5	4.31161	5.36004		6.5
5.66657	5.36004	3.18434	5.36004		3.9	4.68722	8.22192	2.6	7.58024		1.3	4.11096		8.32406		3.9		7.58024	3.67696	5.51543		6.09754
3.67696	5.36004	4.31161	5.66657		3.67696	2.90689	2.90689	2.6	9.72831		9.28386	3.9		8.32406		4.11096		7.46793	4.31161	1.83848		5.36004
5.51543	5.36004	3.67696	5.36004		2.90689	2.90689	4.11096	4.68722	8.62322		8.72067	5.51543		8.01374		4.86415		7.6909	4.11096	5.2		5.36004
5.36004	5.51543	3.67696	5.95735		4.31161	4.86415	4.68722	4.31161	8.81703		9.19239	5.36004		7.58024		5.2		5.95735	3.18434	5.36004		4.68722
3.9	4.86415	3.9	6.5		2.90689	1.3	7.8	4.31161	6.36867		5.36004	4.31161		7.90759		5.36004		6.09754	4.11096	4.86415		5.51543
5.51543	4.31161	3.67696	6.62873		3.67696	1.3	7.8	2.6	10.1533		4.68722	4.86415		8.01374		5.36004		6.36867	3.9	1.3		3.9
5.36004	4.86415	3.18434	6.62873		3.9	1.3	7.90759	4.86415	9.1		5.36004	4.86415		7.8		5.81378		6.755	4.11096	1.83848		6.36867
3.18434	4.50333	2.6	6.62873		3.18434	3.18434	2.90689	4.31161	9.1		4.86415	4.68722		7.00071		1.83848		6.755	3.9	4.86415		7.00071
5.51543	4.50333	3.18434	7.00071		3.18434	2.90689	3.9	2.6	5.2		4.86415	4.68722		7.35391		1.83848		7.46793	3.9	5.2		6.62873
5.36004	4.50333	2.90689	4.50333		3.18434	4.68722	7.8	4.50333	9.46414		4.86415	3.9		6.5		5.2		5.36004	3.67696	4.68722		4.11096
4.68722	3.67696	2.90689	5.95735		3.67696	3.18434	2.90689	4.68722	5.2		5.2	3.9		6.36867		4.86415		5.36004		4.11096		5.95735
3.67696	3.18434	3.67696	6.36867		3.67696	2.90689	3.9	2.6	9.72831		4.86415	4.50333		6.36867		5.36004		5.51543		1.3		6.755
5.36004	4.86415	2.6	5.66657		3.18434	3.67696	3.9	4.68722	5.2		5.36004	4.31161		6.36867		2.6		5.36004		4.68722		7.00071
3.9	3.18434	2.6	5.81378		3.67696	3.18434	7.8	4.68722	9.72831		4.86415	4.11096		5.66657		1.83848		5.36004		4.11096		3.9
3.9	3.67696	3.67696	5.36004		3.9	2.90689	2.6	2.25167	4.68722		4.86415	5.36004		5.2		4.68722		5.36004		4.11096		3.67696
2.90689	2.90689	2.6	5.2		3.18434	5.36004	3.67696	4.68722	9.98549		8.81703	5.36004		5.36004		4.86415		4.86415		4.31161		7.00071
3.67696	5.36004	3.67696	3.67696		3.67696	4.68722	8.72067	4.11096	4.11096		5.36004	5.2		5.36004		4.31161		5.36004		4.11096		3.9
5.36004	2.90689	2.90689	3.9		3.67696	4.11096	2.90689	1.83848	9.98549		5.2	4.68722		4.31161		4.68722		4.68722		3.9		7.00071
3.9	2.90689	3.9	4.31161		3.67696	4.68722	2.90689	4.31161	2.6		4.68722	5.2		4.68722		2.25167		5.36004		3.9		4.11096
2.90689	3.67696	3.9	3.9		2.90689	4.31161	3.67696	4.31161	9.19239		4.68722	5.36004		4.68722		4.31161		5.95735		4.31161		6.62873
4.86415	2.90689	3.67696	6.62873		3.67696	5.36004	7.90759	1.83848	3.67696		4.86415	5.2		4.86415		3.9		6.62873		4.11096		4.31161
4.31161	3.9	3.67696	5.95735		3.67696	4.68722	2.90689	1.3	9.37443		4.68722	5.2		4.31161		1.83848		7.00071		3.9		6.62873
4.68722	3.9	3.67696	2.90689		2.90689	4.68722	2.90689	4.31161	2.90689		8.72067	5.2		4.68722		4.50333		4.31161		4.11096		4.31161
5.36004	4.31161	3.67696	3.18434		2.90689	4.50333	6.755	1.83848	8.62322		4.11096	4.31161		4.11096		3.67696		4.68722		4.11096		4.68722
3.9	5.51543	3.9	3.18434		3.67696	3.9	2.90689	4.31161	2.6		4.68722	5.2		4.11096		4.11096		4.68722		3.9		6.36867
3.67696	5.66657	3.9	2.90689		3.67696	4.50333	6.36867	2.25167	8.72067		4.68722	5.36004		3.67696		1.3		4.68722		3.9		4.68722
5.36004	2.90689	3.9	3.18434		3.18434	3.9	3.67696	4.86415	8.42496		4.86415	5.81378		4.11096		1.83848		4.86415		4.31161		6.36867
3.67696	2.90689	3.67696	3.67696		3.67696	3.9	3.67696	5.51543	8.72067		4.31161	5.36004		3.9		1.83848		5.2		4.11096		4.68722
3.67696	2.90689	3.67696	6.09754		2.25167	3.9	2.90689	1.83848	8.32406		3.9	4.86415		3.18434		3.67696		5.2		3.9		6.36867
5.36004	5.36004	3.67696	3.18434		2.90689	3.67696	5.95735	1.83848	8.62322		9.19239	4.86415		3.9		3.67696		4.86415		4.31161		4.68722
3.9	4.86415	4.31161	5.95735		2.90689	2.90689	3.67696	5.36004	8.32406		3.67696	5.36004		3.67696		1.83848		5.36004		4.31161		5.36004
5.36004	6.09754	4.31161	3.67696		3.9	3.67696	5.36004	6.36867	8.42496		4.31161	6.36867		3.67696		4.50333		5.51543		3.9		4.31161
3.67696	2.90689	4.31161	5.36004		3.9	2.90689	5.36004	1.83848	8.01374		4.68722	6.36867		2.90689		3.67696		5.51543		4.31161		5.81378
5.36004	2.90689	4.11096	3.67696		2.25167	3.67696	5.2	7.00071	7.6909		4.68722	6.5		2.6		1.3		5.36004		4.68722		4.11096
5.51543	5.66657	4.11096	5.2		4.11096	3.67696	2.6	1.83848	7.90759		4.11096	6.5		2.6		4.50333		5.51543		3.67696		6.09754
3.67696	5.36004	3.9	4.86415		3.9	3.18434	3.18434	6.36867	7.46793		3.18434	4.11096		2.90689		3.18434		4.86415		4.68722		6.09754
2.90689	6.5	4.11096	3.67696		3.67696		4.50333	1.83848	7.6909		9.1	5.2		2.6		4.11096		5.36004		4.68722		6.36867
5.51543	2.90689	4.11096	5.51543		2.90689		4.86415	5.66657	7.46793		3.67696	4.86415		2.90689		3.18434		5.36004		4.31161		6.62873
5.51543	2.90689	4.11096	3.67696		3.67696		3.67696	1.83848	7.12039		4.11096	5.36004		2.90689		3.18434		4.86415		4.50333		6.62873
3.18434	6.5	4.11096	5.81378		3.67696		3.9	1.83848	7.46793		3.67696	5.36004		2.6		4.68722		5.36004		3.9		6.62873
5.66657	2.90689	4.11096	2.90689		4.11096		1.3	5.36004	8.22192		9.1	5.36004		2.6		3.67696		5.2		3.67696		6.36867
2.90689	5.95735	4.11096	5.66657		3.9		1.83848	1.83848	8.22192		3.18434	4.86415		2.90689		4.11096		5.36004		4.11096		5.66657
2.90689	2.90689	4.11096	3.67696		3.67696		1.83848	4.68722	8.32406		3.9	5.36004		2.6		3.67696		5.36004		3.67696		5.36004
5.36004	2.90689	4.11096	5.36004		3.18434		1.83848	1.83848	8.22192		3.67696	5.36004		2.6		3.9		2.90689				4.86415
5.95735	6.36867	4.11096	2.90689		3.67696		1.83848	1.3	8.01374		3.9	5.51543		2.6		3.18434		3.67696				5.66657
2.90689	2.90689	4.11096	5.36004		4.31161		4.31161	4.11096	8.22192		3.18434	5.36004		2.6		4.31161		3.67696				5.36004
6.36867	2.90689	3.9	2.90689		4.11096		2.6	1.83848	8.01374		8.81703	5.66657		2.90689		2.90689		3.67696				5.36004
5.36004	2.90689	3.9	5.36004		2.90689		2.6	4.68722	8.22192		3.9	4.86415		2.90689		3.9		3.9				5.36004
2.25167	6.5	3.9	3.67696		2.90689		2.6	1.83848	1.3		3.9	6.755		2.6		2.90689		3.9				5.36004
2.90689	2.90689	3.67696	4.86415		3.67696		2.6	4.11096	8.01374		3.67696	7.00071		2.90689		3.9		4.68722				5.36004
2.6	2.25167	3.67696	3.18434		3.9		2.6	1.83848	1.3		2.90689	7.46793		2.90689		2.90689		3.67696				4.68722
6.36867	6.36867	3.18434	4.68722		3.67696		2.6	3.9	7.90759		8.01374	7.46793		2.90689		2.90689		4.11096				4.50333
5.51543	1.83848	3.18434	3.18434		3.18434		2.6	1.83848	1.83848		3.9	7.00071		3.18434		4.11096		4.31161				4.50333
2.90689	5.36004	3.18434	4.31161		3.67696		2.90689	3.67696	7.90759		4.11096	5.36004		3.67696		2.6		4.11096				4.31161
6.36867	1.83848	3.18434	3.67696		3.67696		2.90689	1.83848	2.6		4.11096	4.86415		3.67696		4.31161		4.11096				4.50333
5.95735	1.83848	3.67696	3.9		3.9		3.18434	2.90689	7.8		3.67696	7.35391		3.67696		2.90689		4.31161				4.50333
2.90689	5.51543	3.18434	3.18434		3.9		1.3	1.3	2.6		7.90759	7.00071		3.67696		3.9		4.11096				4.31161
2.90689	1.83848	3.18434	3.9		3.67696		1.83848	2.6	8.22192		3.67696	7.35391		3.18434		2.6		4.11096				3.9
5.51543	1.83848	3.67696	3.67696		3.9		1.3	2.6	2.6		3.67696	6.62873		3.67696		3.9		3.9				3.67696
5.36004	1.83848	3.67696	3.9		3.67696		1.3	2.6	7.12039		3.67696	7.12039		2.6		2.25167		3.67696				3.9
5.95735	5.51543	3.18434	3.67696		3.67696		1.3	2.6	2.6		4.11096	7.00071		3.67696		3.67696		3.67696				3.9
5.51543	1.83848	3.18434	4.31161		3.67696		1.3	2.6	7.00071		4.31161	6.5		3.67696		2.25167		3.67696				3.9
2.90689	1.83848	3.67696	2.90689		3.18434		3.67696	2.90689	2.6		4.68722	5.51543		3.67696		3.67696		3.67696				3.67696
2.90689	1.83848	3.67696	4.68722		3.67696		3.9	2.6	7.46793		2.6	6.36867		3.67696		1.83848		3.67696				3.9
5.36004	1.83848	3.18434	3.67696		4.50333		3.67696	2.25167	2.6		3.18434	5.95735		3.67696		4.50333		3.18434				3.9
4.86415	5.2	3.18434	4.68722		3.67696		1.3		7.46793		7.8	5.81378		3.9		1.83848		3.9				3.9
5.66657	2.6	3.18434	2.90689		3.67696				3.18434		3.67696	5.36004		3.67696		4.50333		5.2				3.67696
3.18434	2.25167	3.67696	4.11096		3.67696				7.00071		3.67696	4.68722		3.67696		2.25167		5.36004				3.67696
5.36004	1.83848	3.9	2.90689		3.67696				3.9		3.9	5.36004		3.9		1.83848		5.36004				3.67696
3.18434	5.51543	3.67696	5.51543		3.18434				7.00071		3.9	5.51543		4.11096		4.31161		5.36004				3.67696
2.90689	2.90689	3.9	5.51543		3.67696				4.11096		3.67696	5.51543		4.11096		2.6		5.36004				3.67696
3.9	2.90689	3.67696	5.51543		4.50333				6.5		3.67696	4.68722		4.31161		3.9		5.36004				3.67696
4.68722	5.36004	3.67696	5.51543		3.67696				4.31161		3.67696	5.51543		4.11096		2.90689		4.86415				3.9
4.86415	2.90689	3.67696	6.36867		3.67696				7.00071		3.9	5.36004		3.9		3.9		3.67696				3.9
4.31161	5.51543	2.90689	5.51543		3.67696				4.86415		4.11096	5.36004		4.11096		2.90689		4.11096				3.9
2.90689	5.51543	3.18434	5.81378		2.90689				7.00071		2.90689	4.68722		4.11096		3.67696		4.68722				3.67696
4.11096	5.66657	2.90689	5.66657		4.11096				5.51543		3.18434	5.36004		4.31161		5.2		4.68722				3.18434
3.18434	6.09754	2.90689	5.51543		3.67696				6.62873		3.67696	4.68722		4.31161		3.67696						3.67696
2.90689	6.36867	3.18434	4.68722		3.67696				5.95735		7.8	5.36004		4.31161		4.31161						3.67696
	5.95735	2.90689	4.68722		2.90689				6.36867		2.90689	4.68722		4.31161		5.2						3.67696
	6.36867	2.90689	4.68722		4.50333				6.36867		3.18434	4.86415		3.9		4.86415						3.67696
	6.36867	2.90689	4.31161		3.67696				6.5		3.67696	5.36004		4.31161		4.11096						3.67696
	5.95735	2.90689	4.31161		3.67696				5.95735		3.67696	4.86415		3.9		3.9						3.67696
	5.81378	2.25167	4.50333		2.90689				6.36867		3.67696	5.51543		3.9		5.51543						3.18434
	5.81378	1.83848	3.9		2.90689				6.09754		4.11096	5.36004		3.67696		4.50333						3.18434
	7.00071	1.83848	4.50333		4.11096				6.62873		3.67696	5.51543		3.9		5.36004						3.67696
	6.755	1.83848	3.9		3.67696				6.09754		3.9	5.81378		3.67696		4.50333						3.9
	7.46793		3.9		3.18434				5.66657		7.8	5.36004		3.67696		4.31161						3.9
	7.46793		3.9		3.67696				6.62873		3.67696	3.9		3.9		3.9						3.9
	8.22192		4.50333		3.18434				5.66657		3.67696	3.67696		3.67696		4.50333						3.9
	8.32406		3.9		2.90689				5.66657		3.9	3.67696		2.90689		4.50333						3.9
	8.22192		3.9		2.90689				5.51543		4.11096	3.18434		3.67696		4.50333						3.67696
	8.22192		4.50333		3.67696				6.36867		4.68722	2.90689		3.9		4.86415						3.18434
	8.72067		4.50333		3.67696				5.66657		4.31161	4.68722		3.67696		2.6						3.18434
	8.72067		4.50333		3.67696				5.51543		7.12039	4.68722		3.67696		1.83848						3.67696
	8.72067		3.9		3.18434				6.5		6.36867	4.68722		3.18434		2.25167						3.67696
	8.72067		4.31161		2.90689				5.95735		3.9	4.68722		3.67696		2.90689						3.67696
	8.72067		3.67696		2.90689				6.36867		3.9	2.6		3.67696		3.67696						3.67696
	9.28386				3.9				5.51543		4.11096	2.6		3.67696		3.67696						3.67696
	8.72067				3.67696				5.36004		4.31161	2.6		3.67696		4.50333						3.67696
	9.55301				3.67696				6.36867		1.3	2.6		3.18434		4.68722						3.67696
	9.19239				3.67696				5.66657		4.86415	2.6		3.67696		4.68722						3.67696
	9.28386				3.67696				5.81378		5.81378	2.6		2.90689		4.11096						3.9
	8.81703				3.67696				5.51543		5.36004	2.6		3.18434		4.68722						3.9
	9.19239				3.67696				4.86415		5.95735	2.6		2.90689		4.31161						3.9
	8.01374				3.67696				6.62873		5.95735	2.6		2.90689		3.9						3.9
	8.32406				3.18434				5.95735		5.81378	2.6		2.90689		4.31161						3.9
	8.22192				3.18434				5.66657		5.81378	2.6				3.9						3.67696
	7.46793				3.67696				5.36004		5.95735	5.2				3.67696						3.67696
	7.35391				3.18434				4.86415		6.36867	2.6				3.9						3.67696
	6.5				2.90689				7.00071		6.5	2.6				3.9						3.18434
	6.62873				2.90689				5.81378		4.68722	2.6				3.9						3.18434
	6.5				2.25167				5.2		4.11096	2.6				4.68722						2.90689
	6.62873				2.25167				4.68722		3.9	2.6				4.68722
	6.09754				1.83848				4.31161		1.3	2.6				4.86415
	6.5				1.83848				4.11096		1.3	2.6				4.50333
	6.36867								4.11096		1.83848	2.6				4.31161
	5.95735								7.12039		1.83848	2.6
	6.62873								5.51543		2.6	5.36004
	6.36867								4.31161		1.83848	2.6
	6.62873								4.68722		2.6	2.6
	6.62873								4.68722		4.11096	2.6
	6.36867								7.00071		3.9	2.6
	6.62873								5.36004		3.18434	2.6
	6.5								4.31161		2.90689	2.90689
	6.62873								4.68722		4.68722	2.90689
	6.755								4.31161		5.36004	2.90689
	6.62873								7.46793		6.36867	2.90689
	7.00071								5.36004		6.5	3.18434
	7.00071								4.68722		6.36867	3.18434
	7.00071								4.86415		5.95735	5.36004
	6.5								7.58024		5.66657	2.6
	6.36867								7.46793		5.51543	2.6
	7.00071								7.35391		5.51543	2.90689
	6.62873								7.35391		5.36004	3.18434
	6.755								7.35391		5.36004	3.18434
	6.5								7.35391		5.36004	4.68722
	5.66657								5.36004		5.36004	2.6
	6.09754								5.51543		1.3	2.90689
	6.09754								5.66657		1.3	3.18434
	5.66657								5.95735		1.3	2.90689
	5.66657								6.36867		1.3	2.90689
	4.86415								6.5		1.3	4.68722
	4.86415								6.62873		1.3	2.90689
	5.36004								6.5		1.3	2.90689
	5.36004								6.5			3.18434
	4.68722								8.22192			3.67696
	4.50333								8.32406			5.2
	4.31161								8.22192			2.90689
	4.50333								8.22192			3.18434
	3.67696								7.90759			3.67696
	3.9								7.8			2.90689
	3.9								7.46793			3.18434
	3.18434								7.12039			3.67696
	3.9								7.00071			3.67696
	3.67696								5.36004			4.11096
	3.67696								5.51543			2.90689
	3.67696								6.755			3.18434
	3.67696								7.12039			3.67696
	3.67696								6.5			2.90689
	3.67696								6.755			3.18434
	3.67696								6.5			3.67696
	3.9								5.51543			4.11096
	3.67696								4.68722			2.90689
	3.67696								5.36004			3.18434
	3.9								5.51543			2.6
	3.67696								5.2			4.68722
	3.67696								4.86415			2.90689
	3.67696								4.86415			3.18434
	3.67696								4.68722			2.90689
	3.67696								4.11096			4.68722
	3.9								3.67696			2.90689
	3.67696								5.36004			2.90689
	3.67696								4.68722			2.6
	3.67696								4.11096			4.86415
	3.67696								3.67696			2.90689
	3.67696								6.36867			2.90689
	3.67696								4.31161			3.18434
	3.67696								4.31161			3.67696
	3.67696								3.9			3.67696
	3.67696								6.62873			4.86415
	3.67696								3.9			3.18434
	3.67696								3.9			3.67696
	3.67696								3.9			3.67696
	3.67696								6.09754			3.67696
	3.67696								6.36867			3.67696
	3.67696								3.67696			3.67696
	3.67696								3.67696			4.86415
	3.67696								3.18434			3.18434
	3.67696								3.67696			3.67696
	3.67696								6.36867			3.67696
	3.67696								5.95735			3.9
	3.18434								3.67696			3.9
	2.90689								3.18434			3.67696
	3.67696								3.67696			3.9
	3.18434								6.36867			4.11096
	2.90689								3.9			4.11096
	2.90689								2.90689			3.9
	2.90689								2.90689			3.67696
	2.25167								3.67696			3.67696
	1.83848								6.62873			4.86415
									3.18434			3.9
									3.18434			3.9
									3.18434			3.67696
									3.18434			3.67696
									2.90689			2.90689
									2.90689			2.90689
									2.6			5.51543
									6.5			2.90689
									5.95735			2.90689
									3.18434			2.6
									6.36867			5.66657
									6.36867			5.66657
									3.67696			6.5
									6.62873			6.5
									6.36867			4.86415
									3.67696			6.09754
									6.5			6.62873
									3.18434			7.00071
									6.5			2.90689
									6.36867			3.9
									3.67696			4.31161
									6.5			4.86415
									4.11096			5.36004
									5.81378			5.36004
									3.67696			6.36867
									6.36867			2.6
									5.95735			2.90689
									4.11096			3.67696
									6.5			3.67696
									4.86415			5.51543
									6.5			3.18434
									4.86415			3.67696
									6.36867			4.11096
									6.36867			2.90689
									4.86415			3.18434
									5.95735			3.67696
									5.51543			4.11096
									6.36867			2.90689
									4.86415			3.9
									6.36867			2.90689
									5.2			3.18434
									6.36867			2.90689
									5.95735			3.67696
									5.51543			2.90689
									5.95735			3.67696
									4.86415			3.18434
									6.36867			3.18434
									5.2			3.18434
									6.36867			2.6
									5.36004			2.90689
									5.51543			2.90689
									4.86415			3.9
									5.2			2.90689
									5.36004			3.67696
									4.68722			2.6
									5.2			2.90689
									5.2			2.90689
									5.2			2.90689
									4.68722			2.6
									5.2			2.6
									5.2			3.67696
									4.86415			2.90689
									4.68722			3.67696
									3.9			3.18434
									3.9			3.9
									3.9			3.67696
									3.9			3.18434
									3.9			3.18434
									3.9			3.67696
									4.11096			3.67696
									2.90689			3.18434
									3.18434			3.67696
									3.67696			3.67696
									3.9			3.67696
									3.9			3.67696
									3.9			3.9
									2.6			3.67696
									2.90689			3.18434
									2.90689			3.67696
									3.67696			3.9
									3.67696			3.67696
									3.67696			3.9
									3.67696			4.11096
									3.67696			3.9
									3.67696			4.11096
									2.6			4.11096
									2.6			4.31161
									2.90689			4.50333
									3.18434			4.31161
									3.67696			4.11096
									2.90689			4.11096
									2.90689			4.68722
												4.50333
												4.50333
												4.31161
												4.50333
												4.31161
												4.31161
												3.9
												3.67696
												3.67696
												3.9
												3.9
												4.31161
												4.31161
												1.83848
												1.83848
												2.90689
												2.6
												3.9
												4.31161
												3.9
												3.9
												3.18434
												3.9
												3.9
												3.9
												3.9
												3.9
												3.9
												3.18434
												3.67696
												3.9
												3.67696
												3.9
												2.90689
												2.90689
												2.90689
												2.90689
												2.90689
												2.90689
												3.9
												3.9
												2.90689
												3.67696
												3.18434
												3.9
												3.9
												3.9
												2.90689
												3.9
												3.18434
												3.67696
												3.18434
												3.67696
												2.90689
												3.18434
												3.18434
												2.90689

## Sheet: Y25_72set2_th
diam_42	diam_127	diam_212	diam_255	diam_170	diam_85	diam_218	diam_145	diam_72	diam_36	diam_109	diam_254	diam_182	diam_68	diam_102	diam_51	diam_34	diam_221	diam_204	diam_187	diam_17	diam_119	diam_153	diam_136	diam_238	diam_255.1	diam_170.1	diam_85.1
2.6	2.90689	4.31161	4.31161	4.68722	4.11096	2.90689	3.18434	2.6	4.68722	2.90689	1.83848	3.9	3.67696	2.90689	3.18434	1.3	4.31161	1.83848	2.90689	3.67696	2.90689	2.6	1.83848	5.36004	1.3	1.83848	2.90689
2.6	3.67696	4.68722	3.9	4.11096	5.36004	2.6	3.67696	2.90689	5.36004	2.90689	2.25167	3.9	3.67696	2.90689	3.67696	1.3	3.67696	1.3	3.18434	3.18434	2.25167	2.6	1.3	5.81378	1.3	2.25167	3.18434
2.90689	2.90689	4.11096	4.11096	4.31161	5.2	3.18434	3.67696	3.18434	5.36004	3.18434	2.25167	3.9	3.18434	2.90689	3.67696	1.3	3.67696	1.83848	3.67696	2.90689	2.25167	2.6	1.83848	5.51543	1.3	2.90689	3.67696
3.18434	2.90689	4.86415	4.11096	4.11096	5.36004	2.6	2.90689	3.67696	4.68722	3.67696	1.83848	3.9	3.67696	3.18434	3.18434	1.83848	4.50333	2.25167	4.11096	2.90689	1.3	2.6	1.3	5.51543	1.3	2.90689	3.67696
2.90689	2.90689	4.31161	3.9	4.31161	5.36004	2.25167	2.90689	3.18434	5.36004	3.67696	2.6	3.67696	2.90689	2.90689	2.90689	1.3	3.9	1.83848	4.11096	3.67696	1.3	2.6	1.3	5.36004	1.3	2.90689	3.67696
2.90689	2.6	4.11096	3.9	3.9	5.36004	1.3	2.90689	3.67696	5.36004	3.67696	2.6	3.18434	2.90689	3.18434	2.6	1.3	4.31161	4.50333	4.11096	2.6	1.83848	2.25167	1.83848	5.66657	1.83848	2.6	4.31161
2.6	2.90689	3.9	3.9	4.31161	5.36004	1.3	2.90689	3.18434	4.86415	2.6	2.90689	3.67696	2.90689	2.90689	2.6	1.83848	4.31161	2.6	4.11096	3.9	1.3	2.6	2.25167	5.66657	1.83848	2.90689	3.67696
3.18434	3.67696	5.2	3.9	4.11096	5.81378	1.3	3.18434	2.6	5.36004	2.90689	2.90689	2.6	2.90689	3.67696	2.6	2.6	4.31161	2.25167	4.11096	3.9	1.83848	2.6	2.90689	4.86415	1.83848	2.6	4.31161
3.9	2.6	4.86415	2.6	3.67696	5.36004	1.3	3.18434	2.90689	4.68722	2.90689	2.90689	1.83848	2.90689	3.18434	2.25167	2.6	4.50333	4.31161	4.11096	3.67696	1.83848	2.25167	2.90689	3.18434	2.25167	2.90689	3.67696
3.18434	3.9	4.68722	2.6	4.11096	3.67696	2.90689	2.6	3.18434	4.86415	3.9	2.25167	1.3	3.18434	3.67696	2.6	2.90689	4.68722	3.18434	4.11096	3.9	2.25167	2.90689	2.90689	3.67696	2.25167	2.6	4.50333
3.18434	2.25167	4.11096	2.90689	4.11096	4.86415	1.3	2.90689	2.90689	4.68722	3.67696	2.90689	1.3	3.18434	3.67696	1.83848	2.6	4.68722	4.11096	4.31161	4.11096	1.83848	2.90689	3.67696	3.67696	2.25167	2.90689	3.67696
3.67696	4.31161	4.11096	3.67696	3.67696	4.68722	2.90689	3.67696	2.90689	4.86415	4.11096	2.90689	2.6	2.90689	3.67696	2.25167	3.18434	4.86415	3.9	4.68722	4.31161	2.6	2.90689	4.31161	3.67696	2.90689	2.90689	4.50333
3.67696	2.25167	4.68722	3.18434	4.11096	4.68722	1.3	4.86415	3.67696	4.68722	3.18434	2.6	2.6	3.18434	3.9	2.25167	3.18434	4.68722	3.9	4.68722	4.11096	2.6	2.6	2.6	3.9	2.6	2.25167	3.67696
3.67696	4.68722	5.2	3.18434	3.9	5.81378	3.18434	4.31161	3.67696	5.36004	4.31161	3.18434	2.6	2.90689	3.18434	2.6	3.18434	4.68722	3.9	4.31161	4.11096	2.6	1.3	2.90689	4.11096	3.67696	2.90689	3.9
3.67696	2.25167	4.86415	2.6	3.18434	4.11096	2.90689	4.86415	3.9	4.68722	3.18434	2.90689	2.90689	3.18434	3.18434	2.25167	2.90689	5.36004	2.6	4.86415	4.11096	2.90689	3.67696	2.90689	4.86415	4.31161	2.6	3.9
2.90689	4.11096	5.36004	2.6	4.11096	3.9	3.67696	4.68722	3.9	5.36004	4.31161	2.90689	2.6	2.90689	3.18434	2.6	4.11096	5.51543	2.90689	4.68722	3.9	2.90689	2.25167	4.68722	2.90689	5.36004	2.90689	3.9
2.6	2.25167	5.36004	2.90689	4.31161	4.31161	2.90689	3.18434	3.67696	4.68722	3.18434	3.67696	2.90689	2.25167	3.67696	2.6	1.3	5.51543	5.36004	4.86415	3.9	2.90689	2.90689	2.6	3.18434	5.66657	2.90689	4.68722
1.3	4.86415	5.81378	3.18434	4.11096	5.36004	2.90689	4.68722	3.9	5.36004	4.11096	2.90689	2.6	3.67696	2.90689	2.6	1.83848	5.36004	4.86415	5.36004	2.6	2.6	2.90689	2.90689	2.90689	5.95735	3.18434	4.11096
2.90689	2.25167	5.81378	2.90689	4.11096	3.9	2.90689	4.86415	3.9	4.68722	3.67696	2.90689	2.90689	2.6	3.67696	2.6	2.90689	5.2	5.2	5.36004	2.6	2.6	2.90689	3.67696	3.67696	5.66657	3.9	3.67696
1.83848	4.86415	6.36867	2.90689	4.31161	4.68722	3.18434	4.86415	2.90689	5.36004	4.31161	3.67696	2.6	3.67696	3.67696	2.90689	3.67696	5.36004	5.51543	5.36004	2.6	3.18434	3.18434	3.18434	3.18434	6.62873	3.18434	4.31161
2.90689	2.25167	5.95735	3.18434	4.31161	5.66657	2.90689	4.68722	3.67696	4.68722	3.18434	3.67696	2.90689	3.67696	3.18434	2.90689	4.11096	4.68722	5.2	3.18434	2.25167	3.18434	2.90689	2.90689	2.90689	7.00071	2.90689	4.31161
2.25167	4.31161	6.5	3.67696	2.90689	5.36004	3.18434	4.68722	4.11096	4.11096	4.68722	1.3	2.6	3.67696	3.67696	2.90689	1.3	4.68722	4.11096	4.86415	1.83848	3.18434	3.18434	4.68722	3.9	5.36004	3.18434	3.67696
3.18434	2.6	6.5	2.90689	4.11096	4.11096	2.90689	5.2	3.67696	4.86415	2.90689	3.67696	2.90689	3.9	3.18434	2.90689	1.83848	4.68722	5.81378	2.90689	1.83848	3.18434	3.67696	5.36004	4.31161	4.86415	4.11096	5.36004
2.25167	4.68722	6.36867	3.67696	3.9	5.66657	3.67696	5.2	3.67696	4.31161	4.68722	3.67696	2.6	4.11096	3.18434	2.90689	4.31161	4.68722	5.81378	4.86415	1.3	3.18434	3.67696	2.6	4.31161	4.68722	3.67696	3.18434
2.90689	3.18434	6.5	3.9	3.9	3.9	2.90689	5.36004	3.9	5.36004	3.67696	1.83848	2.90689	4.31161	3.18434	2.90689	3.9	4.86415	5.81378	4.11096	1.3	3.18434	3.18434	2.6	5.51543	4.31161	3.18434	4.11096
2.90689	4.31161	6.36867	3.18434	4.11096	4.68722	3.67696	5.36004	3.9	4.31161	4.31161	3.67696	2.6	3.9	3.9	3.18434	1.3	4.31161	5.81378	3.67696	1.3	5.81378	2.6	2.6	2.6	4.11096	2.90689	5.36004
2.6	2.90689	5.81378	3.9	3.9	5.66657	3.67696	3.18434	3.9	5.2	2.90689	3.67696	2.90689	4.50333	3.9	2.90689	1.3	4.31161	5.95735	4.68722	4.11096	5.36004	3.67696	2.6	2.90689	4.11096	3.9	4.11096
3.67696	3.67696	6.36867	4.11096	4.31161	3.18434	2.90689	4.68722	3.67696	4.68722	3.9	1.83848	2.90689	4.11096	3.67696	2.6	1.3	4.68722	5.36004	2.6	4.11096	4.86415	3.67696	2.6	2.90689	3.9	3.67696	5.36004
2.6	3.67696	6.36867	3.9	4.68722	2.6	3.67696	4.68722	3.9	4.68722	2.6	2.90689	2.6	4.50333	3.9	2.25167	4.11096	4.31161	5.36004	2.90689	3.67696	5.2	2.90689	4.11096	2.6	3.18434	2.90689	4.86415
3.67696	3.67696	6.36867	3.9	3.9	2.6	3.67696	4.86415	3.67696	4.68722	3.67696	2.90689	2.90689	3.9	3.67696	2.25167	4.11096	4.11096	5.51543	4.68722	2.90689	4.68722	2.90689	4.11096	2.6	6.36867	3.18434	4.50333
2.90689	3.67696	6.5	4.11096	3.9	1.83848	3.18434	5.36004	3.9	4.31161	2.90689	2.25167	2.90689	3.9	2.6	2.6	1.3	4.68722	5.51543	1.3	2.6	5.2	3.9	2.90689	3.9	2.90689	4.11096	5.36004
2.6	3.18434	6.36867	3.67696	3.9	4.11096	3.67696	5.81378	3.9	5.36004	3.18434	3.18434	3.18434	3.9	2.6	3.67696	1.3	4.50333	5.36004	3.67696	4.68722	2.6	3.67696	2.6	5.2	3.18434	3.9	3.9
4.11096	4.31161	6.5	3.67696	4.11096	5.36004	3.18434	5.81378	4.11096	4.31161	2.90689	3.18434	2.90689	3.9	2.6	2.6	2.90689	4.31161	4.68722	4.68722	3.67696	5.2	3.67696	2.6	4.68722	3.67696	3.67696	4.86415
2.6	2.90689	6.36867	3.67696	4.68722	2.6	3.67696	5.66657	2.90689	4.31161	3.67696	1.83848	3.67696	3.67696	2.90689	3.9	1.3	4.68722	4.68722	1.3	3.9	2.90689	3.9	8.22192	4.11096	3.67696	3.67696	3.67696
2.90689	4.68722	6.62873	3.18434	4.68722	1.83848	3.18434	5.81378	2.90689	5.36004	2.90689	2.25167	3.67696	3.9	2.90689	3.9	4.31161	4.86415	4.68722	3.67696	4.31161	4.68722	3.18434	8.22192	4.86415	2.90689	4.31161	5.36004
4.68722	2.90689	6.755	2.90689	4.31161	4.68722	3.18434	5.95735	4.50333	4.31161	3.67696	3.67696	3.67696	4.11096	2.90689	2.6	2.25167	4.68722	4.68722	4.68722	3.18434	4.68722	3.9	8.01374	5.2	5.95735	4.11096	3.67696
2.90689	4.86415	6.62873	2.90689	4.68722	5.95735	2.90689	3.67696	2.90689	5.36004	3.18434	2.90689	3.67696	3.67696	2.6	4.31161	1.3	4.68722	4.68722	1.3	3.67696	4.31161	3.67696	8.22192	2.25167	2.90689	3.67696	5.51543
3.67696	2.6	6.5	3.67696	4.31161	2.6	3.67696	4.68722	3.18434	4.86415	3.18434	2.6	3.9	3.9	2.90689	2.6	2.90689	4.86415	5.36004	3.9	3.67696	3.18434	3.67696	7.90759	1.83848	2.90689	4.11096	4.68722
4.68722	5.66657	6.5	3.18434	4.31161	1.83848	3.67696	4.31161	2.90689	4.86415	2.90689	2.6	4.11096	3.9	3.18434	2.6	4.68722	5.36004	1.83848	4.50333	3.18434	4.11096	3.9	7.8	2.90689	3.9	3.9	3.9
2.6	3.18434	6.5	2.90689	3.9	4.86415	3.18434	5.81378	2.90689	5.2	3.67696	3.67696	4.31161	3.9	2.90689	2.6	5.36004	4.31161	5.51543	3.18434	2.90689	3.9	3.9	3.67696	2.6	3.67696	4.31161	3.67696
3.9	5.81378	6.5	3.9	4.68722	4.68722	2.6	6.5	4.11096	5.51543	3.18434	2.90689	3.9	1.83848	3.18434	4.68722	3.9	5.36004	2.6	3.67696	2.90689	3.18434	3.18434	3.18434	2.6	2.90689	3.67696	4.68722
5.36004	3.18434	6.62873	2.90689	3.67696	5.81378	2.6	4.31161	3.67696	5.66657	3.18434	2.90689	4.31161	2.25167	4.68722	3.18434	4.68722	4.86415	2.90689	4.68722	3.67696	4.68722	3.9	3.9	3.67696	2.6	4.11096	3.9
2.90689	5.95735	6.36867	4.11096	3.9	2.6	3.18434	4.31161	2.6	5.36004	3.67696	2.90689	4.50333	2.90689	4.68722	3.18434	4.31161	5.51543	3.18434	4.86415	3.18434	3.67696	3.9	8.01374	3.18434	5.66657	4.86415	4.86415
4.68722	3.67696	6.5	3.9	3.67696	2.6	3.67696	6.5	3.18434	5.95735	2.6	2.90689	4.31161	2.90689	4.68722	3.18434	4.86415	5.51543	2.6	2.90689	3.18434	4.68722	3.9	7.6909	4.31161	5.36004	3.67696	4.31161
4.86415	5.81378	6.5	3.67696	4.31161	5.81378	3.67696	6.5	2.90689	5.66657	3.67696	2.90689	4.31161	2.90689	4.86415	3.18434	2.90689	5.36004	2.25167	4.86415	3.18434	3.9	4.11096	7.58024	4.68722	2.6	4.68722	4.86415
3.18434	4.50333	6.5	3.9	2.90689	5.66657	2.6	6.36867	4.50333	5.36004	3.67696	2.6	4.68722	2.90689	5.36004	4.68722	4.68722	5.66657	1.83848	3.67696	3.67696	4.68722	3.9	7.12039	4.68722	3.9	5.36004	3.9
4.68722	3.9	6.5	3.9	3.67696	2.90689	3.18434	4.68722	2.90689	5.95735	3.18434	2.6	4.86415	3.9	5.51543	5.36004	4.68722	5.36004	5.36004	4.68722	3.18434	3.67696	1.3	7.46793	3.9	3.67696	3.67696	4.50333
2.6	5.81378	6.5	3.67696	4.31161	2.6	2.90689	4.11096	2.90689	5.81378	3.67696	2.6	4.68722	4.11096	5.95735	3.9	4.68722	5.81378	4.11096	2.90689	3.67696	4.11096	1.83848	7.46793	3.67696	3.9	4.11096	4.50333
5.36004	5.66657	7.12039	2.90689	3.67696	2.6	2.6	3.9	2.6	5.95735	3.67696	2.90689	4.68722	3.67696	5.95735	3.67696	1.3	5.51543	4.31161	4.68722	3.67696	4.68722	1.83848	7.46793	3.18434	3.67696	4.50333	4.50333
3.18434	5.51543	7.00071	5.95735	4.68722	2.25167	2.90689	4.31161	2.6	6.36867	3.67696	3.18434	4.68722	1.83848	5.81378	3.67696	5.2	5.51543	3.9	3.67696	3.67696	3.67696	1.83848	7.12039	2.6	5.36004	5.51543	3.9
5.51543	4.86415	7.46793	5.81378	3.18434	2.25167	2.90689	4.31161	2.90689	5.95735	3.67696	1.83848	5.36004	4.11096	6.5	3.18434	4.86415	6.09754	5.66657	4.68722	2.90689	3.67696	4.68722	7.00071	2.90689	4.11096	5.36004	4.11096
3.18434	5.81378	7.46793	5.81378	4.68722	2.90689	2.6	5.81378	2.90689	5.95735	3.67696	3.18434	1.83848	3.67696	6.5	5.51543	4.68722	5.66657	4.68722	3.67696	3.18434	4.68722	3.9	7.12039	4.11096	3.9	5.2	4.86415
5.51543	5.95735	7.90759	4.68722	3.18434	3.67696	2.90689	4.68722	2.90689	6.36867	3.67696	3.18434	1.83848	1.3	6.5	5.51543	1.3	5.81378	5.36004	4.68722	3.9	2.90689	1.83848	7.00071	4.11096	3.9	3.67696	4.11096
2.90689	6.36867	8.01374	4.68722	2.90689	4.31161	2.90689	3.67696	4.68722	5.95735	3.18434	2.6	1.3	2.6	6.36867	4.11096	4.68722	5.81378	4.68722	3.67696	3.67696	4.50333	2.25167	6.62873	3.9	4.86415	4.11096	5.36004
5.36004	6.36867	7.46793	4.68722	4.11096	5.36004	2.90689	3.67696	3.67696	6.5	3.18434	2.90689	2.25167	4.11096	5.81378	2.90689	4.86415	4.86415	5.81378	4.68722	3.9	3.18434	2.6	6.36867	3.67696	4.31161	5.51543	3.18434
3.18434	5.95735	7.6909	4.68722	3.18434	5.81378	3.18434	3.9	4.11096	5.36004	2.90689	3.67696	4.86415	1.3	5.81378	3.67696	5.36004	4.68722	4.86415	3.18434	4.11096	4.50333	2.6	5.36004	3.67696	4.11096	3.67696	3.9
5.51543	5.81378	8.01374	3.9	3.67696	5.51543	2.6	3.67696	2.90689	4.68722	3.67696	2.25167	3.9	1.3	5.81378	4.11096	5.36004	4.86415	4.68722	4.11096	3.9	3.67696	4.68722	3.9	3.18434	4.86415	4.68722	5.66657
2.90689	5.51543	8.32406	2.90689	4.68722	5.51543	3.67696	4.11096	3.67696	4.11096	2.90689	3.67696	4.11096	1.3	5.2	3.9	2.90689	4.68722	5.95735	2.90689	3.67696	3.67696	3.67696	3.67696	2.90689	4.31161	4.68722	3.67696
5.36004	5.81378	8.01374	2.90689	3.67696	5.51543	2.6	5.36004	3.9	3.9	3.67696	3.9	3.67696	2.6	5.2	3.67696	3.9	5.2	4.68722	4.31161	5.36004	3.9	1.83848	3.9	2.6	4.11096	5.66657	6.36867
3.67696	5.51543	7.90759	5.81378	4.68722	2.6	2.6	5.36004	4.11096	3.9	2.90689	2.25167	2.90689	3.9	5.2	3.67696	4.68722	4.86415	5.95735	2.90689	5.2	4.11096	2.25167	3.67696	2.6	4.68722	3.67696	3.67696
5.36004	5.81378	8.22192	5.51543	3.67696	2.6	2.90689	5.36004	2.90689	3.67696	3.67696	2.25167	4.86415	3.9	5.51543	2.6	5.36004	4.86415	5.36004	2.6	5.2	3.9	5.36004	2.90689	2.90689	4.31161	4.68722	3.67696
2.90689	5.81378	8.22192	5.36004	4.11096	2.6	3.18434	3.67696	2.90689	6.5	2.90689	3.67696	4.86415	1.83848	5.66657	2.6	3.9	5.2	5.36004	4.68722	5.2	3.9	3.67696	4.86415	4.68722	4.31161	4.86415	7.00071
5.36004	5.95735	7.90759	2.90689	3.67696	2.6	2.6	3.67696	3.67696	3.67696	3.67696	3.18434	4.86415	3.67696	5.2	2.6	3.9	5.66657	6.36867	2.6	4.11096	3.18434	4.31161	5.81378	4.31161	4.11096	5.66657	4.11096
3.18434	5.66657	8.01374	6.09754	4.11096	2.6	2.90689	4.11096	3.67696	3.9	3.18434	4.11096	4.50333	3.67696	5.36004	2.90689	4.68722	4.11096	4.86415	4.68722	5.81378	3.67696	3.18434	6.755	4.11096	4.86415	3.18434	7.00071
5.2	5.51543	7.12039	5.81378	3.67696	2.90689	2.90689	3.67696	3.9	3.9	3.67696	2.25167	2.90689	1.3	5.51543	2.90689	4.68722	4.11096	5.36004	3.67696	5.36004	3.18434	1.3	6.755	4.11096	3.9	5.66657	4.86415
3.67696	5.36004	7.58024	5.36004	4.11096	2.90689	2.6	3.9	3.67696	3.67696	3.67696	2.90689	2.6	1.3	5.95735	2.6	3.67696	4.11096	4.68722	4.68722	5.36004	3.9	1.83848	6.62873	4.31161	4.11096	6.36867	6.62873
5.2	4.86415	7.46793	5.2	3.67696	3.9	2.6	4.68722	3.18434	6.36867	3.18434	4.11096	4.11096	2.90689	6.5	2.6	4.68722	4.31161	5.95735	3.18434	5.66657	2.90689	2.25167	6.62873	4.31161	3.9	3.18434	6.5
4.31161	5.36004	7.00071	2.90689	4.68722	3.9	2.90689	5.36004	2.90689	3.67696	3.67696	4.31161	2.90689	3.67696	6.62873	5.51543	3.9	4.11096	4.68722	4.68722	6.36867	3.18434	5.66657	6.62873	2.25167	3.67696	5.51543	6.5
5.36004	4.86415	7.46793	5.95735	3.9	5.95735	3.67696	3.67696	4.11096	4.31161	3.67696	4.68722	2.6	1.3	6.755	4.11096	4.68722	4.11096	5.81378	4.11096	6.36867	3.18434	3.9	6.62873	2.6	3.67696	5.95735	6.5
4.11096	4.86415	7.58024	5.81378	4.68722	5.36004	3.9	3.9	3.9	4.11096	2.90689	1.83848	3.9	2.90689	6.62873	4.31161	3.9	5.2	4.31161	4.86415	4.31161	3.18434	1.83848	6.62873	2.6	2.90689	6.36867	6.5
5.51543	5.36004	7.6909	3.18434	3.67696	2.6	1.83848	3.67696	4.50333	5.66657	3.67696	1.3	2.90689	3.67696	7.12039	4.31161	4.68722	5.36004	4.86415	4.31161	5.95735	3.67696	6.36867	6.62873	2.6	2.90689	5.95735	6.36867
4.86415	5.36004	7.46793	1.3	3.67696	2.90689	3.9	3.67696	4.68722	3.9	3.18434	3.18434	2.25167	1.83848	6.755	4.11096	3.9	5.66657	6.36867	4.31161	5.81378	3.67696	4.50333	6.755	2.90689	2.90689	7.00071	6.5
5.36004	5.81378	7.8	1.3	4.86415	2.90689	2.25167	3.67696	4.86415	4.68722	3.67696	5.36004	3.9	2.90689	7.00071	3.9	4.68722	5.51543	4.86415	4.11096	5.36004	2.90689	2.6	6.36867	4.86415	2.6	3.67696	6.62873
5.36004	6.36867	7.00071	1.83848	3.67696	2.90689	4.31161	3.9	4.31161	5.2	3.67696	5.36004	2.90689	3.18434	7.6909	4.11096	4.68722	5.66657	4.68722	4.68722	4.86415	3.9	2.6	6.62873	4.86415	2.6	7.00071	6.62873
4.86415	6.5	7.46793	1.83848	4.68722	5.36004	1.83848	5.81378	4.86415	5.95735	2.90689	5.51543	2.25167	2.90689	8.62322	4.31161	3.9	5.36004	6.36867	5.2	4.86415	3.9	7.00071	7.00071	4.86415	5.2	7.00071	6.36867
5.36004	6.5	7.8	1.3	3.9	5.36004	4.86415	5.81378	5.36004	1.3	3.9	1.83848	3.9	1.83848	8.22192	6.5	4.11096	5.81378	4.68722	5.36004	4.68722	3.9	4.68722	7.00071	4.68722	5.36004	4.11096	5.95735
5.36004	5.95735	7.12039	2.6	5.36004	6.36867	1.3	5.36004	5.2	1.3	3.18434	1.83848	2.90689	1.83848	8.81703	1.3	3.67696	5.66657	4.86415	5.2	5.51543	3.18434	2.6	6.5	4.11096	5.81378	6.62873	5.95735
5.81378	6.36867	6.5	2.6	4.31161	4.68722	1.83848	5.2	2.90689	1.83848	4.31161	3.67696	2.6	2.90689	9.1	1.3	4.31161	5.66657	7.00071	5.95735	4.68722	3.9	2.90689	6.5	2.25167	6.09754	4.50333	5.81378
6.36867	6.5	7.8	2.25167	5.36004	6.36867	1.83848	3.18434	2.90689	1.83848	3.67696	6.36867	3.9	3.18434	9.55301	1.3	4.11096	5.36004	5.36004	6.5	4.86415	4.31161	6.36867	5.95735	2.6	1.3	6.62873	6.62873
5.81378	6.5	7.00071	5.66657	3.9	3.9	5.36004	5.95735	2.90689	2.90689	4.68722	6.5	2.90689	1.83848	9.72831	4.31161	4.31161	4.86415	4.68722	5.81378	5.51543	4.31161	6.62873	6.36867	2.25167	1.3	4.50333	6.5
6.36867	6.5	7.12039	5.36004	4.68722	4.11096	1.3	5.81378	2.90689	2.90689	4.31161	6.36867	2.90689	2.90689	9.72831	4.11096	3.9	5.81378	7.00071	6.5	5.36004	5.2	6.36867	6.62873	2.90689	1.3	7.00071	6.62873
5.95735	6.5	7.46793	3.18434	4.50333	3.9	1.83848	5.66657	3.67696	3.9	4.68722	5.51543	2.6	3.18434	10.1533	4.68722	3.9	6.5	4.68722	6.5	5.2	4.11096	4.68722	7.00071	5.36004	1.83848	4.31161	6.09754
5.51543	6.5	6.5	1.83848	5.51543	5.95735	1.3	3.9	3.67696	3.67696	4.11096	5.2	3.9	2.25167	9.98549	4.68722	3.9	4.11096	4.86415	6.5	5.2	3.9	2.6	7.12039	4.31161	1.83848	6.62873	5.36004
5.36004	4.11096	6.755	1.83848	3.18434	3.67696	4.68722	2.25167	3.67696	3.18434	4.68722	5.2	3.9	1.3	9.72831	4.31161	3.9	4.31161	7.00071	6.5	4.86415	3.9	2.6	7.00071	4.68722	2.25167	4.86415	4.68722
5.81378	4.31161	6.755	1.83848	3.67696	6.36867	5.2	4.11096	3.9	4.68722	4.68722	5.36004	2.6	2.90689	9.19239	5.51543	3.9	4.11096	5.95735	5.81378	4.86415	4.11096	6.36867	7.00071	4.86415	2.6	2.25167	6.5
5.36004	6.36867	6.62873	5.95735	3.9	3.67696	4.31161	4.68722	5.2	4.11096	4.86415	4.68722	2.90689	3.18434	9.1	5.36004	3.9	4.86415	5.81378	5.81378	5.36004	3.9	5.36004	6.36867	1.3	3.67696	2.25167	6.5
5.36004	3.67696	6.5	6.36867	4.31161	3.67696	4.11096	4.31161	5.2	4.68722	4.86415	1.83848	2.6	3.18434	7.90759	5.2	3.9	4.68722	4.86415	5.81378	5.81378	3.9	4.86415	6.5	1.83848	4.31161	6.5	7.12039
5.36004	3.9	6.5	3.9	4.86415	6.36867	3.67696	5.95735	5.51543	4.31161	4.68722	3.9	4.50333	1.83848	8.22192	7.00071	3.67696	3.67696	7.46793	5.81378	4.11096	4.68722	2.6	6.36867	2.25167	4.68722	5.66657	4.31161
5.36004	5.81378	7.00071	1.3	3.67696	3.18434	1.3	1.83848	5.95735	4.68722	4.68722	6.36867	2.90689	3.18434	7.46793	2.6	4.31161	6.62873	6.755	5.81378	4.50333	4.68722	2.90689	6.36867	2.90689	5.51543	4.86415	4.68722
5.36004	3.67696	7.35391	1.3	3.9	3.67696	1.83848	4.68722	5.81378	4.50333	4.68722	2.25167	2.90689	3.18434	6.5	5.51543	3.9	5.95735	5.95735	5.81378	5.2	4.68722	2.6	4.31161	4.31161	5.51543	4.68722	6.5
4.68722	3.9	5.81378	1.83848	3.67696	6.5	5.36004	4.86415	5.36004	3.9	4.68722	4.68722	2.6	2.6	6.5	4.31161	3.18434	4.11096	7.46793	5.81378	5.81378	4.68722	6.5	3.67696	4.86415	6.09754	2.25167	3.18434
4.68722	5.95735	6.62873	1.3	4.86415	3.67696	2.90689	6.36867	5.2	5.81378	5.51543	4.68722	4.86415	3.18434	6.5	4.68722	3.9	4.68722	7.46793	5.81378	4.11096	4.68722	4.31161	5.36004	5.2	2.6	5.81378	3.9
5.36004	3.67696	6.62873	1.3	3.18434	2.6	2.90689	1.83848	4.86415	1.3	5.51543	4.31161	2.90689	3.18434	5.36004	4.68722	3.9	5.2	6.755	5.81378	5.36004	5.36004	4.68722	5.95735	5.2	2.90689	4.86415	6.5
5.66657	3.9	6.62873	1.3	4.11096	2.6	3.18434	4.68722	3.9	1.3	5.51543	5.66657	3.67696	2.90689	5.2	4.31161	3.9	4.68722	7.00071	5.81378	5.81378	4.31161	4.31161	6.36867	5.36004	5.95735	2.25167	3.67696
5.66657	3.67696	6.5	1.3	2.90689	6.5	2.90689	5.2	3.18434	1.83848	5.36004	2.6	3.18434	3.18434	5.2	6.36867	4.31161	4.86415	7.12039	5.81378	5.51543	4.68722	5.36004	6.36867	4.86415	6.36867	2.25167	6.36867
5.36004	5.81378	6.36867	6.36867	4.86415	2.6	2.6	4.86415	3.67696	1.3	5.36004	4.68722	4.68722	3.18434	6.36867	7.00071	3.18434	4.31161	7.46793	5.81378	3.18434	3.9	2.6	6.36867	1.83848	6.09754	5.2	3.67696
5.36004	3.9	5.95735	4.50333	3.67696	6.62873	2.90689	4.68722	3.67696	1.3	5.36004	4.68722	2.90689	2.90689	4.68722	7.00071	3.9	4.86415	8.01374	5.95735	3.67696	3.67696	2.90689	6.36867	2.25167	6.09754	4.86415	3.9
6.36867	3.9	5.81378	1.3	3.9	2.6	2.90689	4.68722	3.67696	1.3	5.36004	5.36004	4.31161	2.90689	4.31161	4.11096	3.18434	4.86415	7.6909	6.5	3.9	3.67696	3.18434	6.36867	1.3	6.36867	4.86415	6.62873
6.62873	5.81378	6.5	2.25167	2.6	2.6	2.90689	4.68722	4.50333	1.83848	5.36004	5.2	4.31161	3.18434	5.36004	5.36004	3.67696	4.68722	7.46793	5.2	3.9	3.9	6.36867	5.95735	2.90689	6.36867	2.25167	3.9
6.36867	3.67696	6.62873	2.25167	5.2	6.36867	3.67696	5.36004	5.36004	3.67696	5.51543	5.36004	4.11096	3.18434	4.68722	4.68722	3.67696	4.86415	7.00071	5.36004	5.81378	3.9	5.66657	6.62873	4.86415	6.36867	4.68722	6.62873
7.00071	3.67696	6.5	1.3	3.9	3.18434	4.68722	5.81378	5.81378	2.6	5.51543	2.90689	5.36004	3.67696	5.36004	4.86415	3.9	4.86415	6.5	6.5	5.36004	4.68722	4.11096	7.00071	5.2	6.36867	4.68722	5.95735
7.00071	3.67696	6.5	6.36867	4.11096	2.6	2.6	5.81378	5.81378	2.6	5.36004	4.86415	5.36004	2.90689	4.31161	4.68722	4.11096	5.2	7.00071	6.5	4.31161	4.68722	3.67696	7.58024	5.2	6.36867	5.51543	3.67696
7.58024	3.67696	6.5	6.36867	2.25167	7.00071	2.6	5.95735	3.67696	2.6	5.2	5.51543	5.36004	3.67696	4.86415	7.8	2.90689	5.36004	6.5	6.36867	6.36867	4.31161	2.90689	7.8	4.86415	6.36867	2.25167	6.36867
7.12039	3.67696	6.5	6.36867	4.86415	2.90689	2.90689	6.5	3.67696	2.6	5.51543	4.86415	5.81378	3.18434	4.11096	7.90759	2.90689	5.36004	7.00071	6.5	5.36004	4.68722	3.67696	7.6909	2.25167	6.09754	2.25167	3.67696
7.12039	5.81378	7.00071	4.68722	4.11096	6.62873	2.90689	7.00071	3.18434	2.25167	5.51543	5.2	5.95735	2.90689	5.36004	7.58024	5.36004	5.66657	6.62873	6.755	4.31161	4.68722	6.36867	7.58024	2.25167	6.36867	5.36004	3.9
7.46793	3.18434	6.62873	3.67696	4.11096	2.90689	2.6	7.58024	2.90689	1.83848	5.36004	4.11096	4.68722	2.6	3.67696	7.00071	2.90689	5.36004	6.62873	6.36867	6.36867	4.31161	5.51543	7.58024	2.6	6.5	5.36004	2.90689
8.22192	3.67696	5.95735	3.67696	1.3	6.5	1.3	7.00071	2.90689	5.51543	5.36004	3.67696	6.36867	3.9	4.31161	5.81378	2.6	5.36004	6.5	6.62873	5.36004	4.11096	5.95735	5.2	1.83848	7.00071	5.2	2.6
7.90759	3.67696	5.81378	1.83848	4.86415	2.6	3.9	7.00071	2.90689	1.3	5.36004	5.51543	5.95735	4.11096	3.67696	5.81378	5.66657	5.66657	6.5	6.36867	5.36004	4.31161	3.9	5.2	2.90689	7.00071	6.5	6.62873
8.01374	2.6	5.81378	2.25167	4.11096	2.90689	2.90689	6.62873	2.90689	2.6	5.36004	6.09754	5.66657	4.68722	4.68722	5.36004	2.6	5.36004	6.5	5.95735	5.36004	4.31161	3.9	5.2	2.6	6.09754	2.90689	7.00071
7.6909	2.6	6.5	2.6	1.3	6.36867	2.90689	7.00071	3.18434	2.25167	5.36004	5.51543	5.51543	5.2	3.67696	5.2	2.6	4.86415	6.5	6.36867	4.11096	3.9	3.18434	5.2	2.25167	6.36867	2.25167	7.00071
7.46793	5.81378	6.5	2.6	4.68722	3.67696	2.90689	6.5	3.67696	5.66657	5.36004	4.11096	5.36004	4.68722	4.86415	3.9	6.62873	4.68722	7.00071	5.81378	6.5	3.67696	2.6	5.2	5.2	6.5	7.00071	6.62873
7.58024	2.6	5.81378	5.51543	3.67696	2.90689	2.6	1.83848	3.67696	5.36004	4.86415	4.11096	4.86415	4.68722	3.67696	4.11096	2.6	3.67696	7.00071	5.95735	6.36867	2.90689	2.90689	5.2	5.36004	6.5	6.36867	6.62873
7.12039	2.6	5.51543	5.95735	3.9	2.90689	1.3	7.58024	3.67696	5.2	5.36004	5.36004	4.68722	4.31161	4.50333	4.68722	2.6	3.67696	7.12039	5.95735	5.51543	4.68722	3.18434	5.2	5.51543	6.5	6.5	6.5
7.46793	2.6	5.66657	6.09754	4.11096	2.90689	3.9	6.36867	3.67696	5.81378	4.68722	5.95735	5.2	4.68722	3.67696	4.86415	2.6	7.00071	7.00071	5.66657	4.50333	4.68722	3.18434	4.86415	2.6	6.36867	6.62873	7.00071
7.00071	2.6	5.36004	6.09754	3.9	2.90689	2.6	1.3	3.67696	4.86415	5.95735	4.50333	5.51543	4.50333	4.31161	4.31161	2.6	5.2	7.6909	5.36004	6.5	4.68722	3.9	4.86415	3.18434	6.09754	2.6	6.5
7.12039	2.25167	5.81378	5.81378	3.9	7.00071	2.6	1.3	4.68722	5.36004	5.36004	5.51543	5.81378	4.11096	3.67696	4.11096	2.90689	5.2	8.01374	5.36004	5.2	4.11096	3.9	4.31161	2.6	6.09754	2.6	6.62873
7.12039	5.51543	5.66657	5.51543	3.67696	4.11096	2.6	7.12039	5.2	5.81378	5.81378	4.50333	5.81378	4.11096	4.31161	6.5	3.67696	4.86415	8.81703	4.31161	5.36004	4.68722	5.95735	4.31161	1.83848	6.09754	6.62873	6.62873
6.5	1.83848	5.36004	5.36004	1.83848	4.31161	2.6	7.58024	5.81378	5.95735	5.81378	5.51543	6.5	2.90689	3.18434	7.00071	3.67696	4.31161	8.81703	4.68722	5.36004	4.11096	5.95735	5.51543	2.6	5.95735	7.90759	6.09754
6.36867	1.3	4.68722	4.68722	4.86415	3.9	2.6	7.00071	4.86415	5.36004	6.36867	3.67696	6.5	3.18434	3.9	6.62873	6.755	4.86415	9.1	5.36004	4.86415	2.90689	5.66657	5.81378	4.68722	5.51543	7.90759	6.09754
6.5	1.3	5.2	4.68722	3.67696	4.11096	1.83848	7.00071	5.51543	6.5	6.5	5.51543	6.62873	3.18434	3.67696	6.5	4.31161	4.86415	9.19239	3.67696	4.68722	2.6	5.95735	8.01374	4.31161	5.36004	7.6909	6.09754
6.5	1.3	5.36004	4.86415	3.9	3.67696	1.3	6.5	5.66657	5.95735	6.36867	4.31161	2.90689	2.90689	3.9	6.5	4.68722	4.31161	8.81703	3.67696	5.95735	2.6	3.9	8.22192	4.86415	5.36004	2.90689	6.36867
6.5	5.95735	5.36004	2.90689	1.83848	3.18434	3.67696	6.5	5.81378	6.36867	6.5	5.81378	2.6	3.67696	3.9	6.5	5.36004	3.9	8.42496	4.68722	6.36867	4.31161	3.67696	8.62322	5.2	5.51543	2.6	5.66657
7.12039	1.3	3.9	6.36867	5.36004	2.90689	2.6	5.95735	4.86415	6.755	6.5	3.9	2.6	3.18434	4.86415	3.9	6.36867	4.11096	9.1	2.90689	4.50333	2.90689	3.9	8.72067	4.86415	5.36004	5.36004	6.09754
7.12039	1.3	3.67696	4.86415	3.67696	2.90689	2.6	6.5	4.68722	7.00071	6.5	5.95735	4.68722	2.90689	4.50333	4.68722	6.36867	3.18434	8.62322	3.18434	6.5	2.90689	3.9	8.42496	5.2	5.36004	6.62873	5.95735
7.00071	2.25167	5.36004	5.2	3.67696	2.6	2.6	6.36867	4.11096	6.62873	5.81378	4.11096	4.11096	4.11096	5.36004	4.68722	7.12039	2.90689	8.32406	4.68722	6.5	4.31161	6.62873	8.22192	4.86415	4.86415	9.1	6.09754
7.00071	1.83848	6.5	4.86415	1.3	2.90689	2.6	6.755	6.36867	6.5	5.81378	6.36867	3.9	4.11096	4.31161	4.68722	1.3	7.00071	8.01374	2.6	5.2	2.25167	5.95735	4.11096	4.86415	5.2	8.22192	5.51543
7.35391	5.81378	6.5	4.50333	5.36004	2.90689	2.6	7.00071	6.62873	6.62873	5.81378	4.68722	3.9	4.31161	5.36004	4.68722	1.3	7.46793	7.35391	4.86415	5.36004	2.90689	5.95735	4.31161	4.11096	5.36004	3.67696	6.09754
7.35391	5.81378	4.86415	3.67696	2.90689	2.90689	1.83848	6.5	4.68722	7.46793	5.66657	6.5	3.18434	4.86415	4.31161	4.11096	6.62873	7.58024	7.35391	2.25167	5.2	4.31161	5.95735	4.68722	4.11096	4.86415	2.90689	5.51543
7.35391	2.25167	5.36004	4.68722	3.67696	3.18434	1.3	6.62873	6.36867	7.35391	5.51543	3.9	5.95735	5.2	5.36004	4.31161	7.00071	5.2	7.35391	4.68722	5.2	2.6	5.66657	4.31161	1.83848	4.68722	4.11096	5.66657
7.35391	2.6	3.18434	4.50333	2.90689	2.90689	3.67696	5.81378	6.36867	6.5	5.36004	4.31161	5.95735	5.2	3.9	4.68722	1.3	5.2	7.00071	1.3	5.2	4.11096	3.9	5.2	2.25167	4.86415	4.31161	5.95735
6.62873	5.51543	3.9	5.95735	1.3	2.90689	2.6	6.36867	6.5	7.46793	4.68722	6.5	5.81378	5.2	4.86415	4.31161	6.62873	5.2	6.5	4.31161	6.62873	1.83848	3.9	5.2	4.31161	4.86415	4.11096	6.09754
6.62873	5.36004	3.67696	5.36004	5.51543	2.90689	1.83848	6.62873	6.62873	7.00071	4.68722	3.9	5.36004	5.36004	4.68722	3.9	6.5	5.2	6.36867	1.83848	4.31161	3.9	3.9	5.36004	4.31161	4.86415	4.86415	6.36867
6.5	2.6	2.90689	3.9	2.90689	3.67696	1.3	7.00071	6.5	7.00071	5.66657	5.2	4.86415	5.51543	5.36004	3.9	6.5	4.68722	6.36867	1.3	5.81378	1.3	3.67696	5.51543	4.68722	5.2	9.46414	6.09754
7.00071	2.25167	3.67696	4.11096	3.18434	3.18434	3.67696	7.00071	4.68722	5.95735	5.51543	3.67696	7.00071	6.09754	4.11096	5.36004	6.5	4.31161	5.81378	5.36004	5.95735	3.67696	4.68722	5.36004	4.11096	4.86415	3.67696	6.62873
7.12039	2.90689	3.67696	3.9	1.3	6.5	2.6	6.62873	6.62873	6.36867	5.36004	6.5	6.62873	6.62873	5.81378	6.36867	6.755	2.6	6.09754	1.3	6.5	3.18434	4.68722	4.31161	4.68722	4.86415	3.67696	7.00071
7.00071	5.2	2.90689	3.9	5.66657	3.67696	3.67696	7.00071	6.5	6.5	5.2	3.9	2.90689	6.5	4.31161	6.5	6.36867	5.95735	5.51543	1.3	7.12039	2.90689	5.2	4.11096	1.83848	5.36004	3.18434	7.00071
6.36867	4.86415	3.18434	5.36004	3.18434	4.31161	2.90689	7.12039	3.9	6.5	5.51543	6.62873	2.90689	6.36867	5.95735	6.5	6.5	7.35391	5.95735	5.66657	7.35391	3.9	6.5	4.68722	2.25167	5.36004	3.9	7.46793
6.62873	4.68722	3.67696	4.86415	3.18434	3.9	4.31161	6.62873	4.11096	6.62873	5.66657	3.9	2.90689	5.95735	5.36004	6.5	6.5	7.58024	5.66657	1.83848	3.9	3.67696	5.51543	5.2	4.68722	5.36004	3.67696	7.00071
7.00071	2.6	3.18434	4.68722	1.3	2.90689	3.67696	6.755	4.31161	6.62873	5.81378	4.11096	2.6	5.81378	6.62873	6.5	5.95735	7.58024	5.81378	1.3	5.81378	3.18434	5.95735	4.86415	4.11096	5.36004	3.67696	7.46793
7.00071	2.6	3.67696	3.9	5.51543	2.90689	4.68722	7.12039	4.86415	5.51543	5.51543	3.9	2.6	5.81378	5.36004	6.5	6.62873	5.81378	5.95735	6.36867	6.5	2.90689	6.36867	5.2	4.86415	5.36004	3.67696	6.5
[truncated: 259 more rows]

## Sheet: Y25_72set3_th
diam_95	diam_159	diam_111	diam_127	diam_143	diam_175	diam_31	diam_191	diam_63	diam_223	diam_207	diam_239	diam_255	diam_79	diam_15	diam_47	diam_218	diam_145	diam_72	diam_36	diam_109	diam_254	diam_182
[truncated: 545 more rows]

[truncated: 1 more sheets: ctrl_72set1_th]
