# Supplementary material for: ROCK and the actomyosin network control biomineral growth and morphology during sea urchin skeletogenesis
Source: eLife. 2024 Apr 4;12:RP89080. doi: 10.7554/eLife.89080 (PMC10994658; doi:10.7554/eLife.89080)
Supplement: Figure 4—source data 1. [file elife-89080-fig4-data1.xlsx]

## Sheet: 18.08
Lat-A
	5nM	delayed	branched	extra spicule	grain spicule	normal			blebb		branched	normal
addtion at	22 h	9-sick	13-sick	7	4	0				5uM
	25h	8	22 sick + 7	0	0	0			addtion at	22 h	31-sick	0
										25h	30-sick	1-sick
3 nM	22 h	1	32	7	1	0
	25 h	0	35	0	0	0			3 uM	22 h	37- sick	0
										25 h	30	3-sick
1 nM	22 h	0	7	0	0	23
	25 h	0	17	0	0	13			1 uM	22 h	19	15	mini
										25 h	17	23

## Sheet: 08.09.21
08.09.21
			normal	branched	extra spicule	inhibited
		DMSO at 49h	32	0	0	0
add at 23h*	2.5 nM	Lat-A at 49h	1	27	4	1	* added too late! Already with spiculs
add at 25h	2.5 nM	Lat-A at 49h	8	29	1	0
add at 23h*	2 uM	Blebb at 50h	0	24	0	7	* added too late! Already with spiculs
add at 25h	2 uM	Blebb at 50h	1	25	0	0

## Sheet: 22.09.21
22.09.21
			normal	branched	extra spicule	inhibited	sick	branched + grain spicules+ extra
		DMSO at 47h	45	0	0	0	0	0
add at 20	2.5 nM	Lat-A at 47h	0	!!!!	10*	0	2	24		* extra and branched
add at 25h	2.5 nM	Lat-A at 48h	0	43	1*	0	0	0
add at 21	2 uM	Blebb at 48h	0	42	0	8**	0	0		** normal spiculs but small
add at 25h	2 uM	Blebb at 49h	0	35	1	7**	0	0
add at 25h	2.5 & 2	Lat-A & Bleb at 50h	0	40***	0	0	0	0		*** very sick

## Sheet: 06.10.21
06.10.21
			normal	branched	extra	grains	delayed
		DMSO at 47hpf	35	0	0	0
add at 20h	2.5 nM	Lat-A at 47hpf	0	3	11*	20*	0			*generlly sick
add at 25h	2.5 nM	Lat-A at 50hpf		24* + 2	3*		3*
add at 20h	2 nM	Lat-A at 47hpf	0	13+ 18**	7	5*	0			** extra and branched
add at 25h	2 nM	Lat-A at 50hpf	0	30	0	0	2
add at 20h	2 uM	Blebb at 48hpf	0	26	0	0	6
add at 25h	2 uM	Blebb at 50hpf	0	26	0	0	9
add at 20h	1.5 uM	Blebb at 48hpf	2	18	0	0	14
add at 25h	1.5 uM	Blebb at 51hpf	1	***25	0	0	10			*** mild phenotypes
add at 20h	1 uM, 1.5 nM	Blebb & Lat-A at 48h		15+10**+9"						" branched and grains
add at 25h	1 uM, 1.5 nM	Blebb & Lat-A at 51h	0	34+ 2*	0	0	0
add at 20h	1.5 uM, 2 nM	Blebb & Lat-A at 49h	0	5+8*	6*	13*	0
add at 25h	1.5 uM, 2 nM	Blebb & Lat-A at 51h	0	24+13*	0	0	0

## Sheet: 13.10.21
13.10.21
				normal	branched	extra	grains	delayed
			DMSO at 46hpf	35	0	0	0	0
												*generlly sick
	add at 20h	2.5 nM	Lat-A at 50hpf	4	24	5**	0	3
	add at 26h	2.5 nM	Lat-A at 47hpf	0	32*	0	0	0
												** extra and branched
	add at 20h	2 nM	Lat-A at 50hpf	20?	6	2	0	3
	add at 26h	2 nM	Lat-A at 48hpf	0	31	1**	0	2
	add at 20h	1.5 nM	Lat-A at 47hpf	-----	-----	-----	-----	-----
	add at 26h	1.5 nM	Lat-A at 48hpf	12	17	0	0	4
	add at 20h	2 uM	Blebb at 46hpf	0	32	0	0	6
	add at 26h	2 uM	Blebb at 46hpf	0	30	0	0	6
	add at 20h	1.5 uM	Blebb at 48hpf									*** mild phenotypes
	add at 25h	1.5 uM	Blebb at 51hpf
												" branched and grains
	add at 20h	1 uM, 1.5 nM	Blebb & Lat-A at 47h	0	26***	0	0	4
	add at 26h	1 uM, 1.5 nM	Blebb & Lat-A at 51h	-----	-----	-----	-----	-----
	add at 20h	1 uM, 2 nM	Blebb & Lat-A at 47h	0	31	8**	0	0
	add at 26h	1 uM, 2 nM	Blebb & Lat-A at 51h	0	35	1**	0	1

## Sheet: 20.10.21
13.10.21
				normal	branched	extra	grains	delayed	undeveloped
			DMSO at 49hpf	28	0	0	0	3	0		*generlly sick
	add at 0h	2 nM	Lat-A at 52hpf	2*	18*	3*	0	13*	4
	add at 21h	2 nM	Lat-A at 51hpf	0	25	7	1"	1	0
	add at 26h	2 nM	Lat-A at 49hpf	1	28	9	0	0	0
	add at 0h	2 uM	Blebb at 52hpf	20	13	2	0	11	1
	add at 21h	2 uM	Blebb at 51hpf	1	30	1	0	10	0
	add at 26h	2 uM	Blebb at 49hpf	0	27	0	0	3	0
	add at 0h	1.5 uM, 2 nM	Blebb & Lat-A at 52h	0	4+ 18*	3*	0	3*	4
	add at 21h	1.5 uM, 2 nM	Blebb & Lat-A at 51h	0	24	2	7	1	0
	add at 26h	1.5 uM, 2 nM	Blebb & Lat-A at 50h	0	38	6	0	0	0

## Sheet: summary
	before alteration					normal	branched	extra	grains	delayed	undeveloped						after alteration					normal	branched	extra	delayed
																					DMSO	28	0	0	3		average		normal	branched	extra	delayed
																											Control		35.75	0	0	0.75
																											Blebb	Add at 20hpf	0.25	32.5	0.25	7.5
	2021-10-20		add at 21h	2 uM	Blebb at 51hpf	1	30	1	0	10	0		" branched and grains				2021-10-20		add at 21h	2 uM	Blebb at 51hpf	1	30	1	10			Add at 25hpf	0	29.5	0.25	6.25
			add at 26h	2 uM	Blebb at 49hpf	0	27	0	0	3	0								add at 26h	2 uM	Blebb at 49hpf	0	27	0	3
																											Lat-A	Add at 20hpf	6.66667	21	5.33333	3
			add at 21h	2 nM	Lat-A at 51hpf	0	25	7	1"	1	0								add at 21h	2 nM	Lat-A at 51hpf	0	26	7	1			Add at 25hpf	0.333333	29.6667	3.33333	1.33333
			add at 26h	2 nM	Lat-A at 49hpf	1	28	9	0	0	0								add at 26h	2 nM	Lat-A at 49hpf	1	28	9	0
																											Blebb & Lat-A	Add at 20hpf	0	21.5	1	10.5
			add at 21h	1.5 uM, 2 nM	Blebb & Lat-A at 51h	0	24	2	7	1	0								add at 21h	1.5 uM, 2 nM	Blebb & Lat-A at 51h	0	24	2	8			Add at 25hpf	0	37.5	3	0
			add at 26h	1.5 uM, 2 nM	Blebb & Lat-A at 50h	0	38	6	0	0	0								add at 26h	1.5 uM, 2 nM	Blebb & Lat-A at 50h	0	38	6	0
																											STDVE		normal	branched	extra	delayed
	2021-10-13					normal	branched	extra	grains	delayed							2021-10-13					normal	branched	extra	delayed		Control		6.99405	0	0	1.5
																					DMSO	35	0	0	0		Blebb	Add at 20hpf	0.5	6.80686	0.5	1.91485
																												Add at 25hpf	0	4.04145	0.5	2.5
			add at 20h	2 uM	Blebb at 46hpf	0	32	0	0	6									add at 20h	2 uM	Blebb at 46hpf	0	32	0	6
			add at 26h	2 uM	Blebb at 46hpf	0	30	0	0	6									add at 26h	2 uM	Blebb at 46hpf	0	30	0	6		Lat-A	Add at 20hpf	11.547	13.2288	2.88675	2
													** extra and branched															Add at 25hpf	0.57735	1.52753	4.93288	1.1547
			add at 20h	2 nM	Lat-A at 50hpf	20?	6	2	0	3									add at 20h	2 nM	Lat-A at 50hpf	20	6	2	3
			add at 26h	2 nM	Lat-A at 48hpf	0	31	1**	0	2									add at 26h	2 nM	Lat-A at 48hpf	0	31	1	2		Blebb & Lat-A	Add at 20hpf	0	3.53553	1.41421	3.53553
																												Add at 25hpf	0	0.707107	4.24264	0
	2021-10-06					normal	branched	extra	grains	delayed							2021-10-06					normal	branched	extra	delayed		STDV/2		normal	branched	extra	delayed
																					DMSO	35	0	0	0		Control		3.49702	0	0	0.75
																													0	0	0	0
			add at 20h	2 uM	Blebb at 48hpf	0	26	0	0	6									add at 20h	2 uM	Blebb at 48hpf	0	26	0	6		Blebb	add at 20	0.25	3.40343	0.25	0.957427
			add at 25h	2 uM	Blebb at 50hpf	0	26	0	0	9									add at 25h	2 uM	Blebb at 50hpf	0	26	0	9			add at 25	0	2.02073	0.25	1.25
			add at 20h	2 nM	Lat-A at 48hpf	0	13+ 18**	7	5*	0			*generlly sick						add at 20h	2 nM	Lat-A at 48hpf	0	31	7	5	5 *	Lat-A	add at 20	5.7735	6.61438	1.44338	1
			add at 25h	2 nM	Lat-A at 50hpf	0	30	0	0	2			" branched and grains						add at 25h	2 nM	Lat-A at 50hpf	0	30	0	2			add at 25	0.288675	0.763763	2.46644	0.57735
													*** mild phenotypes
			add at 20h	1.5 uM, 2 nM	Blebb & Lat-A at 49h	0	5+8*	6*	13*	0			** extra and branched						add at 20h	1.5 uM, 2 nM	Blebb & Lat-A at 49h	0	19	0	13	13*	Blebb & Lat-A	add at 20	0	1.76777	0.707107	1.76777
			add at 25h	1.5 uM, 2 nM	Blebb & Lat-A at 51h	0	24+13*	0	0	0									add at 25h	1.5 uM, 2 nM	Blebb & Lat-A at 51h	0	37	0	0			add at 25	0	0.353553	2.12132	0
						normal	branched	extra spicule	delayed	sick												normal	branched	extra	delayed
																	2021-09-22				DMSO	45	0	0	0		sum
	2021-09-22													* extra and branched													Blebb	Add 20hpf	162
			add at 21	2 uM	Blebb at 48h	0	42	0	8**	0				*** very sick					add at 21	2 uM	Blebb at 48h	0	42	0	8			Add 25hpf	144
			add at 25h	2 uM	Blebb at 49h	0	35	1	7**	0									add at 25h	2 uM	Blebb at 49h	0	35	1	7
														** normal spiculs but small													Lat-A	Add 20hpf	108
																												Add 25hpf	104
																			the grains and branched I added to branched categorey
																			the grains only I added to delayed catagorey								Blebb & Lat-A	Add 20hpf	66
																												Add 25hpf	81
																		branched	branched and delayed
	the one with grains only is in blocked, normal skeleton but delayed : is delayed
																	alteration 2+3					normal	branched	branched and delayed	extra	blocked	delayed	Total		% percentage in total					normal	branched	branched and delayed	extra	blocked	delayed	Total
	alteration 2					normal	branched	extra	blocked	delayed																																		3* biological for lat-A
																					DMSO	28	0	0	0	0	3	31						DMSO	90.3226	0	0	0	0	9.67742	100			average		normal	branched	branched and delayed	extra
					DMSO	28	0	0	0	3																																		Control		97.5806	0	0	0
																	2021-10-20		add at 21h	2 uM	Blebb at 51hpf	1	30	0	1	0	10	42		2021-10-20		add at 21h	2 uM	Blebb at 51hpf	2.38095	71.4286	0	2.38095	0	23.8095	100			Blebb	Add at 20hpf	0.595238	80.2223	0	0.595238
	2021-10-20		add at 21h	2 uM	Blebb at 51hpf	1	30	1	0	10									add at 26h	2 uM	Blebb at 49hpf	0	24	3	0	0	3	30				add at 26h	2 uM	Blebb at 49hpf	0	80	10	0	0	10	100				Add at 25hpf	0	78.5908	3.66279	0.581395
			add at 26h	2 uM	Blebb at 49hpf	0	27	0	0	3
																			add at 21h	2 nM	Lat-A at 51hpf	0	1	25	7	1	0	34				add at 21h	2 nM	Lat-A at 51hpf	0	2.94118	73.5294	20.5882	2.94118	0	100			Lat-A	Add at 20hpf	21.5054	7.43201	45.44	17.5404
			add at 21h	2 nM	Lat-A at 51hpf	0	26	7	1	0									add at 26h	2 nM	Lat-A at 49hpf	1	1	27	9	0	0	38				add at 26h	2 nM	Lat-A at 49hpf	2.63158	2.63158	71.0526	23.6842	0	0	100				Add at 25hpf	0.877193	11.6615	74.5421	8.87513
			add at 26h	2 nM	Lat-A at 49hpf	1	28	9	0	0
																			add at 21h	1.5 uM, 2 nM	Blebb & Lat-A at 51h	0	0	24	2	8	0	34				add at 21h	1.5 uM, 2 nM	Blebb & Lat-A at 51h	0	0	70.5882	5.88235	23.5294	0	100			Blebb & Lat-A	Add at 20hpf	0	0	55.6066	12.3162
			add at 21h	1.5 uM, 2 nM	Blebb & Lat-A at 51h	0	24	2	8	0									add at 26h	1.5 uM, 2 nM	Blebb & Lat-A at 50h	0	8	30	6	0	0	44				add at 26h	1.5 uM, 2 nM	Blebb & Lat-A at 50h	0	18.1818	68.1818	13.6364	0	0	100				Add at 25hpf	0	9.09091	82.7396	8.16953
			add at 26h	1.5 uM, 2 nM	Blebb & Lat-A at 50h	0	38	6	0	0
																	2021-10-13					normal	branched	branched and delayed	extra	blocked	delayed			2021-10-13					normal	branched	branched and delayed	extra	blocked	delayed
	2021-10-13					normal	branched	extra	blocked	delayed																																		STDVE		normal	branched	branched and delayed	extra
																					DMSO	35	0	0	0	0	0	35						DMSO	100	0	0	0	0	0	100			Control		4.83871	0	0	0
					DMSO	35	0	0	0	0
																			add at 20h	2 uM	Blebb at 46hpf	0	32	0	0	0	6	38				add at 20h	2 uM	Blebb at 46hpf	0	84.2105	0	0	0	15.7895	100			Blebb	Add at 20hpf	1.19048	6.01561	0	1.19048
			add at 20h	2 uM	Blebb at 46hpf	0	32	0	0	6									add at 26h	2 uM	Blebb at 46hpf	0	30	0	0	0	6	36				add at 26h	2 uM	Blebb at 46hpf	0	83.3333	0	0	0	16.6667	100				Add at 25hpf	0	3.93367	4.75987	1.16279
			add at 26h	2 uM	Blebb at 46hpf	0	30	0	0	6
																			add at 20h	2 nM	Lat-A at 50hpf	20	6	0	2	0	3	31			NOT INCLUDED	add at 20h	2 nM	Lat-A at 50hpf	64.5161	19.3548	0	6.45161	0	9.67742	100			Lat-A	Add at 20hpf	37.2484	10.4297	39.7168	9.9224
			add at 20h	2 nM	Lat-A at 50hpf	20	6	2	0	3									add at 26h	2 nM	Lat-A at 48hpf	0	11	20	1	0	2	34				add at 26h	2 nM	Lat-A at 48hpf	0	32.3529	58.8235	2.94118	0	5.88235	100				Add at 25hpf	1.51934	17.9676	17.7228	12.9091
			add at 26h	2 nM	Lat-A at 48hpf	0	31	1	0	2
																																												Blebb & Lat-A	Add at 20hpf	0	0	21.1872	9.0988
																																													Add at 25hpf	0	12.8565	20.5878	7.73127
																	2021-10-06					normal	branched	branched and delayed	extra	blocked	delayed			2021-10-06					normal	branched	branched and delayed	extra	blocked	delayed
	2021-10-06					normal	branched	extra	blocked	delayed																																		STDV/2		normal	branched	branched and delayed	extra
																					DMSO	35	0	0	0	0	0	35						DMSO	100	0	0	0	0	0	100			Control		2.41935	0	0	0
					DMSO	35	0	0	0	0																																				0	0	0	0
																			add at 20h	2 uM	Blebb at 48hpf	0	26	0	0	0	6	32				add at 20h	2 uM	Blebb at 48hpf	0	81.25	0	0	0	18.75	100			Blebb	add at 20	0.595238	3.00781	0	0.595238
			add at 20h	2 uM	Blebb at 48hpf	0	26	0	0	6									add at 25h	2 uM	Blebb at 50hpf	0	26	0	0	0	9	35				add at 25h	2 uM	Blebb at 50hpf	0	74.2857	0	0	0	25.7143	100				add at 25	0	1.96683	2.37994	0.581395
			add at 25h	2 uM	Blebb at 50hpf	0	26	0	0	9																																							0
																			add at 20h	2 nM	Lat-A at 48hpf	0	0	27	11	4	1	43				add at 20h	2 nM	Lat-A at 48hpf	0	0	62.7907	25.5814	9.30233	2.32558	100			Lat-A	add at 20	18.6242	5.21484	19.8584	4.9612
			add at 20h	2 nM	Lat-A at 48hpf	0	27	11	4	1									add at 25h	2 nM	Lat-A at 50hpf	0	0	30	0	0	2	32				add at 25h	2 nM	Lat-A at 50hpf	0	0	93.75	0	0	6.25	100				add at 25	0.759671	8.98378	8.86139	6.45454
			add at 25h	2 nM	Lat-A at 50hpf	0	30	0	0	2																																							0
																			add at 20h	1.5 uM, 2 nM	Blebb & Lat-A at 49h	0	0	13	6	13	0	32				add at 20h	1.5 uM, 2 nM	Blebb & Lat-A at 49h	0	0	40.625	18.75	40.625	0	100			Blebb & Lat-A	add at 20	0	0	10.5936	4.5494
			add at 20h	1.5 uM, 2 nM	Blebb & Lat-A at 49h	0	13	6	13	0									add at 25h	1.5 uM, 2 nM	Blebb & Lat-A at 51h	0	0	36	1	0	0	37				add at 25h	1.5 uM, 2 nM	Blebb & Lat-A at 51h	0	0	97.2973	2.7027	0	0	100				add at 25	0	6.42824	10.2939	3.86563
			add at 25h	1.5 uM, 2 nM	Blebb & Lat-A at 51h	0	36	1	0	0
																						normal	branched	branched and delayed	extra	blocked	delayed								normal	branched	branched and delayed	extra	blocked	delayed
						normal	branched	extra	blocked	delayed
																					DMSO	45	0	0	0	0	0	45						DMSO	100	0	0	0	0	0	100
					DMSO	45	0	0	0	0							2021-09-22													2021-09-22
	2021-09-22																		add at 21	2 uM	Blebb at 48h	0	42	0	0	0	8	50				add at 21	2 uM	Blebb at 48h	0	84	0	0	0	16	100
			add at 21	2 uM	Blebb at 48h	0	42	0	0	8									add at 25h	2 uM	Blebb at 49h	0	33	2	1	0	7	43				add at 25h	2 uM	Blebb at 49h	0	76.7442	4.65116	2.32558	0	16.2791	100
			add at 25h	2 uM	Blebb at 49h	0	35	1	0	7
																	09/02(Tsvia)				DMSO	30	0	0	0	0	0	30		09/02(Tsvia)				DMSO	100	0	0	0	0	0	100
																			add at 20h	2 nM	Lat-A at 48hpf	0	3	25	1	11	4	44				add at 20h	2 nM	Lat-A at 48hpf	0	6.52174	54.3478	2.17391	23.913	8.69565	95.6522
																			add at 25h	2 nM	Lat-A at 48hpf	1	6	12	1	5	11	36				add at 25h	2 nM	Lat-A at 48hpf	2.77778	16.6667	33.3333	2.77778	13.8889	30.5556	100
																			add at 20h	1.5 uM, 2 nM	Blebb & Lat-A at 49h	0	0	22	0	7	1	30				add at 20h	1.5 uM, 2 nM	Blebb & Lat-A at 49h	0	0	73.3333	0	23.3333	3.33333	100
																			add at 25h	1.5 uM, 2 nM	Blebb & Lat-A at 51h	0	2	22	2	3	4	33				add at 25h	1.5 uM, 2 nM	Blebb & Lat-A at 51h	0	6.06061	66.6667	6.06061	9.09091	12.1212	100
[truncated: 27 more columns]
