# Supplementary material for: ROCK and the actomyosin network control biomineral growth and morphology during sea urchin skeletogenesis
Source: eLife. 2024 Apr 4;12:RP89080. doi: 10.7554/eLife.89080 (PMC10994658; doi:10.7554/eLife.89080)
Supplement: Figure 4—source data 2. [file elife-89080-fig4-data2.xlsx]

## Sheet: Spicule length Fig 4K
	Control	Lat	Bleb
	92.1556	43.7406	44.28
	86.0972	21.0757	87.592
	17.8527	63.3457	25.037
	55.2937	74.5695	98.6534
	37.4978	68.4452	200.738
	81.1231	70.8916	25.5095
	120.668	57.7396	22.5835
	43.6238	53.6905	63.1845
	116.857	70.4893	78.0786
	61.6532	41.5552	115.067
	88.4812	89.9352	134.257
	190.006	69.8554	89.2722
	82.9997	78.9315	112.741
	75.6973	18.7536	61.3492
	62.464	106.473	42.3512
	46.7847	86.3249	77.7524
	213.085	55.7999	40.7817
	81.3138	51.4077	59.9002
	90.6584	35.1292	92.4539
	128.304	32.9887	121.15
	98.8084	107.13	89.676
	63.923	168.108	211.864
	53.1329	149.045	166.473
	120.052	41.4105	144.853
	142.076	68.6065	142.466
	122.093	87.6387	57.939
	87.4663	48.7487	108.96
	114.263	27.3393	81.6068
	87.6413	31.3541	140.415
	53.9875	81.1209	22.9599
	108.135	28.423	41.3174
	59.9799	117.741	36.6031
	37.7313	99.8102	80.1073
	35.6531	149.637	52.4218
	73.3901	105.508	66.6569
	68.9861	46.1622	81.9226
	130.502	99.9417	81.9922
	112.562	50.836	35.3549
	123.824	61.3669	34.5174
	144.939	47.4916	59.9759
	142.032	30.866	255.884
	196.269	37.598	35.4128
	86.1231	25.297	82.9697
	75.8151	52.089	27.6308
	86.4018	51.712	132.908
	118.021	74.127	72.29
	84.8568	15.594	83.048
	64.0491	29.089	54.189
	139.986	24.006	73.085
	101.332	67.815	76.171
	55.9319	44.225	53.451
	37.9729	85.558	38.675
	86.19	15.183	136.356
	80.676	96.423	77.882
	94.606	48.017	70.573
	82.256	38.66	73.18
	71.388	76.772	50.947
	34.675	67.086	30.285
	115.891	25.705	108.03
	79.561	86.638	114.304
	64.237	41.952	117.846
	110.98	46.253	22.14
	54.409	46.42	34.749
	147.388	28.585	100.143
	79.657	28.432	23.336
	79.518	51.39	8.629
	91.715	31.816	28.092
	33.825	104.898	72.048
	47.575	34.602	97.556
	106.486	35.301	72.789
	90.634	19.882	76.567
	138.733	68.612	125.823
	97.854	32.591	42.509
	58.932	30.26	31.949
	78.899	47.005	130.071
	120.177	107.38	106.677
	61.302	38.254	120.03
	6.058	39.056	70.882
	81.074	40.416	82.693
	106.029	8.296	39.689
	59.618	53.675	106.484
	112.174	28.447	45.419
	50.316	42.909	35.066
	122.492	30.412	58.891
	93.538	23.527	58.161
	101.955	35.313	62.869
	93.071	49.562	91.106
	55.945	46.874	61.104
	64.303	28.678	90.716
	113.49	47.32	33.091
	87.203	43.407	81.666
	102.78	17.53	11.585
	104.918	36.942	35.302
	129.531	39.445	101.805
	120.187	30.642	35.63
	80.127	97.862	88.177
	84.075	69.334	61.619
	102	44.999	107.644
	70.897	49.615	61.189
	73.716	26.74	19.678
	113.082	45.136	60.868
	46.605	13.822	54.709
	131.214	5.475	54.954
	105.722	46.081	39.394
	108.896	41.684	66.361
	109.644	37.816	70.385
	118.014	58.77	96.771
	61.496	31.681
	56.582	5.148
	114.808	46.197
	110.708	40.397
	53.922	48.573
	110.654	68.534
	117.892	26.472
	138.642	68.462
	104.329	49.046
		34.727
		42.936
		19.593
		27.213
		30.278
		41.462
		60.387
		33.264
		39.23
		35.264
		33.725
		32.478
		56.27
		53.44
		96.06
		73.482
		21.656
		29.712
		26.148
		51.571
		32.075
		41.777
		62.888
		93.058
		18.71
		35.816
		13.384
		42.347
		20.848
		57.553
		10.923
		18.313
		34.008
