# Supplementary material for: ROCK and the actomyosin network control biomineral growth and morphology during sea urchin skeletogenesis
Source: eLife. 2024 Apr 4;12:RP89080. doi: 10.7554/eLife.89080 (PMC10994658; doi:10.7554/eLife.89080)
Supplement: Figure 6—source data 1. [file elife-89080-fig6-data1.xlsx]

## Sheet: t-test area
signal/area					location
red		green		blue				ROCK		DMSO			ROCK	DMSO			DMSO			ROCK				DMSO		ROCK
tip	back	tip	back	tip	back			tip	back	tip	back		TIP/BACK	tip/back			tip	back		tip	back			tip/back		TIP/BACK
0.0512569	0.00245098	0.0644793	0.019325	0.142018	0.0131976			0.0644793	0.019325	0.023155	0.0127313		3.33657	1.81876			0.023155	0.0127313		0.0644793	0.019325			1.81876		3.33657
0.0928726	0.0501319	0.12311	0.0897098	0.262419	0.058927			0.12311	0.0897098	0.20186	0.0822669		1.37232	2.45373			0.20186	0.0822669		0.12311	0.0897098			2.45373		1.37232
0.140748	0.0325048	0.412402	0.16826	0.126969	0.1058			0.412402	0.16826	0.127698	0.0832681		2.45098	1.53358			0.127698	0.0832681		0.412402	0.16826			1.53358		2.45098
0.0266188	0.0183572	0.100037	0.179645	0.265445	0.234033			0.100037	0.179645	0.0100916	0.0192901		0.556861	0.52315			0.0100916	0.0192901		0.100037	0.179645			0.52315		0.556861
0.000185736	0.00740999	0.023155	0.0127313	0.00594354	0.0365029			0.363743	0.444233	0.258065	0.0548571		0.818812	4.7043			0.258065	0.0548571		0.363743	0.444233			4.7043		0.818812
0.0218605	0.0493601	0.20186	0.0822669	0.217209	0.061426			0.0275938	0.0982976	0.111472	0.0219815		0.280717	5.07119			0.111472	0.0219815		0.0275938	0.0982976			5.07119		0.280717
0.124411	0.034873	0.127698	0.0832681	0.00664792	0.182905			0.0191976	0.00210077	0.329188	0.263843		9.13839	1.24767			0.329188	0.263843		0.0191976	0.00210077			1.24767		9.13839
0.0470865	0.0361217	0.363743	0.444233	0.0517952	0.0361217			0.126532	0.0495529	0.0383887	0.0462752		2.55348	0.829574			0.0383887	0.0462752		0.126532	0.0495529			0.829574		2.55348
0.0141035	0.000192363	0.0275938	0.0982976	0.702968	0.20102			0.149463	0.0271158	0.0607011	0.00788526		5.51202	7.69804			0.0607011	0.00788526		0.149463	0.0271158			7.69804		5.51202
0.00320365	0.0058546	0.0191976	0.00210077	0.0305803	0.00268623			0.238232	0.121229	0.0841405	0.0072392		1.96514	11.6229			0.0841405	0.0072392		0.238232	0.121229			11.6229		1.96514
0.0122589	0.0079385	0.126532	0.0495529	0.177862	0.0731177			0.346047	0.076846	0.0311008	0.0223188		4.50313	1.39348			0.0311008	0.0223188		0.346047	0.076846			1.39348		4.50313
0.00366209	0.00393712	0.149463	0.0271158	0.0422382	0.0465054			0.0590402	0.0505725	0.0924534	0.0147151		1.16744	6.28288			0.0924534	0.0147151		0.0590402	0.0505725			6.28288		1.16744
0.000796707	0.000771605	0.0100916	0.0192901	0.130793	0.0390432			0.092562	0.110915	0.0166059	0.0353307		0.834527	0.470012			0.0166059	0.0353307		0.092562	0.110915			0.470012		0.834527
0.00248139	0	0.258065	0.0548571	0.203474	0.048			0.109412	0.0417362	0.0699354	0.0768455		2.62151	0.910078			0.0699354	0.0768455		0.109412	0.0417362			0.910078		2.62151
0.0215494	0.0513956	0.111472	0.0219815	0.0221338	0.0437653			0.205394	0.0138927	0.08477	0.0532003		14.7843	1.59341			0.08477	0.0532003		0.205394	0.0138927			1.59341		14.7843
0.0116178	0.0209945	0.329188	0.263843	0.363734	0.205157			0.252726	0.0524396	0.18682	0.0346975		4.81937	5.38425			0.18682	0.0346975		0.252726	0.0524396			5.38425		4.81937
0.00480466	0.00247813	0.0383887	0.0462752	0.135938	0.0287766			0.145436	0.0666503	0.0564648	0.0447641		2.18208	1.26138			0.0564648	0.0447641		0.145436	0.0666503			1.26138		2.18208
0.00577087	0.000815716	0.0607011	0.00788526	0.050513	0.0262389					0.0750574	0.0314017			2.39023			0.0750574	0.0314017						2.39023
7.39372e-05	0.000609617	0.0841405	0.0072392	0.000147874	0.00601996					0.154407	0.0305604			5.05251			0.154407	0.0305604						5.05251
0.00716042	0.00409836	0.0311008	0.0223188	0.135289	0.0253308								3.46457	3.27585			0.105914	0.0496564		0.166789	0.0948542		ave	3.27585		3.46457
0.0433622	0.0133766	0.238232	0.121229	0.0917377	0.231488			0.166789	0.0948542	0.105914	0.0496564		2.45098	1.81876			0.105914	0.0496564		0.166789	0.0948542		median	1.81876		2.45098
0.000363954	0.0126322	0.346047	0.076846	0.248289	0.0222568			0.0594253	0.051666	0.043078	0.0285224		0.00284466	0.000427576			0.043078	0.0285224		0.0594253	0.051666		ztest	0.000427576		0.00284466
0.000379157	0.0012478	0.0590402	0.0505725	0.125501	0.0551967
0	0	0.092562	0.110915	0.578512	0.068662
0	0	0.109412	0.0417362	0.282353	0.106845
0.011335	0.00281162	0.205394	0.0138927	0.0285856	0.000992337
0.0702273	0.00692874	0.252726	0.0524396	0.123452	0.00722048
0.0245325	0.0160908	0.145436	0.0666503	0.375116	0.0713877
0.00322171	0.0275454	0.0924534	0.0147151	0.371668	0.227274
0.00251604	0.0682118	0.0166059	0.0353307	0.114102	0.00216695
0.00611829	0.0391287	0.0699354	0.0768455	0.0946635	0.012505
0.00142871	0	0.08477	0.0532003	0.100581	0.228833
0.0326368	0.0052572	0.18682	0.0346975	0.216874	0.0629246
0.00396741	0.0180291	0.0564648	0.0447641	0.017074	0.00487775
0.0211406	0.00895024	0.0750574	0.0314017	0.0240905	0.168083
0.0213254	0.010987	0.154407	0.0305604	0.387097	0.0397009

## Sheet: t-test
6a9		is there difference in 6a9 between the tips and back?						yes :(
tips	back		ROCK	DMSO			ROCK			DMSO
0.142018	0.0131976		0.310064	11.1701			tip	back		tip	back
0.262419	0.058927		0.308158	0.693904			0.454023	1.46429		3.89583	0.348774
0.126969	0.1058		2.04234	42.1937			0.469136	1.52239		0.929336	1.33929
0.265445	0.234033		0.490964	0.156166			3.24806	1.59036		19.2088	0.455253
0.00594354	0.0365029		0.571035	1.10976			0.376866	0.767603		0.0771574	0.494071
0.217209	0.061426		0.0802734	10.0273			7.02273	12.2982		1.26829	1.14286
0.00664792	0.182905		0.802732	0.70372			0.0392533	0.488995		5.0363	0.502258
0.0517952	0.0361217		1.04971	0.175612			0.627778	0.782051		0.905023	1.28606
0.702968	0.20102		6.06889	3.99874			0.711407	0.677714		0.282399	1.60808
0.0305803	0.00268623		4.95876	473.168			3.53857	0.583068		1.20169	0.300518
0.177862	0.0731177		0.403662	0.260909			2.59688	0.523694		569	1.20253
0.0422382	0.0465054		0.513451	3.84197			1.39373	3.4527		0.229885	0.881092
0.130793	0.0390432		0.0990476	0.00892613			0.470436	0.916223		0.248752	0.0647461
0.203474	0.048		0.992	0.120221			0.16	1.61538		0.145535	16.3043
0.0221338	0.0437653		0.513231	3.62518			0.3875	0.390625		0.738779	6.14516
0.363734	0.205157		0.281875	1.56221			7.18524	14		0.842803	0.232486
0.135938	0.0287766		0.415268	0.360355			2.04716	7.26263		0.861422	0.551414
0.050513	0.0262389			16.677			0.38771	0.933638		3.30705	9.17722
0.000147874	0.00601996			0.518188						3.11565	0.186823
0.135289	0.0253308									0.398884	0.769767
0.0917377	0.231488
0.248289	0.0222568		1.17067	30.0196
0.125501	0.0551967
0.578512	0.068662
0.282353	0.106845
0.0285856	0.000992337
0.123452	0.00722048
0.375116	0.0713877
0.371668	0.227274
0.114102	0.00216695
0.0946635	0.012505
0.100581	0.228833
0.216874	0.0629246
0.017074	0.00487775
0.0240905	0.168083
0.387097	0.0397009
