# Supplementary material for: ROCK and the actomyosin network control biomineral growth and morphology during sea urchin skeletogenesis
Source: eLife. 2024 Apr 4;12:RP89080. doi: 10.7554/eLife.89080 (PMC10994658; doi:10.7554/eLife.89080)
Supplement: Figure 7—source data 1. [file elife-89080-fig7-data1.xlsx]

## Sheet: qPCR cycle
		GFP	ubi	Rac1	RhoA	CDC42	Rock1	Vegf	VegfR	RhoGap24l/2	CaraL7	Slc26a5	SM30	angio1	MyoD1	Notchl1	Pitx1		A	Rac1	RhoA	CDC42	Rock1	Vegf	VegfR	RhoGap24l/2	CaraL7	Slc26a5	SM30	angio1	MyoD1	Notchl1	Pitx1
1 27h 0 A		17.2883	20.7178	25.655	29.1292	28.4507	28.2795	29.7097	28.6146	29.4824	31.7396	30.1537	27.7076	28.5716	29.8919	32.2913	29.9975		27h cont	5466.42	587.833	908.589	1014.12	404.961	817.897	468.57	110.051	304.548	1463.95	840.759	360.267	77.2299	336.678
2 27h 80 A		17.1753	19.8949	25.3381	28.4077	27.3789	28.0099	28.848	28.3623	30.4539	33.5589	30.4654	28.9792	28.9583	31.1602	36.2056	33.0144		27h Y	3950.32	550.776	1066	710.986	415.182	567.072	148.115	20.1867	147.027	381.652	386.812	94.1229	3.69223	28.6323
3 48h 0 a		17.4062	19.9849	24.9909	27.7621	26.0648	27.5462	29.5217	29.2562	29.7851	29.3301	29.0581	26.1964	28.9328	31.6251	29.7628	33.3096		48h cont	5229.9	883.119	2625.07	1014.37	285.441	338.48	241.054	322.803	384.383	2412.48	416.577	73.9946	244.526	25.0977
4 48h 80 a		17.2914	15.8908	20.2658	23.1737	20.3876	23.4209	24.089	24.1605	25.8112	25.3715	22.6606	22.0653	23.222	26.8834	27.9006	27.3426		48h y	7841.27	1212.88	7251.81	1034.89	673.995	643.784	223.15	295.921	1685.97	2470.51	1175.86	112.13	58.3662	83.5068
5 48h 80to0a		17.2612	17.1877	21.5804	24.6062	22.3819	24.8071	25.4829	26.1892	26.5637	24.4884	24.1927	20.8414	24.9896	27.1953	26.1151	29.0033		48h Y wash	7752.79	1111.74	4635.03	977.297	633.313	402.483	316.49	1199.11	1449.68	12458.8	869.231	211.009	422.096	66.1166
6 48h 0to80a		17.157	30.3022			35.2216		38.2043	37.1053	35.5957			36.4604	38.1079	34.5208		37.7043		48h Y add	3.63741e+13	3.63741e+13	5528.92	3.63741e+13	815.066	1650.23	4348.69	3.63741e+13	3.63741e+13	2496.5	867.141	8669.51	3.63741e+13	1123.55
																			B	Rac1	RhoA	CDC42	Rock1	Vegf	VegfR	RhoGap24l/2	CaraL7	Slc26a5	SM30	angio1	MyoD1	Notchl1	Pitx1
7 24h 0 B		17.2831	16.9697	21.7901	25.0764	21.9669	24.5837	25.0453	25.1203	26.3834	25.3769	24.6423	21.6388	23.7626	25.7117	28.0908	25.2728		27h cont	5891.5	714.766	5259.73	980.65	729.172	694.914	308.916	589.398	944.426	6492.43	1661.09	475.42	103.25	630.121
8 80 24h B		17.2218	17.1379	21.8784	25.088	22.1444	24.4156	24.8943	24.7083	27.9937	28.8291	26.2405	23.185	24.2139	28.9664	31.3292	28.3195		27h Y	6201.57	790.357	5228.38	1216.92	894.984	1008.47	122.416	71.6091	377.196	2680.93	1385.04	65.5687	14.39	99.3207
9 48h 0 B		17.2369	19.1942	23.3138	26.8249	24.1303	26.1993	27.6086	28.4048	28.8899	25.9133	26.6821	22.5807	26.3904	29.2958	27.9434	30.9525		48h cont	9238.25	970.185	5470.05	1449.57	586.679	351.918	257.761	1741.68	1063.3	14789.2	1282.22	198.64	473.208	68.5918
10 48h 80 B		17.2458	19.5327	23.9749	27.1151	25.4026	26.766	28.3154	28.0424	30.2478	30.6404	28.3407	27.3691	28.283	31.6038	33.6702	33.2163		48h y	7510.51	1000.74	3003.94	1252.08	463.18	551.859	133.995	104.144	455.704	850.225	472.906	56.1149	14.8961	19.9347
11 48h 0to80 B		17.348	20.1261	24.1299	27.3439	24.6815	27.0609	28.5255	28.3403	29.607	27.7343	27.1475	24.6362	27.7548	29.9532	29.4724	30.8688		48h Y wash	9951.03	1264.64	6984.36	1516.5	592.363	667.111	295.878	984.352	1434.52	7190.04	971.443	236.928	322.588	131.642
12 48h 80to0 B		17.2328	19.6933	23.8626	27.0235	25.2054	26.9279	28.0368	28.7954	29.2506	26.721	27.2203	23.4281	27.8142	29.7304	29.0858	31.2188		48h Y add	8948.35	1176.59	3779.36	1251.05	613.979	377.317	281.711	1428.68	1036.95	11826.2	708.305	207.046	313.154	79.6481
																			C	Rac1	RhoA	CDC42	Rock1	Vegf	VegfR	RhoGap24l/2	CaraL7	Slc26a5	SM30	angio1	MyoD1	Notchl1	Pitx1
13 27h control C		16.7804	16.8571	21.9507	25.2432	22.0684	24.4014	24.9682	24.5897	26.0197	24.7253	23.9525	21.1413	23.3988	25.6717	26.5024	24.9065		27h cont	4943.92	597.417	4584.36	1025.53	712.74	908.735	362.937	833.028	1367.97	8312.11	1951.66	453.779	266.247	741.542
14 27h Rock 80 C		16.6473	17.0257	21.8094	24.4918	22.4901	24.4215	24.7187	24.5955	28.9606	28.9412	25.9821	24.1665	24.0837	32.6853	31.8119	30.136		27h Y	6032.24	1078.31	3896.89	1128.12	932.191	1008.86	61.2413	62.0077	414.295	1328.7	1401.24	5.60762	9.82296	28.8014
15 48h control C		16.9355	16.8124	21.355	24.3126	21.3098	24.0438	24.7565	25.1314	26.0975	23.3294	22.9788	19.7899	23.1165	25.771	24.8777	28.2761		48h cont	7041.58	1054.93	7248.92	1253.58	793.364	623.708	335.496	1982.84	2483.23	19228.4	2273.2	413.701	734.015	82.8686
16 48h Rock 80 C		16.7491	16.9858	21.1992	23.7537	21.4554	23.9237	25.1836	24.9052	27.8335	28.432	24.6582	25.0176	24.6273	30.7262	29.8461	31.095		48h y	8698.88	1688.07	7379.6	1513.58	674.197	806.122	123.058	83.8088	944.594	750.007	963.49	19.2213	33.8147	15.1696
17 48h 0to 80 C		16.8791	16.6463	21.022	23.267	21.1285	24.1924	25.0331	24.7364	28.4218	26.2865	24.6397	22.6377	24.5159	27.9213	26.8863	29.4598		48h Y wash	7837.96	1855.29	7320.15	1024.36	597.163	722.428	67.8385	267.128	768.729	2778.63	832.284	93.5394	181.764	34.8443
18 48h 80 to 0 C		16.8692	19.1855	23.2904	26.7052	25.4739	26.5298	27.841	29.4392	28.4582	28.2116	28.4347	26.164	27.5042	29.0515	30.149	30.0471		48h Y add	9325.91	1041.83	2296.23	1166	502.539	180.172	338.162	396.171	343.312	1474.49	623.841	231.067	114.244	121.964
																			D	Rac1	RhoA	CDC42	Rock1	Vegf	VegfR	RhoGap24l/2	CaraL7	Slc26a5	SM30	angio1	MyoD1	Notchl1	Pitx1
19 27h control D		16.7813	25.2531	29.9924	36.2651	32.7084	32.8949	32.6759	33.9616	32.913	36.1799		34.5539	33.3211	34.3201	35.1758	35.5218		27h cont	6206.39	110.736	1085.81	963.314	1108.71	485.741	952.164	116.966	1.42341e+12	332.134	732.758	385.909	222.822	178.446
20 27h Rock 80 D		16.7968	20.8941	26.9908	29.6724	27.9528	29.9744	29.3216	31.1816	33.561	35.25	33.2857	31.8113	29.727	33.9754	36.3047	34.4444		27h Y	2597	464.458	1400.58	382.634	581.74	176.306	38.2828	12.9475	45.6821	117.684	448.476	29.3408	6.57934	21.7144
21 48h control D		16.6962	18.2805	22.5057	25.8358	23.7607	25.4336	26.6903	28.3076	27.9666	25.9253	27.001	23.5261	25.0154	28.4339	28.051	30.3552		48h cont	8632.65	1018.27	3857.5	1318.24	588.389	208.372	259.357	961.454	482.015	4484.48	1724.09	192.153	245.675	55.9863
22 48h Rock 80 D		16.8617	16.7665	21.5082	24.227	21.1974	23.9626	24.9927	25.1392	27.789	27.5147	24.8033	25.9416	24.4938	29.3419	30.3612	29.6192		48h y	6196.77	1082.14	7565.02	1282.3	662.003	602.576	109.993	131.167	747.578	360.026	911.84	40.5973	21.1045	33.9776
23 48h 0to 80 D		16.6273	16.7741	21.2819	24.1538	20.8414	23.8589	24.5813	24.4799	26.5949	23.9411	23.2673	20.7292	23.7383	26.9432	25.1552	27.8034		48h Y wash	7200.94	1139.83	9554.02	1377.38	866.318	924.561	237.892	1306.56	2013.53	10267.1	1488.17	190.226	599.38	109.521
24 48h 80 to 0 D		16.8837	17.625	22.3053	25.105	21.9375	24.8993	25.569	26.3545	27.5889	23.8285	23.7245	20.9604	24.1583	27.2868	25.6572	28.5742		48h Y add	6446.21	1068.76	8162.67	1219.64	793.47	479.26	217.01	2424.93	2592.4	15282.8	1962.29	263.447	749.809	115.301
		gfp	ubi	rac1	rhoA	cdc42	Rock	vegf	vegfR	Rhogap	cara	Slc	sm30	fred	myoD	notch	pitx		e	Rac1	RhoA	CDC42	Rock1	Vegf	VegfR	RhoGap24l/2	CaraL7	Slc26a5	SM30	angio1	MyoD1	Notchl1	Pitx1
25 0 27e		17.8096	15.3868	20.5686	23.9963	20.7422	22.9337	23.5373	23.4166	24.5989	24.1517	23.9677	20.722	22.1916	24.3545	25.7547	23.8428		27h cont	4672.01	517.63	4179.46	1023.81	694.984	750.963	351.588	468.493	527.228	4234.02	1648.53	411.304	167.44	571.221
26 80 27e		17.9862	16.3134	21.8119	25.5453	23.2997	24.9683	24.6674	26.3662	27.7311	29.7674	28.1655	25.368	23.7863	29.5248	31.9681	28.7719		27h Y	3812.35	347.135	1467.18	502.759	609.869	204.969	85.35	23.0989	64.5806	388.993	1073.6	26.9895	5.62502	43.7596
27 0 48h control e		18.2367	23.1376	28.5964	31.3116	30.2046	32.757	31.2471	35.1628	33.729	33.763	34.1633	31.1827	32.8771	34.2655	35.179	34.6572		48h cont	3910.81	684.569	1393.13	270.71	713.479	57.7905	145.063	141.93	109.768	743.578	250.619	102.797	57.195	79.9469
28 80 48 inhibition e		18.0537	22.8392	28.1777	30.8962	29.9923	32.9462	30.8496	34.9624	31.9488	36.2389	31.1949	33.556	33.2083	32.6886	35.9082	35.8304		48h y	4224.99	737.984	1318.29	197.963	760.386	54.2694	375.518	23.9189	609.226	133.849	167.317	233.563	29.5755	31.0893
29 0to80 addition 48e		18.109	18.3577	23.3414	26.3237	24.4703	26.9574	27.4856	29.5012	28.3842	27.9064	27.8738	25.9781	26.5864	28.9918	29.642	31.1196		48h Y wash	5305.46	782.307	2570.66	520.877	371.109	101.777	208.453	283.271	289.269	976.598	660.951	141.137	92.9846	36.0181
30 80to0 wash 48e		18.198	19.0322	24.1847	27.5539	25.5102	27.6731	27.6109	30.9162	29.0486	28.1225	28.8167	26.8185	27.4219	29.1735	30.1706	31.9917		48h Y add	4760.87	547.658	2033.18	507.296	527.975	63.2784	209.818	380.182	243.492	877.984	596.05	193.656	102.114	31.7293
		gfp	ubi	rac1	rhoA	cdc42	Rock	vegf	vegfR	Rhogap	cara	Slc	sm30	fred	myoD	notch	pitx		f	Rac1	RhoA	CDC42	Rock1	Vegf	VegfR	RhoGap24l/2	CaraL7	Slc26a5	SM30	angio1	MyoD1	Notchl1	Pitx1
0 F		16.8623	14.7585	19.3697	22.9557	19.3208	21.9109	23.126	23.3534	24.0732	21.524	21.5547	18.3149	21.4654	24.8072	23.286	26.3412		48h cont	6738.14	674.435	6953.14	1318.8	604.616	522.476	329.18	1690.52	1657.53	13260.7	1755.31	205.501	545.589	76.7743
80 F		16.4136	16.303	21.3253	24.8787	22.2121	24.3327	25.4926	26.2459	26.6985	28.0232	25.6216	24.8045	24.5404	28.89	30.0488	29.3573		48h y	5175.37	528.98	2929.27	750.991	356.702	219.946	164.493	70.2891	328.348	554.752	657.266	40.2961	19.1527	29.8533
0to80 F		16.4653	14.8708	19.8999	23.1245	20.2358	22.4128	23.8194	23.7777	24.6244	22.8339	22.419	19.9682	22.5305	25.6301	24.3515	26.3888		48h Y wash	5153.26	650.441	4153.81	1027.08	416.402	427.686	248.375	783.833	1022.97	4932.06	952.306	130.248	295.913	80.0336
80to0 F		16.3707	15.2991	20.3339	23.5631	20.6612	23.0927	24.1647	24.7797	24.5811	22.596	22.6787	20.4194	22.676	25.5128	24.5564	26.7159		48h Y add	5134.26	646.119	4161.28	873.902	439.157	295.937	336.164	1202.01	1139.83	4860	1141.81	184.856	341.538	85.4025
second ran		gfp	ubi	rac1	rhoA	cdc42	Rock	vegf	vegfR	Rhogap	cara	Slc	sm30	fred	myoD	notch	pitx		d-second round	Rac1	RhoA	CDC42	Rock1	Vegf	VegfR	RhoGap24l/2	CaraL7	Slc26a5	SM30	angio1	MyoD1	Notchl1	Pitx1
0 D		16.3598	15.477	19.9493	22.3975	19.6726	22.6843	23.5208	24.0403	25.649	21.8187	22.1703	18.6047	21.6229	25.2022	23.5096	26.5319		0 D	7366.94	1530.49	8798.46	1273.18	744.237	533.213	189.877	2219.14	1770.82	17462.3	2516.25	252.938	749.589	107.736
80D		16.427	16.2292	20.6351	23.1752	20.5902	23.3605	24.628	24.5897	27.9348	26.9899	24.2627	25.4742	24.0546	28.9504	29.6576	29.1489		80D	7687.25	1505.61	7912.36	1336.81	592.581	607.336	70.9506	130.126	749.149	344.235	856.211	36.9705	23.4817	32.5474
0to80D		16.4501	16.9349	20.7437	23.3902	21.0387	23.5302	24.5654	24.5219	26.7388	23.4936	22.9936	20.7639	23.8903	26.7258	24.9868	27.7229		0to80D	11277.9	2062.99	9332.66	1885.69	970.318	997.788	240.484	1930.62	2661.12	11133	1496.62	242.492	740.382	127.869
																			a	Rac1	RhoA	CDC42	Rock1	Vegf	VegfR	RhoGap24l/2	CaraL7	Slc26a5	SM30	angio1	MyoD1	Notchl1	Pitx1
																			27h y/cont	0.722653	0.93696	1.17324	0.70109	1.02524	0.693329	0.316101	0.18343	0.482772	0.2607	0.460074	0.261259	0.0478083	0.0850436
																			48h ywash/cont	1.4824	1.25888	1.76568	0.963452	2.21872	1.18909	1.31294	3.71467	3.77144	5.1643	2.0866	2.85168	1.72618	2.63437
																			48h yadd/cont
																			48h y/cont	1.49931	1.3734	2.76252	1.02023	2.36124	1.90198	0.925725	0.916721	4.38618	1.02405	2.82267	1.51539	0.238692	3.32727
																			b	Rac1	RhoA	CDC42	Rock1	Vegf	VegfR	RhoGap24l/2	CaraL7	Slc26a5	SM30	angio1	MyoD1	Notchl1	Pitx1
																			27h y/cont	1.05263	1.10576	0.994041	1.24093	1.2274	1.45121	0.396275	0.121495	0.399392	0.412932	0.833817	0.137917	0.13937	0.157622
																			48h ywash/cont	1.07716	1.30351	1.27684	1.04617	1.00969	1.89564	1.14788	0.565173	1.34912	0.486168	0.757625	1.19275	0.681704	1.91921
																			48h yadd/cont	0.968619	1.21274	0.69092	0.86305	1.04653	1.07217	1.09292	0.82029	0.975212	0.799651	0.552405	1.04232	0.661768	1.16119
																			48h y/cont	0.812979	1.0315	0.549162	0.86376	0.789496	1.56815	0.519841	0.0597952	0.428575	0.0574895	0.368818	0.282495	0.031479	0.290628
																			c	Rac1	RhoA	CDC42	Rock1	Vegf	VegfR	RhoGap24l/2	CaraL7	Slc26a5	SM30	angio1	MyoD1	Notchl1	Pitx1
																			27h y/cont	1.22013	1.80495	0.850039	1.10003	1.3079	1.11018	0.168738	0.0744366	0.302854	0.159851	0.71797	0.0123576	0.0368942	0.0388399				Rac1	RhoA	CDC42	Rock1	Vegf	VegfR	RhoGap24l/2	CaraL7	Slc26a5	SM30	angio1	MyoD1	Notchl1
																			48h ywash/cont	1.1131	1.75868	1.00983	0.817148	0.752697	1.15828	0.202203	0.13472	0.309568	0.144507	0.366129	0.226104	0.24763	0.420476		b	48h yadd/cont	0.968619	1.21274	0.69092	0.86305	1.04653	1.07217	1.09292	0.82029	0.975212	0.799651	0.552405	1.04232	0.661768
																			48h yadd/cont	1.32441	0.987579	0.316769	0.930131	0.633428	0.288872	1.00795	0.1998	0.138252	0.0766827	0.274433	0.558537	0.155643	1.47177		c	48h yadd/cont	1.32441	0.987579	0.316769	0.930131	0.633428	0.288872	1.00795	0.1998	0.138252	0.0766827	0.274433	0.558537	0.155643
																			48h y/cont	1.23536	1.60017	1.01803	1.2074	0.849796	1.29247	0.366793	0.0422671	0.380389	0.0390052	0.423847	0.0464618	0.0460682	0.183056		f	48h yadd/cont	0.76197	0.958015	0.598475	0.662647	0.726341	0.566413	1.02122	0.711029	0.687672	0.366496	0.650492	0.899538	0.625999
																																					0.455567	0.25586	1.82056e-05	0.0119879	0.943131	0.940523	0.938452	0.0134941	0.0517996	0.0026494	3.29213e-06	0.122935	0.000731906
																			d	Rac1	RhoA	CDC42	Rock1	Vegf	VegfR	RhoGap24l/2	CaraL7	Slc26a5	SM30	angio1	MyoD1	Notchl1	Pitx1
																			27h y/cont
																			48h ywash/cont	0.834151	1.11938	2.47674	1.04487	1.47235	4.43707	0.917235	1.35894	4.17732	2.28947	0.863162	0.989972	2.43973	1.95621
																			48h yadd/cont	0.746724	1.04958	2.11605	0.925204	1.34855	2.30002	0.836721	2.52215	5.37826	3.40794	1.13816	1.37103	3.05204	2.05944
																			48h y/cont	0.717829	1.06272	1.96112	0.972736	1.12511	2.89182	0.4241	0.136426	1.55094	0.0802826	0.528881	0.211276	0.0859041	0.60689
																			e	Rac1	RhoA	CDC42	Rock1	Vegf	VegfR	RhoGap24l/2	CaraL7	Slc26a5	SM30	angio1	MyoD1	Notchl1	Pitx1
																			27h y/cont	0.815996	0.670623	0.351045	0.491068	0.877529	0.272942	0.242756	0.0493047	0.122491	0.0918733	0.651246	0.0656194	0.0335943	0.0766071
																			48h ywash/cont	1.35661	1.14277	1.84524	1.92412	0.52014	1.76113	1.43698	1.99584	2.63528	1.31338	2.63728	1.37297	1.62575	0.450526
																			48h yadd/cont	1.21736	0.800004	1.45943	1.87395	0.740001	1.09496	1.44639	2.67865	2.21824	1.18076	2.37831	1.88386	1.78537	0.39688
																			48h y/cont	1.08034	1.07803	0.946276	0.731272	1.06574	0.939071	2.58865	0.168526	5.55013	0.180007	0.667616	2.27208	0.517099	0.388875
																			f all good	Rac1	RhoA	CDC42	Rock1	Vegf	VegfR	RhoGap24l/2	CaraL7	Slc26a5	SM30	angio1	MyoD1	Notchl1	Pitx1
																			48h ywash/cont	0.76479	0.964423	0.597401	0.778799	0.688705	0.818576	0.754526	0.463663	0.617168	0.37193	0.542529	0.633804	0.542373	1.04245
																			48h yadd/cont	0.76197	0.958015	0.598475	0.662647	0.726341	0.566413	1.02122	0.711029	0.687672	0.366496	0.650492	0.899538	0.625999	1.11238
																			48h y/cont	0.768072	0.78433	0.421287	0.569448	0.589965	0.420968	0.499706	0.0415783	0.198095	0.0418342	0.374445	0.196087	0.0351046	0.388844
																			d-second round	Rac1	RhoA	CDC42	Rock1	Vegf	VegfR	RhoGap24l/2	CaraL7	Slc26a5	SM30	angio1	MyoD1	Notchl1	Pitx1
																			48h ywash/cont
																			48h yadd/cont	1.53087	1.34792	1.06071	1.48109	1.30378	1.87128	1.26653	0.869987	1.50277	0.637544	0.594784	0.958703	0.987717	1.18687
																			48h y/cont	1.04348	0.983742	0.899288	1.04998	0.796227	1.13901	0.373666	0.0586382	0.423053	0.019713	0.340273	0.146164	0.0313261	0.302103
																		average		Rac1	RhoA	CDC42	Rock1	Vegf	VegfR	RhoGap24l/2	CaraL7	Slc26a5	SM30	angio1	MyoD1	Notchl1	Pitx1
																		a,b,c,e	27h	0.952853	1.12957	0.842092	0.883281	1.10952	0.881917	0.280967	0.107167	0.326877	0.231339	0.665777	0.119288	0.0644168	0.089528
																		b,c,f	48h ywash/cont	0.985014	1.34221	0.961355	0.880706	0.81703	1.29083	0.701536	0.387852	0.758618	0.334201	0.555427	0.684221	0.490569	1.12738
																		b,c,f	48h yadd/cont	1.01833	1.05278	0.535388	0.818609	0.802101	0.642486	1.04069	0.57704	0.600379	0.414277	0.492443	0.833465	0.481136	1.24845
																		b,c,f,d	48h	0.964973	1.09993	0.721941	0.922648	0.756371	1.10515	0.440001	0.0505697	0.357528	0.0395105	0.376846	0.167802	0.0359945	0.291158
																				Rac1	RhoA	CDC42	Rock1	Vegf	VegfR	RhoGap24l/2	CaraL7	Slc26a5	SM30	angio1	MyoD1	Notchl1	Pitx1
																		stdev	27h y/cont	0.112958	0.242288	0.176527	0.173666	0.0975415	0.255379	0.0488072	0.0294968	0.0774125	0.0697612	0.0782552	0.0538649	0.0251684	0.0248212
																			48h ywash/cont	0.0957824	0.199271	0.171151	0.072287	0.0849435	0.275317	0.23753	0.112509	0.267008	0.0869636	0.0980332	0.242646	0.110813	0.376483
																			48h yadd/cont	0.142247	0.0696598	0.0974453	0.0695848	0.108362	0.198576	0.0228557	0.165618	0.212627	0.181922	0.0975341	0.124284	0.141226	0.0974688
																			48h y/cont	0.108453	0.175125	0.141234	0.137088	0.0570853	0.244729	0.0405162	0.00499991	0.0542238	0.00775049	0.0173611	0.0492834	0.00346956	0.0421789
																				2
																				Rac1	RhoA	CDC42	Rock1	Vegf	VegfR	RhoGap24l/2	CaraL7	Slc26a5	SM30	angio1	MyoD1	Notchl1	Pitx1
																		b	48h y/cont	0.812979	1.0315	0.549162	0.86376	0.789496	1.56815	0.519841	0.0597952	0.428575	0.0574895	0.368818	0.282495	0.031479	0.290628
																		c	48h y/cont	1.23536	1.60017	1.01803	1.2074	0.849796	1.29247	0.366793	0.0422671	0.380389	0.0390052	0.423847	0.0464618	0.0460682	0.183056
																		f	48h y/cont	0.768072	0.78433	0.421287	0.569448	0.589965	0.420968	0.499706	0.0415783	0.198095	0.0418342	0.374445	0.196087	0.0351046	0.388844
																		d	48h y/cont	1.04348	0.983742	0.899288	1.04998	0.796227	1.13901	0.373666	0.0586382	0.423053	0.019713	0.340273	0.146164	0.0313261	0.302103
																			ztest	0.373359	0.71588	0.0244894	0.286291	9.87025e-06	0.666276	0	0	0	0	0	0	0	0
																				Rac1	RhoA	CDC42	Rock1	Vegf	VegfR	RhoGap24l/2	CaraL7	Slc26a5	SM30	angio1	MyoD1	Notchl1	Pitx1
																		b,	48h ywash/cont	0.76479	0.964423	0.597401	0.778799	0.688705	0.818576	0.754526	0.463663	0.617168	0.37193	0.542529	0.633804	0.542373	1.04245
																		c	48h ywash/cont	1.07716	1.30351	1.27684	1.04617	1.00969	1.89564	1.14788	0.565173	1.34912	0.486168	0.757625	1.19275	0.681704	1.91921
																		f		1.1131	1.75868	1.00983	0.817148	0.752697	1.15828	0.202203	0.13472	0.309568	0.144507	0.366129	0.226104	0.24763	0.420476
																			ztest	0.55389	0.0684794	0.577516	0.0764752	0.0310603	0.180139	0.861744	1.22677e-06	0.78316	1.67455e-11	4.29427e-05	0.870138	3.4267e-05	0.384757
																		a
																		b
																		c
																		e
[truncated: 1 more columns]
